# Supplementary material for: GMCL1 Controls 53BP1 Stability and Modulates Taxane Sensitivity
Source: bioRxiv preprint, doi:10.1101/2025.03.18.643855, version 3 (2025-10-08)
Supplement: Supplementary Table 2 [file 643855_file04.xlsx]

## Sheet: 4A raw_data
IDs	depmap_id	LFC	Drug.Name	dose	ccle_name	Gender	tissue	Tissue_type	Cancer_type	Cancer_subtype	TP53	TP53_status	GMCL1_rna	TP53_rna	TP53BP1_rna	USP28_rna	TP53_prot	TP53BP1_prot	USP28_prot	GMCL1_group	TP53BP1_group	GMCL1_TP53BP1
BRD:BRD-K06858286-001-01-3	ACH-000001	-1.25416	CABAZITAXEL	2.5	NIHOVCAR3_OVARY	Female	OVARY	Ovary	Ovarian Carcinoma	High grade ovarian serous adenocarcinoma	2	Mutant	3.03713	5.65674	5.02699	3.56877	2.03756	4.37572	NA	Low	High	Low_High
BRD:BRD-K06858286-001-01-3	ACH-000007	-3.49119	CABAZITAXEL	2.5	LS513_LARGE_INTESTINE	Male	LARGE_INTESTINE	Large Intestine	Colorectal Carcinoma	Cecum adenocarcinoma	0	WT	3.23476	5.95091	4.24605	3.68324	NA	4.20772	NA	Low	High	Low_High
BRD:BRD-K06858286-001-01-3	ACH-000008	-1.17384	CABAZITAXEL	2.5	A101D_SKIN	Unknown	SKIN	NA	NA	NA	0	WT	3.54246	4.44084	4.16639	3.64412	NA	NA	NA	High	NA	High_NA
BRD:BRD-K06858286-001-01-3	ACH-000011	-1.60441	CABAZITAXEL	2.5	253J_URINARY_TRACT	Unknown	URINARY_TRACT	NA	NA	NA	0	WT	3.12599	5.41077	4.38694	3.32351	NA	NA	NA	Low	NA	Low_NA
BRD:BRD-K06858286-001-01-3	ACH-000012	-1.21009	CABAZITAXEL	2.5	HCC827_LUNG	Female	LUNG	Lung	Non-Small Cell Lung Carcinoma	Lung Adenocarcinoma	0	WT	2.97765	5.68926	4.36106	3.88185	NA	3.43392	NA	Low	Low	Low_Low
BRD:BRD-K06858286-001-01-3	ACH-000013	-2.31016	CABAZITAXEL	2.5	ONCODG1_OVARY	Female	OVARY	NA	NA	NA	2	Mutant	3.01531	6.09777	4.29803	3.72998	NA	NA	NA	Low	NA	Low_NA
BRD:BRD-K06858286-001-01-3	ACH-000014	-1.40732	CABAZITAXEL	2.5	HS294T_SKIN	Unknown	SKIN	NA	NA	NA	0	WT	3.75448	5.86806	3.86283	3.42448	NA	NA	NA	High	NA	High_NA
BRD:BRD-K06858286-001-01-3	ACH-000015	-2.63231	CABAZITAXEL	2.5	NCIH1581_LUNG	Male	LUNG	Lung	Non-Small Cell Lung Carcinoma	Lung large cell carcinoma	2	Mutant	3.33332	2.40535	3.86548	4.54578	NA	3.9951	NA	Low	High	Low_High
BRD:BRD-K06858286-001-01-3	ACH-000018	-2.29631	CABAZITAXEL	2.5	T24_URINARY_TRACT	Female	URINARY_TRACT	Bladder	Bladder Carcinoma	NA	0	WT	3.18138	3.36263	5.36645	4.66287	NA	4.46353	NA	Low	High	Low_High
BRD:BRD-K06858286-001-01-3	ACH-000019	-1.26932	CABAZITAXEL	2.5	MCF7_BREAST	Female	BREAST	Breast	Breast Carcinoma	Invasive Ductal Carcinoma of No Special Type	0	WT	3.50173	6.3123	3.90643	2.99134	NA	4.06704	NA	High	High	High_High
BRD:BRD-K06858286-001-01-3	ACH-000021	-0.583683	CABAZITAXEL	2.5	NCIH1693_LUNG	Female	LUNG	Lung	Non-Small Cell Lung Carcinoma	Lung Adenocarcinoma	0	WT	3.6374	4.05833	3.88304	4.59441	NA	3.57091	NA	High	Low	High_Low
BRD:BRD-K06858286-001-01-3	ACH-000022	0.0978052	CABAZITAXEL	2.5	PATU8988S_PANCREAS	Unknown	PANCREAS	NA	NA	NA	2	Mutant	3.87429	5.51019	3.45292	4.55336	NA	NA	NA	High	NA	High_NA
BRD:BRD-K06858286-001-01-3	ACH-000023	-1.7174	CABAZITAXEL	2.5	PATU8988T_PANCREAS	Female	PANCREAS	Pancreas	Pancreatic Carcinoma	Pancreatic adenocarcinoma	2	Mutant	3.85052	6.59519	3.88391	5.18607	3.29311	3.16898	NA	High	Low	High_Low
BRD:BRD-K06858286-001-01-3	ACH-000026	-0.965252	CABAZITAXEL	2.5	253JBV_URINARY_TRACT	Unknown	URINARY_TRACT	NA	NA	NA	0	WT	3.40249	5.64359	4.20639	3.9521	NA	NA	NA	High	NA	High_NA
BRD:BRD-K06858286-001-01-3	ACH-000027	-1.12225	CABAZITAXEL	2.5	GOS3_CENTRAL_NERVOUS_SYSTEM	Unknown	CENTRAL_NERVOUS_SYSTEM	NA	NA	NA	0	WT	3.87993	6.02784	5.75305	4.37665	NA	NA	NA	High	NA	High_NA
BRD:BRD-K06858286-001-01-3	ACH-000030	-4.12618	CABAZITAXEL	2.5	PC14_LUNG	Male	LUNG	Lung	Non-Small Cell Lung Carcinoma	Lung Adenocarcinoma	2	Mutant	3.13069	6.74456	4.44525	4.04837	5.14414	4.33118	NA	Low	High	Low_High
BRD:BRD-K06858286-001-01-3	ACH-000035	-2.34454	CABAZITAXEL	2.5	NCIH1650_LUNG	Male	LUNG	Lung	Non-Small Cell Lung Carcinoma	Lung Adenocarcinoma	0	WT	3.44476	3.61351	5.08649	4.46184	NA	3.75313	NA	Low	Low	Low_Low
BRD:BRD-K06858286-001-01-3	ACH-000037	-1.9176	CABAZITAXEL	2.5	S117_THYROID	Unknown	THYROID	NA	NA	NA	2	Mutant	2.69983	2.19376	4.37563	3.13441	NA	NA	NA	Low	NA	Low_NA
BRD:BRD-K06858286-001-01-3	ACH-000040	-2.6247	CABAZITAXEL	2.5	U118MG_CENTRAL_NERVOUS_SYSTEM	Male	CENTRAL_NERVOUS_SYSTEM	Central Nervous System	Glioma	Low Grade Glioma	2	Mutant	3.57633	4.97367	5.85276	4.59319	3.02349	4.65349	NA	High	High	High_High
BRD:BRD-K06858286-001-01-3	ACH-000041	-2.43017	CABAZITAXEL	2.5	RDES_BONE	Unknown	BONE	NA	NA	NA	2	Mutant	4.03665	6.64664	5.4161	4.49295	NA	NA	NA	High	NA	High_NA
BRD:BRD-K06858286-001-01-3	ACH-000042	-2.8896	CABAZITAXEL	2.5	PANC0203_PANCREAS	Female	PANCREAS	Pancreas	Pancreatic Carcinoma	Pancreatic adenocarcinoma	2	Mutant	2.7452	4.4467	4.45126	3.45289	3.81536	4.04583	NA	Low	High	Low_High
BRD:BRD-K06858286-001-01-3	ACH-000046	-3.14633	CABAZITAXEL	2.5	ACHN_KIDNEY	Male	KIDNEY	Kidney	Kidney Carcinoma	Papillary renal cell carcinoma	0	WT	3.16315	5.41794	4.85936	4.19638	NA	4.6473	NA	Low	High	Low_High
BRD:BRD-K06858286-001-01-3	ACH-000047	-3.24393	CABAZITAXEL	2.5	GCIY_STOMACH	Female	STOMACH	Stomach	Gastric Carcinoma	Gastric adenocarcinoma	2	Mutant	NA	NA	NA	NA	NA	4.82782	NA	NA	High	NA_High
BRD:BRD-K06858286-001-01-3	ACH-000048	-1.93329	CABAZITAXEL	2.5	TOV112D_OVARY	Female	OVARY	Ovary	Ovarian Carcinoma	Ovarian endometrioid adenocarcinoma	2	Mutant	3.90785	6.7739	5.0774	4.27599	3.64731	4.03285	NA	High	Low	High_Low
BRD:BRD-K06858286-001-01-3	ACH-000052	-1.3353	CABAZITAXEL	2.5	A673_BONE	Female	BONE	Bone	Ewing's Sarcoma	NA	0	WT	3.98157	3.41135	4.99926	4.40187	NA	4.23095	NA	Low	High	Low_High
BRD:BRD-K06858286-001-01-3	ACH-000054	-3.87606	CABAZITAXEL	2.5	HT1080_SOFT_TISSUE	Male	SOFT_TISSUE	Soft Tissue	Other Sarcomas	Fibrosarcoma	0	WT	3.24636	5.21802	3.93958	3.83853	NA	3.89103	NA	Low	Low	Low_Low
BRD:BRD-K06858286-001-01-3	ACH-000060	-3.00336	CABAZITAXEL	2.5	PANC1005_PANCREAS	Male	PANCREAS	Pancreas	Pancreatic Carcinoma	Pancreatic ductal adenocarcinoma	2	Mutant	3.70453	4.67449	4.36106	3.48707	NA	3.24938	NA	High	Low	High_Low
BRD:BRD-K06858286-001-01-3	ACH-000062	-3.29605	CABAZITAXEL	2.5	RERFLCMS_LUNG	Male	LUNG	Lung	Non-Small Cell Lung Carcinoma	Lung Adenocarcinoma	0	WT	3.28205	2.43045	4.78038	4.10322	NA	4.3109	NA	Low	High	Low_High
BRD:BRD-K06858286-001-01-3	ACH-000066	-2.16774	CABAZITAXEL	2.5	HCC4006_LUNG	Unknown	LUNG	NA	NA	NA	2	Mutant	3.7077	6.44023	4.43679	4.17883	NA	NA	NA	High	NA	High_NA
BRD:BRD-K06858286-001-01-3	ACH-000075	-1.1648	CABAZITAXEL	2.5	U87MG_CENTRAL_NERVOUS_SYSTEM	Unknown	CENTRAL_NERVOUS_SYSTEM	NA	NA	NA	0	WT	3.10387	3.9106	4.94268	1.5381	NA	NA	NA	Low	NA	Low_NA
BRD:BRD-K06858286-001-01-3	ACH-000078	-0.787285	CABAZITAXEL	2.5	MHHNB11_AUTONOMIC_GANGLIA	Male	AUTONOMIC_GANGLIA	Peripheral Nervous System	Neuroblastoma	NA	0	WT	4.30676	5.02547	5.66364	3.8265	NA	4.95444	NA	High	High	High_High
BRD:BRD-K06858286-001-01-3	ACH-000082	-1.05417	CABAZITAXEL	2.5	G292CLONEA141B1_BONE	Female	BONE	Bone	Osteosarcoma	NA	0	WT	2.84148	2.51512	5.27354	4.64098	NA	4.58237	NA	Low	High	Low_High
BRD:BRD-K06858286-001-01-3	ACH-000085	-1.85993	CABAZITAXEL	2.5	NA	Unknown	NA	NA	NA	NA	2	Mutant	2.54541	5.23467	4.62394	4.38369	NA	NA	NA	Low	NA	Low_NA
BRD:BRD-K06858286-001-01-3	ACH-000086	-0.0717764	CABAZITAXEL	2.5	ACCMESO1_PLEURA	Unknown	PLEURA	NA	NA	NA	0	WT	2.73909	1.77681	3.3926	3.37952	NA	NA	NA	Low	NA	Low_NA
BRD:BRD-K06858286-001-01-3	ACH-000087	-3.75995	CABAZITAXEL	2.5	SKES1_BONE	Male	BONE	Bone	Ewing's Sarcoma	NA	2	Mutant	4.07993	6.92512	5.49217	4.08884	4.46983	4.81089	0.00377	High	High	High_High
BRD:BRD-K06858286-001-01-3	ACH-000090	-1.71083	CABAZITAXEL	2.5	PC3_PROSTATE	Male	PROSTATE	Prostate	Prostate Carcinoma	NA	0	WT	2.76937	1.57116	4.10584	3.43746	NA	4.10717	NA	Low	High	Low_High
BRD:BRD-K06858286-001-01-3	ACH-000091	-0.677753	CABAZITAXEL	2.5	OV56_OVARY	Female	OVARY	Ovary	Ovarian Carcinoma	Ovarian serous adenocarcinoma	0	WT	3.33196	2.57506	4.9366	3.90116	NA	4.00673	NA	High	Low	High_Low
BRD:BRD-K06858286-001-01-3	ACH-000092	-3.32749	CABAZITAXEL	2.5	NCIH2452_PLEURA	Male	PLEURA	Lung	Mesothelioma	Pleural Biphasic Mesothelioma	0	WT	3.09909	5.10101	5.39148	3.88088	NA	4.67738	NA	Low	High	Low_High
BRD:BRD-K06858286-001-01-3	ACH-000096	-3.15577	CABAZITAXEL	2.5	G401_SOFT_TISSUE	Male	SOFT_TISSUE	Other tissue	Other Solid Carcinomas	Rhabdoid Tumour of the Kidney	0	WT	4.37208	5.79132	5.06865	4.84659	NA	4.48878	NA	High	High	High_High
BRD:BRD-K06858286-001-01-3	ACH-000097	-1.50656	CABAZITAXEL	2.5	ZR751_BREAST	Female	BREAST	NA	NA	NA	0	WT	3.9964	4.1056	4.18509	3.77431	NA	NA	NA	High	NA	High_NA
BRD:BRD-K06858286-001-01-3	ACH-000098	-1.74941	CABAZITAXEL	2.5	GAMG_CENTRAL_NERVOUS_SYSTEM	Female	CENTRAL_NERVOUS_SYSTEM	Central Nervous System	Glioblastoma	NA	2	Mutant	3.09269	5.03518	5.42873	4.41708	NA	3.56964	0.69865	Low	Low	Low_Low
BRD:BRD-K06858286-001-01-3	ACH-000099	-1.88574	CABAZITAXEL	2.5	SIMA_AUTONOMIC_GANGLIA	Male	AUTONOMIC_GANGLIA	Peripheral Nervous System	Neuroblastoma	NA	0	WT	3.72659	4.98872	4.65414	3.23625	NA	4.63977	NA	Low	Low	Low_Low
BRD:BRD-K06858286-001-01-3	ACH-000102	-0.457526	CABAZITAXEL	2.5	NA	Unknown	NA	NA	NA	NA	2	Mutant	3.56008	6.4366	5.57491	3.94559	NA	NA	NA	High	NA	High_NA
BRD:BRD-K06858286-001-01-3	ACH-000107	-1.29995	CABAZITAXEL	2.5	CAPAN2_PANCREAS	Male	PANCREAS	Pancreas	Pancreatic Carcinoma	Pancreatic ductal adenocarcinoma	2	Mutant	3.418	5.08578	4.15549	4.24479	NA	3.6229	NA	High	Low	High_Low
BRD:BRD-K06858286-001-01-3	ACH-000108	-1.81226	CABAZITAXEL	2.5	KP3_PANCREAS	Male	PANCREAS	Pancreas	Pancreatic Carcinoma	Pancreatic adenosquamous carcinoma	0	WT	4.29547	3.53802	4.25495	4.23785	NA	4.37908	NA	High	High	High_High
BRD:BRD-K06858286-001-01-3	ACH-000114	-1.49352	CABAZITAXEL	2.5	NA	Female	NA	Pancreas	Pancreatic Carcinoma	Pancreatic adenocarcinoma	2	Mutant	3.26788	5.34958	4.36805	4.15376	NA	3.50141	NA	Low	Low	Low_Low
BRD:BRD-K06858286-001-01-3	ACH-000116	-2.43971	CABAZITAXEL	2.5	NA	Female	NA	Ovary	Ovarian Carcinoma	High grade ovarian serous adenocarcinoma	0	WT	4.18821	1.82969	4.2753	4.79889	NA	3.8228	NA	High	Low	High_Low
BRD:BRD-K06858286-001-01-3	ACH-000117	-0.523949	CABAZITAXEL	2.5	EFM192A_BREAST	Female	BREAST	Breast	Breast Carcinoma	NA	0	WT	3.51743	2.76385	4.17072	2.86583	NA	3.97948	NA	High	High	High_High
BRD:BRD-K06858286-001-01-3	ACH-000118	-3.38305	CABAZITAXEL	2.5	HUPT3_PANCREAS	Male	PANCREAS	Pancreas	Pancreatic Carcinoma	Pancreatic adenocarcinoma	2	Mutant	2.79118	4.17656	4.46499	2.53861	NA	3.32092	NA	Low	Low	Low_Low
BRD:BRD-K06858286-001-01-3	ACH-000120	-0.668296	CABAZITAXEL	2.5	CHP212_AUTONOMIC_GANGLIA	Male	AUTONOMIC_GANGLIA	Peripheral Nervous System	Neuroblastoma	NA	0	WT	3.6374	6.40563	5.16073	4.41777	NA	4.83829	NA	Low	Low	Low_Low
BRD:BRD-K06858286-001-01-3	ACH-000123	-2.17046	CABAZITAXEL	2.5	COV434_OVARY	Female	OVARY	NA	NA	NA	0	WT	3.61508	4.75611	4.12232	4.15783	NA	NA	NA	High	NA	High_NA
BRD:BRD-K06858286-001-01-3	ACH-000132	-1.62221	CABAZITAXEL	2.5	JHOS2_OVARY	Female	OVARY	Ovary	Ovarian Carcinoma	High grade ovarian serous adenocarcinoma	0	WT	3.67567	6.30249	2.82904	4.08288	NA	2.9704	NA	High	Low	High_Low
BRD:BRD-K06858286-001-01-3	ACH-000133	-2.15357	CABAZITAXEL	2.5	HS729_SOFT_TISSUE	Unknown	SOFT_TISSUE	NA	NA	NA	2	Mutant	2.79118	6.39499	4.83302	3.96228	NA	NA	NA	Low	NA	Low_NA
BRD:BRD-K06858286-001-01-3	ACH-000137	-3.20231	CABAZITAXEL	2.5	8MGBA_CENTRAL_NERVOUS_SYSTEM	Female	CENTRAL_NERVOUS_SYSTEM	Central Nervous System	Glioblastoma	NA	2	Mutant	4.075	6.37167	4.94528	3.31793	3.2683	3.90342	NA	High	Low	High_Low
BRD:BRD-K06858286-001-01-3	ACH-000138	-4.28535	CABAZITAXEL	2.5	CFPAC1_PANCREAS	Male	PANCREAS	Pancreas	Pancreatic Carcinoma	Pancreatic ductal adenocarcinoma	2	Mutant	3.11497	3.99377	4.54655	2.92446	NA	5.08581	NA	Low	High	Low_High
BRD:BRD-K06858286-001-01-3	ACH-000139	-2.85813	CABAZITAXEL	2.5	PANC0327_PANCREAS	Female	PANCREAS	Pancreas	Pancreatic Carcinoma	Pancreatic adenocarcinoma	0	WT	2.59571	4.28544	3.25634	3.59469	NA	3.30836	NA	Low	Low	Low_Low
BRD:BRD-K06858286-001-01-3	ACH-000141	-2.82939	CABAZITAXEL	2.5	SNU308_BILIARY_TRACT	Unknown	BILIARY_TRACT	NA	NA	NA	0	WT	3.57864	5.16772	5.00219	3.93249	NA	NA	NA	High	NA	High_NA
BRD:BRD-K06858286-001-01-3	ACH-000142	-3.38323	CABAZITAXEL	2.5	CAL29_URINARY_TRACT	Female	URINARY_TRACT	Bladder	Bladder Carcinoma	NA	2	Mutant	3.36565	4.96816	4.95906	3.48832	NA	4.33013	NA	High	High	High_High
BRD:BRD-K06858286-001-01-3	ACH-000147	-1.87458	CABAZITAXEL	2.5	T47D_BREAST	Female	BREAST	Breast	Breast Carcinoma	Invasive Ductal Carcinoma of No Special Type	2	Mutant	3.13537	5.52392	4.87938	4.52023	3.62894	3.82558	NA	Low	Low	Low_Low
BRD:BRD-K06858286-001-01-3	ACH-000149	-0.0547324	CABAZITAXEL	2.5	SKNSH_AUTONOMIC_GANGLIA	Female	AUTONOMIC_GANGLIA	Peripheral Nervous System	Neuroblastoma	NA	0	WT	3.78786	5.90501	5.01133	4.54578	NA	4.88008	NA	Low	High	Low_High
BRD:BRD-K06858286-001-01-3	ACH-000153	-0.856281	CABAZITAXEL	2.5	NCIH2052_PLEURA	Male	PLEURA	Lung	Mesothelioma	Pleural Sarcomatoid Mesothelioma	0	WT	3.73076	5.03869	3.76793	4.81015	NA	2.75167	NA	High	Low	High_Low
BRD:BRD-K06858286-001-01-3	ACH-000155	-1.02215	CABAZITAXEL	2.5	SW1990_PANCREAS	Male	PANCREAS	Pancreas	Pancreatic Carcinoma	Pancreatic adenocarcinoma	0	WT	2.48366	5.33596	2.88574	3.7691	3.58753	3.05674	NA	Low	Low	Low_Low
BRD:BRD-K06858286-001-01-3	ACH-000159	-2.05272	CABAZITAXEL	2.5	OSRC2_KIDNEY	Male	KIDNEY	Kidney	Kidney Carcinoma	NA	0	WT	2.90295	4.92524	4.82132	4.13984	NA	3.94947	NA	Low	Low	Low_Low
BRD:BRD-K06858286-001-01-3	ACH-000161	-0.538912	CABAZITAXEL	2.5	CORL105_LUNG	Male	LUNG	Lung	Non-Small Cell Lung Carcinoma	Lung Adenocarcinoma	0	WT	3.58439	4.41448	4.44826	2.33705	NA	3.7525	NA	High	Low	High_Low
BRD:BRD-K06858286-001-01-3	ACH-000163	-2.94132	CABAZITAXEL	2.5	SW579_THYROID	Unknown	THYROID	NA	NA	NA	2	Mutant	3.12599	6.06776	5.19671	4.0769	NA	NA	NA	High	NA	High_NA
BRD:BRD-K06858286-001-01-3	ACH-000164	-1.17312	CABAZITAXEL	2.5	PANC1_PANCREAS	Unknown	PANCREAS	NA	NA	NA	2	Mutant	3.07494	5.00676	5.3589	4.68271	NA	NA	NA	Low	NA	Low_NA
BRD:BRD-K06858286-001-01-3	ACH-000169	-2.2203	CABAZITAXEL	2.5	RD_SOFT_TISSUE	Female	SOFT_TISSUE	Soft Tissue	Rhabdomyosarcoma	Embryonal rhabdomyosarcoma	2	Mutant	3.63074	5.65149	5.57377	5.07209	4.22686	4.58741	NA	High	High	High_High
BRD:BRD-K06858286-001-01-3	ACH-000171	-3.07502	CABAZITAXEL	2.5	VMRCRCZ_KIDNEY	Unknown	KIDNEY	Kidney	Kidney Carcinoma	NA	0	WT	4.77189	2.73162	5.0051	4.44774	NA	3.90681	NA	High	Low	High_Low
BRD:BRD-K06858286-001-01-3	ACH-000172	-3.39857	CABAZITAXEL	2.5	TM87_SOFT_TISSUE	Unknown	SOFT_TISSUE	NA	NA	NA	0	WT	3.83607	5.59831	6.34359	4.57402	NA	NA	NA	High	NA	High_NA
BRD:BRD-K06858286-001-01-3	ACH-000174	-4.04359	CABAZITAXEL	2.5	CAL62_THYROID	Female	THYROID	Thyroid	Thyroid Gland Carcinoma	Thyroid gland anaplastic carcinoma	2	Mutant	3.54718	5.832	4.69604	4.3088	NA	4.10617	NA	High	Low	High_Low
BRD:BRD-K06858286-001-01-3	ACH-000176	-2.19972	CABAZITAXEL	2.5	LOUNH91_LUNG	Female	LUNG	Lung	Non-Small Cell Lung Carcinoma	Squamous Cell Lung Carcinoma	2	Mutant	3.01193	5.5825	4.72984	4.59073	NA	4.07443	NA	Low	High	Low_High
BRD:BRD-K06858286-001-01-3	ACH-000178	0.158038	CABAZITAXEL	2.5	HS766T_PANCREAS	Male	PANCREAS	Pancreas	Pancreatic Carcinoma	Pancreatic adenocarcinoma	0	WT	3.48093	7.01425	4.06923	4.39839	NA	2.72638	NA	High	Low	High_Low
BRD:BRD-K06858286-001-01-3	ACH-000182	-2.60129	CABAZITAXEL	2.5	SNU869_BILIARY_TRACT	Unknown	BILIARY_TRACT	NA	NA	NA	0	WT	4.36264	4.22258	4.49033	3.82952	NA	NA	NA	High	NA	High_NA
BRD:BRD-K06858286-001-01-3	ACH-000186	-2.51575	CABAZITAXEL	2.5	NCIH2444_LUNG	Male	LUNG	Lung	Non-Small Cell Lung Carcinoma	NA	2	Mutant	2.55237	5.30907	3.6586	3.53757	2.96028	4.63375	NA	Low	High	Low_High
BRD:BRD-K06858286-001-01-3	ACH-000188	-3.16371	CABAZITAXEL	2.5	SCC25_UPPER_AERODIGESTIVE_TRACT	Male	UPPER_AERODIGESTIVE_TRACT	Head and Neck	Head and Neck Carcinoma	Tongue Squamous Cell Carcinoma	0	WT	1.84739	1.85909	2.76284	3.35381	NA	3.59427	NA	Low	Low	Low_Low
BRD:BRD-K06858286-001-01-3	ACH-000189	-1.94577	CABAZITAXEL	2.5	RCC10RGB_KIDNEY	Male	KIDNEY	Kidney	Kidney Carcinoma	NA	0	WT	2.64435	5.59619	4.93834	2.86396	NA	3.70769	NA	Low	Low	Low_Low
BRD:BRD-K06858286-001-01-3	ACH-000191	-3.60651	CABAZITAXEL	2.5	BHT101_THYROID	Female	THYROID	Thyroid	Thyroid Gland Carcinoma	Thyroid gland anaplastic carcinoma	2	Mutant	3.0668	5.55131	4.01981	3.05546	2.45814	3.63103	NA	Low	Low	Low_Low
BRD:BRD-K06858286-001-01-3	ACH-000192	-2.4455	CABAZITAXEL	2.5	MFE280_ENDOMETRIUM	Female	ENDOMETRIUM	Endometrium	Endometrial Carcinoma	Endometrial adenocarcinoma	0	WT	3.39206	4.40246	5.17939	4.42531	NA	4.57703	NA	Low	Low	Low_Low
BRD:BRD-K06858286-001-01-3	ACH-000200	-2.85796	CABAZITAXEL	2.5	NA	Female	NA	Central Nervous System	Glioma	Low Grade Glioma	0	WT	3.14623	4.91384	4.53297	3.90594	NA	4.36371	NA	Low	High	Low_High
BRD:BRD-K06858286-001-01-3	ACH-000201	-1.59875	CABAZITAXEL	2.5	A204_SOFT_TISSUE	Female	SOFT_TISSUE	Soft Tissue	Rhabdomyosarcoma	Embryonal rhabdomyosarcoma	0	WT	2.45674	5.74074	4.79383	4.08544	NA	5.28539	NA	Low	High	Low_High
BRD:BRD-K06858286-001-01-3	ACH-000205	-1.30147	CABAZITAXEL	2.5	PK59_PANCREAS	Unknown	PANCREAS	NA	NA	NA	0	WT	3.11023	3.57914	3.96955	3.26829	NA	NA	NA	Low	NA	Low_NA
BRD:BRD-K06858286-001-01-3	ACH-000207	-1.44984	CABAZITAXEL	2.5	DETROIT562_UPPER_AERODIGESTIVE_TRACT	Female	UPPER_AERODIGESTIVE_TRACT	Head and Neck	Head and Neck Carcinoma	Pharyngeal squamous cell carcinoma	2	Mutant	2.06899	6.1619	3.85129	2.83946	3.63874	4.00417	NA	Low	High	Low_High
BRD:BRD-K06858286-001-01-3	ACH-000209	-0.0990979	CABAZITAXEL	2.5	SNU1079_BILIARY_TRACT	Unknown	BILIARY_TRACT	NA	NA	NA	0	WT	2.57078	5.58555	3.84861	3.01697	NA	NA	NA	Low	NA	Low_NA
BRD:BRD-K06858286-001-01-3	ACH-000210	-1.96982	CABAZITAXEL	2.5	CADOES1_BONE	Female	BONE	Bone	Ewing's Sarcoma	NA	0	WT	3.13069	5.16207	4.53864	3.74913	NA	3.44107	NA	Low	Low	Low_Low
BRD:BRD-K06858286-001-01-3	ACH-000211	-3.5649	CABAZITAXEL	2.5	DAOY_CENTRAL_NERVOUS_SYSTEM	Male	CENTRAL_NERVOUS_SYSTEM	Central Nervous System	Other Solid Carcinomas	Medulloblastoma	2	Mutant	3.58439	7.60068	5.16523	4.29695	3.95349	4.05886	NA	High	Low	High_Low
BRD:BRD-K06858286-001-01-3	ACH-000212	-0.171797	CABAZITAXEL	2.5	CAL120_BREAST	Female	BREAST	Breast	Breast Carcinoma	NA	0	WT	3.55891	3.83041	3.66466	4.74189	NA	3.42062	1.0141	High	Low	High_Low
BRD:BRD-K06858286-001-01-3	ACH-000213	-3.98728	CABAZITAXEL	2.5	HUPT4_PANCREAS	Male	PANCREAS	Pancreas	Pancreatic Carcinoma	Pancreatic adenocarcinoma	2	Mutant	3.46358	5.11818	3.71132	3.55685	2.25856	3.05173	NA	High	Low	High_Low
BRD:BRD-K06858286-001-01-3	ACH-000217	-1.31212	CABAZITAXEL	2.5	JHH6_LIVER	Female	LIVER	Liver	Hepatocellular Carcinoma	NA	0	WT	3.27214	4.75558	4.06305	4.92793	NA	4.60451	NA	Low	High	Low_High
BRD:BRD-K06858286-001-01-3	ACH-000219	-2.58652	CABAZITAXEL	2.5	A375_SKIN	Female	SKIN	Skin	Melanoma	Cutaneous melanoma	0	WT	3.73491	5.30797	4.23502	4.15132	NA	3.6692	NA	High	Low	High_Low
BRD:BRD-K06858286-001-01-3	ACH-000221	-1.36682	CABAZITAXEL	2.5	SNU398_LIVER	Male	LIVER	Liver	Hepatocellular Carcinoma	NA	2	Mutant	4.11718	3.46356	4.58437	4.19876	NA	4.28751	NA	High	High	High_High
BRD:BRD-K06858286-001-01-3	ACH-000222	-1.82281	CABAZITAXEL	2.5	ASPC1_PANCREAS	Female	PANCREAS	Pancreas	Pancreatic Carcinoma	Pancreatic ductal adenocarcinoma	0	WT	4.06923	2.45513	3.78944	3.77119	NA	2.8808	NA	High	Low	High_Low
BRD:BRD-K06858286-001-01-3	ACH-000223	-1.40131	CABAZITAXEL	2.5	HCC1937_BREAST	Female	BREAST	Breast	Breast Carcinoma	Ductal Breast Carcinoma	2	Mutant	3.35361	4.15222	4.1156	4.81069	NA	3.83084	NA	Low	Low	Low_Low
BRD:BRD-K06858286-001-01-3	ACH-000227	-1.24192	CABAZITAXEL	2.5	KPNYN_AUTONOMIC_GANGLIA	Male	AUTONOMIC_GANGLIA	Peripheral Nervous System	Neuroblastoma	NA	0	WT	3.69391	5.84796	4.7634	3.68324	NA	4.3914	NA	Low	Low	Low_Low
BRD:BRD-K06858286-001-01-3	ACH-000228	-1.67569	CABAZITAXEL	2.5	BICR31_UPPER_AERODIGESTIVE_TRACT	Male	UPPER_AERODIGESTIVE_TRACT	Head and Neck	Head and Neck Carcinoma	Tongue Squamous Cell Carcinoma	0	WT	2.17741	5.95449	3.77825	2.98962	NA	3.15448	NA	Low	Low	Low_Low
BRD:BRD-K06858286-001-01-3	ACH-000231	-3.84625	CABAZITAXEL	2.5	KALS1_CENTRAL_NERVOUS_SYSTEM	Female	CENTRAL_NERVOUS_SYSTEM	Central Nervous System	Glioblastoma	NA	2	Mutant	2.98974	6.2168	4.80859	4.00233	3.62013	4.3294	NA	Low	High	Low_High
BRD:BRD-K06858286-001-01-3	ACH-000232	-2.94456	CABAZITAXEL	2.5	U251MG_CENTRAL_NERVOUS_SYSTEM	Male	CENTRAL_NERVOUS_SYSTEM	Central Nervous System	Glioma	Low Grade Glioma	2	Mutant	3.33604	6.26841	5.36776	4.41501	3.29077	5.0567	NA	Low	High	Low_High
BRD:BRD-K06858286-001-01-3	ACH-000234	-1.82753	CABAZITAXEL	2.5	NA	Unknown	NA	NA	NA	NA	0	WT	3.3855	5.22501	4.71177	3.66213	NA	NA	NA	High	NA	High_NA
BRD:BRD-K06858286-001-01-3	ACH-000235	-2.61727	CABAZITAXEL	2.5	PANC0403_PANCREAS	Male	PANCREAS	Pancreas	Pancreatic Carcinoma	Pancreatic ductal adenocarcinoma	2	Mutant	3.05533	4.90859	4.23294	3.57588	NA	3.72031	NA	Low	High	Low_High
BRD:BRD-K06858286-001-01-3	ACH-000237	-4.50619	CABAZITAXEL	2.5	JHOM1_OVARY	Female	OVARY	NA	NA	NA	1	Mutant	3.10864	4.88008	5.36153	3.82247	NA	NA	NA	Low	NA	Low_NA
BRD:BRD-K06858286-001-01-3	ACH-000242	-2.69106	CABAZITAXEL	2.5	RT4_URINARY_TRACT	Male	URINARY_TRACT	Bladder	Bladder Carcinoma	NA	0	WT	3.9657	5.3065	4.55049	4.04837	NA	3.99636	NA	High	Low	High_Low
BRD:BRD-K06858286-001-01-3	ACH-000243	-4.53808	CABAZITAXEL	2.5	DANG_PANCREAS	Female	PANCREAS	Pancreas	Pancreatic Carcinoma	Pancreatic adenocarcinoma	0	WT	2.99146	3.26446	4.3412	5.16326	NA	2.91622	0.8478	Low	Low	Low_Low
BRD:BRD-K06858286-001-01-3	ACH-000244	-2.0625	CABAZITAXEL	2.5	DKMG_CENTRAL_NERVOUS_SYSTEM	Female	CENTRAL_NERVOUS_SYSTEM	Central Nervous System	Glioblastoma	NA	0	WT	3.25644	5.21021	5.35296	3.47954	NA	4.82401	NA	Low	High	Low_High
BRD:BRD-K06858286-001-01-3	ACH-000249	-2.68499	CABAZITAXEL	2.5	CL11_LARGE_INTESTINE	Male	LARGE_INTESTINE	Large Intestine	Colorectal Carcinoma	Colon adenocarcinoma	2	Mutant	3.2693	4.09166	4.64414	3.8042	NA	4.7061	NA	Low	High	Low_High
BRD:BRD-K06858286-001-01-3	ACH-000250	-2.87527	CABAZITAXEL	2.5	KMRC20_KIDNEY	Unknown	KIDNEY	Kidney	Kidney Carcinoma	Clear cell renal cell carcinoma	0	WT	3.42057	2.39009	5.05824	4.41156	NA	4.5255	NA	Low	High	Low_High
BRD:BRD-K06858286-001-01-3	ACH-000252	-0.596127	CABAZITAXEL	2.5	LS1034_LARGE_INTESTINE	Male	LARGE_INTESTINE	Large Intestine	Colorectal Carcinoma	Cecum adenocarcinoma	2	Mutant	3.30721	6.27806	4.63301	3.50821	NA	4.07431	NA	Low	High	Low_High
BRD:BRD-K06858286-001-01-3	ACH-000255	-3.38388	CABAZITAXEL	2.5	LMSU_STOMACH	Unknown	STOMACH	NA	NA	NA	2	Mutant	2.86601	6.41357	4.46974	4.04313	NA	NA	NA	Low	NA	Low_NA
BRD:BRD-K06858286-001-01-3	ACH-000256	-0.644001	CABAZITAXEL	2.5	COV318_OVARY	Female	OVARY	NA	NA	NA	2	Mutant	3.3086	4.63885	3.87692	4.30437	NA	NA	NA	High	NA	High_NA
BRD:BRD-K06858286-001-01-3	ACH-000259	-1.5818	CABAZITAXEL	2.5	KELLY_AUTONOMIC_GANGLIA	Female	AUTONOMIC_GANGLIA	Peripheral Nervous System	Neuroblastoma	NA	0	WT	3.7555	4.93138	5.21384	4.41777	NA	5.01452	NA	Low	High	Low_High
BRD:BRD-K06858286-001-01-3	ACH-000260	-2.37269	CABAZITAXEL	2.5	SKNAS_AUTONOMIC_GANGLIA	Female	AUTONOMIC_GANGLIA	Peripheral Nervous System	Neuroblastoma	NA	0	WT	3.57979	4.29195	5.45801	2.95826	NA	4.45208	NA	Low	Low	Low_Low
BRD:BRD-K06858286-001-01-3	ACH-000261	-4.49382	CABAZITAXEL	2.5	RERFLCAI_LUNG	Unknown	LUNG	NA	NA	NA	2	Mutant	3.7606	3.59299	4.5187	4.96173	NA	NA	NA	High	NA	High_NA
BRD:BRD-K06858286-001-01-3	ACH-000264	-3.90363	CABAZITAXEL	2.5	CALU6_LUNG	Female	LUNG	Lung	Non-Small Cell Lung Carcinoma	Lung adenocarcinoma	2	Mutant	3.80378	3.47229	5.49578	3.33598	NA	5.27637	NA	High	High	High_High
BRD:BRD-K06858286-001-01-3	ACH-000265	-1.37629	CABAZITAXEL	2.5	KP4_PANCREAS	Male	PANCREAS	Pancreas	Pancreatic Carcinoma	NA	0	WT	3.55188	1.37861	5.09475	4.51572	NA	4.26291	NA	High	High	High_High
BRD:BRD-K06858286-001-01-3	ACH-000266	-0.5702	CABAZITAXEL	2.5	SNU213_PANCREAS	Unknown	PANCREAS	NA	NA	NA	2	Mutant	2.70819	5.57944	3.7651	3.4745	NA	NA	NA	Low	NA	Low_NA
BRD:BRD-K06858286-001-01-3	ACH-000268	-1.92428	CABAZITAXEL	2.5	SNU245_BILIARY_TRACT	Unknown	BILIARY_TRACT	NA	NA	NA	2	Mutant	4.04675	6.03803	3.89435	3.23478	NA	NA	NA	High	NA	High_NA
BRD:BRD-K06858286-001-01-3	ACH-000270	-1.964	CABAZITAXEL	2.5	HPAC_PANCREAS	Female	PANCREAS	Pancreas	Pancreatic Carcinoma	Pancreatic adenocarcinoma	0	WT	3.52223	3.4982	3.96955	4.09816	NA	4.71169	NA	High	High	High_High
BRD:BRD-K06858286-001-01-3	ACH-000273	-3.77415	CABAZITAXEL	2.5	SF539_CENTRAL_NERVOUS_SYSTEM	Female	CENTRAL_NERVOUS_SYSTEM	Central Nervous System	Glioblastoma	NA	0	WT	2.64652	4.02338	5.11384	4.0536	NA	2.89057	NA	Low	Low	Low_Low
BRD:BRD-K06858286-001-01-3	ACH-000274	0.343719	CABAZITAXEL	2.5	HS852T_SKIN	Unknown	SKIN	NA	NA	NA	0	WT	3.01193	4.44475	4.50603	3.29827	NA	NA	NA	Low	NA	Low_NA
BRD:BRD-K06858286-001-01-3	ACH-000276	-1.5332	CABAZITAXEL	2.5	HCC38_BREAST	Female	BREAST	Breast	Breast Carcinoma	Ductal Breast Carcinoma	2	Mutant	3.37759	5.11484	5.33533	4.3315	3.1085	4.71238	NA	Low	High	Low_High
BRD:BRD-K06858286-001-01-3	ACH-000277	-1.11707	CABAZITAXEL	2.5	HCC1419_BREAST	Female	BREAST	Breast	Breast Carcinoma	Ductal Breast Carcinoma	1	Mutant	4.07747	4.1419	3.98431	3.1202	NA	3.27915	NA	High	Low	High_Low
BRD:BRD-K06858286-001-01-3	ACH-000278	-2.39284	CABAZITAXEL	2.5	COV362_OVARY	Female	OVARY	NA	NA	NA	2	Mutant	2.93007	5.92095	4.25427	2.48943	NA	NA	NA	Low	NA	Low_NA
BRD:BRD-K06858286-001-01-3	ACH-000279	-2.53464	CABAZITAXEL	2.5	EWS502_BONE	Unknown	BONE	NA	NA	NA	2	Mutant	3.99206	6.72125	4.87304	4.58394	NA	NA	NA	High	NA	High_NA
BRD:BRD-K06858286-001-01-3	ACH-000280	-3.73114	CABAZITAXEL	2.5	SNU840_OVARY	Female	OVARY	NA	NA	NA	0	WT	3.23038	4.01126	4.67911	4.03611	NA	NA	NA	Low	NA	Low_NA
BRD:BRD-K06858286-001-01-3	ACH-000281	-1.54698	CABAZITAXEL	2.5	KP2_PANCREAS	Female	PANCREAS	Pancreas	Pancreatic Carcinoma	NA	2	Mutant	3.59583	5.23236	4.17145	5.12665	NA	3.80566	NA	High	High	High_High
BRD:BRD-K06858286-001-01-3	ACH-000288	-3.93883	CABAZITAXEL	2.5	BT549_BREAST	Female	BREAST	Breast	Breast Carcinoma	Invasive Ductal Carcinoma of No Special Type	2	Mutant	2.97938	7.04794	4.53751	4.57153	4.05182	3.87587	NA	Low	Low	Low_Low
BRD:BRD-K06858286-001-01-3	ACH-000289	0.844867	CABAZITAXEL	2.5	SNU466_CENTRAL_NERVOUS_SYSTEM	Unknown	CENTRAL_NERVOUS_SYSTEM	NA	NA	NA	0	WT	3.38287	5.30944	4.11934	2.7971	NA	NA	NA	High	NA	High_NA
BRD:BRD-K06858286-001-01-3	ACH-000291	-1.43181	CABAZITAXEL	2.5	NA	Female	NA	Ovary	Ovarian Carcinoma	Ovarian adenocarcinoma	2	Mutant	3.21718	4.91098	3.47708	3.81843	NA	3.03941	NA	Low	Low	Low_Low
BRD:BRD-K06858286-001-01-3	ACH-000292	-3.85991	CABAZITAXEL	2.5	NCIH841_LUNG	Unknown	LUNG	NA	NA	NA	2	Mutant	3.56124	7.14276	5.47274	5.21352	NA	NA	NA	High	NA	High_NA
BRD:BRD-K06858286-001-01-3	ACH-000296	-1.60285	CABAZITAXEL	2.5	OUMS23_LARGE_INTESTINE	Unknown	LARGE_INTESTINE	NA	NA	NA	2	Mutant	3.51262	6.01689	4.77458	5.33248	NA	NA	NA	Low	NA	Low_NA
BRD:BRD-K06858286-001-01-3	ACH-000302	-0.745052	CABAZITAXEL	2.5	SNU1077_ENDOMETRIUM	Female	ENDOMETRIUM	NA	NA	NA	2	Mutant	3.08142	5.0518	4.05606	3.75967	NA	NA	NA	Low	NA	Low_NA
BRD:BRD-K06858286-001-01-3	ACH-000305	-1.7836	CABAZITAXEL	2.5	ECGI10_OESOPHAGUS	Male	OESOPHAGUS	Esophagus	Esophageal Carcinoma	Esophageal Squamous Cell Carcinoma	2	Mutant	2.91205	6.45621	4.78038	3.22147	4.06244	3.84001	NA	Low	Low	Low_Low
BRD:BRD-K06858286-001-01-3	ACH-000307	-2.86462	CABAZITAXEL	2.5	PK1_PANCREAS	Unknown	PANCREAS	NA	NA	NA	2	Mutant	3.05204	4.98599	5.1053	4.02729	NA	NA	NA	Low	NA	Low_NA
BRD:BRD-K06858286-001-01-3	ACH-000308	-0.457065	CABAZITAXEL	2.5	EFO21_OVARY	Female	OVARY	Ovary	Ovarian Carcinoma	Ovarian Cystadenocarcinoma	0	WT	3.13848	7.03288	4.45485	5.56959	3.90798	4.42694	1.77425	Low	High	Low_High
BRD:BRD-K06858286-001-01-3	ACH-000309	-1.4597	CABAZITAXEL	2.5	SKLU1_LUNG	Female	LUNG	Lung	Non-Small Cell Lung Carcinoma	Lung Adenocarcinoma	2	Mutant	NA	NA	NA	NA	NA	5.17448	NA	NA	High	NA_High
BRD:BRD-K06858286-001-01-3	ACH-000311	-4.62448	CABAZITAXEL	2.5	NCIH2122_LUNG	Female	LUNG	Lung	Non-Small Cell Lung Carcinoma	Lung Adenocarcinoma	1	Mutant	3.32101	5.04962	3.41655	3.44648	-1.23094	3.66073	NA	Low	Low	Low_Low
BRD:BRD-K06858286-001-01-3	ACH-000312	-1.82519	CABAZITAXEL	2.5	SKNBE2_AUTONOMIC_GANGLIA	Unknown	AUTONOMIC_GANGLIA	NA	NA	NA	2	Mutant	3.99727	6.07306	5.39663	3.8925	NA	NA	NA	High	NA	High_NA
BRD:BRD-K06858286-001-01-3	ACH-000313	-2.03951	CABAZITAXEL	2.5	KMRC3_KIDNEY	Unknown	KIDNEY	NA	NA	NA	1	Mutant	3.71508	5.36485	5.38534	3.85442	NA	NA	NA	High	NA	High_NA
BRD:BRD-K06858286-001-01-3	ACH-000316	-3.53545	CABAZITAXEL	2.5	SNU886_LIVER	Unknown	LIVER	NA	NA	NA	0	WT	3.51623	1.51731	5.11925	3.55085	NA	NA	NA	Low	NA	Low_NA
BRD:BRD-K06858286-001-01-3	ACH-000318	-0.715967	CABAZITAXEL	2.5	TE10_OESOPHAGUS	Male	OESOPHAGUS	Esophagus	Esophageal Carcinoma	Esophageal Squamous Cell Carcinoma	2	Mutant	3.51382	4.83101	4.13863	2.83756	3.2845	4.38894	NA	High	High	High_High
BRD:BRD-K06858286-001-01-3	ACH-000319	0.14882	CABAZITAXEL	2.5	MPP89_PLEURA	Male	PLEURA	Lung	Mesothelioma	Pleural Epithelioid Mesothelioma	0	WT	3.29608	1.98805	4.52214	2.90273	NA	4.00016	NA	High	Low	High_Low
BRD:BRD-K06858286-001-01-3	ACH-000320	-3.6578	CABAZITAXEL	2.5	PSN1_PANCREAS	Male	PANCREAS	Pancreas	Pancreatic Carcinoma	Pancreatic adenocarcinoma	2	Mutant	4.29405	3.66145	4.9757	4.04488	2.47997	4.0774	NA	High	High	High_High
BRD:BRD-K06858286-001-01-3	ACH-000322	-1.65154	CABAZITAXEL	2.5	HT144_SKIN	Male	SKIN	Skin	Melanoma	NA	0	WT	3.37495	5.36025	4.30861	3.04384	NA	4.18221	NA	Low	High	Low_High
BRD:BRD-K06858286-001-01-3	ACH-000323	-2.55866	CABAZITAXEL	2.5	42MGBA_CENTRAL_NERVOUS_SYSTEM	Male	CENTRAL_NERVOUS_SYSTEM	Central Nervous System	Glioblastoma	NA	2	Mutant	2.93722	4.95384	5.42211	4.17883	NA	3.92478	NA	Low	Low	Low_Low
BRD:BRD-K06858286-001-01-3	ACH-000324	-1.86651	CABAZITAXEL	2.5	JHOC5_OVARY	Female	OVARY	NA	NA	NA	0	WT	2.3358	4.96079	4.08077	4.14477	NA	NA	NA	Low	NA	Low_NA
BRD:BRD-K06858286-001-01-3	ACH-000329	-3.55709	CABAZITAXEL	2.5	CCFSTTG1_CENTRAL_NERVOUS_SYSTEM	Unknown	CENTRAL_NERVOUS_SYSTEM	NA	NA	NA	0	WT	3.20237	4.48144	4.77361	4.15539	NA	NA	NA	Low	NA	Low_NA
BRD:BRD-K06858286-001-01-3	ACH-000330	-2.27606	CABAZITAXEL	2.5	EFM19_BREAST	Female	BREAST	Breast	Breast Carcinoma	Ductal Breast Carcinoma	2	Mutant	4.30465	5.10059	4.41238	3.53636	NA	4.34296	NA	High	High	High_High
BRD:BRD-K06858286-001-01-3	ACH-000331	-0.378895	CABAZITAXEL	2.5	ISTMES2_PLEURA	Unknown	PLEURA	NA	NA	NA	2	Mutant	3.15548	5.18055	4.95949	3.46183	NA	NA	NA	Low	NA	Low_NA
BRD:BRD-K06858286-001-01-3	ACH-000332	0.4551	CABAZITAXEL	2.5	YAPC_PANCREAS	Male	PANCREAS	Pancreas	Pancreatic Carcinoma	NA	2	Mutant	3.8921	5.93068	4.48447	5.61608	2.16123	4.36624	1.49758	High	High	High_High
BRD:BRD-K06858286-001-01-3	ACH-000335	-3.81317	CABAZITAXEL	2.5	MSTO211H_PLEURA	Male	PLEURA	Lung	Mesothelioma	Pleural Biphasic Mesothelioma	0	WT	3.16008	4.83101	4.59967	4.31836	NA	3.81144	0.60081	High	Low	High_Low
BRD:BRD-K06858286-001-01-3	ACH-000343	-1.43913	CABAZITAXEL	2.5	NCIH522_LUNG	Male	LUNG	Lung	Non-Small Cell Lung Carcinoma	Lung Adenocarcinoma	0	WT	4.63219	1.77681	5.17493	4.70517	NA	3.85626	NA	High	Low	High_Low
BRD:BRD-K06858286-001-01-3	ACH-000344	-0.592874	CABAZITAXEL	2.5	SNU668_STOMACH	Unknown	STOMACH	NA	NA	NA	2	Mutant	3.80575	4.52715	3.99246	3.61557	NA	NA	NA	High	NA	High_NA
BRD:BRD-K06858286-001-01-3	ACH-000347	-0.241511	CABAZITAXEL	2.5	QGP1_PANCREAS	Male	PANCREAS	Pancreas	Other Solid Carcinomas	Pancreatic somatostatinoma	0	WT	4.18821	3.63376	5.83771	4.02552	NA	5.81586	NA	High	High	High_High
BRD:BRD-K06858286-001-01-3	ACH-000348	-2.38724	CABAZITAXEL	2.5	RPMI7951_SKIN	Female	SKIN	Skin	Melanoma	NA	0	WT	3.83413	3.39179	5.17158	4.11747	NA	3.964	NA	High	High	High_High
BRD:BRD-K06858286-001-01-3	ACH-000350	1.43525	CABAZITAXEL	2.5	COLO678_LARGE_INTESTINE	Male	LARGE_INTESTINE	Large Intestine	Colorectal Carcinoma	NA	0	WT	3.1979	5.65674	4.99173	3.2274	NA	4.43883	NA	Low	High	Low_High
BRD:BRD-K06858286-001-01-3	ACH-000351	-1.52305	CABAZITAXEL	2.5	MKN1_STOMACH	Unknown	STOMACH	NA	NA	NA	2	Mutant	3.67567	6.23888	4.04669	4.32202	NA	NA	NA	Low	NA	Low_NA
BRD:BRD-K06858286-001-01-3	ACH-000352	-0.836678	CABAZITAXEL	2.5	HCC1428_BREAST	Female	BREAST	Breast	Breast Carcinoma	Breast adenocarcinoma	0	WT	3.93344	6.3973	3.9513	4.21921	NA	3.48564	NA	High	Low	High_Low
BRD:BRD-K06858286-001-01-3	ACH-000356	-3.23908	CABAZITAXEL	2.5	MKN45_STOMACH	Female	STOMACH	Stomach	Gastric Carcinoma	Gastric adenocarcinoma	1	Mutant	4.28051	5.45765	3.9679	4.08544	NA	3.31351	NA	High	Low	High_Low
BRD:BRD-K06858286-001-01-3	ACH-000359	-1.35231	CABAZITAXEL	2.5	MG63_BONE	Male	BONE	Bone	Osteosarcoma	NA	0	WT	2.25873	2.22547	4.82085	3.84052	NA	4.12352	NA	Low	High	Low_High
BRD:BRD-K06858286-001-01-3	ACH-000361	-2.989	CABAZITAXEL	2.5	SKHEP1_LIVER	Male	LIVER	Liver	Hepatocellular Carcinoma	NA	0	WT	3.04377	5.63977	4.40188	3.76492	NA	4.57757	NA	Low	High	Low_High
BRD:BRD-K06858286-001-01-3	ACH-000364	-2.61731	CABAZITAXEL	2.5	U2OS_BONE	Female	BONE	Bone	Osteosarcoma	NA	0	WT	3.93163	4.75982	4.99299	4.9525	NA	3.96255	NA	Low	Low	Low_Low
BRD:BRD-K06858286-001-01-3	ACH-000366	-1.60306	CABAZITAXEL	2.5	SKNDZ_AUTONOMIC_GANGLIA	Female	AUTONOMIC_GANGLIA	Peripheral Nervous System	Neuroblastoma	NA	2	Mutant	3.96924	6.96268	5.49518	3.82146	3.78907	4.65571	NA	High	Low	High_Low
BRD:BRD-K06858286-001-01-3	ACH-000367	-1.19432	CABAZITAXEL	2.5	NCIH226_LUNG	Male	LUNG	Lung	Mesothelioma	Pleural Epithelioid Mesothelioma	0	WT	2.45427	6.30646	2.86194	3.53029	NA	2.8974	NA	Low	Low	Low_Low
BRD:BRD-K06858286-001-01-3	ACH-000368	-3.59501	CABAZITAXEL	2.5	SNU1105_CENTRAL_NERVOUS_SYSTEM	Unknown	CENTRAL_NERVOUS_SYSTEM	NA	NA	NA	2	Mutant	2.36501	5.25267	4.81991	3.83853	NA	NA	NA	Low	NA	Low_NA
BRD:BRD-K06858286-001-01-3	ACH-000374	-3.0085	CABAZITAXEL	2.5	HCC1143_BREAST	Female	BREAST	Breast	Breast Carcinoma	Ductal Breast Carcinoma	2	Mutant	3.22892	7.30122	4.80622	2.69004	4.70194	4.09901	NA	Low	High	Low_High
BRD:BRD-K06858286-001-01-3	ACH-000375	-3.32568	CABAZITAXEL	2.5	G402_SOFT_TISSUE	Female	SOFT_TISSUE	Soft Tissue	Other Sarcomas	Epithelioid Cell Type Gastrointestinal Stromal Tumor	0	WT	3.546	5.64418	5.02412	4.33223	NA	4.41025	NA	Low	Low	Low_Low
BRD:BRD-K06858286-001-01-3	ACH-000376	-1.33245	CABAZITAXEL	2.5	SF295_CENTRAL_NERVOUS_SYSTEM	Female	CENTRAL_NERVOUS_SYSTEM	Central Nervous System	Glioblastoma	NA	2	Mutant	3.02206	5.47745	4.36678	4.17883	4.06302	3.92227	NA	Low	Low	Low_Low
BRD:BRD-K06858286-001-01-3	ACH-000378	-1.8225	CABAZITAXEL	2.5	NCIH647_LUNG	Male	LUNG	Lung	Non-Small Cell Lung Carcinoma	Adenosquamous lung carcinoma	0	WT	3.24492	5.52994	4.04747	4.59503	NA	3.59194	NA	Low	Low	Low_Low
BRD:BRD-K06858286-001-01-3	ACH-000383	-0.542417	CABAZITAXEL	2.5	OE33_OESOPHAGUS	Female	OESOPHAGUS	Esophagus	Esophageal Carcinoma	Barrett Adenocarcinoma	2	Mutant	3.59355	4.68841	3.78386	3.80011	NA	4.05444	NA	High	Low	High_Low
BRD:BRD-K06858286-001-01-3	ACH-000384	-2.23977	CABAZITAXEL	2.5	SW780_URINARY_TRACT	Female	URINARY_TRACT	Bladder	Bladder Carcinoma	NA	0	WT	4.48032	5.54412	6.00031	4.05707	NA	4.25563	NA	High	High	High_High
BRD:BRD-K06858286-001-01-3	ACH-000389	-4.04653	CABAZITAXEL	2.5	H4_CENTRAL_NERVOUS_SYSTEM	Male	CENTRAL_NERVOUS_SYSTEM	Central Nervous System	Glioma	Low Grade Glioma	0	WT	3.16772	5.58555	5.43061	4.61515	NA	4.39757	NA	Low	High	Low_High
BRD:BRD-K06858286-001-01-3	ACH-000390	-2.40779	CABAZITAXEL	2.5	LUDLU1_LUNG	Unknown	LUNG	NA	NA	NA	2	Mutant	3.50415	5.34386	4.6051	4.70745	NA	NA	NA	High	NA	High_NA
BRD:BRD-K06858286-001-01-3	ACH-000391	-2.03229	CABAZITAXEL	2.5	MHHES1_BONE	Male	BONE	Bone	Ewing's Sarcoma	NA	0	WT	3.66266	6.1323	4.57611	5.54048	2.63306	4.04674	NA	Low	High	Low_High
BRD:BRD-K06858286-001-01-3	ACH-000393	-1.004	CABAZITAXEL	2.5	HLF_LIVER	Unknown	LIVER	NA	NA	NA	2	Mutant	2.91928	5.26857	4.31124	4.71201	NA	NA	NA	Low	NA	Low_NA
BRD:BRD-K06858286-001-01-3	ACH-000395	-2.40812	CABAZITAXEL	2.5	NCIH520_LUNG	Male	LUNG	Lung	Non-Small Cell Lung Carcinoma	Squamous Cell Lung Carcinoma	2	Mutant	4.21913	3.16402	4.44163	7.4675	NA	3.71257	NA	High	Low	High_Low
BRD:BRD-K06858286-001-01-3	ACH-000396	-2.53589	CABAZITAXEL	2.5	J82_URINARY_TRACT	Male	URINARY_TRACT	Bladder	Bladder Carcinoma	NA	1	Mutant	2.45674	4.25545	4.67187	2.64334	NA	3.49803	NA	Low	Low	Low_Low
BRD:BRD-K06858286-001-01-3	ACH-000397	-0.238136	CABAZITAXEL	2.5	TEN_ENDOMETRIUM	Female	ENDOMETRIUM	NA	NA	NA	2	Mutant	4.05845	3.38389	5.15018	4.87041	NA	NA	NA	High	NA	High_NA
BRD:BRD-K06858286-001-01-3	ACH-000401	-2.95269	CABAZITAXEL	2.5	COLO800_SKIN	Male	SKIN	Skin	Melanoma	Cutaneous melanoma	2	Mutant	2.92109	6.00332	4.64361	3.38621	NA	3.77155	NA	Low	High	Low_High
BRD:BRD-K06858286-001-01-3	ACH-000403	-3.82771	CABAZITAXEL	2.5	NCIH747_LARGE_INTESTINE	Male	LARGE_INTESTINE	Large Intestine	Colorectal Carcinoma	Cecum adenocarcinoma	2	Mutant	3.44602	6.03713	3.56141	4.28651	2.92282	3.8096	NA	Low	Low	Low_Low
BRD:BRD-K06858286-001-01-3	ACH-000404	-0.37128	CABAZITAXEL	2.5	K029AX_SKIN	Unknown	SKIN	NA	NA	NA	0	WT	3.17381	4.50415	4.73979	4.09816	NA	NA	NA	Low	NA	Low_NA
BRD:BRD-K06858286-001-01-3	ACH-000407	-2.38433	CABAZITAXEL	2.5	SNU685_ENDOMETRIUM	Female	ENDOMETRIUM	NA	NA	NA	0	WT	3.2636	4.06505	4.50718	4.3844	NA	NA	NA	Low	NA	Low_NA
BRD:BRD-K06858286-001-01-3	ACH-000408	-2.4862	CABAZITAXEL	2.5	TE5_OESOPHAGUS	Female	OESOPHAGUS	Esophagus	Esophageal Carcinoma	Esophageal Squamous Cell Carcinoma	2	Mutant	4.33117	4.8703	4.16928	5.45185	3.18719	3.44245	NA	High	Low	High_Low
BRD:BRD-K06858286-001-01-3	ACH-000411	-1.90821	CABAZITAXEL	2.5	769P_KIDNEY	Female	KIDNEY	Kidney	Kidney Carcinoma	Clear Cell Renal Cell Carcinoma	0	WT	2.18039	5.26593	4.09221	2.26727	NA	3.67798	NA	Low	Low	Low_Low
BRD:BRD-K06858286-001-01-3	ACH-000414	-4.32767	CABAZITAXEL	2.5	NCIH1944_LUNG	Female	LUNG	Lung	Non-Small Cell Lung Carcinoma	Lung Adenocarcinoma	0	WT	3.17533	4.37473	3.29544	3.58296	NA	3.0982	NA	Low	Low	Low_Low
BRD:BRD-K06858286-001-01-3	ACH-000415	-2.3643	CABAZITAXEL	2.5	BICR6_UPPER_AERODIGESTIVE_TRACT	Unknown	UPPER_AERODIGESTIVE_TRACT	NA	NA	NA	2	Mutant	1.74287	1.47092	1.88913	1.97518	NA	NA	NA	Low	NA	Low_NA
BRD:BRD-K06858286-001-01-3	ACH-000416	-3.23864	CABAZITAXEL	2.5	NCIH838_LUNG	Male	LUNG	Lung	Non-Small Cell Lung Carcinoma	Lung Adenocarcinoma	2	Mutant	2.46659	3.19277	3.94713	4.11747	NA	5.18992	NA	Low	High	Low_High
BRD:BRD-K06858286-001-01-3	ACH-000417	-1.23165	CABAZITAXEL	2.5	PANC0813_PANCREAS	Male	PANCREAS	Pancreas	Pancreatic Carcinoma	Pancreatic ductal adenocarcinoma	0	WT	3.33468	6.49267	4.5964	4.07775	NA	3.89698	NA	Low	High	Low_High
BRD:BRD-K06858286-001-01-3	ACH-000418	-2.07892	CABAZITAXEL	2.5	SW1353_BONE	Unknown	BONE	NA	NA	NA	0	WT	3.26217	4.95569	5.00801	5.22951	NA	NA	NA	Low	NA	Low_NA
BRD:BRD-K06858286-001-01-3	ACH-000420	-2.36942	CABAZITAXEL	2.5	SNU449_LIVER	Male	LIVER	Liver	Hepatocellular Carcinoma	NA	2	Mutant	3.00854	5.41214	4.70975	4.09816	2.12237	3.59821	NA	Low	Low	Low_Low
BRD:BRD-K06858286-001-01-3	ACH-000421	-1.85171	CABAZITAXEL	2.5	SW837_LARGE_INTESTINE	Male	LARGE_INTESTINE	Large Intestine	Colorectal Carcinoma	Rectal adenocarcinoma	2	Mutant	4.0358	6.00148	5.24363	5.59301	3.01892	4.28851	1.97672	High	High	High_High
BRD:BRD-K06858286-001-01-3	ACH-000423	-0.940479	CABAZITAXEL	2.5	SKMEL3_SKIN	Female	SKIN	Skin	Melanoma	Cutaneous melanoma	2	Mutant	3.52821	5.16893	4.49558	4.04313	3.34951	3.47774	NA	High	Low	High_Low
BRD:BRD-K06858286-001-01-3	ACH-000425	-3.17888	CABAZITAXEL	2.5	UACC62_SKIN	Unknown	SKIN	Skin	Melanoma	NA	0	WT	2.67448	3.83531	4.14965	3.69204	NA	3.48894	NA	Low	Low	Low_Low
BRD:BRD-K06858286-001-01-3	ACH-000427	0.176046	CABAZITAXEL	2.5	NCIN87_STOMACH	Male	STOMACH	Stomach	Gastric Carcinoma	Gastric tubular adenocarcinoma	2	Mutant	3.47723	5.4008	4.52443	4.24402	4.14384	3.81968	NA	Low	High	Low_High
BRD:BRD-K06858286-001-01-3	ACH-000428	-1.83317	CABAZITAXEL	2.5	UO31_KIDNEY	Female	KIDNEY	Kidney	Kidney Carcinoma	NA	0	WT	2.76336	6.28554	3.5668	4.11664	NA	3.45979	NA	Low	Low	Low_Low
BRD:BRD-K06858286-001-01-3	ACH-000429	0.0726077	CABAZITAXEL	2.5	A704_KIDNEY	Male	KIDNEY	Kidney	Kidney Carcinoma	NA	0	WT	4.53792	3.48715	3.57002	3.31514	NA	4.04275	NA	High	High	High_High
BRD:BRD-K06858286-001-01-3	ACH-000430	-2.89404	CABAZITAXEL	2.5	TYKNU_OVARY	Female	OVARY	Ovary	Ovarian Carcinoma	High grade ovarian serous adenocarcinoma	2	Mutant	3.08465	4.75028	4.43498	4.20429	2.55307	4.29133	2.11942	Low	High	Low_High
BRD:BRD-K06858286-001-01-3	ACH-000433	0.721355	CABAZITAXEL	2.5	CAKI1_KIDNEY	Male	KIDNEY	Kidney	Kidney Carcinoma	Clear cell renal cell carcinoma	0	WT	2.36764	4.16012	3.74993	2.71905	NA	4.64807	NA	Low	High	Low_High
BRD:BRD-K06858286-001-01-3	ACH-000434	-0.765706	CABAZITAXEL	2.5	NCIH1915_LUNG	Female	LUNG	Lung	Non-Small Cell Lung Carcinoma	NA	0	WT	2.98802	2.97028	3.78479	4.46451	NA	4.04027	1.03288	Low	High	Low_High
BRD:BRD-K06858286-001-01-3	ACH-000435	-3.05599	CABAZITAXEL	2.5	EFE184_ENDOMETRIUM	Female	ENDOMETRIUM	NA	NA	NA	2	Mutant	2.11954	5.38206	2.73329	3.28264	NA	NA	NA	Low	NA	Low_NA
BRD:BRD-K06858286-001-01-3	ACH-000437	-1.24893	CABAZITAXEL	2.5	SW1088_CENTRAL_NERVOUS_SYSTEM	Male	CENTRAL_NERVOUS_SYSTEM	Central Nervous System	Glioma	Low Grade Glioma	2	Mutant	3.65173	5.70708	4.94268	4.41501	4.08575	3.61506	NA	High	Low	High_Low
BRD:BRD-K06858286-001-01-3	ACH-000441	-0.505218	CABAZITAXEL	2.5	SH4_SKIN	Female	SKIN	Skin	Melanoma	NA	0	WT	3.60379	3.99991	4.58052	3.57706	NA	4.3888	NA	High	High	High_High
BRD:BRD-K06858286-001-01-3	ACH-000443	-1.68208	CABAZITAXEL	2.5	OVKATE_OVARY	Female	OVARY	Ovary	Ovarian Carcinoma	High grade ovarian serous adenocarcinoma	2	Mutant	3.04543	4.77192	5.11384	3.87504	NA	4.44498	NA	Low	High	Low_High
BRD:BRD-K06858286-001-01-3	ACH-000444	-2.52494	CABAZITAXEL	2.5	LU99_LUNG	Unknown	LUNG	NA	NA	NA	0	WT	3.00684	4.04648	5.14716	3.34972	NA	NA	NA	Low	NA	Low_NA
BRD:BRD-K06858286-001-01-3	ACH-000445	-4.08832	CABAZITAXEL	2.5	KNS60_CENTRAL_NERVOUS_SYSTEM	Unknown	CENTRAL_NERVOUS_SYSTEM	NA	NA	NA	2	Mutant	3.6681	6.34006	4.99383	4.44369	NA	NA	NA	High	NA	High_NA
BRD:BRD-K06858286-001-01-3	ACH-000446	-1.56147	CABAZITAXEL	2.5	NA	Unknown	NA	NA	NA	NA	0	WT	3.31137	5.73108	4.73532	3.37549	NA	NA	NA	Low	NA	Low_NA
BRD:BRD-K06858286-001-01-3	ACH-000447	0.0404816	CABAZITAXEL	2.5	NCIH2228_LUNG	Female	LUNG	Lung	Non-Small Cell Lung Carcinoma	Lung Adenocarcinoma	2	Mutant	3.1859	3.40356	4.54091	5.19277	NA	4.29162	NA	Low	High	Low_High
BRD:BRD-K06858286-001-01-3	ACH-000449	-1.66509	CABAZITAXEL	2.5	MESSA_SOFT_TISSUE	Female	SOFT_TISSUE	Soft Tissue	Other Sarcomas	Uterine Corpus Sarcoma	0	WT	3.24636	6.14623	5.66202	3.85541	NA	5.12099	NA	Low	High	Low_High
BRD:BRD-K06858286-001-01-3	ACH-000450	-2.33453	CABAZITAXEL	2.5	MELHO_SKIN	Female	SKIN	Skin	Melanoma	NA	0	WT	3.04377	3.91894	4.54091	3.14224	NA	3.89542	NA	Low	High	Low_High
BRD:BRD-K06858286-001-01-3	ACH-000452	0.096795	CABAZITAXEL	2.5	TE8_OESOPHAGUS	Male	OESOPHAGUS	Esophagus	Esophageal Carcinoma	Esophageal Squamous Cell Carcinoma	2	Mutant	3.25788	5.81245	5.64003	3.69423	2.31101	4.59538	NA	Low	High	Low_High
BRD:BRD-K06858286-001-01-3	ACH-000454	-0.759029	CABAZITAXEL	2.5	HCC95_LUNG	Unknown	LUNG	NA	NA	NA	0	WT	3.94877	4.12748	4.83349	5.24614	NA	NA	NA	High	NA	High_NA
BRD:BRD-K06858286-001-01-3	ACH-000456	-2.98792	CABAZITAXEL	2.5	BCPAP_THYROID	Female	THYROID	Thyroid	Thyroid Gland Carcinoma	Poorly differentiated thyroid gland carcinoma	2	Mutant	2.98284	6.08689	5.25637	4.52345	4.17263	4.30107	NA	Low	High	Low_High
BRD:BRD-K06858286-001-01-3	ACH-000457	-0.0839716	CABAZITAXEL	2.5	CAL54_KIDNEY	Male	KIDNEY	Kidney	Kidney Carcinoma	NA	0	WT	3.71927	6.12975	4.92567	3.06041	NA	5.21837	NA	High	High	High_High
BRD:BRD-K06858286-001-01-3	ACH-000458	-3.96413	CABAZITAXEL	2.5	CJM_SKIN	Unknown	SKIN	NA	NA	NA	2	Mutant	2.20989	5.0422	4.58821	1.9982	NA	NA	NA	Low	NA	Low_NA
BRD:BRD-K06858286-001-01-3	ACH-000461	-3.05697	CABAZITAXEL	2.5	SNU1196_BILIARY_TRACT	Unknown	BILIARY_TRACT	NA	NA	NA	2	Mutant	3.36698	7.25171	3.18331	2.446	NA	NA	NA	Low	NA	Low_NA
BRD:BRD-K06858286-001-01-3	ACH-000463	-4.34525	CABAZITAXEL	2.5	NCIH460_LUNG	Male	LUNG	Lung	Non-Small Cell Lung Carcinoma	Lung large cell carcinoma	0	WT	3.24492	4.68174	4.44765	4.07089	NA	3.9823	NA	Low	High	Low_High
BRD:BRD-K06858286-001-01-3	ACH-000464	-1.48952	CABAZITAXEL	2.5	CAS1_CENTRAL_NERVOUS_SYSTEM	Male	CENTRAL_NERVOUS_SYSTEM	Central Nervous System	Glioblastoma	NA	2	Mutant	2.50294	5.84796	4.32042	3.85245	4.37285	4.3438	NA	Low	High	Low_High
BRD:BRD-K06858286-001-01-3	ACH-000466	-1.03574	CABAZITAXEL	2.5	SNU216_STOMACH	Unknown	STOMACH	NA	NA	NA	2	Mutant	3.42057	6.44402	4.7057	4.41225	NA	NA	NA	Low	NA	Low_NA
BRD:BRD-K06858286-001-01-3	ACH-000467	-3.99107	CABAZITAXEL	2.5	HCC56_LARGE_INTESTINE	Unknown	LARGE_INTESTINE	NA	NA	NA	2	Mutant	3.09749	5.6715	5.97771	3.58766	NA	NA	NA	Low	NA	Low_NA
BRD:BRD-K06858286-001-01-3	ACH-000468	-2.13415	CABAZITAXEL	2.5	PK45H_PANCREAS	Unknown	PANCREAS	NA	NA	NA	0	WT	3.79845	5.97939	4.66191	4.64448	NA	NA	NA	High	NA	High_NA
BRD:BRD-K06858286-001-01-3	ACH-000469	-2.5581	CABAZITAXEL	2.5	YH13_CENTRAL_NERVOUS_SYSTEM	Male	CENTRAL_NERVOUS_SYSTEM	Central Nervous System	Glioblastoma	NA	2	Mutant	3.41414	4.68619	5.04493	4.38017	1.77071	4.48728	NA	High	High	High_High
BRD:BRD-K06858286-001-01-3	ACH-000470	-0.737489	CABAZITAXEL	2.5	SW1463_LARGE_INTESTINE	Female	LARGE_INTESTINE	Large Intestine	Colorectal Carcinoma	Rectal adenocarcinoma	2	Mutant	4.01452	5.24733	2.74259	3.2926	4.53223	3.16969	NA	High	Low	High_Low
BRD:BRD-K06858286-001-01-3	ACH-000471	-2.00317	CABAZITAXEL	2.5	LI7_LIVER	Unknown	LIVER	NA	NA	NA	0	WT	4.3961	2.72345	4.9496	4.76461	NA	NA	NA	High	NA	High_NA
BRD:BRD-K06858286-001-01-3	ACH-000472	-0.823647	CABAZITAXEL	2.5	HSC2_UPPER_AERODIGESTIVE_TRACT	Male	UPPER_AERODIGESTIVE_TRACT	Head and Neck	Head and Neck Carcinoma	Oral Cavity Squamous Cell Carcinoma	0	WT	2.39623	3.49942	3.56357	3.86034	NA	3.30734	NA	Low	Low	Low_Low
BRD:BRD-K06858286-001-01-3	ACH-000473	-3.31175	CABAZITAXEL	2.5	RT112_URINARY_TRACT	Female	URINARY_TRACT	Bladder	Bladder Carcinoma	NA	1	Mutant	3.71508	5.42577	4.43316	4.16594	2.21812	4.09127	NA	High	Low	High_Low
BRD:BRD-K06858286-001-01-3	ACH-000475	-1.33933	CABAZITAXEL	2.5	HUH1_LIVER	Male	LIVER	Liver	Hepatocellular Carcinoma	NA	2	Mutant	2.92289	5.09511	4.36361	3.26396	NA	3.72977	NA	Low	Low	Low_Low
BRD:BRD-K06858286-001-01-3	ACH-000476	-1.84342	CABAZITAXEL	2.5	JHH4_LIVER	Male	LIVER	Liver	Hepatocellular Carcinoma	NA	2	Mutant	3.40638	5.18693	4.96804	3.72031	NA	4.37314	NA	Low	High	Low_High
BRD:BRD-K06858286-001-01-3	ACH-000477	0.0110771	CABAZITAXEL	2.5	MALME3M_SKIN	Unknown	SKIN	NA	NA	NA	0	WT	3.5659	5.00855	4.69706	3.04883	NA	NA	NA	High	NA	High_NA
BRD:BRD-K06858286-001-01-3	ACH-000479	-0.888113	CABAZITAXEL	2.5	KNS81_CENTRAL_NERVOUS_SYSTEM	Unknown	CENTRAL_NERVOUS_SYSTEM	NA	NA	NA	0	WT	4.10433	6.35147	4.72084	4.35173	NA	NA	NA	High	NA	High_NA
BRD:BRD-K06858286-001-01-3	ACH-000480	-0.387588	CABAZITAXEL	2.5	HUH7_LIVER	Male	LIVER	Liver	Hepatocellular Carcinoma	NA	2	Mutant	4.11798	6.23354	3.93452	2.98789	NA	4.01214	NA	High	Low	High_Low
BRD:BRD-K06858286-001-01-3	ACH-000481	-3.52445	CABAZITAXEL	2.5	NCIH2170_LUNG	Male	LUNG	Lung	Non-Small Cell Lung Carcinoma	Squamous Cell Lung Carcinoma	2	Mutant	3.63407	5.31127	3.15676	4.0475	NA	3.22341	NA	High	Low	High_Low
BRD:BRD-K06858286-001-01-3	ACH-000482	-3.319	CABAZITAXEL	2.5	RERFLCKJ_LUNG	Male	LUNG	Lung	Non-Small Cell Lung Carcinoma	Lung Adenocarcinoma	0	WT	4.16052	3.90221	5.24647	3.44262	NA	4.78127	NA	High	High	High_High
BRD:BRD-K06858286-001-01-3	ACH-000483	-0.832371	CABAZITAXEL	2.5	SNU182_LIVER	Unknown	LIVER	NA	NA	NA	2	Mutant	3.29468	5.05831	4.30729	4.01218	NA	NA	NA	Low	NA	Low_NA
BRD:BRD-K06858286-001-01-3	ACH-000484	-2.05008	CABAZITAXEL	2.5	VMRCRCW_KIDNEY	Male	KIDNEY	Kidney	Kidney Carcinoma	NA	0	WT	5.30351	5.46692	4.47269	3.11862	NA	3.60782	NA	High	Low	High_Low
BRD:BRD-K06858286-001-01-3	ACH-000485	-3.34098	CABAZITAXEL	2.5	GSU_STOMACH	Unknown	STOMACH	NA	NA	NA	1	Mutant	3.31413	5.72248	3.75088	3.47197	NA	NA	NA	Low	NA	Low_NA
BRD:BRD-K06858286-001-01-3	ACH-000486	-1.49997	CABAZITAXEL	2.5	KU1919_URINARY_TRACT	Female	URINARY_TRACT	Bladder	Bladder Carcinoma	NA	0	WT	2.73296	4.38968	4.50718	2.77943	NA	4.9821	NA	Low	High	Low_High
BRD:BRD-K06858286-001-01-3	ACH-000488	-3.52334	CABAZITAXEL	2.5	TE11_OESOPHAGUS	Male	OESOPHAGUS	Esophagus	Esophageal Carcinoma	Esophageal Squamous Cell Carcinoma	2	Mutant	2.41921	5.27608	3.81704	3.47702	2.86937	4.47394	NA	Low	High	Low_High
BRD:BRD-K06858286-001-01-3	ACH-000489	0.707776	CABAZITAXEL	2.5	SW1116_LARGE_INTESTINE	Male	LARGE_INTESTINE	Large Intestine	Colorectal Carcinoma	Colon adenocarcinoma	2	Mutant	3.21275	5.75525	2.60492	3.45417	3.40858	3.10381	NA	Low	Low	Low_Low
BRD:BRD-K06858286-001-01-3	ACH-000493	-2.75276	CABAZITAXEL	2.5	SNU423_LIVER	Male	LIVER	Liver	Hepatocellular Carcinoma	NA	0	WT	3.28486	6.1675	4.08612	4.56904	NA	2.57759	1.54224	Low	Low	Low_Low
BRD:BRD-K06858286-001-01-3	ACH-000495	-3.17756	CABAZITAXEL	2.5	TUHR4TKB_KIDNEY	Unknown	KIDNEY	NA	NA	NA	0	WT	3.65721	4.82293	3.91756	4.12247	NA	NA	NA	High	NA	High_NA
BRD:BRD-K06858286-001-01-3	ACH-000496	-4.73773	CABAZITAXEL	2.5	NCIH1792_LUNG	Male	LUNG	Lung	Non-Small Cell Lung Carcinoma	Lung Adenocarcinoma	0	WT	3.68106	2.14642	4.81803	3.53515	NA	3.94075	NA	High	High	High_High
BRD:BRD-K06858286-001-01-3	ACH-000499	-2.29683	CABAZITAXEL	2.5	EW8_BONE	Unknown	BONE	NA	NA	NA	2	Mutant	3.79484	5.98028	4.81237	4.10238	NA	NA	NA	Low	NA	Low_NA
BRD:BRD-K06858286-001-01-3	ACH-000500	-5.06944	CABAZITAXEL	2.5	SNU46_UPPER_AERODIGESTIVE_TRACT	Unknown	UPPER_AERODIGESTIVE_TRACT	NA	NA	NA	2	Mutant	3.39598	6.32876	4.33344	4.73517	NA	NA	NA	High	NA	High_NA
BRD:BRD-K06858286-001-01-3	ACH-000502	-4.62174	CABAZITAXEL	2.5	TCCPAN2_PANCREAS	Unknown	PANCREAS	NA	NA	NA	0	WT	3.91154	2.185	3.90471	3.38488	NA	NA	NA	High	NA	High_NA
BRD:BRD-K06858286-001-01-3	ACH-000503	-3.0363	CABAZITAXEL	2.5	BICR16_UPPER_AERODIGESTIVE_TRACT	Unknown	UPPER_AERODIGESTIVE_TRACT	NA	NA	NA	2	Mutant	2.80099	2.78562	3.42365	3.33736	NA	NA	NA	Low	NA	Low_NA
BRD:BRD-K06858286-001-01-3	ACH-000504	-2.72022	CABAZITAXEL	2.5	SNB75_CENTRAL_NERVOUS_SYSTEM	Female	CENTRAL_NERVOUS_SYSTEM	Central Nervous System	Glioblastoma	NA	2	Mutant	3.19491	6.19885	4.53013	4.38861	NA	3.95648	NA	Low	Low	Low_Low
BRD:BRD-K06858286-001-01-3	ACH-000505	-2.70752	CABAZITAXEL	2.5	RKN_SOFT_TISSUE	Female	SOFT_TISSUE	Soft Tissue	Leiomyosarcoma	Ovarian Leiomyosarcoma	2	Mutant	3.1859	5.57423	5.50329	3.9069	0.51932	3.72856	NA	Low	Low	Low_Low
BRD:BRD-K06858286-001-01-3	ACH-000507	-4.27444	CABAZITAXEL	2.5	KE39_STOMACH	Unknown	STOMACH	NA	NA	NA	2	Mutant	3.96393	5.40183	4.03804	5.23561	NA	NA	NA	High	NA	High_NA
BRD:BRD-K06858286-001-01-3	ACH-000510	-2.5439	CABAZITAXEL	2.5	NCIH1299_LUNG	Male	LUNG	Lung	Non-Small Cell Lung Carcinoma	Lung large cell carcinoma	0	WT	2.78526	4.57031	4.49267	3.9521	NA	4.18868	NA	Low	High	Low_High
BRD:BRD-K06858286-001-01-3	ACH-000516	-1.31664	CABAZITAXEL	2.5	CAL78_BONE	Male	BONE	Bone	Chondrosarcoma	NA	0	WT	4.32354	5.49828	5.11152	4.38229	NA	3.7557	NA	High	Low	High_Low
BRD:BRD-K06858286-001-01-3	ACH-000517	0.952541	CABAZITAXEL	2.5	SNU410_PANCREAS	Unknown	PANCREAS	NA	NA	NA	2	Mutant	3.31716	4.98833	4.26528	4.08506	NA	NA	NA	Low	NA	Low_NA
BRD:BRD-K06858286-001-01-3	ACH-000518	-1.17697	CABAZITAXEL	2.5	CAL33_UPPER_AERODIGESTIVE_TRACT	Male	UPPER_AERODIGESTIVE_TRACT	Head and Neck	Head and Neck Carcinoma	Tongue Squamous Cell Carcinoma	2	Mutant	3.08948	5.88765	4.54711	5.19944	3.29483	3.34323	NA	High	Low	High_Low
BRD:BRD-K06858286-001-01-3	ACH-000521	-1.96006	CABAZITAXEL	2.5	NCIH2030_LUNG	Male	LUNG	Lung	Non-Small Cell Lung Carcinoma	Lung Adenocarcinoma	2	Mutant	3.52223	5.52899	5.6444	4.63979	1.82407	5.21584	NA	High	High	High_High
BRD:BRD-K06858286-001-01-3	ACH-000524	-1.78196	CABAZITAXEL	2.5	KURAMOCHI_OVARY	Female	OVARY	Ovary	Ovarian Carcinoma	High grade ovarian serous adenocarcinoma	2	Mutant	3.44602	6.80145	4.30663	4.75689	4.8391	3.8327	1.58398	High	Low	High_Low
BRD:BRD-K06858286-001-01-3	ACH-000527	-2.06722	CABAZITAXEL	2.5	OVISE_OVARY	Female	OVARY	Ovary	Ovarian Carcinoma	Ovarian clear cell adenocarcinoma	0	WT	3.19939	5.11234	4.19791	3.94092	NA	3.8125	NA	Low	Low	Low_Low
BRD:BRD-K06858286-001-01-3	ACH-000528	-2.73178	CABAZITAXEL	2.5	ABC1_LUNG	Male	LUNG	Lung	Non-Small Cell Lung Carcinoma	Lung Adenocarcinoma	2	Mutant	4.36534	6.44454	3.76416	4.88321	2.88178	3.84871	NA	High	Low	High_Low
BRD:BRD-K06858286-001-01-3	ACH-000530	-0.00811083	CABAZITAXEL	2.5	NA	Male	NA	Lung	Small Cell Lung Carcinoma	NA	2	Mutant	4.12436	3.27301	5.5297	3.85936	NA	5.13826	NA	High	High	High_High
BRD:BRD-K06858286-001-01-3	ACH-000532	-2.96685	CABAZITAXEL	2.5	SNU61_LARGE_INTESTINE	Male	LARGE_INTESTINE	Large Intestine	Colorectal Carcinoma	Rectal adenocarcinoma	2	Mutant	3.58182	5.94338	3.2779	4.23982	NA	4.09849	0.04254	Low	High	Low_High
BRD:BRD-K06858286-001-01-3	ACH-000533	-0.874331	CABAZITAXEL	2.5	NCIH2004RT_SOFT_TISSUE	Unknown	SOFT_TISSUE	NA	NA	NA	0	WT	2.47393	5.94756	4.28135	3.95581	NA	NA	NA	Low	NA	Low_NA
BRD:BRD-K06858286-001-01-3	ACH-000535	0.968539	CABAZITAXEL	2.5	BXPC3_PANCREAS	Female	PANCREAS	Pancreas	Pancreatic Carcinoma	Pancreatic ductal adenocarcinoma	2	Mutant	2.42427	6.0651	4.05528	4.5183	0.96498	3.38109	NA	Low	Low	Low_Low
BRD:BRD-K06858286-001-01-3	ACH-000537	-2.20008	CABAZITAXEL	2.5	SNU761_LIVER	Unknown	LIVER	NA	NA	NA	0	WT	2.93543	3.0662	5.05784	2.62164	NA	NA	NA	Low	NA	Low_NA
BRD:BRD-K06858286-001-01-3	ACH-000542	-0.545698	CABAZITAXEL	2.5	HEYA8_OVARY	Female	OVARY	NA	NA	NA	0	WT	2.48124	5.27908	3.04865	3.52541	NA	NA	NA	Low	NA	Low_NA
BRD:BRD-K06858286-001-01-3	ACH-000543	-2.3328	CABAZITAXEL	2.5	SNU489_CENTRAL_NERVOUS_SYSTEM	Unknown	CENTRAL_NERVOUS_SYSTEM	NA	NA	NA	0	WT	2.49814	4.45902	4.72984	3.87991	NA	NA	NA	Low	NA	Low_NA
BRD:BRD-K06858286-001-01-3	ACH-000544	-3.16988	CABAZITAXEL	2.5	OE21_OESOPHAGUS	Male	OESOPHAGUS	Esophagus	Esophageal Carcinoma	Esophageal Squamous Cell Carcinoma	0	WT	2.06577	1.72201	2.92239	2.5363	NA	3.67811	NA	Low	Low	Low_Low
BRD:BRD-K06858286-001-01-3	ACH-000545	-0.694678	CABAZITAXEL	2.5	VMCUB1_URINARY_TRACT	Unknown	URINARY_TRACT	NA	NA	NA	2	Mutant	4.27765	5.19486	5.10413	3.8164	NA	NA	NA	High	NA	High_NA
BRD:BRD-K06858286-001-01-3	ACH-000547	-2.63055	CABAZITAXEL	2.5	HT1197_URINARY_TRACT	Male	URINARY_TRACT	Bladder	Bladder Carcinoma	NA	0	WT	2.86601	5.32657	2.87389	4.45313	NA	3.40589	NA	Low	Low	Low_Low
BRD:BRD-K06858286-001-01-3	ACH-000548	-0.199395	CABAZITAXEL	2.5	BHY_UPPER_AERODIGESTIVE_TRACT	Male	UPPER_AERODIGESTIVE_TRACT	Head and Neck	Head and Neck Carcinoma	Head and Neck Squamous Cell Carcinoma	0	WT	3.34957	3.5803	4.67859	4.02906	NA	4.01614	NA	High	High	High_High
BRD:BRD-K06858286-001-01-3	ACH-000549	-3.26484	CABAZITAXEL	2.5	SNU1076_UPPER_AERODIGESTIVE_TRACT	Unknown	UPPER_AERODIGESTIVE_TRACT	NA	NA	NA	0	WT	3.16008	3.16707	4.37437	4.81282	NA	NA	NA	High	NA	High_NA
BRD:BRD-K06858286-001-01-3	ACH-000552	-4.74792	CABAZITAXEL	2.5	HT29_LARGE_INTESTINE	Female	LARGE_INTESTINE	Large Intestine	Colorectal Carcinoma	Colon adenocarcinoma	2	Mutant	4.02818	5.82966	4.71681	4.35818	4.38313	4.20714	NA	High	High	High_High
BRD:BRD-K06858286-001-01-3	ACH-000553	-2.06012	CABAZITAXEL	2.5	SQ1_LUNG	Unknown	LUNG	NA	NA	NA	0	WT	3.35227	3.32055	3.58922	4.29174	NA	NA	NA	Low	NA	Low_NA
BRD:BRD-K06858286-001-01-3	ACH-000555	-0.668028	CABAZITAXEL	2.5	A498_KIDNEY	Female	KIDNEY	Kidney	Kidney Carcinoma	NA	0	WT	3.509	5.52423	4.83022	2.57731	NA	4.69792	NA	High	High	High_High
BRD:BRD-K06858286-001-01-3	ACH-000558	-1.52631	CABAZITAXEL	2.5	A172_CENTRAL_NERVOUS_SYSTEM	Male	CENTRAL_NERVOUS_SYSTEM	Central Nervous System	Glioblastoma	NA	0	WT	3.93072	6.30834	4.68785	3.0637	NA	4.61061	NA	High	High	High_High
BRD:BRD-K06858286-001-01-3	ACH-000561	-3.44377	CABAZITAXEL	2.5	TT_OESOPHAGUS	Male	OESOPHAGUS	Esophagus	Esophageal Carcinoma	Esophageal Squamous Cell Carcinoma	1	Mutant	3.8865	4.75452	5.06625	3.41533	2.97113	4.67734	NA	High	High	High_High
BRD:BRD-K06858286-001-01-3	ACH-000562	0.68572	CABAZITAXEL	2.5	HCC78_LUNG	Male	LUNG	Lung	Non-Small Cell Lung Carcinoma	Lung Adenocarcinoma	2	Mutant	2.66379	4.24283	4.43437	3.9632	2.90207	4.38087	2.09297	Low	High	Low_High
BRD:BRD-K06858286-001-01-3	ACH-000563	-3.15917	CABAZITAXEL	2.5	EBC1_LUNG	Male	LUNG	Lung	Non-Small Cell Lung Carcinoma	Squamous Cell Lung Carcinoma	2	Mutant	3.14158	2.70283	4.00539	3.67327	NA	3.62261	NA	Low	Low	Low_Low
BRD:BRD-K06858286-001-01-3	ACH-000565	-3.02243	CABAZITAXEL	2.5	RCM1_LARGE_INTESTINE	Female	LARGE_INTESTINE	Large Intestine	Colorectal Carcinoma	Rectal adenocarcinoma	2	Mutant	3.40638	2.92441	4.21061	3.1547	NA	4.09352	NA	Low	High	Low_High
BRD:BRD-K06858286-001-01-3	ACH-000566	-3.54655	CABAZITAXEL	2.5	SW1710_URINARY_TRACT	Female	URINARY_TRACT	Bladder	Bladder Carcinoma	NA	2	Mutant	3.3855	5.3392	4.57223	3.74701	4.14516	3.28443	NA	High	Low	High_Low
BRD:BRD-K06858286-001-01-3	ACH-000569	-3.89163	CABAZITAXEL	2.5	ISTMES1_PLEURA	Female	PLEURA	Lung	Mesothelioma	Pleural Epithelioid Mesothelioma	0	WT	2.77336	6.39232	3.63205	3.57942	NA	3.32483	NA	Low	Low	Low_Low
BRD:BRD-K06858286-001-01-3	ACH-000570	-3.14971	CABAZITAXEL	2.5	YKG1_CENTRAL_NERVOUS_SYSTEM	Female	CENTRAL_NERVOUS_SYSTEM	Central Nervous System	Glioblastoma	NA	0	WT	3.59355	6.73338	5.56114	4.15376	NA	4.49076	NA	High	High	High_High
BRD:BRD-K06858286-001-01-3	ACH-000571	-3.54861	CABAZITAXEL	2.5	T98G_CENTRAL_NERVOUS_SYSTEM	Male	CENTRAL_NERVOUS_SYSTEM	Central Nervous System	Glioblastoma	NA	2	Mutant	3.53297	6.6173	5.45677	4.35245	3.3825	3.45725	2.12732	High	Low	High_Low
BRD:BRD-K06858286-001-01-3	ACH-000572	-0.567403	CABAZITAXEL	2.5	G361_SKIN	Male	SKIN	Skin	Melanoma	NA	0	WT	3.74421	3.59069	5.21167	3.64299	NA	4.66117	NA	High	High	High_High
BRD:BRD-K06858286-001-01-3	ACH-000573	-2.51669	CABAZITAXEL	2.5	MDAMB436_BREAST	Female	BREAST	Breast	Breast Carcinoma	Invasive Ductal Carcinoma of No Special Type	0	WT	3.8097	5.06264	6.04702	3.59469	NA	4.22769	NA	High	High	High_High
BRD:BRD-K06858286-001-01-3	ACH-000579	0.0563604	CABAZITAXEL	2.5	UACC257_SKIN	Unknown	SKIN	Skin	Melanoma	NA	0	WT	3.12285	4.46738	4.31387	4.50535	NA	3.86841	NA	Low	High	Low_High
BRD:BRD-K06858286-001-01-3	ACH-000580	-1.91156	CABAZITAXEL	2.5	C32_SKIN	Male	SKIN	Skin	Melanoma	Cutaneous melanoma	0	WT	3.00002	4.92997	4.82132	3.45545	NA	4.68426	NA	Low	High	Low_High
BRD:BRD-K06858286-001-01-3	ACH-000582	-3.25177	CABAZITAXEL	2.5	COLO741_SKIN	Unknown	SKIN	NA	NA	NA	0	WT	3.34688	3.69722	4.78808	4.49426	NA	NA	NA	Low	NA	Low_NA
BRD:BRD-K06858286-001-01-3	ACH-000587	-1.8586	CABAZITAXEL	2.5	NCIH1975_LUNG	Female	LUNG	Lung	Non-Small Cell Lung Carcinoma	Lung Adenocarcinoma	2	Mutant	3.09589	6.53072	4.53184	4.42737	3.83666	3.88759	NA	Low	Low	Low_Low
BRD:BRD-K06858286-001-01-3	ACH-000589	-3.24849	CABAZITAXEL	2.5	NCIH1437_LUNG	Male	LUNG	Lung	Non-Small Cell Lung Carcinoma	Lung Adenocarcinoma	2	Mutant	3.41414	3.82845	3.9303	4.38158	NA	3.69239	1.06067	Low	Low	Low_Low
BRD:BRD-K06858286-001-01-3	ACH-000590	-0.338847	CABAZITAXEL	2.5	NA	Unknown	NA	NA	NA	NA	1	Mutant	3.25931	4.65932	3.54514	1.79259	NA	NA	NA	Low	NA	Low_NA
BRD:BRD-K06858286-001-01-3	ACH-000592	-3.23081	CABAZITAXEL	2.5	TM31_CENTRAL_NERVOUS_SYSTEM	Unknown	CENTRAL_NERVOUS_SYSTEM	NA	NA	NA	2	Mutant	3.84764	5.04001	4.43134	5.07885	NA	NA	NA	High	NA	High_NA
BRD:BRD-K06858286-001-01-3	ACH-000593	-3.3259	CABAZITAXEL	2.5	BC3C_URINARY_TRACT	Unknown	URINARY_TRACT	NA	NA	NA	2	Mutant	3.36298	6.25791	4.54429	4.31616	NA	NA	NA	Low	NA	Low_NA
BRD:BRD-K06858286-001-01-3	ACH-000595	-3.20745	CABAZITAXEL	2.5	LN229_CENTRAL_NERVOUS_SYSTEM	Female	CENTRAL_NERVOUS_SYSTEM	Central Nervous System	Glioblastoma	NA	0	WT	3.67675	5.30834	4.54373	2.59074	NA	3.70584	NA	High	Low	High_Low
BRD:BRD-K06858286-001-01-3	ACH-000597	-2.10543	CABAZITAXEL	2.5	TTC709_SOFT_TISSUE	Unknown	SOFT_TISSUE	NA	NA	NA	0	WT	5.44778	5.99639	4.38949	4.53162	NA	NA	NA	High	NA	High_NA
BRD:BRD-K06858286-001-01-3	ACH-000599	-1.18832	CABAZITAXEL	2.5	PATU8902_PANCREAS	Female	PANCREAS	Pancreas	Pancreatic Carcinoma	Pancreatic adenocarcinoma	2	Mutant	2.88644	6.76655	4.20921	5.05393	4.83305	3.5949	NA	Low	Low	Low_Low
BRD:BRD-K06858286-001-01-3	ACH-000601	-2.67913	CABAZITAXEL	2.5	MIAPACA2_PANCREAS	Male	PANCREAS	Pancreas	Pancreatic Carcinoma	Pancreatic ductal adenocarcinoma	2	Mutant	2.75128	6.02192	3.91157	3.39288	4.66259	3.21672	NA	Low	Low	Low_Low
BRD:BRD-K06858286-001-01-3	ACH-000603	-1.3397	CABAZITAXEL	2.5	BEN_LUNG	Male	LUNG	Lung	Non-Small Cell Lung Carcinoma	NA	2	Mutant	3.67027	3.8994	4.70266	3.38354	NA	4.784	NA	High	High	High_High
BRD:BRD-K06858286-001-01-3	ACH-000605	-3.24822	CABAZITAXEL	2.5	TE6_OESOPHAGUS	Male	OESOPHAGUS	Esophagus	Esophageal Carcinoma	Esophageal Squamous Cell Carcinoma	2	Mutant	3.80179	6.25225	5.1517	4.99482	3.18362	4.37109	NA	High	High	High_High
BRD:BRD-K06858286-001-01-3	ACH-000608	-2.31419	CABAZITAXEL	2.5	COV644_OVARY	Female	OVARY	NA	NA	NA	0	WT	4.31936	1.4662	3.42247	4.11664	NA	NA	NA	High	NA	High_NA
BRD:BRD-K06858286-001-01-3	ACH-000609	-0.944657	CABAZITAXEL	2.5	SF126_CENTRAL_NERVOUS_SYSTEM	Female	CENTRAL_NERVOUS_SYSTEM	Central Nervous System	Glioblastoma	NA	0	WT	3.2693	2.43789	5.34766	4.62481	NA	4.17849	NA	Low	High	Low_High
BRD:BRD-K06858286-001-01-3	ACH-000613	-3.45543	CABAZITAXEL	2.5	HOS_BONE	Female	BONE	Bone	Osteosarcoma	NA	2	Mutant	3.57518	6.64574	4.85798	4.29769	2.87303	3.47386	NA	Low	Low	Low_Low
BRD:BRD-K06858286-001-01-3	ACH-000614	-1.53993	CABAZITAXEL	2.5	RVH421_SKIN	Male	SKIN	Skin	Melanoma	NA	0	WT	2.98629	5.79902	3.99651	2.93522	NA	3.64887	NA	Low	Low	Low_Low
BRD:BRD-K06858286-001-01-3	ACH-000616	-2.63485	CABAZITAXEL	2.5	NA	Male	NA	Stomach	Gastric Carcinoma	Gastric adenocarcinoma	0	WT	3.39728	3.13783	5.28707	5.25419	NA	4.39921	NA	High	High	High_High
BRD:BRD-K06858286-001-01-3	ACH-000617	-1.23054	CABAZITAXEL	2.5	NA	Female	NA	Ovary	Ovarian Carcinoma	High grade ovarian serous adenocarcinoma	2	Mutant	3.03546	4.855	3.62793	4.54578	2.88077	2.97114	NA	Low	Low	Low_Low
BRD:BRD-K06858286-001-01-3	ACH-000618	-1.29602	CABAZITAXEL	2.5	SNU1041_UPPER_AERODIGESTIVE_TRACT	Unknown	UPPER_AERODIGESTIVE_TRACT	NA	NA	NA	2	Mutant	3.95145	5.46494	3.93874	3.3346	NA	NA	NA	High	NA	High_NA
BRD:BRD-K06858286-001-01-3	ACH-000619	-2.87169	CABAZITAXEL	2.5	PECAPJ15_UPPER_AERODIGESTIVE_TRACT	Male	UPPER_AERODIGESTIVE_TRACT	Head and Neck	Head and Neck Carcinoma	Tongue Squamous Cell Carcinoma	2	Mutant	2.53139	5.60525	4.34249	3.55445	4.12376	4.44442	NA	Low	High	Low_High
BRD:BRD-K06858286-001-01-3	ACH-000620	-2.4805	CABAZITAXEL	2.5	JHH1_LIVER	Male	LIVER	Liver	Hepatocellular Carcinoma	NA	0	WT	5.04782	4.85153	4.41791	3.93343	NA	4.27184	NA	High	High	High_High
BRD:BRD-K06858286-001-01-3	ACH-000622	0.142315	CABAZITAXEL	2.5	KNS42_CENTRAL_NERVOUS_SYSTEM	Male	CENTRAL_NERVOUS_SYSTEM	Central Nervous System	Glioblastoma	NA	2	Mutant	4.0358	4.98372	5.98688	5.24089	NA	5.19955	NA	High	High	High_High
BRD:BRD-K06858286-001-01-3	ACH-000623	-1.4365	CABAZITAXEL	2.5	SNU201_CENTRAL_NERVOUS_SYSTEM	Unknown	CENTRAL_NERVOUS_SYSTEM	NA	NA	NA	1	Mutant	3.03713	6.92487	5.49398	3.94373	NA	NA	NA	Low	NA	Low_NA
BRD:BRD-K06858286-001-01-3	ACH-000624	-2.59261	CABAZITAXEL	2.5	HCC1806_BREAST	Female	BREAST	Breast	Breast Carcinoma	Breast squamous cell carcinoma	0	WT	2.73296	3.84116	4.45903	4.30437	NA	4.72365	NA	Low	High	Low_High
BRD:BRD-K06858286-001-01-3	ACH-000625	-0.978427	CABAZITAXEL	2.5	HEP3B217_LIVER	Male	LIVER	Liver	Hepatocellular Carcinoma	NA	0	WT	3.75243	4.48271	4.26312	2.58404	NA	3.23904	NA	High	Low	High_Low
BRD:BRD-K06858286-001-01-3	ACH-000627	-4.65565	CABAZITAXEL	2.5	LCLC103H_LUNG	Male	LUNG	Lung	Non-Small Cell Lung Carcinoma	Lung large cell carcinoma	2	Mutant	2.5662	5.5331	4.91379	4.13077	NA	3.91428	NA	Low	Low	Low_Low
BRD:BRD-K06858286-001-01-3	ACH-000628	-2.12281	CABAZITAXEL	2.5	NCIH596_LUNG	Male	LUNG	Lung	Non-Small Cell Lung Carcinoma	Adenosquamous lung carcinoma	2	Mutant	3.30166	6.37636	5.13231	4.44233	1.84835	4.52063	NA	Low	High	Low_High
BRD:BRD-K06858286-001-01-3	ACH-000630	-0.368467	CABAZITAXEL	2.5	YD8_UPPER_AERODIGESTIVE_TRACT	Unknown	UPPER_AERODIGESTIVE_TRACT	NA	NA	NA	2	Mutant	3.56241	6.86202	5.16673	3.89924	NA	NA	NA	High	NA	High_NA
BRD:BRD-K06858286-001-01-3	ACH-000631	-1.40271	CABAZITAXEL	2.5	KS1_CENTRAL_NERVOUS_SYSTEM	Female	CENTRAL_NERVOUS_SYSTEM	Central Nervous System	Glioblastoma	NA	0	WT	3.59012	5.59771	4.87621	4.044	NA	4.36572	NA	High	High	High_High
BRD:BRD-K06858286-001-01-3	ACH-000632	-3.1648	CABAZITAXEL	2.5	HS944T_SKIN	Unknown	SKIN	NA	NA	NA	0	WT	3.17077	3.92448	3.81886	2.32652	NA	NA	NA	Low	NA	Low_NA
BRD:BRD-K06858286-001-01-3	ACH-000637	-1.40975	CABAZITAXEL	2.5	KYSE520_OESOPHAGUS	Female	OESOPHAGUS	Esophagus	Esophageal Carcinoma	Esophageal Squamous Cell Carcinoma	0	WT	3.25501	5.67754	4.98078	4.55021	NA	4.0781	NA	Low	Low	Low_Low
BRD:BRD-K06858286-001-01-3	ACH-000638	-1.48645	CABAZITAXEL	2.5	NCIH441_LUNG	Male	LUNG	Lung	Non-Small Cell Lung Carcinoma	Lung Adenocarcinoma	2	Mutant	4.01195	5.74212	4.27799	4.78157	NA	4.21684	NA	High	High	High_High
BRD:BRD-K06858286-001-01-3	ACH-000643	-0.880968	CABAZITAXEL	2.5	HDQP1_BREAST	Female	BREAST	Breast	Breast Carcinoma	NA	2	Mutant	2.84718	3.64157	3.8646	3.10907	NA	4.18591	NA	Low	High	Low_High
BRD:BRD-K06858286-001-01-3	ACH-000644	-0.810287	CABAZITAXEL	2.5	NA	Male	NA	Skin	Melanoma	Cutaneous melanoma	0	WT	3.34147	4.87471	4.18438	3.1578	NA	3.5482	NA	Low	Low	Low_Low
BRD:BRD-K06858286-001-01-3	ACH-000645	-1.44412	CABAZITAXEL	2.5	JL1_PLEURA	Unknown	PLEURA	NA	NA	NA	0	WT	2.18039	6.54529	4.80099	2.03369	NA	NA	NA	Low	NA	Low_NA
BRD:BRD-K06858286-001-01-3	ACH-000647	-2.06014	CABAZITAXEL	2.5	TE1_OESOPHAGUS	Male	OESOPHAGUS	Esophagus	Esophageal Carcinoma	Esophageal Squamous Cell Carcinoma	2	Mutant	3.40249	6.12038	4.26922	4.2394	2.88094	4.08058	NA	High	High	High_High
BRD:BRD-K06858286-001-01-3	ACH-000648	-1.22096	CABAZITAXEL	2.5	NCIH28_PLEURA	Male	PLEURA	Lung	Mesothelioma	Pleural Sarcomatoid Mesothelioma	0	WT	6.14531	5.99359	5.00718	2.8527	NA	4.99773	NA	High	High	High_High
BRD:BRD-K06858286-001-01-3	ACH-000649	-2.10756	CABAZITAXEL	2.5	786O_KIDNEY	Male	KIDNEY	Kidney	Kidney Carcinoma	NA	1	Mutant	3.26503	3.72692	3.10367	3.6997	NA	3.6032	NA	Low	Low	Low_Low
BRD:BRD-K06858286-001-01-3	ACH-000650	-2.91561	CABAZITAXEL	2.5	IGR37_SKIN	Male	SKIN	Skin	Melanoma	NA	0	WT	3.73905	1.43274	4.04276	4.29695	NA	4.53819	NA	High	High	High_High
BRD:BRD-K06858286-001-01-3	ACH-000651	-0.603745	CABAZITAXEL	2.5	SW620_LARGE_INTESTINE	Male	LARGE_INTESTINE	Large Intestine	Colorectal Carcinoma	Colon adenocarcinoma	2	Mutant	3.89303	5.89685	4.25563	4.71939	4.91585	3.74619	NA	High	Low	High_Low
BRD:BRD-K06858286-001-01-3	ACH-000652	-2.91226	CABAZITAXEL	2.5	SUIT2_PANCREAS	Male	PANCREAS	Pancreas	Pancreatic Carcinoma	Pancreatic ductal adenocarcinoma	2	Mutant	4.62314	4.81531	4.17217	5.25218	3.47098	3.77354	-0.77067	High	High	High_High
BRD:BRD-K06858286-001-01-3	ACH-000657	-2.1546	CABAZITAXEL	2.5	A2780_OVARY	Female	OVARY	Ovary	Ovarian Carcinoma	Ovarian endometrioid adenocarcinoma	0	WT	3.13225	5.59103	5.484	4.63919	NA	4.62938	NA	Low	High	Low_High
BRD:BRD-K06858286-001-01-3	ACH-000661	-2.27392	CABAZITAXEL	2.5	WM1799_SKIN	Unknown	SKIN	NA	NA	NA	0	WT	3.29329	5.37751	4.78135	3.86034	NA	NA	NA	Low	NA	Low_NA
BRD:BRD-K06858286-001-01-3	ACH-000662	-3.1911	CABAZITAXEL	2.5	CORL23_LUNG	Male	LUNG	Lung	Non-Small Cell Lung Carcinoma	Lung large cell carcinoma	0	WT	3.13069	7.5604	4.52557	4.36815	1.62416	3.72727	NA	Low	Low	Low_Low
BRD:BRD-K06858286-001-01-3	ACH-000663	-2.8777	CABAZITAXEL	2.5	OVTOKO_OVARY	Female	OVARY	Ovary	Ovarian Carcinoma	Ovarian clear cell adenocarcinoma	0	WT	3.44728	4.78963	2.21066	2.84515	NA	3.07603	NA	High	Low	High_Low
BRD:BRD-K06858286-001-01-3	ACH-000665	-1.25644	CABAZITAXEL	2.5	SKMES1_LUNG	Male	LUNG	Lung	Non-Small Cell Lung Carcinoma	Squamous Cell Lung Carcinoma	2	Mutant	3.36565	2.5908	5.61993	4.29918	NA	4.2853	NA	Low	High	Low_High
BRD:BRD-K06858286-001-01-3	ACH-000666	-1.6364	CABAZITAXEL	2.5	NCIH1355_LUNG	Male	LUNG	Lung	Non-Small Cell Lung Carcinoma	Lung Adenocarcinoma	2	Mutant	3.90231	5.05788	4.9248	5.30436	NA	4.29982	2.80384	High	High	High_High
BRD:BRD-K06858286-001-01-3	ACH-000667	-2.01884	CABAZITAXEL	2.5	HCC44_LUNG	Unknown	LUNG	NA	NA	NA	2	Mutant	2.34383	1.95769	2.6568	2.17975	NA	NA	NA	Low	NA	Low_NA
BRD:BRD-K06858286-001-01-3	ACH-000669	-4.37853	CABAZITAXEL	2.5	SW900_LUNG	Unknown	LUNG	NA	NA	NA	2	Mutant	3.61057	3.78765	4.62982	4.24402	NA	NA	NA	High	NA	High_NA
BRD:BRD-K06858286-001-01-3	ACH-000670	-4.00825	CABAZITAXEL	2.5	SBC5_LUNG	Male	LUNG	Lung	Small Cell Lung Carcinoma	NA	2	Mutant	3.90324	5.20707	5.04857	4.33514	NA	5.70679	NA	High	High	High_High
BRD:BRD-K06858286-001-01-3	ACH-000671	-1.54065	CABAZITAXEL	2.5	HUH6_LIVER	Unknown	LIVER	NA	NA	NA	2	Mutant	3.59355	4.78496	2.48236	4.67865	NA	NA	NA	Low	NA	Low_NA
BRD:BRD-K06858286-001-01-3	ACH-000672	-0.837386	CABAZITAXEL	2.5	IALM_LUNG	Male	LUNG	Lung	Non-Small Cell Lung Carcinoma	Lung large cell carcinoma	2	Mutant	3.00002	2.86223	4.777	4.7318	NA	3.6833	NA	Low	Low	Low_Low
BRD:BRD-K06858286-001-01-3	ACH-000674	-3.08799	CABAZITAXEL	2.5	NUGC4_STOMACH	Female	STOMACH	Stomach	Gastric Carcinoma	Gastric signet ring cell adenocarcinoma	0	WT	4.71546	5.81376	3.42955	1.98509	NA	2.79869	NA	High	Low	High_Low
BRD:BRD-K06858286-001-01-3	ACH-000677	-0.913293	CABAZITAXEL	2.5	SW1573_LUNG	Female	LUNG	Lung	Non-Small Cell Lung Carcinoma	Lung Adenocarcinoma	0	WT	4.16904	5.59316	4.3263	5.32291	NA	3.73337	NA	High	Low	High_Low
BRD:BRD-K06858286-001-01-3	ACH-000678	-0.875066	CABAZITAXEL	2.5	MKN7_STOMACH	Male	STOMACH	Stomach	Gastric Carcinoma	Gastric tubular adenocarcinoma	2	Mutant	3.31689	6.19031	3.25898	4.74468	2.6668	2.66925	NA	Low	Low	Low_Low
BRD:BRD-K06858286-001-01-3	ACH-000679	-0.435174	CABAZITAXEL	2.5	OE19_OESOPHAGUS	Male	OESOPHAGUS	Esophagus	Esophageal Carcinoma	Esophageal Adenocarcinoma	0	WT	3.73595	3.49084	3.64743	3.56758	NA	3.9106	NA	High	Low	High_Low
BRD:BRD-K06858286-001-01-3	ACH-000680	0.215689	CABAZITAXEL	2.5	SW948_LARGE_INTESTINE	Female	LARGE_INTESTINE	Large Intestine	Colorectal Carcinoma	Colon adenocarcinoma	0	WT	4.10594	3.21212	3.28381	4.48309	NA	3.40469	NA	High	Low	High_Low
BRD:BRD-K06858286-001-01-3	ACH-000681	-0.9412	CABAZITAXEL	2.5	A549_LUNG	Male	LUNG	Lung	Non-Small Cell Lung Carcinoma	Lung Adenocarcinoma	0	WT	3.58094	5.07725	3.76321	3.75967	NA	3.17031	NA	High	Low	High_Low
BRD:BRD-K06858286-001-01-3	ACH-000682	-2.18416	CABAZITAXEL	2.5	SNU1066_UPPER_AERODIGESTIVE_TRACT	Unknown	UPPER_AERODIGESTIVE_TRACT	NA	NA	NA	0	WT	3.2333	2.98067	3.54404	4.98434	NA	NA	NA	High	NA	High_NA
BRD:BRD-K06858286-001-01-3	ACH-000684	-0.617944	CABAZITAXEL	2.5	KMRC1_KIDNEY	Male	KIDNEY	Kidney	Kidney Carcinoma	Clear cell renal cell carcinoma	0	WT	2.10079	3.26589	2.85163	2.47748	NA	3.03455	NA	Low	Low	Low_Low
BRD:BRD-K06858286-001-01-3	ACH-000685	-3.41806	CABAZITAXEL	2.5	L33_PANCREAS	Unknown	PANCREAS	NA	NA	NA	0	WT	3.14158	2.81674	4.49442	4.0769	NA	NA	NA	Low	NA	Low_NA
BRD:BRD-K06858286-001-01-3	ACH-000688	-1.08775	CABAZITAXEL	2.5	OV7_OVARY	Female	OVARY	Ovary	Ovarian Carcinoma	NA	2	Mutant	2.66379	4.68508	3.83786	3.73852	NA	4.78521	NA	Low	High	Low_High
BRD:BRD-K06858286-001-01-3	ACH-000692	-2.6272	CABAZITAXEL	2.5	SNU899_UPPER_AERODIGESTIVE_TRACT	Unknown	UPPER_AERODIGESTIVE_TRACT	NA	NA	NA	2	Mutant	3.63629	5.57484	3.30569	4.92197	NA	NA	NA	High	NA	High_NA
BRD:BRD-K06858286-001-01-3	ACH-000693	-4.71603	CABAZITAXEL	2.5	KYSE180_OESOPHAGUS	Male	OESOPHAGUS	Esophagus	Esophageal Carcinoma	Esophageal Squamous Cell Carcinoma	2	Mutant	3.37627	5.68355	4.37058	3.94932	3.2854	4.13679	NA	Low	High	Low_High
BRD:BRD-K06858286-001-01-3	ACH-000694	-3.3804	CABAZITAXEL	2.5	TE9_OESOPHAGUS	Male	OESOPHAGUS	Esophagus	Esophageal Carcinoma	Esophageal Squamous Cell Carcinoma	0	WT	3.44097	4.11049	4.64097	3.3249	NA	3.61823	NA	High	Low	High_Low
BRD:BRD-K06858286-001-01-3	ACH-000696	-4.30814	CABAZITAXEL	2.5	OVCAR8_OVARY	Female	OVARY	Ovary	Ovarian Carcinoma	High grade ovarian serous adenocarcinoma	0	WT	3.19491	5.72164	4.25085	3.94652	NA	3.25124	NA	Low	Low	Low_Low
BRD:BRD-K06858286-001-01-3	ACH-000698	-0.398552	CABAZITAXEL	2.5	DMS53_LUNG	Male	LUNG	Lung	Small Cell Lung Carcinoma	NA	2	Mutant	4.79074	5.73302	4.5095	5.00663	NA	4.37654	NA	High	High	High_High
BRD:BRD-K06858286-001-01-3	ACH-000699	0.770355	CABAZITAXEL	2.5	HCC1395_BREAST	Female	BREAST	Breast	Breast Carcinoma	Ductal Breast Carcinoma	2	Mutant	2.37026	7.05369	4.75802	3.59819	3.82305	4.86137	NA	Low	High	Low_High
BRD:BRD-K06858286-001-01-3	ACH-000701	-1.04928	CABAZITAXEL	2.5	RMUGS_OVARY	Female	OVARY	NA	NA	NA	0	WT	2.95845	6.09669	3.43308	4.33586	NA	NA	NA	Low	NA	Low_NA
BRD:BRD-K06858286-001-01-3	ACH-000704	-0.533724	CABAZITAXEL	2.5	OAW42_OVARY	Female	OVARY	Ovary	Ovarian Carcinoma	Ovarian Cystadenocarcinoma	0	WT	4.24135	5.39838	4.1096	3.81133	NA	4.66509	NA	High	High	High_High
BRD:BRD-K06858286-001-01-3	ACH-000706	-2.08475	CABAZITAXEL	2.5	EKVX_LUNG	Male	LUNG	Lung	Non-Small Cell Lung Carcinoma	Lung adenocarcinoma	0	WT	4.1543	2.66499	5.17939	3.78054	NA	5.4737	NA	High	High	High_High
BRD:BRD-K06858286-001-01-3	ACH-000711	-2.6726	CABAZITAXEL	2.5	JIMT1_BREAST	Female	BREAST	Breast	Breast Carcinoma	Ductal Breast Carcinoma	2	Mutant	2.86974	6.60435	3.83336	4.40811	4.38967	3.85532	NA	Low	Low	Low_Low
BRD:BRD-K06858286-001-01-3	ACH-000713	-3.01779	CABAZITAXEL	2.5	CAOV3_OVARY	Female	OVARY	Ovary	Ovarian Carcinoma	High grade ovarian serous adenocarcinoma	2	Mutant	4.31308	1.72996	4.56891	4.2775	NA	4.21818	NA	High	High	High_High
BRD:BRD-K06858286-001-01-3	ACH-000715	-2.36256	CABAZITAXEL	2.5	SNU1214_UPPER_AERODIGESTIVE_TRACT	Unknown	UPPER_AERODIGESTIVE_TRACT	NA	NA	NA	2	Mutant	3.61957	4.97596	3.97202	4.16513	NA	NA	NA	High	NA	High_NA
BRD:BRD-K06858286-001-01-3	ACH-000716	-2.74926	CABAZITAXEL	2.5	TT2609C02_THYROID	Male	THYROID	Thyroid	Thyroid Gland Carcinoma	Thyroid gland follicular carcinoma	2	Mutant	3.28346	5.28505	4.50718	4.89084	4.19185	3.69507	NA	High	Low	High_Low
BRD:BRD-K06858286-001-01-3	ACH-000717	-1.26477	CABAZITAXEL	2.5	COLO680N_OESOPHAGUS	Female	OESOPHAGUS	Esophagus	Esophageal Carcinoma	Esophageal Squamous Cell Carcinoma	2	Mutant	3.31551	7.14298	4.60726	5.17005	4.88695	3.41314	NA	Low	Low	Low_Low
BRD:BRD-K06858286-001-01-3	ACH-000719	-1.75255	CABAZITAXEL	2.5	RMGI_OVARY	Female	OVARY	Ovary	Ovarian Carcinoma	Ovarian clear cell adenocarcinoma	0	WT	2.69354	3.27443	3.25502	2.38104	NA	2.87858	NA	Low	Low	Low_Low
BRD:BRD-K06858286-001-01-3	ACH-000720	-3.40646	CABAZITAXEL	2.5	TCCSUP_URINARY_TRACT	Female	URINARY_TRACT	Bladder	Bladder Carcinoma	NA	2	Mutant	3.2157	5.09003	4.84278	3.91927	NA	5.13197	NA	Low	High	Low_High
BRD:BRD-K06858286-001-01-3	ACH-000721	-4.43658	CABAZITAXEL	2.5	HMC18_BREAST	Female	BREAST	NA	NA	NA	0	WT	3.02206	2.77774	3.58072	4.15295	NA	NA	NA	Low	NA	Low_NA
BRD:BRD-K06858286-001-01-3	ACH-000723	-4.3576	CABAZITAXEL	2.5	YD10B_UPPER_AERODIGESTIVE_TRACT	Unknown	UPPER_AERODIGESTIVE_TRACT	NA	NA	NA	0	WT	3.20979	3.06946	4.21412	3.71923	NA	NA	NA	High	NA	High_NA
BRD:BRD-K06858286-001-01-3	ACH-000724	-2.19264	CABAZITAXEL	2.5	HT1376_URINARY_TRACT	Female	URINARY_TRACT	Bladder	Bladder Carcinoma	NA	2	Mutant	3.94966	6.58361	4.39505	4.67806	1.29136	4.26346	NA	High	High	High_High
BRD:BRD-K06858286-001-01-3	ACH-000726	-3.60973	CABAZITAXEL	2.5	TE14_OESOPHAGUS	Unknown	OESOPHAGUS	NA	NA	NA	2	Mutant	3.70241	3.57334	3.98758	4.72899	NA	NA	NA	High	NA	High_NA
BRD:BRD-K06858286-001-01-3	ACH-000730	-2.9844	CABAZITAXEL	2.5	SKMEL5_SKIN	Female	SKIN	Skin	Melanoma	Cutaneous melanoma	0	WT	3.36698	3.92999	4.25972	3.71166	NA	3.31873	NA	Low	Low	Low_Low
BRD:BRD-K06858286-001-01-3	ACH-000732	-3.19296	CABAZITAXEL	2.5	PECAPJ41CLONED2_UPPER_AERODIGESTIVE_TRACT	Unknown	UPPER_AERODIGESTIVE_TRACT	NA	NA	NA	0	WT	1.84365	2.67559	2.73888	2.58628	NA	NA	NA	Low	NA	Low_NA
BRD:BRD-K06858286-001-01-3	ACH-000733	0.0680213	CABAZITAXEL	2.5	NCIH1838_LUNG	Female	LUNG	Lung	Non-Small Cell Lung Carcinoma	Lung Adenocarcinoma	2	Mutant	3.91338	6.05241	4.35149	4.08544	4.37394	3.57244	NA	High	Low	High_Low
BRD:BRD-K06858286-001-01-3	ACH-000734	-2.39731	CABAZITAXEL	2.5	JHH5_LIVER	Unknown	LIVER	NA	NA	NA	0	WT	3.67351	5.68897	3.56357	3.60864	NA	NA	NA	High	NA	High_NA
BRD:BRD-K06858286-001-01-3	ACH-000735	-4.54981	CABAZITAXEL	2.5	PECAPJ49_UPPER_AERODIGESTIVE_TRACT	Unknown	UPPER_AERODIGESTIVE_TRACT	NA	NA	NA	0	WT	2.43183	0.395719	4.03962	3.49457	NA	NA	NA	Low	NA	Low_NA
BRD:BRD-K06858286-001-01-3	ACH-000736	-3.09828	CABAZITAXEL	2.5	SNU601_STOMACH	Unknown	STOMACH	NA	NA	NA	2	Mutant	3.33196	6.51585	3.95713	4.36886	NA	NA	NA	Low	NA	Low_NA
BRD:BRD-K06858286-001-01-3	ACH-000738	-1.92387	CABAZITAXEL	2.5	GB1_CENTRAL_NERVOUS_SYSTEM	Male	CENTRAL_NERVOUS_SYSTEM	Central Nervous System	Glioblastoma	NA	0	WT	3.54482	7.34234	4.60618	4.36744	4.1787	3.61688	NA	High	Low	High_Low
BRD:BRD-K06858286-001-01-3	ACH-000739	-1.61683	CABAZITAXEL	2.5	HEPG2_LIVER	Unknown	LIVER	NA	NA	NA	0	WT	3.7748	4.8752	2.50204	3.57706	NA	NA	NA	High	NA	High_NA
BRD:BRD-K06858286-001-01-3	ACH-000740	-1.18849	CABAZITAXEL	2.5	A253_SALIVARY_GLAND	Male	SALIVARY_GLAND	Head and Neck	Head and Neck Carcinoma	Salivary gland squamous cell carcinoma	0	WT	3.42185	3.02488	3.70741	4.0614	NA	3.22208	NA	High	Low	High_Low
BRD:BRD-K06858286-001-01-3	ACH-000741	-3.72906	CABAZITAXEL	2.5	UBLC1_URINARY_TRACT	Unknown	URINARY_TRACT	NA	NA	NA	2	Mutant	4.34287	3.72902	2.43541	4.18763	NA	NA	NA	High	NA	High_NA
BRD:BRD-K06858286-001-01-3	ACH-000744	-1.43967	CABAZITAXEL	2.5	NCIH1623_LUNG	Male	LUNG	Lung	Non-Small Cell Lung Carcinoma	Lung Adenocarcinoma	2	Mutant	3.69391	4.74868	4.36106	4.80908	NA	3.76787	NA	High	Low	High_Low
BRD:BRD-K06858286-001-01-3	ACH-000747	-4.7208	CABAZITAXEL	2.5	NCIH1703_LUNG	Male	LUNG	Lung	Non-Small Cell Lung Carcinoma	Squamous Cell Lung Carcinoma	0	WT	2.77535	4.25988	5.38015	3.92022	NA	4.55518	NA	Low	High	Low_High
BRD:BRD-K06858286-001-01-3	ACH-000748	-0.813523	CABAZITAXEL	2.5	SJSA1_BONE	Male	BONE	Bone	Osteosarcoma	NA	0	WT	4.28765	5.89188	4.59804	2.84136	NA	3.68404	NA	High	Low	High_Low
BRD:BRD-K06858286-001-01-3	ACH-000749	-2.92487	CABAZITAXEL	2.5	DMS273_LUNG	Female	LUNG	Lung	Small Cell Lung Carcinoma	NA	2	Mutant	4.05595	5.30135	3.35473	3.7095	2.13165	3.09509	NA	High	Low	High_Low
BRD:BRD-K06858286-001-01-3	ACH-000750	-4.02146	CABAZITAXEL	2.5	LOXIMVI_SKIN	Male	SKIN	Skin	Melanoma	Cutaneous melanoma	0	WT	2.91205	4.73692	4.50661	4.02464	NA	3.93512	NA	Low	High	Low_High
BRD:BRD-K06858286-001-01-3	ACH-000753	-2.87243	CABAZITAXEL	2.5	JMSU1_URINARY_TRACT	Unknown	URINARY_TRACT	NA	NA	NA	1	Mutant	2.98457	6.20936	5.3589	3.78054	NA	NA	NA	Low	NA	Low_NA
BRD:BRD-K06858286-001-01-3	ACH-000756	-3.12873	CABAZITAXEL	2.5	GI1_CENTRAL_NERVOUS_SYSTEM	Male	CENTRAL_NERVOUS_SYSTEM	Central Nervous System	Glioblastoma	NA	2	Mutant	2.89564	5.82525	6.20397	3.73958	2.46095	4.9769	NA	Low	High	Low_High
BRD:BRD-K06858286-001-01-3	ACH-000758	-1.58944	CABAZITAXEL	2.5	MKN74_STOMACH	Unknown	STOMACH	NA	NA	NA	2	Mutant	4.58057	7.29223	6.03484	5.33057	NA	NA	NA	High	NA	High_NA
BRD:BRD-K06858286-001-01-3	ACH-000759	0.733466	CABAZITAXEL	2.5	MDAMB175VII_BREAST	Female	BREAST	Breast	Breast Carcinoma	Invasive Ductal Carcinoma of No Special Type	0	WT	3.09108	3.89565	4.35469	2.34751	NA	4.19664	NA	Low	High	Low_High
BRD:BRD-K06858286-001-01-3	ACH-000762	-3.88628	CABAZITAXEL	2.5	YD38_UPPER_AERODIGESTIVE_TRACT	Unknown	UPPER_AERODIGESTIVE_TRACT	NA	NA	NA	2	Mutant	3.03045	2.83966	2.97734	3.90403	NA	NA	NA	Low	NA	Low_NA
BRD:BRD-K06858286-001-01-3	ACH-000764	-2.87627	CABAZITAXEL	2.5	SH10TC_STOMACH	Unknown	STOMACH	NA	NA	NA	2	Mutant	3.03379	5.14704	4.66146	3.7095	NA	NA	NA	Low	NA	Low_NA
BRD:BRD-K06858286-001-01-3	ACH-000765	-0.352848	CABAZITAXEL	2.5	WM983B_SKIN	Unknown	SKIN	NA	NA	NA	2	Mutant	3.94338	6.12187	4.82508	3.04384	NA	NA	NA	High	NA	High_NA
BRD:BRD-K06858286-001-01-3	ACH-000766	-1.19424	CABAZITAXEL	2.5	NCIH1648_LUNG	Male	LUNG	Lung	Non-Small Cell Lung Carcinoma	Lung Adenocarcinoma	0	WT	2.82234	4.5625	4.93747	4.48638	NA	5.4241	1.92442	Low	High	Low_High
BRD:BRD-K06858286-001-01-3	ACH-000768	-0.760921	CABAZITAXEL	2.5	MDAMB231_BREAST	Female	BREAST	Breast	Breast Carcinoma	Breast adenocarcinoma	2	Mutant	3.60038	5.46329	3.17219	4.24709	5.16195	3.12457	NA	High	Low	High_Low
BRD:BRD-K06858286-001-01-3	ACH-000769	-3.52504	CABAZITAXEL	2.5	LK2_LUNG	Male	LUNG	Lung	Non-Small Cell Lung Carcinoma	Squamous Cell Lung Carcinoma	2	Mutant	4.76212	5.87562	4.09601	5.93551	2.22237	4.04963	NA	High	High	High_High
BRD:BRD-K06858286-001-01-3	ACH-000771	-1.85542	CABAZITAXEL	2.5	BICR56_UPPER_AERODIGESTIVE_TRACT	Unknown	UPPER_AERODIGESTIVE_TRACT	NA	NA	NA	0	WT	1.36541	4.64513	3.23774	2.28093	NA	NA	NA	Low	NA	Low_NA
BRD:BRD-K06858286-001-01-3	ACH-000774	0.192605	CABAZITAXEL	2.5	RERFLCAD2_LUNG	Unknown	LUNG	NA	NA	NA	2	Mutant	2.6158	5.25267	3.67871	3.37279	NA	NA	NA	Low	NA	Low_NA
BRD:BRD-K06858286-001-01-3	ACH-000775	0.431672	CABAZITAXEL	2.5	NCIH727_LUNG	Female	LUNG	Lung	Carcinoid Tumour	Lung Carcinoid Tumor	0	WT	4.17827	5.55909	3.95962	4.77229	2.38155	2.95176	NA	High	Low	High_Low
BRD:BRD-K06858286-001-01-3	ACH-000776	-1.84925	CABAZITAXEL	2.5	ONS76_CENTRAL_NERVOUS_SYSTEM	Female	CENTRAL_NERVOUS_SYSTEM	Central Nervous System	Other Solid Carcinomas	Medulloblastoma	0	WT	3.1979	5.03121	4.40992	2.10844	NA	2.94707	NA	Low	Low	Low_Low
BRD:BRD-K06858286-001-01-3	ACH-000777	-2.79985	CABAZITAXEL	2.5	KYSE30_OESOPHAGUS	Unknown	OESOPHAGUS	NA	NA	NA	1	Mutant	3.20831	4.27891	4.32564	4.24402	NA	NA	NA	Low	NA	Low_NA
BRD:BRD-K06858286-001-01-3	ACH-000778	-1.18706	CABAZITAXEL	2.5	HSC3_UPPER_AERODIGESTIVE_TRACT	Male	UPPER_AERODIGESTIVE_TRACT	Head and Neck	Head and Neck Carcinoma	Tongue Squamous Cell Carcinoma	0	WT	3.18289	2.14341	3.41655	3.73212	NA	3.39282	NA	High	Low	High_Low
BRD:BRD-K06858286-001-01-3	ACH-000781	-1.8103	CABAZITAXEL	2.5	NCIH2023_LUNG	Male	LUNG	Lung	Non-Small Cell Lung Carcinoma	Squamous Cell Lung Carcinoma	0	WT	3.06517	4.39642	4.76486	3.84947	NA	3.13285	NA	Low	Low	Low_Low
BRD:BRD-K06858286-001-01-3	ACH-000783	-1.446	CABAZITAXEL	2.5	CAMA1_BREAST	Female	BREAST	Breast	Breast Carcinoma	Breast adenocarcinoma	2	Mutant	3.78586	5.43254	5.33734	3.78778	NA	5.10317	NA	High	High	High_High
BRD:BRD-K06858286-001-01-3	ACH-000784	-0.873417	CABAZITAXEL	2.5	KYSE70_OESOPHAGUS	Male	OESOPHAGUS	Esophagus	Esophageal Carcinoma	Esophageal Squamous Cell Carcinoma	1	Mutant	3.31964	4.82798	4.25222	5.21475	3.41138	4.35543	1.43501	Low	High	Low_High
BRD:BRD-K06858286-001-01-3	ACH-000785	-3.71744	CABAZITAXEL	2.5	NCIH2126_LUNG	Unknown	LUNG	NA	NA	NA	2	Mutant	4.10836	3.28151	4.54768	4.98482	NA	NA	NA	High	NA	High_NA
BRD:BRD-K06858286-001-01-3	ACH-000787	-0.714968	CABAZITAXEL	2.5	LXF289_LUNG	Male	LUNG	Lung	Non-Small Cell Lung Carcinoma	Lung Adenocarcinoma	2	Mutant	3.59241	6.43694	4.14525	4.92644	3.98107	3.83162	NA	High	Low	High_Low
BRD:BRD-K06858286-001-01-3	ACH-000788	-4.24472	CABAZITAXEL	2.5	A2058_SKIN	Male	SKIN	Skin	Melanoma	Cutaneous melanoma	2	Mutant	3.52582	5.86553	4.25495	4.3844	NA	3.9744	NA	High	High	High_High
BRD:BRD-K06858286-001-01-3	ACH-000791	-2.27392	CABAZITAXEL	2.5	RERFLCAD1_LUNG	Unknown	LUNG	NA	NA	NA	2	Mutant	4.35721	6.06332	5.05663	4.79835	NA	NA	NA	High	NA	High_NA
BRD:BRD-K06858286-001-01-3	ACH-000792	-0.456978	CABAZITAXEL	2.5	BFTC909_KIDNEY	Male	KIDNEY	Kidney	Kidney Carcinoma	Renal pelvis and ureter urothelial carcinoma	2	Mutant	3.01869	4.69062	4.81662	3.26251	3.47011	4.27258	NA	Low	High	Low_High
BRD:BRD-K06858286-001-01-3	ACH-000794	-3.32215	CABAZITAXEL	2.5	BICR22_UPPER_AERODIGESTIVE_TRACT	Male	UPPER_AERODIGESTIVE_TRACT	Head and Neck	Head and Neck Carcinoma	Tongue Squamous Cell Carcinoma	0	WT	2.00996	2.42546	2.33935	1.93491	NA	3.79648	NA	Low	Low	Low_Low
BRD:BRD-K06858286-001-01-3	ACH-000796	-4.34086	CABAZITAXEL	2.5	MCAS_OVARY	Female	OVARY	NA	NA	NA	0	WT	3.27356	6.22479	4.08	4.54704	NA	NA	NA	High	NA	High_NA
BRD:BRD-K06858286-001-01-3	ACH-000800	-2.29466	CABAZITAXEL	2.5	NCIH446_LUNG	Male	LUNG	Lung	Small Cell Lung Carcinoma	NA	2	Mutant	4.31237	5.88565	4.29004	4.82451	2.23232	3.90463	0.79667	High	Low	High_Low
BRD:BRD-K06858286-001-01-3	ACH-000802	-2.04223	CABAZITAXEL	2.5	BFTC905_URINARY_TRACT	Female	URINARY_TRACT	Bladder	Bladder Carcinoma	Urothelial carcinoma	0	WT	3.78084	3.07595	3.61756	4.34237	NA	3.84949	NA	High	Low	High_Low
BRD:BRD-K06858286-001-01-3	ACH-000803	-0.683405	CABAZITAXEL	2.5	COLO668_LUNG	Female	LUNG	Lung	Small Cell Lung Carcinoma	NA	1	Mutant	5.11876	5.14785	4.54542	3.9002	1.72051	3.65473	NA	High	Low	High_Low
BRD:BRD-K06858286-001-01-3	ACH-000804	-3.52948	CABAZITAXEL	2.5	NB1_AUTONOMIC_GANGLIA	Male	AUTONOMIC_GANGLIA	Peripheral Nervous System	Neuroblastoma	NA	0	WT	3.89023	5.69579	4.84971	3.28406	NA	5.26113	NA	High	High	High_High
BRD:BRD-K06858286-001-01-3	ACH-000805	-2.94891	CABAZITAXEL	2.5	COLO679_SKIN	Female	SKIN	Skin	Melanoma	Cutaneous melanoma	0	WT	3.39989	4.00341	3.70839	3.87504	NA	2.45261	NA	High	Low	High_Low
BRD:BRD-K06858286-001-01-3	ACH-000808	-2.08149	CABAZITAXEL	2.5	HUH28_BILIARY_TRACT	Unknown	BILIARY_TRACT	NA	NA	NA	2	Mutant	3.1524	5.81035	4.07617	3.44777	NA	NA	NA	Low	NA	Low_NA
BRD:BRD-K06858286-001-01-3	ACH-000809	-4.67448	CABAZITAXEL	2.5	KYSE410_OESOPHAGUS	Male	OESOPHAGUS	Esophagus	Esophageal Carcinoma	Esophageal Squamous Cell Carcinoma	2	Mutant	3.16772	4.40514	4.50371	3.92117	NA	3.9325	NA	Low	Low	Low_Low
BRD:BRD-K06858286-001-01-3	ACH-000810	-1.37299	CABAZITAXEL	2.5	SKMEL30_SKIN	Male	SKIN	Skin	Melanoma	Cutaneous melanoma	1	Mutant	3.2333	3.98937	3.14686	2.86583	NA	2.90575	NA	Low	Low	Low_Low
BRD:BRD-K06858286-001-01-3	ACH-000811	-2.0129	CABAZITAXEL	2.5	SKOV3_OVARY	Female	OVARY	Ovary	Ovarian Carcinoma	Ovarian Cystadenocarcinoma	0	WT	4.12834	1.81852	5.79165	4.68387	NA	4.16043	NA	High	High	High_High
BRD:BRD-K06858286-001-01-3	ACH-000812	-2.31065	CABAZITAXEL	2.5	COLO783_SKIN	Female	SKIN	Skin	Melanoma	NA	0	WT	4.00074	5.61485	4.83721	4.64811	NA	5.14326	NA	High	High	High_High
BRD:BRD-K06858286-001-01-3	ACH-000813	-2.29548	CABAZITAXEL	2.5	T3M10_LUNG	Unknown	LUNG	NA	NA	NA	2	Mutant	3.44728	4.92429	4.11934	4.65816	NA	NA	NA	Low	NA	Low_NA
BRD:BRD-K06858286-001-01-3	ACH-000814	-1.55039	CABAZITAXEL	2.5	HS939T_SKIN	Female	SKIN	Skin	Melanoma	NA	0	WT	3.48462	4.51538	3.84414	3.85046	NA	3.07229	NA	High	Low	High_Low
BRD:BRD-K06858286-001-01-3	ACH-000819	-3.25323	CABAZITAXEL	2.5	LN18_CENTRAL_NERVOUS_SYSTEM	Male	CENTRAL_NERVOUS_SYSTEM	Central Nervous System	Glioblastoma	NA	2	Mutant	3.91704	5.6921	5.08412	4.78701	NA	4.08073	NA	High	Low	High_Low
BRD:BRD-K06858286-001-01-3	ACH-000822	-2.39423	CABAZITAXEL	2.5	SKMEL24_SKIN	Male	SKIN	Skin	Melanoma	NA	0	WT	3.10069	5.10186	4.24123	3.04883	NA	3.39519	NA	Low	Low	Low_Low
BRD:BRD-K06858286-001-01-3	ACH-000823	0.127146	CABAZITAXEL	2.5	KYSE140_OESOPHAGUS	Male	OESOPHAGUS	Esophagus	Esophageal Carcinoma	Esophageal Squamous Cell Carcinoma	2	Mutant	3.07494	6.27998	4.53978	3.66882	4.05443	4.43463	NA	Low	High	Low_High
BRD:BRD-K06858286-001-01-3	ACH-000824	-4.23278	CABAZITAXEL	2.5	KYSE510_OESOPHAGUS	Female	OESOPHAGUS	Esophagus	Esophageal Carcinoma	Esophageal Squamous Cell Carcinoma	1	Mutant	3.59811	3.9734	4.23433	4.18204	NA	3.91382	0.77211	High	Low	High_Low
BRD:BRD-K06858286-001-01-3	ACH-000826	-1.39567	CABAZITAXEL	2.5	CAL12T_LUNG	Male	LUNG	Lung	Non-Small Cell Lung Carcinoma	NA	2	Mutant	3.23038	6.47927	4.9182	4.63501	3.71181	4.68146	2.80573	Low	High	Low_High
BRD:BRD-K06858286-001-01-3	ACH-000827	-1.67093	CABAZITAXEL	2.5	WM793_SKIN	Male	SKIN	Skin	Melanoma	NA	0	WT	2.49092	4.94359	4.33927	3.89539	NA	3.57036	NA	Low	Low	Low_Low
BRD:BRD-K06858286-001-01-3	ACH-000832	-2.68142	CABAZITAXEL	2.5	CAL27_UPPER_AERODIGESTIVE_TRACT	Male	UPPER_AERODIGESTIVE_TRACT	Head and Neck	Head and Neck Carcinoma	Tongue Squamous Cell Carcinoma	2	Mutant	3.04874	6.13251	3.96872	3.32212	3.39928	4.16388	NA	Low	High	Low_High
BRD:BRD-K06858286-001-01-3	ACH-000833	-1.82883	CABAZITAXEL	2.5	RH30_SOFT_TISSUE	Unknown	SOFT_TISSUE	NA	NA	NA	2	Mutant	3.4435	5.40355	3.50982	4.5305	NA	NA	NA	Low	NA	Low_NA
BRD:BRD-K06858286-001-01-3	ACH-000834	-2.55197	CABAZITAXEL	2.5	UMUC1_URINARY_TRACT	Unknown	URINARY_TRACT	NA	NA	NA	2	Mutant	3.26074	5.88864	3.55275	3.28121	NA	NA	NA	Low	NA	Low_NA
BRD:BRD-K06858286-001-01-3	ACH-000835	-1.35051	CABAZITAXEL	2.5	GCT_SOFT_TISSUE	Male	SOFT_TISSUE	Soft Tissue	Other Sarcomas	Undifferentiated pleomorphic sarcoma	1	Mutant	3.20831	5.18852	5.04695	4.20271	NA	3.79399	NA	Low	Low	Low_Low
BRD:BRD-K06858286-001-01-3	ACH-000836	-2.06328	CABAZITAXEL	2.5	YD15_SALIVARY_GLAND	Unknown	SALIVARY_GLAND	NA	NA	NA	2	Mutant	3.27922	5.42441	4.19151	3.65764	NA	NA	NA	Low	NA	Low_NA
BRD:BRD-K06858286-001-01-3	ACH-000837	-2.07964	CABAZITAXEL	2.5	NCIH322_LUNG	Male	LUNG	Lung	Non-Small Cell Lung Carcinoma	Lung Adenocarcinoma	2	Mutant	2.70819	5.5822	4.49033	4.15458	2.24357	4.90727	1.96293	Low	High	Low_High
BRD:BRD-K06858286-001-01-3	ACH-000839	-4.34116	CABAZITAXEL	2.5	SCABER_URINARY_TRACT	Unknown	URINARY_TRACT	NA	NA	NA	2	Mutant	1.91673	4.43363	3.27079	2.86956	NA	NA	NA	Low	NA	Low_NA
BRD:BRD-K06858286-001-01-3	ACH-000840	-4.08657	CABAZITAXEL	2.5	NA	Female	NA	Lung	Non-Small Cell Lung Carcinoma	Adenosquamous lung carcinoma	2	Mutant	3.39467	5.93238	3.92011	5.50399	NA	3.3647	1.69244	High	Low	High_Low
BRD:BRD-K06858286-001-01-3	ACH-000841	-2.23969	CABAZITAXEL	2.5	NCIH2087_LUNG	Male	LUNG	Lung	Non-Small Cell Lung Carcinoma	Lung Adenocarcinoma	2	Mutant	3.77581	7.06502	4.93572	4.42052	3.54532	3.91139	NA	High	Low	High_Low
BRD:BRD-K06858286-001-01-3	ACH-000842	-0.745751	CABAZITAXEL	2.5	SW480_LARGE_INTESTINE	Unknown	LARGE_INTESTINE	NA	NA	NA	2	Mutant	2.9066	5.26932	2.60897	3.53272	NA	NA	NA	Low	NA	Low_NA
BRD:BRD-K06858286-001-01-3	ACH-000843	-4.17065	CABAZITAXEL	2.5	HARA_LUNG	Male	LUNG	Lung	Non-Small Cell Lung Carcinoma	Squamous Cell Lung Carcinoma	2	Mutant	3.44728	5.638	4.63407	4.43894	NA	4.6809	NA	Low	High	Low_High
BRD:BRD-K06858286-001-01-3	ACH-000845	-0.787678	CABAZITAXEL	2.5	NCIH1373_LUNG	Unknown	LUNG	NA	NA	NA	2	Mutant	2.89564	2.85287	4.65099	2.88623	NA	NA	NA	Low	NA	Low_NA
BRD:BRD-K06858286-001-01-3	ACH-000846	-1.15832	CABAZITAXEL	2.5	FADU_UPPER_AERODIGESTIVE_TRACT	Male	UPPER_AERODIGESTIVE_TRACT	Head and Neck	Head and Neck Carcinoma	Hypopharyngeal squamous cell carcinoma	1	Mutant	3.65283	5.10899	5.47823	3.96136	3.11668	4.02413	NA	High	High	High_High
BRD:BRD-K06858286-001-01-3	ACH-000847	-1.43102	CABAZITAXEL	2.5	HGC27_STOMACH	Unknown	STOMACH	Stomach	Gastric Carcinoma	NA	0	WT	3.69497	2.18207	4.20921	3.81133	NA	3.58014	NA	Low	High	Low_High
BRD:BRD-K06858286-001-01-3	ACH-000848	-2.77612	CABAZITAXEL	2.5	JHH7_LIVER	Male	LIVER	Liver	Hepatocellular Carcinoma	NA	2	Mutant	4.55287	5.27833	4.2699	4.61212	NA	3.53453	NA	High	Low	High_Low
BRD:BRD-K06858286-001-01-3	ACH-000849	-3.1034	CABAZITAXEL	2.5	MDAMB468_BREAST	Female	BREAST	Breast	Breast Carcinoma	Breast adenocarcinoma	2	Mutant	3.8921	6.53948	3.915	4.96125	4.11236	3.31671	NA	High	Low	High_Low
BRD:BRD-K06858286-001-01-3	ACH-000852	0.136563	CABAZITAXEL	2.5	NCIH1435_LUNG	Female	LUNG	Lung	Non-Small Cell Lung Carcinoma	Lung adenocarcinoma	2	Mutant	3.96038	4.64912	4.33862	3.06534	NA	3.14607	NA	High	Low	High_Low
BRD:BRD-K06858286-001-01-3	ACH-000853	-1.67411	CABAZITAXEL	2.5	NCIH661_LUNG	Male	LUNG	Lung	Non-Small Cell Lung Carcinoma	Lung large cell carcinoma	2	Mutant	3.43843	5.45466	5.08334	4.914	NA	4.55711	NA	Low	High	Low_High
BRD:BRD-K06858286-001-01-3	ACH-000855	-2.7057	CABAZITAXEL	2.5	KYSE150_OESOPHAGUS	Female	OESOPHAGUS	Esophagus	Esophageal Carcinoma	Esophageal Squamous Cell Carcinoma	1	Mutant	4.06675	6.00771	4.44042	5.31714	3.74264	3.92524	-0.18587	High	Low	High_Low
BRD:BRD-K06858286-001-01-3	ACH-000856	-0.995903	CABAZITAXEL	2.5	CAL51_BREAST	Female	BREAST	Breast	Breast Carcinoma	NA	0	WT	4.16595	6.34006	5.33867	5.33401	NA	3.39934	NA	High	Low	High_Low
BRD:BRD-K06858286-001-01-3	ACH-000858	-1.92487	CABAZITAXEL	2.5	KNS62_LUNG	Male	LUNG	Lung	Non-Small Cell Lung Carcinoma	Squamous Cell Lung Carcinoma	2	Mutant	2.17741	5.02901	3.53967	3.77223	2.66006	3.78524	1.65068	Low	Low	Low_Low
BRD:BRD-K06858286-001-01-3	ACH-000859	-3.47266	CABAZITAXEL	2.5	HCC1954_BREAST	Female	BREAST	Breast	Breast Carcinoma	Ductal Breast Carcinoma	2	Mutant	3.1662	6.61007	4.55833	4.86062	3.08361	3.94411	NA	Low	High	Low_High
BRD:BRD-K06858286-001-01-3	ACH-000860	-1.10228	CABAZITAXEL	2.5	NCIH358_LUNG	Male	LUNG	Lung	Non-Small Cell Lung Carcinoma	Lung Adenocarcinoma	0	WT	3.49442	3.04981	5.50777	4.07861	NA	4.89501	NA	High	High	High_High
BRD:BRD-K06858286-001-01-3	ACH-000862	-2.19625	CABAZITAXEL	2.5	KMBC2_URINARY_TRACT	Unknown	URINARY_TRACT	NA	NA	NA	2	Mutant	3.95414	4.96908	5.09553	4.42942	NA	NA	NA	High	NA	High_NA
BRD:BRD-K06858286-001-01-3	ACH-000863	-3.36207	CABAZITAXEL	2.5	DBTRG05MG_CENTRAL_NERVOUS_SYSTEM	Female	CENTRAL_NERVOUS_SYSTEM	Central Nervous System	Glioblastoma	NA	0	WT	3.00173	4.71204	4.47683	4.28576	NA	4.3224	NA	Low	High	Low_High
BRD:BRD-K06858286-001-01-3	ACH-000866	-2.20157	CABAZITAXEL	2.5	NCIH1048_LUNG	Female	LUNG	Lung	Small Cell Lung Carcinoma	NA	1	Mutant	5.22726	5.65383	5.54171	5.47082	2.5666	5.05732	NA	High	High	High_High
BRD:BRD-K06858286-001-01-3	ACH-000868	-2.18245	CABAZITAXEL	2.5	HCC1195_LUNG	Unknown	LUNG	NA	NA	NA	0	WT	4.22954	5.64652	4.24879	4.95979	NA	NA	NA	High	NA	High_NA
BRD:BRD-K06858286-001-01-3	ACH-000869	-3.6172	CABAZITAXEL	2.5	NCIH1568_LUNG	Female	LUNG	Lung	Non-Small Cell Lung Carcinoma	Lung Adenocarcinoma	2	Mutant	3.97718	4.9224	4.22182	5.77526	NA	3.63799	NA	High	Low	High_Low
BRD:BRD-K06858286-001-01-3	ACH-000873	-2.81649	CABAZITAXEL	2.5	KYSE270_OESOPHAGUS	Male	OESOPHAGUS	Esophagus	Esophageal Carcinoma	Esophageal Squamous Cell Carcinoma	0	WT	3.13069	3.0432	3.4366	4.26237	NA	4.38365	0.17048	Low	High	Low_High
BRD:BRD-K06858286-001-01-3	ACH-000875	-2.29593	CABAZITAXEL	2.5	NCIH2347_LUNG	Female	LUNG	Lung	Non-Small Cell Lung Carcinoma	Lung Adenocarcinoma	2	Mutant	2.53374	2.79737	2.89749	2.99821	NA	2.99349	NA	Low	Low	Low_Low
BRD:BRD-K06858286-001-01-3	ACH-000878	-3.91186	CABAZITAXEL	2.5	HCC15_LUNG	Male	LUNG	Lung	Non-Small Cell Lung Carcinoma	Squamous Cell Lung Carcinoma	2	Mutant	4.3808	5.34529	4.20639	6.0777	4.13417	3.43381	NA	High	Low	High_Low
BRD:BRD-K06858286-001-01-3	ACH-000879	-1.51492	CABAZITAXEL	2.5	MFE296_ENDOMETRIUM	Female	ENDOMETRIUM	Endometrium	Endometrial Carcinoma	Endometrial adenocarcinoma	2	Mutant	3.71508	5.00227	5.39855	4.80158	NA	4.74884	NA	High	Low	High_Low
BRD:BRD-K06858286-001-01-3	ACH-000880	-0.97782	CABAZITAXEL	2.5	AGS_STOMACH	Female	STOMACH	Stomach	Gastric Carcinoma	Gastric adenocarcinoma	0	WT	3.40379	5.28431	4.88659	4.75744	NA	4.08573	NA	Low	High	Low_High
BRD:BRD-K06858286-001-01-3	ACH-000881	-2.62844	CABAZITAXEL	2.5	MELJUSO_SKIN	Female	SKIN	Skin	Melanoma	Cutaneous melanoma	0	WT	3.19191	5.39042	3.79222	3.54121	NA	3.3179	NA	Low	Low	Low_Low
BRD:BRD-K06858286-001-01-3	ACH-000882	-2.57265	CABAZITAXEL	2.5	IGR1_SKIN	Male	SKIN	Skin	Melanoma	NA	0	WT	3.54718	3.24577	4.64625	3.59235	NA	4.01697	NA	High	High	High_High
BRD:BRD-K06858286-001-01-3	ACH-000883	-2.03459	CABAZITAXEL	2.5	SW1783_CENTRAL_NERVOUS_SYSTEM	Male	CENTRAL_NERVOUS_SYSTEM	Central Nervous System	Glioma	Low Grade Glioma	2	Mutant	3.07332	5.638	4.66303	3.99693	4.88772	3.67577	NA	Low	Low	Low_Low
BRD:BRD-K06858286-001-01-3	ACH-000884	-3.95751	CABAZITAXEL	2.5	MDAMB435S_SKIN	Unknown	SKIN	NA	NA	NA	1	Mutant	3.74627	6.19153	4.29071	4.52409	NA	NA	NA	High	NA	High_NA
BRD:BRD-K06858286-001-01-3	ACH-000885	-3.54714	CABAZITAXEL	2.5	TOV21G_OVARY	Female	OVARY	Ovary	Ovarian Carcinoma	Ovarian clear cell adenocarcinoma	0	WT	3.51863	5.48757	4.89512	4.64395	NA	5.06559	NA	High	High	High_High
BRD:BRD-K06858286-001-01-3	ACH-000886	-1.09269	CABAZITAXEL	2.5	NCIH2009_LUNG	Female	LUNG	Lung	Non-Small Cell Lung Carcinoma	Lung Adenocarcinoma	2	Mutant	3.36432	5.93987	4.42097	4.00592	4.49016	3.55201	NA	Low	Low	Low_Low
BRD:BRD-K06858286-001-01-3	ACH-000888	-1.18415	CABAZITAXEL	2.5	NCIH1793_LUNG	Female	LUNG	Lung	Non-Small Cell Lung Carcinoma	Lung Adenocarcinoma	1	Mutant	3.93254	4.02424	4.88479	4.10322	NA	4.13051	NA	High	High	High_High
BRD:BRD-K06858286-001-01-3	ACH-000890	-4.21001	CABAZITAXEL	2.5	SW1271_LUNG	Male	LUNG	Lung	Small Cell Lung Carcinoma	NA	2	Mutant	3.28768	6.82797	4.24948	3.67992	5.28439	3.28598	NA	Low	Low	Low_Low
BRD:BRD-K06858286-001-01-3	ACH-000891	-3.54811	CABAZITAXEL	2.5	HCC1438_LUNG	Unknown	LUNG	NA	NA	NA	0	WT	4.25306	2.90276	5.70848	5.02023	NA	NA	NA	High	NA	High_NA
BRD:BRD-K06858286-001-01-3	ACH-000892	-0.221042	CABAZITAXEL	2.5	NCIH1563_LUNG	Male	LUNG	Lung	Non-Small Cell Lung Carcinoma	Lung Adenocarcinoma	0	WT	3.44223	4.70055	4.60672	4.03611	NA	3.80468	NA	Low	Low	Low_Low
BRD:BRD-K06858286-001-01-3	ACH-000893	-2.10028	CABAZITAXEL	2.5	NCIH1651_LUNG	Male	LUNG	Lung	Non-Small Cell Lung Carcinoma	Lung Adenocarcinoma	2	Mutant	4.32701	6.08426	5.82905	5.03278	3.11851	4.30848	NA	High	High	High_High
BRD:BRD-K06858286-001-01-3	ACH-000895	-1.38568	CABAZITAXEL	2.5	CL34_LARGE_INTESTINE	Unknown	LARGE_INTESTINE	NA	NA	NA	1	Mutant	3.74215	6.23927	3.65759	3.63959	NA	NA	NA	High	NA	High_NA
BRD:BRD-K06858286-001-01-3	ACH-000896	-3.13949	CABAZITAXEL	2.5	647V_URINARY_TRACT	Male	URINARY_TRACT	Bladder	Bladder Carcinoma	NA	1	Mutant	3.65502	5.6938	3.95297	4.39839	NA	3.11197	NA	High	Low	High_Low
BRD:BRD-K06858286-001-01-3	ACH-000897	-1.46121	CABAZITAXEL	2.5	FTC238_THYROID	Unknown	THYROID	NA	NA	NA	2	Mutant	3.1197	5.67352	4.72884	4.03874	NA	NA	NA	Low	NA	Low_NA
BRD:BRD-K06858286-001-01-3	ACH-000898	-2.19669	CABAZITAXEL	2.5	SNU719_STOMACH	Unknown	STOMACH	NA	NA	NA	0	WT	4.59509	5.99057	3.8225	4.194	NA	NA	NA	High	NA	High_NA
BRD:BRD-K06858286-001-01-3	ACH-000899	-0.9308	CABAZITAXEL	2.5	WM88_SKIN	Unknown	SKIN	NA	NA	NA	0	WT	3.80179	5.52994	5.36613	3.39819	NA	NA	NA	High	NA	High_NA
BRD:BRD-K06858286-001-01-3	ACH-000900	-2.16433	CABAZITAXEL	2.5	NCIH23_LUNG	Male	LUNG	Lung	Non-Small Cell Lung Carcinoma	Lung Adenocarcinoma	2	Mutant	3.03546	4.91479	4.35085	3.42839	2.67889	4.4529	NA	Low	High	Low_High
BRD:BRD-K06858286-001-01-3	ACH-000901	-4.10534	CABAZITAXEL	2.5	HCC1359_LUNG	Unknown	LUNG	NA	NA	NA	2	Mutant	2.87161	5.96732	4.48799	3.63048	NA	NA	NA	Low	NA	Low_NA
BRD:BRD-K06858286-001-01-3	ACH-000903	-0.677976	CABAZITAXEL	2.5	FTC133_THYROID	Male	THYROID	Thyroid	Thyroid Gland Carcinoma	Thyroid gland follicular carcinoma	2	Mutant	2.29777	5.94947	5.61965	3.51437	1.17427	5.17453	NA	Low	High	Low_High
BRD:BRD-K06858286-001-01-3	ACH-000905	-4.60069	CABAZITAXEL	2.5	5637_URINARY_TRACT	Male	URINARY_TRACT	Bladder	Bladder Carcinoma	NA	2	Mutant	2.62023	5.919	3.73461	3.62247	NA	3.45833	NA	Low	Low	Low_Low
BRD:BRD-K06858286-001-01-3	ACH-000906	-3.15716	CABAZITAXEL	2.5	ES2_OVARY	Female	OVARY	Ovary	Ovarian Carcinoma	Ovarian clear cell adenocarcinoma	2	Mutant	2.71234	5.49892	4.02935	3.56639	3.07477	4.02938	NA	Low	Low	Low_Low
BRD:BRD-K06858286-001-01-3	ACH-000909	-2.17255	CABAZITAXEL	2.5	JHUEM2_ENDOMETRIUM	Female	ENDOMETRIUM	NA	NA	NA	0	WT	4.17443	6.58957	5.02986	4.47051	NA	NA	NA	High	NA	High_NA
BRD:BRD-K06858286-001-01-3	ACH-000911	-3.81389	CABAZITAXEL	2.5	NUGC3_STOMACH	Male	STOMACH	Stomach	Gastric Carcinoma	Gastric adenocarcinoma	2	Mutant	3.8553	6.06466	3.54295	4.31543	3.41685	3.40994	NA	High	Low	High_Low
BRD:BRD-K06858286-001-01-3	ACH-000913	-2.85759	CABAZITAXEL	2.5	ESS1_ENDOMETRIUM	Female	ENDOMETRIUM	Soft Tissue	Other Sarcomas	Endometrial Stromal Sarcoma	2	Mutant	3.03879	4.10233	5.04493	4.68677	NA	4.21407	NA	Low	Low	Low_Low
BRD:BRD-K06858286-001-01-3	ACH-000915	-1.8239	CABAZITAXEL	2.5	IPC298_SKIN	Female	SKIN	Skin	Melanoma	Cutaneous melanoma	2	Mutant	3.55774	2.20248	3.53638	3.63732	NA	2.81065	NA	High	Low	High_Low
BRD:BRD-K06858286-001-01-3	ACH-000916	-2.69917	CABAZITAXEL	2.5	NCIH1573_LUNG	Female	LUNG	Lung	Non-Small Cell Lung Carcinoma	Lung Adenocarcinoma	2	Mutant	3.99293	4.97459	5.35395	3.93999	NA	4.96934	NA	High	High	High_High
BRD:BRD-K06858286-001-01-3	ACH-000917	-1.30564	CABAZITAXEL	2.5	TE4_OESOPHAGUS	Female	OESOPHAGUS	Esophagus	Esophageal Carcinoma	Esophageal Squamous Cell Carcinoma	2	Mutant	3.66918	4.8796	5.27772	3.2274	2.69171	4.86848	NA	High	High	High_High
BRD:BRD-K06858286-001-01-3	ACH-000919	-3.61031	CABAZITAXEL	2.5	IM95_STOMACH	Male	STOMACH	Stomach	Gastric Carcinoma	Gastric adenocarcinoma	0	WT	4.13151	5.12814	2.9994	4.20587	NA	2.59072	NA	High	Low	High_Low
BRD:BRD-K06858286-001-01-3	ACH-000921	-2.48459	CABAZITAXEL	2.5	NCIH1339_LUNG	Unknown	LUNG	NA	NA	NA	1	Mutant	2.95493	3.67455	5.18383	4.6224	NA	NA	NA	Low	NA	Low_NA
BRD:BRD-K06858286-001-01-3	ACH-000924	-2.95914	CABAZITAXEL	2.5	NCIH2172_LUNG	Female	LUNG	Lung	Non-Small Cell Lung Carcinoma	NA	0	WT	3.20979	3.30255	4.9067	4.27298	NA	4.79491	2.08447	Low	High	Low_High
BRD:BRD-K06858286-001-01-3	ACH-000926	-1.25191	CABAZITAXEL	2.5	HT55_LARGE_INTESTINE	Unknown	LARGE_INTESTINE	Large Intestine	Colorectal Carcinoma	NA	0	WT	3.64734	5.80588	4.06692	3.4808	NA	4.05536	NA	Low	High	Low_High
BRD:BRD-K06858286-001-01-3	ACH-000927	-1.01081	CABAZITAXEL	2.5	BT474_BREAST	Female	BREAST	Breast	Breast Carcinoma	Invasive Ductal Carcinoma of No Special Type	2	Mutant	3.44097	6.09821	3.49184	3.93437	2.81321	3.58819	NA	High	Low	High_Low
BRD:BRD-K06858286-001-01-3	ACH-000929	-3.76574	CABAZITAXEL	2.5	NCIH2110_LUNG	Unknown	LUNG	Lung	Non-Small Cell Lung Carcinoma	NA	2	Mutant	3.7555	5.86351	4.03883	3.07516	3.17064	3.598	NA	High	Low	High_Low
BRD:BRD-K06858286-001-01-3	ACH-000934	0.624369	CABAZITAXEL	2.5	MDAMB361_BREAST	Female	BREAST	Breast	Breast Carcinoma	Breast adenocarcinoma	1	Mutant	3.42185	3.97874	4.39754	3.66324	NA	3.52295	NA	Low	Low	Low_Low
BRD:BRD-K06858286-001-01-3	ACH-000936	-0.754922	CABAZITAXEL	2.5	EFO27_OVARY	Female	OVARY	Ovary	Ovarian Carcinoma	Ovarian mucinous adenocarcinoma	1	Mutant	3.16772	5.95545	4.44103	4.15539	2.94259	3.83147	NA	Low	Low	Low_Low
BRD:BRD-K06858286-001-01-3	ACH-000939	-4.25621	CABAZITAXEL	2.5	SKUT1_SOFT_TISSUE	Female	SOFT_TISSUE	Soft Tissue	Leiomyosarcoma	Uterine Corpus Leiomyosarcoma	2	Mutant	3.80179	6.61407	5.00552	4.95201	4.0729	3.38202	NA	High	Low	High_Low
BRD:BRD-K06858286-001-01-3	ACH-000940	-3.82983	CABAZITAXEL	2.5	AN3CA_ENDOMETRIUM	Female	ENDOMETRIUM	Endometrium	Endometrial Carcinoma	Endometrial adenocarcinoma	1	Mutant	3.70135	5.0691	5.86672	5.05667	NA	4.95691	NA	High	High	High_High
BRD:BRD-K06858286-001-01-3	ACH-000941	-2.20501	CABAZITAXEL	2.5	HEC1B_ENDOMETRIUM	Female	ENDOMETRIUM	NA	NA	NA	2	Mutant	3.6583	6.32298	4.7876	3.63277	NA	NA	NA	High	NA	High_NA
BRD:BRD-K06858286-001-01-3	ACH-000943	-5.09814	CABAZITAXEL	2.5	RKO_LARGE_INTESTINE	Unknown	LARGE_INTESTINE	Large Intestine	Colorectal Carcinoma	NA	0	WT	3.41414	3.20916	3.77451	3.90499	NA	3.28579	NA	Low	Low	Low_Low
BRD:BRD-K06858286-001-01-3	ACH-000945	-0.675833	CABAZITAXEL	2.5	NCIH650_LUNG	Male	LUNG	Lung	Non-Small Cell Lung Carcinoma	Lung Adenocarcinoma	2	Mutant	3.2636	3.97786	5.44282	4.3014	NA	4.22009	NA	Low	High	Low_High
BRD:BRD-K06858286-001-01-3	ACH-000946	-3.7119	CABAZITAXEL	2.5	HEC265_ENDOMETRIUM	Female	ENDOMETRIUM	NA	NA	NA	0	WT	2.87533	5.18772	3.99246	3.83853	NA	NA	NA	Low	NA	Low_NA
BRD:BRD-K06858286-001-01-3	ACH-000947	-2.31721	CABAZITAXEL	2.5	OVK18_OVARY	Female	OVARY	Ovary	Ovarian Carcinoma	Ovarian endometrioid adenocarcinoma	0	WT	3.99727	5.40768	4.62875	4.31543	NA	4.04931	NA	High	Low	High_Low
BRD:BRD-K06858286-001-01-3	ACH-000948	-3.96494	CABAZITAXEL	2.5	2313287_STOMACH	Male	STOMACH	Stomach	Gastric Carcinoma	Gastric adenocarcinoma	0	WT	4.45702	6.3123	3.1326	4.0614	NA	NA	NA	High	NA	High_NA
BRD:BRD-K06858286-001-01-3	ACH-000950	-0.863838	CABAZITAXEL	2.5	LOVO_LARGE_INTESTINE	Male	LARGE_INTESTINE	Large Intestine	Colorectal Carcinoma	Colon adenocarcinoma	0	WT	3.60718	5.06695	4.0646	4.23476	NA	4.28302	NA	Low	High	Low_High
BRD:BRD-K06858286-001-01-3	ACH-000954	-1.90117	CABAZITAXEL	2.5	HEC1A_ENDOMETRIUM	Female	ENDOMETRIUM	NA	NA	NA	2	Mutant	3.78986	6.24813	4.58107	4.82451	NA	NA	NA	High	NA	High_NA
BRD:BRD-K06858286-001-01-3	ACH-000955	-2.61271	CABAZITAXEL	2.5	SNU407_LARGE_INTESTINE	Male	LARGE_INTESTINE	Large Intestine	Colorectal Carcinoma	Colon adenocarcinoma	0	WT	3.93344	6.39624	5.43938	4.18204	NA	4.73236	NA	High	High	High_High
BRD:BRD-K06858286-001-01-3	ACH-000956	-1.9439	CABAZITAXEL	2.5	22RV1_PROSTATE	Male	PROSTATE	Prostate	Prostate Carcinoma	NA	0	WT	4.36939	4.13551	4.36106	3.95766	NA	3.54269	NA	High	Low	High_Low
BRD:BRD-K06858286-001-01-3	ACH-000957	-0.0920711	CABAZITAXEL	2.5	LS180_LARGE_INTESTINE	Female	LARGE_INTESTINE	Large Intestine	Colorectal Carcinoma	Colon adenocarcinoma	0	WT	3.79981	6.39053	3.87077	4.23399	NA	3.84817	NA	High	Low	High_Low
BRD:BRD-K06858286-001-01-3	ACH-000959	-3.55879	CABAZITAXEL	2.5	SNUC4_LARGE_INTESTINE	Unknown	LARGE_INTESTINE	NA	NA	NA	1	Mutant	4.44874	6.0956	4.16711	4.17963	NA	NA	NA	High	NA	High_NA
BRD:BRD-K06858286-001-01-3	ACH-000961	-3.94538	CABAZITAXEL	2.5	ISHIKAWAHERAKLIO02ER_ENDOMETRIUM	Female	ENDOMETRIUM	NA	NA	NA	1	Mutant	4.01195	4.57629	4.91158	4.1258	NA	NA	NA	High	NA	High_NA
BRD:BRD-K06858286-001-01-3	ACH-000962	-3.40774	CABAZITAXEL	2.5	OC314_OVARY	Female	OVARY	Ovary	Ovarian Carcinoma	Ovarian serous adenocarcinoma	2	Mutant	3.66484	5.71913	3.80973	4.65757	4.37555	3.7293	NA	High	Low	High_Low
BRD:BRD-K06858286-001-01-3	ACH-000963	-3.2038	CABAZITAXEL	2.5	CCK81_LARGE_INTESTINE	Female	LARGE_INTESTINE	Large Intestine	Colorectal Carcinoma	Colon adenocarcinoma	1	Mutant	3.78686	6.47893	3.5031	4.17803	NA	3.0934	NA	High	Low	High_Low
BRD:BRD-K06858286-001-01-3	ACH-000965	-4.64703	CABAZITAXEL	2.5	RL952_ENDOMETRIUM	Female	ENDOMETRIUM	Endometrium	Endometrial Carcinoma	Endometrial adenosquamous carcinoma	0	WT	3.48339	5.42814	4.78616	4.57464	NA	4.86843	NA	Low	Low	Low_Low
BRD:BRD-K06858286-001-01-3	ACH-000966	-1.56091	CABAZITAXEL	2.5	IGROV1_OVARY	Female	OVARY	Ovary	Ovarian Carcinoma	Ovarian endometrioid adenocarcinoma	1	Mutant	3.8097	5.1161	4.59804	4.31101	NA	4.97933	NA	High	High	High_High
BRD:BRD-K06858286-001-01-3	ACH-000967	-1.86962	CABAZITAXEL	2.5	SNUC2A_LARGE_INTESTINE	Unknown	LARGE_INTESTINE	NA	NA	NA	2	Mutant	4.46462	5.96543	5.15923	4.48243	NA	NA	NA	High	NA	High_NA
BRD:BRD-K06858286-001-01-3	ACH-000968	-2.19574	CABAZITAXEL	2.5	COLO792_SKIN	Male	SKIN	Skin	Melanoma	NA	0	WT	2.94255	4.25619	3.26555	1.87953	NA	3.6784	NA	Low	Low	Low_Low
BRD:BRD-K06858286-001-01-3	ACH-000970	-0.893714	CABAZITAXEL	2.5	NA	Female	NA	Large Intestine	Colorectal Carcinoma	Cecum adenocarcinoma	1	Mutant	4.0501	5.86654	4.90892	4.43962	3.16171	3.99442	NA	High	High	High_High
BRD:BRD-K06858286-001-01-3	ACH-000971	-2.30914	CABAZITAXEL	2.5	HCT116_LARGE_INTESTINE	Male	LARGE_INTESTINE	Large Intestine	Colorectal Carcinoma	NA	0	WT	4.05512	4.92382	4.61482	4.20429	NA	3.95291	NA	High	High	High_High
BRD:BRD-K06858286-001-01-3	ACH-000972	-0.614159	CABAZITAXEL	2.5	HEC151_ENDOMETRIUM	Female	ENDOMETRIUM	NA	NA	NA	0	WT	2.90295	5.47219	4.27057	3.66101	NA	NA	NA	Low	NA	Low_NA
BRD:BRD-K06858286-001-01-3	ACH-000973	-4.13356	CABAZITAXEL	2.5	639V_URINARY_TRACT	Male	URINARY_TRACT	Bladder	Bladder Carcinoma	NA	2	Mutant	3.27498	6.33451	4.62394	4.46184	5.46551	4.24093	1.00833	Low	High	Low_High
BRD:BRD-K06858286-001-01-3	ACH-000974	-4.24241	CABAZITAXEL	2.5	SNGM_ENDOMETRIUM	Female	ENDOMETRIUM	Endometrium	Endometrial Carcinoma	Endometrial adenocarcinoma	0	WT	3.00854	6.2027	4.30927	3.98698	NA	5.08051	NA	Low	High	Low_High
BRD:BRD-K06858286-001-01-3	ACH-000976	-5.05441	CABAZITAXEL	2.5	HUCCT1_BILIARY_TRACT	Male	BILIARY_TRACT	Biliary Tract	Biliary Tract Carcinoma	Intrahepatic Cholangiocarcinoma	2	Mutant	2.50533	4.82343	2.611	1.7318	NA	3.46989	NA	Low	Low	Low_Low
BRD:BRD-K06858286-001-01-3	ACH-000977	-3.07161	CABAZITAXEL	2.5	LNCAPCLONEFGC_PROSTATE	Male	PROSTATE	Prostate	Prostate Carcinoma	NA	0	WT	3.1859	6.15189	4.45425	3.89346	NA	3.11928	NA	Low	Low	Low_Low
BRD:BRD-K06858286-001-01-3	ACH-000978	-0.0189899	CABAZITAXEL	2.5	EN_ENDOMETRIUM	Female	ENDOMETRIUM	Endometrium	Endometrial Carcinoma	NA	1	Mutant	4.27334	5.55909	5.49398	4.53497	3.11506	5.17999	NA	High	High	High_High
BRD:BRD-K06858286-001-01-3	ACH-000979	-2.18689	CABAZITAXEL	2.5	DU145_PROSTATE	Male	PROSTATE	Prostate	Prostate Carcinoma	NA	1	Mutant	NA	NA	NA	NA	3.07965	4.13417	NA	NA	High	NA_High
BRD:BRD-K06858286-001-01-3	ACH-000982	-3.72287	CABAZITAXEL	2.5	GP2D_LARGE_INTESTINE	Unknown	LARGE_INTESTINE	NA	NA	NA	0	WT	4.5829	6.22519	4.68837	4.96028	NA	NA	NA	High	NA	High_NA
BRD:BRD-K06858286-001-01-3	ACH-000984	-1.20884	CABAZITAXEL	2.5	HEC6_ENDOMETRIUM	Female	ENDOMETRIUM	NA	NA	NA	1	Mutant	3.96924	5.52614	5.37853	4.53625	NA	NA	NA	High	NA	High_NA
BRD:BRD-K06858286-001-01-3	ACH-000985	-3.26053	CABAZITAXEL	2.5	LS411N_LARGE_INTESTINE	Male	LARGE_INTESTINE	Large Intestine	Colorectal Carcinoma	Cecum adenocarcinoma	0	WT	3.83994	3.43832	3.81339	4.37523	NA	3.41208	NA	High	Low	High_Low
BRD:BRD-K06858286-001-01-3	ACH-000986	-2.31549	CABAZITAXEL	2.5	HT115_LARGE_INTESTINE	Unknown	LARGE_INTESTINE	Large Intestine	Colorectal Carcinoma	NA	1	Mutant	3.14314	2.38497	3.08161	3.19601	NA	3.73572	NA	Low	Low	Low_Low
BRD:BRD-K06858286-001-01-3	ACH-000987	-3.33472	CABAZITAXEL	2.5	MEWO_SKIN	Male	SKIN	Skin	Melanoma	Cutaneous melanoma	2	Mutant	3.28205	4.43035	5.09396	3.44777	NA	4.2942	NA	Low	High	Low_High
BRD:BRD-K06858286-001-01-3	ACH-000988	-3.03763	CABAZITAXEL	2.5	MFE319_ENDOMETRIUM	Female	ENDOMETRIUM	Endometrium	Endometrial Carcinoma	Endometrial adenosquamous carcinoma	2	Mutant	4.17289	6.35055	4.66875	3.55565	NA	5.18998	NA	High	High	High_High
BRD:BRD-K06858286-001-01-3	ACH-000990	-4.39477	CABAZITAXEL	2.5	HEC108_ENDOMETRIUM	Female	ENDOMETRIUM	NA	NA	NA	1	Mutant	3.54482	5.9595	5.02412	4.64633	NA	NA	NA	Low	NA	Low_NA
BRD:BRD-K06858286-001-01-3	ACH-000991	-3.18024	CABAZITAXEL	2.5	SNU81_LARGE_INTESTINE	Male	LARGE_INTESTINE	Large Intestine	Colorectal Carcinoma	Colon adenocarcinoma	2	Mutant	3.61732	5.98239	4.93834	4.22155	3.43332	3.62767	NA	Low	Low	Low_Low
BRD:BRD-K06858286-001-01-3	ACH-000994	-1.32757	CABAZITAXEL	2.5	HEC59_ENDOMETRIUM	Female	ENDOMETRIUM	NA	NA	NA	1	Mutant	5.40162	5.69068	4.31387	5.10691	NA	NA	NA	High	NA	High_NA
BRD:BRD-K06858286-001-01-3	ACH-000996	-1.00708	CABAZITAXEL	2.5	HEC251_ENDOMETRIUM	Female	ENDOMETRIUM	NA	NA	NA	1	Mutant	3.26217	4.74708	4.14965	3.93249	NA	NA	NA	Low	NA	Low_NA
BRD:BRD-K06858286-001-01-3	ACH-000997	-2.09316	CABAZITAXEL	2.5	HCT15_LARGE_INTESTINE	Male	LARGE_INTESTINE	Large Intestine	Colorectal Carcinoma	Colon adenocarcinoma	1	Mutant	4.35721	5.61814	4.20568	4.67165	1.80863	3.58647	1.94504	High	Low	High_Low
BRD:BRD-K06858286-001-01-3	ACH-000998	-3.05064	CABAZITAXEL	2.5	CW2_LARGE_INTESTINE	Female	LARGE_INTESTINE	Large Intestine	Colorectal Carcinoma	Colon adenocarcinoma	0	WT	3.90601	6.77418	3.41059	2.11148	NA	2.83418	NA	High	Low	High_Low
BRD:BRD-K06858286-001-01-3	ACH-001007	-3.93299	CABAZITAXEL	2.5	NA	Unknown	NA	NA	NA	NA	NA	NA	NA	NA	NA	NA	NA	NA	NA	NA	NA	NA_NA
BRD:BRD-K06858286-001-01-3	ACH-001008	-2.91689	CABAZITAXEL	2.5	NA	Unknown	NA	NA	NA	NA	NA	NA	NA	NA	NA	NA	NA	NA	NA	NA	NA	NA_NA
BRD:BRD-K06858286-001-01-3	ACH-001009	-2.51453	CABAZITAXEL	2.5	NA	Unknown	NA	NA	NA	NA	NA	NA	NA	NA	NA	NA	NA	NA	NA	NA	NA	NA_NA
BRD:BRD-K06858286-001-01-3	ACH-001010	-2.76483	CABAZITAXEL	2.5	NA	Unknown	NA	NA	NA	NA	NA	NA	NA	NA	NA	NA	NA	NA	NA	NA	NA	NA_NA
BRD:BRD-K06858286-001-01-3	ACH-001016	-3.57607	CABAZITAXEL	2.5	BECKER_CENTRAL_NERVOUS_SYSTEM	Male	CENTRAL_NERVOUS_SYSTEM	Central Nervous System	Glioma	Low Grade Glioma	0	WT	4.00831	6.56305	5.39796	4.08765	3.26765	4.1196	NA	High	Low	High_Low
BRD:BRD-K06858286-001-01-3	ACH-001022	-3.58963	CABAZITAXEL	2.5	CBAGPN_BONE	Unknown	BONE	NA	NA	NA	0	WT	4.19316	6.96049	5.46173	5.00134	NA	NA	NA	High	NA	High_NA
BRD:BRD-K06858286-001-01-3	ACH-001024	-3.15301	CABAZITAXEL	2.5	CHL1_SKIN	Female	SKIN	Skin	Melanoma	NA	2	Mutant	NA	NA	NA	NA	NA	3.21463	NA	NA	Low	NA_Low
BRD:BRD-K06858286-001-01-3	ACH-001029	-2.41993	CABAZITAXEL	2.5	CHLA10_BONE	Unknown	BONE	NA	NA	NA	0	WT	4.18038	6.76422	5.63586	5.23228	NA	NA	NA	High	NA	High_NA
BRD:BRD-K06858286-001-01-3	ACH-001075	-1.49983	CABAZITAXEL	2.5	NCIH292_LUNG	Female	LUNG	Lung	Other Solid Carcinomas	Lung mucoepidermoid carcinoma	0	WT	3.0619	5.24657	4.02697	4.34454	NA	3.69648	NA	Low	Low	Low_Low
BRD:BRD-K06858286-001-01-3	ACH-001099	-3.16147	CABAZITAXEL	2.5	KD_SOFT_TISSUE	Unknown	SOFT_TISSUE	NA	NA	NA	0	WT	3.06517	5.85512	4.83907	3.66771	NA	NA	NA	Low	NA	Low_NA
BRD:BRD-K06858286-001-01-3	ACH-001113	-0.617124	CABAZITAXEL	2.5	LC1SQSF_LUNG	Unknown	LUNG	NA	NA	NA	2	Mutant	4.13689	4.97821	5.18961	4.11247	NA	NA	NA	High	NA	High_NA
BRD:BRD-K06858286-001-01-3	ACH-001128	-1.45379	CABAZITAXEL	2.5	MON_SOFT_TISSUE	Unknown	SOFT_TISSUE	NA	NA	NA	0	WT	5.23251	5.93721	6.0149	4.32495	NA	NA	NA	High	NA	High_NA
BRD:BRD-K06858286-001-01-3	ACH-001145	-4.18952	CABAZITAXEL	2.5	OC316_OVARY	Female	OVARY	NA	NA	NA	2	Mutant	3.88581	5.85877	4.70278	5.28737	NA	NA	NA	High	NA	High_NA
BRD:BRD-K06858286-001-01-3	ACH-001163	-1.76406	CABAZITAXEL	2.5	PEDS005TADH_KIDNEY	Unknown	KIDNEY	NA	NA	NA	1	Mutant	4.29616	6.2311	4.59992	4.01203	NA	NA	NA	High	NA	High_NA
BRD:BRD-K06858286-001-01-3	ACH-001163	-1.76406	CABAZITAXEL	2.5	PEDS005TSUSP_KIDNEY	Unknown	KIDNEY	NA	NA	NA	1	Mutant	4.29616	6.2311	4.59992	4.01203	NA	NA	NA	High	NA	High_NA
BRD:BRD-K06858286-001-01-3	ACH-001190	-4.32011	CABAZITAXEL	2.5	SKMEL2_SKIN	Male	SKIN	Skin	Melanoma	NA	2	Mutant	3.87412	4.38406	4.78652	3.66114	NA	3.5824	NA	High	Low	High_Low
BRD:BRD-K06858286-001-01-3	ACH-001192	-3.46865	CABAZITAXEL	2.5	SKNEP1_BONE	Unknown	BONE	NA	NA	NA	2	Mutant	4.37206	6.91095	5.77103	4.71579	NA	NA	NA	High	NA	High_NA
BRD:BRD-K06858286-001-01-3	ACH-001193	-2.79976	CABAZITAXEL	2.5	SKPNDW_BONE	Male	BONE	Other tissue	Other Solid Carcinomas	Primitive Neuroectodermal Tumor	2	Mutant	4.14961	5.92315	5.10452	3.37549	2.01345	3.66588	NA	High	Low	High_Low
BRD:BRD-K06858286-001-01-3	ACH-001200	0.657755	CABAZITAXEL	2.5	STM9101_SOFT_TISSUE	Unknown	SOFT_TISSUE	NA	NA	NA	0	WT	5.07059	5.36838	4.03962	4.37876	NA	NA	NA	High	NA	High_NA
BRD:BRD-K06858286-001-01-3	ACH-001205	-3.8166	CABAZITAXEL	2.5	TC32_BONE	Unknown	BONE	NA	NA	NA	0	WT	NA	NA	NA	NA	NA	NA	NA	NA	NA	NA_NA
BRD:BRD-K06858286-001-01-3	ACH-001210	-1.90575	CABAZITAXEL	2.5	TTC1240_SOFT_TISSUE	Unknown	SOFT_TISSUE	NA	NA	NA	0	WT	4.06923	6.32615	5.85704	3.91357	NA	NA	NA	High	NA	High_NA
BRD:BRD-K06858286-001-01-3	ACH-001211	-2.66688	CABAZITAXEL	2.5	TTC549_SOFT_TISSUE	Unknown	SOFT_TISSUE	NA	NA	NA	0	WT	3.57055	5.1335	5.68875	4.50535	NA	NA	NA	High	NA	High_NA
BRD:BRD-K06858286-001-01-3	ACH-001212	-2.39133	CABAZITAXEL	2.5	TTC642_SOFT_TISSUE	Unknown	SOFT_TISSUE	NA	NA	NA	NA	NA	NA	NA	NA	NA	NA	NA	NA	NA	NA	NA_NA
BRD:BRD-K06858286-001-01-3	ACH-001239	-1.47426	CABAZITAXEL	2.5	WM2664_SKIN	Unknown	SKIN	NA	NA	NA	0	WT	3.9657	4.91289	4.60347	4.04924	NA	NA	NA	High	NA	High_NA
BRD:BRD-K06858286-001-01-3	ACH-001306	-4.95489	CABAZITAXEL	2.5	8305C_THYROID	Female	THYROID	Thyroid	Thyroid Gland Carcinoma	Thyroid gland anaplastic carcinoma	2	Mutant	3.21127	6.01872	4.78038	4.26465	3.3372	4.22579	NA	High	High	High_High
BRD:BRD-K06858286-001-01-3	ACH-001307	-1.92146	CABAZITAXEL	2.5	8505C_THYROID	Female	THYROID	Thyroid	Thyroid Gland Carcinoma	Thyroid gland anaplastic carcinoma	2	Mutant	2.69774	6.10643	4.45844	4.62902	4.32985	3.33133	NA	Low	Low	Low_Low
BRD:BRD-K06858286-001-01-3	ACH-001318	-3.14556	CABAZITAXEL	2.5	PLCPRF5_LIVER	Unknown	LIVER	NA	NA	NA	2	Mutant	5.45189	4.07425	4.985	4.74857	NA	NA	NA	High	NA	High_NA
BRD:BRD-K06858286-001-01-3	ACH-001321	-0.157861	CABAZITAXEL	2.5	TT_THYROID	Female	THYROID	Thyroid	Thyroid Gland Carcinoma	Hereditary thyroid gland medullary carcinoma	0	WT	3.69497	4.21273	5.82276	3.60284	NA	5.1437	NA	High	High	High_High
BRD:BRD-K30577245-001-04-3	ACH-000001	0.250035	DOCETAXEL	2.5	NIHOVCAR3_OVARY	Female	OVARY	Ovary	Ovarian Carcinoma	High grade ovarian serous adenocarcinoma	2	Mutant	3.03713	5.65674	5.02699	3.56877	2.03756	4.37572	NA	Low	High	Low_High
BRD:BRD-K30577245-001-04-3	ACH-000007	-2.07829	DOCETAXEL	2.5	LS513_LARGE_INTESTINE	Male	LARGE_INTESTINE	Large Intestine	Colorectal Carcinoma	Cecum adenocarcinoma	0	WT	3.23476	5.95091	4.24605	3.68324	NA	4.20772	NA	Low	High	Low_High
BRD:BRD-K30577245-001-04-3	ACH-000008	-0.939513	DOCETAXEL	2.5	A101D_SKIN	Unknown	SKIN	NA	NA	NA	0	WT	3.54246	4.44084	4.16639	3.64412	NA	NA	NA	High	NA	High_NA
BRD:BRD-K30577245-001-04-3	ACH-000011	-3.04058	DOCETAXEL	2.5	253J_URINARY_TRACT	Unknown	URINARY_TRACT	NA	NA	NA	0	WT	3.12599	5.41077	4.38694	3.32351	NA	NA	NA	Low	NA	Low_NA
BRD:BRD-K30577245-001-04-3	ACH-000013	-0.749373	DOCETAXEL	2.5	ONCODG1_OVARY	Female	OVARY	NA	NA	NA	2	Mutant	3.01531	6.09777	4.29803	3.72998	NA	NA	NA	Low	NA	Low_NA
BRD:BRD-K30577245-001-04-3	ACH-000014	-2.02332	DOCETAXEL	2.5	HS294T_SKIN	Unknown	SKIN	NA	NA	NA	0	WT	3.75448	5.86806	3.86283	3.42448	NA	NA	NA	High	NA	High_NA
BRD:BRD-K30577245-001-04-3	ACH-000015	-1.61019	DOCETAXEL	2.5	NCIH1581_LUNG	Male	LUNG	Lung	Non-Small Cell Lung Carcinoma	Lung large cell carcinoma	2	Mutant	3.33332	2.40535	3.86548	4.54578	NA	3.9951	NA	Low	High	Low_High
BRD:BRD-K30577245-001-04-3	ACH-000018	-1.50081	DOCETAXEL	2.5	T24_URINARY_TRACT	Female	URINARY_TRACT	Bladder	Bladder Carcinoma	NA	0	WT	3.18138	3.36263	5.36645	4.66287	NA	4.46353	NA	Low	High	Low_High
BRD:BRD-K30577245-001-04-3	ACH-000019	-1.54647	DOCETAXEL	2.5	MCF7_BREAST	Female	BREAST	Breast	Breast Carcinoma	Invasive Ductal Carcinoma of No Special Type	0	WT	3.50173	6.3123	3.90643	2.99134	NA	4.06704	NA	High	High	High_High
BRD:BRD-K30577245-001-04-3	ACH-000021	-3.21689	DOCETAXEL	2.5	NCIH1693_LUNG	Female	LUNG	Lung	Non-Small Cell Lung Carcinoma	Lung Adenocarcinoma	0	WT	3.6374	4.05833	3.88304	4.59441	NA	3.57091	NA	High	Low	High_Low
BRD:BRD-K30577245-001-04-3	ACH-000022	-0.490292	DOCETAXEL	2.5	PATU8988S_PANCREAS	Unknown	PANCREAS	NA	NA	NA	2	Mutant	3.87429	5.51019	3.45292	4.55336	NA	NA	NA	High	NA	High_NA
BRD:BRD-K30577245-001-04-3	ACH-000023	-0.127827	DOCETAXEL	2.5	PATU8988T_PANCREAS	Female	PANCREAS	Pancreas	Pancreatic Carcinoma	Pancreatic adenocarcinoma	2	Mutant	3.85052	6.59519	3.88391	5.18607	3.29311	3.16898	NA	High	Low	High_Low
BRD:BRD-K30577245-001-04-3	ACH-000026	-1.19927	DOCETAXEL	2.5	253JBV_URINARY_TRACT	Unknown	URINARY_TRACT	NA	NA	NA	0	WT	3.40249	5.64359	4.20639	3.9521	NA	NA	NA	High	NA	High_NA
BRD:BRD-K30577245-001-04-3	ACH-000027	-0.151149	DOCETAXEL	2.5	GOS3_CENTRAL_NERVOUS_SYSTEM	Unknown	CENTRAL_NERVOUS_SYSTEM	NA	NA	NA	0	WT	3.87993	6.02784	5.75305	4.37665	NA	NA	NA	High	NA	High_NA
BRD:BRD-K30577245-001-04-3	ACH-000030	-3.073	DOCETAXEL	2.5	PC14_LUNG	Male	LUNG	Lung	Non-Small Cell Lung Carcinoma	Lung Adenocarcinoma	2	Mutant	3.13069	6.74456	4.44525	4.04837	5.14414	4.33118	NA	Low	High	Low_High
BRD:BRD-K30577245-001-04-3	ACH-000035	-3.21933	DOCETAXEL	2.5	NCIH1650_LUNG	Male	LUNG	Lung	Non-Small Cell Lung Carcinoma	Lung Adenocarcinoma	0	WT	3.44476	3.61351	5.08649	4.46184	NA	3.75313	NA	Low	Low	Low_Low
BRD:BRD-K30577245-001-04-3	ACH-000037	-4.73476	DOCETAXEL	2.5	S117_THYROID	Unknown	THYROID	NA	NA	NA	2	Mutant	2.69983	2.19376	4.37563	3.13441	NA	NA	NA	Low	NA	Low_NA
BRD:BRD-K30577245-001-04-3	ACH-000040	-1.02526	DOCETAXEL	2.5	U118MG_CENTRAL_NERVOUS_SYSTEM	Male	CENTRAL_NERVOUS_SYSTEM	Central Nervous System	Glioma	Low Grade Glioma	2	Mutant	3.57633	4.97367	5.85276	4.59319	3.02349	4.65349	NA	High	High	High_High
BRD:BRD-K30577245-001-04-3	ACH-000041	-0.463555	DOCETAXEL	2.5	RDES_BONE	Unknown	BONE	NA	NA	NA	2	Mutant	4.03665	6.64664	5.4161	4.49295	NA	NA	NA	High	NA	High_NA
BRD:BRD-K30577245-001-04-3	ACH-000042	-2.31835	DOCETAXEL	2.5	PANC0203_PANCREAS	Female	PANCREAS	Pancreas	Pancreatic Carcinoma	Pancreatic adenocarcinoma	2	Mutant	2.7452	4.4467	4.45126	3.45289	3.81536	4.04583	NA	Low	High	Low_High
BRD:BRD-K30577245-001-04-3	ACH-000046	-3.75885	DOCETAXEL	2.5	ACHN_KIDNEY	Male	KIDNEY	Kidney	Kidney Carcinoma	Papillary renal cell carcinoma	0	WT	3.16315	5.41794	4.85936	4.19638	NA	4.6473	NA	Low	High	Low_High
BRD:BRD-K30577245-001-04-3	ACH-000047	-2.34559	DOCETAXEL	2.5	GCIY_STOMACH	Female	STOMACH	Stomach	Gastric Carcinoma	Gastric adenocarcinoma	2	Mutant	NA	NA	NA	NA	NA	4.82782	NA	NA	High	NA_High
BRD:BRD-K30577245-001-04-3	ACH-000048	-1.08202	DOCETAXEL	2.5	TOV112D_OVARY	Female	OVARY	Ovary	Ovarian Carcinoma	Ovarian endometrioid adenocarcinoma	2	Mutant	3.90785	6.7739	5.0774	4.27599	3.64731	4.03285	NA	High	Low	High_Low
BRD:BRD-K30577245-001-04-3	ACH-000051	0.0624261	DOCETAXEL	2.5	TE617T_SOFT_TISSUE	Unknown	SOFT_TISSUE	NA	NA	NA	0	WT	3.7606	4.62619	5.57891	4.69369	NA	NA	NA	High	NA	High_NA
BRD:BRD-K30577245-001-04-3	ACH-000052	-2.73142	DOCETAXEL	2.5	A673_BONE	Female	BONE	Bone	Ewing's Sarcoma	NA	0	WT	3.98157	3.41135	4.99926	4.40187	NA	4.23095	NA	Low	High	Low_High
BRD:BRD-K30577245-001-04-3	ACH-000054	-4.4277	DOCETAXEL	2.5	HT1080_SOFT_TISSUE	Male	SOFT_TISSUE	Soft Tissue	Other Sarcomas	Fibrosarcoma	0	WT	3.24636	5.21802	3.93958	3.83853	NA	3.89103	NA	Low	Low	Low_Low
BRD:BRD-K30577245-001-04-3	ACH-000060	-2.07179	DOCETAXEL	2.5	PANC1005_PANCREAS	Male	PANCREAS	Pancreas	Pancreatic Carcinoma	Pancreatic ductal adenocarcinoma	2	Mutant	3.70453	4.67449	4.36106	3.48707	NA	3.24938	NA	High	Low	High_Low
BRD:BRD-K30577245-001-04-3	ACH-000062	-2.91395	DOCETAXEL	2.5	RERFLCMS_LUNG	Male	LUNG	Lung	Non-Small Cell Lung Carcinoma	Lung Adenocarcinoma	0	WT	3.28205	2.43045	4.78038	4.10322	NA	4.3109	NA	Low	High	Low_High
BRD:BRD-K30577245-001-04-3	ACH-000066	-1.30688	DOCETAXEL	2.5	HCC4006_LUNG	Unknown	LUNG	NA	NA	NA	2	Mutant	3.7077	6.44023	4.43679	4.17883	NA	NA	NA	High	NA	High_NA
BRD:BRD-K30577245-001-04-3	ACH-000075	-1.71711	DOCETAXEL	2.5	U87MG_CENTRAL_NERVOUS_SYSTEM	Unknown	CENTRAL_NERVOUS_SYSTEM	NA	NA	NA	0	WT	3.10387	3.9106	4.94268	1.5381	NA	NA	NA	Low	NA	Low_NA
BRD:BRD-K30577245-001-04-3	ACH-000078	-1.09195	DOCETAXEL	2.5	MHHNB11_AUTONOMIC_GANGLIA	Male	AUTONOMIC_GANGLIA	Peripheral Nervous System	Neuroblastoma	NA	0	WT	4.30676	5.02547	5.66364	3.8265	NA	4.95444	NA	High	High	High_High
BRD:BRD-K30577245-001-04-3	ACH-000082	-0.0467635	DOCETAXEL	2.5	G292CLONEA141B1_BONE	Female	BONE	Bone	Osteosarcoma	NA	0	WT	2.84148	2.51512	5.27354	4.64098	NA	4.58237	NA	Low	High	Low_High
BRD:BRD-K30577245-001-04-3	ACH-000085	-0.724589	DOCETAXEL	2.5	NA	Unknown	NA	NA	NA	NA	2	Mutant	2.54541	5.23467	4.62394	4.38369	NA	NA	NA	Low	NA	Low_NA
BRD:BRD-K30577245-001-04-3	ACH-000086	0.710071	DOCETAXEL	2.5	ACCMESO1_PLEURA	Unknown	PLEURA	NA	NA	NA	0	WT	2.73909	1.77681	3.3926	3.37952	NA	NA	NA	Low	NA	Low_NA
BRD:BRD-K30577245-001-04-3	ACH-000087	-2.20472	DOCETAXEL	2.5	SKES1_BONE	Male	BONE	Bone	Ewing's Sarcoma	NA	2	Mutant	4.07993	6.92512	5.49217	4.08884	4.46983	4.81089	0.00377	High	High	High_High
BRD:BRD-K30577245-001-04-3	ACH-000090	-2.32187	DOCETAXEL	2.5	PC3_PROSTATE	Male	PROSTATE	Prostate	Prostate Carcinoma	NA	0	WT	2.76937	1.57116	4.10584	3.43746	NA	4.10717	NA	Low	High	Low_High
BRD:BRD-K30577245-001-04-3	ACH-000091	-2.46477	DOCETAXEL	2.5	OV56_OVARY	Female	OVARY	Ovary	Ovarian Carcinoma	Ovarian serous adenocarcinoma	0	WT	3.33196	2.57506	4.9366	3.90116	NA	4.00673	NA	High	Low	High_Low
BRD:BRD-K30577245-001-04-3	ACH-000092	-2.00361	DOCETAXEL	2.5	NCIH2452_PLEURA	Male	PLEURA	Lung	Mesothelioma	Pleural Biphasic Mesothelioma	0	WT	3.09909	5.10101	5.39148	3.88088	NA	4.67738	NA	Low	High	Low_High
BRD:BRD-K30577245-001-04-3	ACH-000096	-1.89013	DOCETAXEL	2.5	G401_SOFT_TISSUE	Male	SOFT_TISSUE	Other tissue	Other Solid Carcinomas	Rhabdoid Tumour of the Kidney	0	WT	4.37208	5.79132	5.06865	4.84659	NA	4.48878	NA	High	High	High_High
BRD:BRD-K30577245-001-04-3	ACH-000097	-1.34455	DOCETAXEL	2.5	ZR751_BREAST	Female	BREAST	NA	NA	NA	0	WT	3.9964	4.1056	4.18509	3.77431	NA	NA	NA	High	NA	High_NA
BRD:BRD-K30577245-001-04-3	ACH-000098	-2.47895	DOCETAXEL	2.5	GAMG_CENTRAL_NERVOUS_SYSTEM	Female	CENTRAL_NERVOUS_SYSTEM	Central Nervous System	Glioblastoma	NA	2	Mutant	3.09269	5.03518	5.42873	4.41708	NA	3.56964	0.69865	Low	Low	Low_Low
BRD:BRD-K30577245-001-04-3	ACH-000099	1.40017	DOCETAXEL	2.5	SIMA_AUTONOMIC_GANGLIA	Male	AUTONOMIC_GANGLIA	Peripheral Nervous System	Neuroblastoma	NA	0	WT	3.72659	4.98872	4.65414	3.23625	NA	4.63977	NA	Low	Low	Low_Low
BRD:BRD-K30577245-001-04-3	ACH-000102	-0.612804	DOCETAXEL	2.5	NA	Unknown	NA	NA	NA	NA	2	Mutant	3.56008	6.4366	5.57491	3.94559	NA	NA	NA	High	NA	High_NA
BRD:BRD-K30577245-001-04-3	ACH-000107	-1.69243	DOCETAXEL	2.5	CAPAN2_PANCREAS	Male	PANCREAS	Pancreas	Pancreatic Carcinoma	Pancreatic ductal adenocarcinoma	2	Mutant	3.418	5.08578	4.15549	4.24479	NA	3.6229	NA	High	Low	High_Low
BRD:BRD-K30577245-001-04-3	ACH-000108	-1.49608	DOCETAXEL	2.5	KP3_PANCREAS	Male	PANCREAS	Pancreas	Pancreatic Carcinoma	Pancreatic adenosquamous carcinoma	0	WT	4.29547	3.53802	4.25495	4.23785	NA	4.37908	NA	High	High	High_High
BRD:BRD-K30577245-001-04-3	ACH-000114	-0.413767	DOCETAXEL	2.5	NA	Female	NA	Pancreas	Pancreatic Carcinoma	Pancreatic adenocarcinoma	2	Mutant	3.26788	5.34958	4.36805	4.15376	NA	3.50141	NA	Low	Low	Low_Low
BRD:BRD-K30577245-001-04-3	ACH-000116	-1.27891	DOCETAXEL	2.5	NA	Female	NA	Ovary	Ovarian Carcinoma	High grade ovarian serous adenocarcinoma	0	WT	4.18821	1.82969	4.2753	4.79889	NA	3.8228	NA	High	Low	High_Low
BRD:BRD-K30577245-001-04-3	ACH-000117	-0.518759	DOCETAXEL	2.5	EFM192A_BREAST	Female	BREAST	Breast	Breast Carcinoma	NA	0	WT	3.51743	2.76385	4.17072	2.86583	NA	3.97948	NA	High	High	High_High
BRD:BRD-K30577245-001-04-3	ACH-000118	-2.32688	DOCETAXEL	2.5	HUPT3_PANCREAS	Male	PANCREAS	Pancreas	Pancreatic Carcinoma	Pancreatic adenocarcinoma	2	Mutant	2.79118	4.17656	4.46499	2.53861	NA	3.32092	NA	Low	Low	Low_Low
BRD:BRD-K30577245-001-04-3	ACH-000120	0.230668	DOCETAXEL	2.5	CHP212_AUTONOMIC_GANGLIA	Male	AUTONOMIC_GANGLIA	Peripheral Nervous System	Neuroblastoma	NA	0	WT	3.6374	6.40563	5.16073	4.41777	NA	4.83829	NA	Low	Low	Low_Low
BRD:BRD-K30577245-001-04-3	ACH-000123	-1.95614	DOCETAXEL	2.5	COV434_OVARY	Female	OVARY	NA	NA	NA	0	WT	3.61508	4.75611	4.12232	4.15783	NA	NA	NA	High	NA	High_NA
BRD:BRD-K30577245-001-04-3	ACH-000132	-1.09202	DOCETAXEL	2.5	JHOS2_OVARY	Female	OVARY	Ovary	Ovarian Carcinoma	High grade ovarian serous adenocarcinoma	0	WT	3.67567	6.30249	2.82904	4.08288	NA	2.9704	NA	High	Low	High_Low
BRD:BRD-K30577245-001-04-3	ACH-000133	-2.34402	DOCETAXEL	2.5	HS729_SOFT_TISSUE	Unknown	SOFT_TISSUE	NA	NA	NA	2	Mutant	2.79118	6.39499	4.83302	3.96228	NA	NA	NA	Low	NA	Low_NA
BRD:BRD-K30577245-001-04-3	ACH-000137	-1.07413	DOCETAXEL	2.5	8MGBA_CENTRAL_NERVOUS_SYSTEM	Female	CENTRAL_NERVOUS_SYSTEM	Central Nervous System	Glioblastoma	NA	2	Mutant	4.075	6.37167	4.94528	3.31793	3.2683	3.90342	NA	High	Low	High_Low
BRD:BRD-K30577245-001-04-3	ACH-000138	-2.94896	DOCETAXEL	2.5	CFPAC1_PANCREAS	Male	PANCREAS	Pancreas	Pancreatic Carcinoma	Pancreatic ductal adenocarcinoma	2	Mutant	3.11497	3.99377	4.54655	2.92446	NA	5.08581	NA	Low	High	Low_High
BRD:BRD-K30577245-001-04-3	ACH-000139	2.03794	DOCETAXEL	2.5	PANC0327_PANCREAS	Female	PANCREAS	Pancreas	Pancreatic Carcinoma	Pancreatic adenocarcinoma	0	WT	2.59571	4.28544	3.25634	3.59469	NA	3.30836	NA	Low	Low	Low_Low
BRD:BRD-K30577245-001-04-3	ACH-000141	-1.54347	DOCETAXEL	2.5	SNU308_BILIARY_TRACT	Unknown	BILIARY_TRACT	NA	NA	NA	0	WT	3.57864	5.16772	5.00219	3.93249	NA	NA	NA	High	NA	High_NA
BRD:BRD-K30577245-001-04-3	ACH-000142	-2.55477	DOCETAXEL	2.5	CAL29_URINARY_TRACT	Female	URINARY_TRACT	Bladder	Bladder Carcinoma	NA	2	Mutant	3.36565	4.96816	4.95906	3.48832	NA	4.33013	NA	High	High	High_High
BRD:BRD-K30577245-001-04-3	ACH-000147	-1.48328	DOCETAXEL	2.5	T47D_BREAST	Female	BREAST	Breast	Breast Carcinoma	Invasive Ductal Carcinoma of No Special Type	2	Mutant	3.13537	5.52392	4.87938	4.52023	3.62894	3.82558	NA	Low	Low	Low_Low
BRD:BRD-K30577245-001-04-3	ACH-000149	0.457759	DOCETAXEL	2.5	SKNSH_AUTONOMIC_GANGLIA	Female	AUTONOMIC_GANGLIA	Peripheral Nervous System	Neuroblastoma	NA	0	WT	3.78786	5.90501	5.01133	4.54578	NA	4.88008	NA	Low	High	Low_High
BRD:BRD-K30577245-001-04-3	ACH-000153	-1.62444	DOCETAXEL	2.5	NCIH2052_PLEURA	Male	PLEURA	Lung	Mesothelioma	Pleural Sarcomatoid Mesothelioma	0	WT	3.73076	5.03869	3.76793	4.81015	NA	2.75167	NA	High	Low	High_Low
BRD:BRD-K30577245-001-04-3	ACH-000155	-0.695796	DOCETAXEL	2.5	SW1990_PANCREAS	Male	PANCREAS	Pancreas	Pancreatic Carcinoma	Pancreatic adenocarcinoma	0	WT	2.48366	5.33596	2.88574	3.7691	3.58753	3.05674	NA	Low	Low	Low_Low
BRD:BRD-K30577245-001-04-3	ACH-000159	-1.73988	DOCETAXEL	2.5	OSRC2_KIDNEY	Male	KIDNEY	Kidney	Kidney Carcinoma	NA	0	WT	2.90295	4.92524	4.82132	4.13984	NA	3.94947	NA	Low	Low	Low_Low
BRD:BRD-K30577245-001-04-3	ACH-000161	-0.346166	DOCETAXEL	2.5	CORL105_LUNG	Male	LUNG	Lung	Non-Small Cell Lung Carcinoma	Lung Adenocarcinoma	0	WT	3.58439	4.41448	4.44826	2.33705	NA	3.7525	NA	High	Low	High_Low
BRD:BRD-K30577245-001-04-3	ACH-000163	-2.43606	DOCETAXEL	2.5	SW579_THYROID	Unknown	THYROID	NA	NA	NA	2	Mutant	3.12599	6.06776	5.19671	4.0769	NA	NA	NA	High	NA	High_NA
BRD:BRD-K30577245-001-04-3	ACH-000164	-0.897492	DOCETAXEL	2.5	PANC1_PANCREAS	Unknown	PANCREAS	NA	NA	NA	2	Mutant	3.07494	5.00676	5.3589	4.68271	NA	NA	NA	Low	NA	Low_NA
BRD:BRD-K30577245-001-04-3	ACH-000169	-1.28692	DOCETAXEL	2.5	RD_SOFT_TISSUE	Female	SOFT_TISSUE	Soft Tissue	Rhabdomyosarcoma	Embryonal rhabdomyosarcoma	2	Mutant	3.63074	5.65149	5.57377	5.07209	4.22686	4.58741	NA	High	High	High_High
BRD:BRD-K30577245-001-04-3	ACH-000171	-2.76368	DOCETAXEL	2.5	VMRCRCZ_KIDNEY	Unknown	KIDNEY	Kidney	Kidney Carcinoma	NA	0	WT	4.77189	2.73162	5.0051	4.44774	NA	3.90681	NA	High	Low	High_Low
BRD:BRD-K30577245-001-04-3	ACH-000172	-2.99934	DOCETAXEL	2.5	TM87_SOFT_TISSUE	Unknown	SOFT_TISSUE	NA	NA	NA	0	WT	3.83607	5.59831	6.34359	4.57402	NA	NA	NA	High	NA	High_NA
BRD:BRD-K30577245-001-04-3	ACH-000174	-3.90036	DOCETAXEL	2.5	CAL62_THYROID	Female	THYROID	Thyroid	Thyroid Gland Carcinoma	Thyroid gland anaplastic carcinoma	2	Mutant	3.54718	5.832	4.69604	4.3088	NA	4.10617	NA	High	Low	High_Low
BRD:BRD-K30577245-001-04-3	ACH-000176	-1.35109	DOCETAXEL	2.5	LOUNH91_LUNG	Female	LUNG	Lung	Non-Small Cell Lung Carcinoma	Squamous Cell Lung Carcinoma	2	Mutant	3.01193	5.5825	4.72984	4.59073	NA	4.07443	NA	Low	High	Low_High
BRD:BRD-K30577245-001-04-3	ACH-000178	-0.223184	DOCETAXEL	2.5	HS766T_PANCREAS	Male	PANCREAS	Pancreas	Pancreatic Carcinoma	Pancreatic adenocarcinoma	0	WT	3.48093	7.01425	4.06923	4.39839	NA	2.72638	NA	High	Low	High_Low
BRD:BRD-K30577245-001-04-3	ACH-000182	-2.08745	DOCETAXEL	2.5	SNU869_BILIARY_TRACT	Unknown	BILIARY_TRACT	NA	NA	NA	0	WT	4.36264	4.22258	4.49033	3.82952	NA	NA	NA	High	NA	High_NA
BRD:BRD-K30577245-001-04-3	ACH-000186	-2.08554	DOCETAXEL	2.5	NCIH2444_LUNG	Male	LUNG	Lung	Non-Small Cell Lung Carcinoma	NA	2	Mutant	2.55237	5.30907	3.6586	3.53757	2.96028	4.63375	NA	Low	High	Low_High
BRD:BRD-K30577245-001-04-3	ACH-000188	-2.9177	DOCETAXEL	2.5	SCC25_UPPER_AERODIGESTIVE_TRACT	Male	UPPER_AERODIGESTIVE_TRACT	Head and Neck	Head and Neck Carcinoma	Tongue Squamous Cell Carcinoma	0	WT	1.84739	1.85909	2.76284	3.35381	NA	3.59427	NA	Low	Low	Low_Low
BRD:BRD-K30577245-001-04-3	ACH-000189	-3.58157	DOCETAXEL	2.5	RCC10RGB_KIDNEY	Male	KIDNEY	Kidney	Kidney Carcinoma	NA	0	WT	2.64435	5.59619	4.93834	2.86396	NA	3.70769	NA	Low	Low	Low_Low
BRD:BRD-K30577245-001-04-3	ACH-000191	-3.48128	DOCETAXEL	2.5	BHT101_THYROID	Female	THYROID	Thyroid	Thyroid Gland Carcinoma	Thyroid gland anaplastic carcinoma	2	Mutant	3.0668	5.55131	4.01981	3.05546	2.45814	3.63103	NA	Low	Low	Low_Low
BRD:BRD-K30577245-001-04-3	ACH-000192	-1.85554	DOCETAXEL	2.5	MFE280_ENDOMETRIUM	Female	ENDOMETRIUM	Endometrium	Endometrial Carcinoma	Endometrial adenocarcinoma	0	WT	3.39206	4.40246	5.17939	4.42531	NA	4.57703	NA	Low	Low	Low_Low
BRD:BRD-K30577245-001-04-3	ACH-000200	-1.59884	DOCETAXEL	2.5	NA	Female	NA	Central Nervous System	Glioma	Low Grade Glioma	0	WT	3.14623	4.91384	4.53297	3.90594	NA	4.36371	NA	Low	High	Low_High
BRD:BRD-K30577245-001-04-3	ACH-000201	-1.21878	DOCETAXEL	2.5	A204_SOFT_TISSUE	Female	SOFT_TISSUE	Soft Tissue	Rhabdomyosarcoma	Embryonal rhabdomyosarcoma	0	WT	2.45674	5.74074	4.79383	4.08544	NA	5.28539	NA	Low	High	Low_High
BRD:BRD-K30577245-001-04-3	ACH-000205	-1.63922	DOCETAXEL	2.5	PK59_PANCREAS	Unknown	PANCREAS	NA	NA	NA	0	WT	3.11023	3.57914	3.96955	3.26829	NA	NA	NA	Low	NA	Low_NA
BRD:BRD-K30577245-001-04-3	ACH-000207	-4.12219	DOCETAXEL	2.5	DETROIT562_UPPER_AERODIGESTIVE_TRACT	Female	UPPER_AERODIGESTIVE_TRACT	Head and Neck	Head and Neck Carcinoma	Pharyngeal squamous cell carcinoma	2	Mutant	2.06899	6.1619	3.85129	2.83946	3.63874	4.00417	NA	Low	High	Low_High
BRD:BRD-K30577245-001-04-3	ACH-000209	-1.31051	DOCETAXEL	2.5	SNU1079_BILIARY_TRACT	Unknown	BILIARY_TRACT	NA	NA	NA	0	WT	2.57078	5.58555	3.84861	3.01697	NA	NA	NA	Low	NA	Low_NA
BRD:BRD-K30577245-001-04-3	ACH-000210	-2.62742	DOCETAXEL	2.5	CADOES1_BONE	Female	BONE	Bone	Ewing's Sarcoma	NA	0	WT	3.13069	5.16207	4.53864	3.74913	NA	3.44107	NA	Low	Low	Low_Low
BRD:BRD-K30577245-001-04-3	ACH-000211	-5.1944	DOCETAXEL	2.5	DAOY_CENTRAL_NERVOUS_SYSTEM	Male	CENTRAL_NERVOUS_SYSTEM	Central Nervous System	Other Solid Carcinomas	Medulloblastoma	2	Mutant	3.58439	7.60068	5.16523	4.29695	3.95349	4.05886	NA	High	Low	High_Low
BRD:BRD-K30577245-001-04-3	ACH-000212	1.18453	DOCETAXEL	2.5	CAL120_BREAST	Female	BREAST	Breast	Breast Carcinoma	NA	0	WT	3.55891	3.83041	3.66466	4.74189	NA	3.42062	1.0141	High	Low	High_Low
BRD:BRD-K30577245-001-04-3	ACH-000213	-2.24196	DOCETAXEL	2.5	HUPT4_PANCREAS	Male	PANCREAS	Pancreas	Pancreatic Carcinoma	Pancreatic adenocarcinoma	2	Mutant	3.46358	5.11818	3.71132	3.55685	2.25856	3.05173	NA	High	Low	High_Low
BRD:BRD-K30577245-001-04-3	ACH-000217	0.0865903	DOCETAXEL	2.5	JHH6_LIVER	Female	LIVER	Liver	Hepatocellular Carcinoma	NA	0	WT	3.27214	4.75558	4.06305	4.92793	NA	4.60451	NA	Low	High	Low_High
BRD:BRD-K30577245-001-04-3	ACH-000219	-1.18465	DOCETAXEL	2.5	A375_SKIN	Female	SKIN	Skin	Melanoma	Cutaneous melanoma	0	WT	3.73491	5.30797	4.23502	4.15132	NA	3.6692	NA	High	Low	High_Low
BRD:BRD-K30577245-001-04-3	ACH-000221	-0.143788	DOCETAXEL	2.5	SNU398_LIVER	Male	LIVER	Liver	Hepatocellular Carcinoma	NA	2	Mutant	4.11718	3.46356	4.58437	4.19876	NA	4.28751	NA	High	High	High_High
BRD:BRD-K30577245-001-04-3	ACH-000222	-1.82812	DOCETAXEL	2.5	ASPC1_PANCREAS	Female	PANCREAS	Pancreas	Pancreatic Carcinoma	Pancreatic ductal adenocarcinoma	0	WT	4.06923	2.45513	3.78944	3.77119	NA	2.8808	NA	High	Low	High_Low
BRD:BRD-K30577245-001-04-3	ACH-000223	-1.67738	DOCETAXEL	2.5	HCC1937_BREAST	Female	BREAST	Breast	Breast Carcinoma	Ductal Breast Carcinoma	2	Mutant	3.35361	4.15222	4.1156	4.81069	NA	3.83084	NA	Low	Low	Low_Low
BRD:BRD-K30577245-001-04-3	ACH-000227	0.0519323	DOCETAXEL	2.5	KPNYN_AUTONOMIC_GANGLIA	Male	AUTONOMIC_GANGLIA	Peripheral Nervous System	Neuroblastoma	NA	0	WT	3.69391	5.84796	4.7634	3.68324	NA	4.3914	NA	Low	Low	Low_Low
BRD:BRD-K30577245-001-04-3	ACH-000228	-3.27052	DOCETAXEL	2.5	BICR31_UPPER_AERODIGESTIVE_TRACT	Male	UPPER_AERODIGESTIVE_TRACT	Head and Neck	Head and Neck Carcinoma	Tongue Squamous Cell Carcinoma	0	WT	2.17741	5.95449	3.77825	2.98962	NA	3.15448	NA	Low	Low	Low_Low
BRD:BRD-K30577245-001-04-3	ACH-000231	-2.00417	DOCETAXEL	2.5	KALS1_CENTRAL_NERVOUS_SYSTEM	Female	CENTRAL_NERVOUS_SYSTEM	Central Nervous System	Glioblastoma	NA	2	Mutant	2.98974	6.2168	4.80859	4.00233	3.62013	4.3294	NA	Low	High	Low_High
BRD:BRD-K30577245-001-04-3	ACH-000232	-1.8234	DOCETAXEL	2.5	U251MG_CENTRAL_NERVOUS_SYSTEM	Male	CENTRAL_NERVOUS_SYSTEM	Central Nervous System	Glioma	Low Grade Glioma	2	Mutant	3.33604	6.26841	5.36776	4.41501	3.29077	5.0567	NA	Low	High	Low_High
BRD:BRD-K30577245-001-04-3	ACH-000234	-3.70612	DOCETAXEL	2.5	NA	Unknown	NA	NA	NA	NA	0	WT	3.3855	5.22501	4.71177	3.66213	NA	NA	NA	High	NA	High_NA
BRD:BRD-K30577245-001-04-3	ACH-000235	-2.65813	DOCETAXEL	2.5	PANC0403_PANCREAS	Male	PANCREAS	Pancreas	Pancreatic Carcinoma	Pancreatic ductal adenocarcinoma	2	Mutant	3.05533	4.90859	4.23294	3.57588	NA	3.72031	NA	Low	High	Low_High
BRD:BRD-K30577245-001-04-3	ACH-000242	-1.01496	DOCETAXEL	2.5	RT4_URINARY_TRACT	Male	URINARY_TRACT	Bladder	Bladder Carcinoma	NA	0	WT	3.9657	5.3065	4.55049	4.04837	NA	3.99636	NA	High	Low	High_Low
BRD:BRD-K30577245-001-04-3	ACH-000243	-4.28593	DOCETAXEL	2.5	DANG_PANCREAS	Female	PANCREAS	Pancreas	Pancreatic Carcinoma	Pancreatic adenocarcinoma	0	WT	2.99146	3.26446	4.3412	5.16326	NA	2.91622	0.8478	Low	Low	Low_Low
BRD:BRD-K30577245-001-04-3	ACH-000244	-1.18693	DOCETAXEL	2.5	DKMG_CENTRAL_NERVOUS_SYSTEM	Female	CENTRAL_NERVOUS_SYSTEM	Central Nervous System	Glioblastoma	NA	0	WT	3.25644	5.21021	5.35296	3.47954	NA	4.82401	NA	Low	High	Low_High
BRD:BRD-K30577245-001-04-3	ACH-000249	-1.01527	DOCETAXEL	2.5	CL11_LARGE_INTESTINE	Male	LARGE_INTESTINE	Large Intestine	Colorectal Carcinoma	Colon adenocarcinoma	2	Mutant	3.2693	4.09166	4.64414	3.8042	NA	4.7061	NA	Low	High	Low_High
BRD:BRD-K30577245-001-04-3	ACH-000250	-2.27861	DOCETAXEL	2.5	KMRC20_KIDNEY	Unknown	KIDNEY	Kidney	Kidney Carcinoma	Clear cell renal cell carcinoma	0	WT	3.42057	2.39009	5.05824	4.41156	NA	4.5255	NA	Low	High	Low_High
BRD:BRD-K30577245-001-04-3	ACH-000252	-2.29645	DOCETAXEL	2.5	LS1034_LARGE_INTESTINE	Male	LARGE_INTESTINE	Large Intestine	Colorectal Carcinoma	Cecum adenocarcinoma	2	Mutant	3.30721	6.27806	4.63301	3.50821	NA	4.07431	NA	Low	High	Low_High
BRD:BRD-K30577245-001-04-3	ACH-000256	-1.63328	DOCETAXEL	2.5	COV318_OVARY	Female	OVARY	NA	NA	NA	2	Mutant	3.3086	4.63885	3.87692	4.30437	NA	NA	NA	High	NA	High_NA
BRD:BRD-K30577245-001-04-3	ACH-000259	-3.18717	DOCETAXEL	2.5	KELLY_AUTONOMIC_GANGLIA	Female	AUTONOMIC_GANGLIA	Peripheral Nervous System	Neuroblastoma	NA	0	WT	3.7555	4.93138	5.21384	4.41777	NA	5.01452	NA	Low	High	Low_High
BRD:BRD-K30577245-001-04-3	ACH-000260	-1.26743	DOCETAXEL	2.5	SKNAS_AUTONOMIC_GANGLIA	Female	AUTONOMIC_GANGLIA	Peripheral Nervous System	Neuroblastoma	NA	0	WT	3.57979	4.29195	5.45801	2.95826	NA	4.45208	NA	Low	Low	Low_Low
BRD:BRD-K30577245-001-04-3	ACH-000261	-1.83282	DOCETAXEL	2.5	RERFLCAI_LUNG	Unknown	LUNG	NA	NA	NA	2	Mutant	3.7606	3.59299	4.5187	4.96173	NA	NA	NA	High	NA	High_NA
BRD:BRD-K30577245-001-04-3	ACH-000264	-6.2171	DOCETAXEL	2.5	CALU6_LUNG	Female	LUNG	Lung	Non-Small Cell Lung Carcinoma	Lung adenocarcinoma	2	Mutant	3.80378	3.47229	5.49578	3.33598	NA	5.27637	NA	High	High	High_High
BRD:BRD-K30577245-001-04-3	ACH-000265	-1.72691	DOCETAXEL	2.5	KP4_PANCREAS	Male	PANCREAS	Pancreas	Pancreatic Carcinoma	NA	0	WT	3.55188	1.37861	5.09475	4.51572	NA	4.26291	NA	High	High	High_High
BRD:BRD-K30577245-001-04-3	ACH-000266	-1.13765	DOCETAXEL	2.5	SNU213_PANCREAS	Unknown	PANCREAS	NA	NA	NA	2	Mutant	2.70819	5.57944	3.7651	3.4745	NA	NA	NA	Low	NA	Low_NA
BRD:BRD-K30577245-001-04-3	ACH-000268	-1.28127	DOCETAXEL	2.5	SNU245_BILIARY_TRACT	Unknown	BILIARY_TRACT	NA	NA	NA	2	Mutant	4.04675	6.03803	3.89435	3.23478	NA	NA	NA	High	NA	High_NA
BRD:BRD-K30577245-001-04-3	ACH-000269	-0.864293	DOCETAXEL	2.5	AM38_CENTRAL_NERVOUS_SYSTEM	Male	CENTRAL_NERVOUS_SYSTEM	Central Nervous System	Glioblastoma	NA	0	WT	3.30583	4.1936	3.81156	4.41845	1.04703	3.23957	NA	Low	Low	Low_Low
BRD:BRD-K30577245-001-04-3	ACH-000270	-0.274395	DOCETAXEL	2.5	HPAC_PANCREAS	Female	PANCREAS	Pancreas	Pancreatic Carcinoma	Pancreatic adenocarcinoma	0	WT	3.52223	3.4982	3.96955	4.09816	NA	4.71169	NA	High	High	High_High
BRD:BRD-K30577245-001-04-3	ACH-000273	-2.52401	DOCETAXEL	2.5	SF539_CENTRAL_NERVOUS_SYSTEM	Female	CENTRAL_NERVOUS_SYSTEM	Central Nervous System	Glioblastoma	NA	0	WT	2.64652	4.02338	5.11384	4.0536	NA	2.89057	NA	Low	Low	Low_Low
BRD:BRD-K30577245-001-04-3	ACH-000274	-0.320731	DOCETAXEL	2.5	HS852T_SKIN	Unknown	SKIN	NA	NA	NA	0	WT	3.01193	4.44475	4.50603	3.29827	NA	NA	NA	Low	NA	Low_NA
BRD:BRD-K30577245-001-04-3	ACH-000276	-0.681099	DOCETAXEL	2.5	HCC38_BREAST	Female	BREAST	Breast	Breast Carcinoma	Ductal Breast Carcinoma	2	Mutant	3.37759	5.11484	5.33533	4.3315	3.1085	4.71238	NA	Low	High	Low_High
BRD:BRD-K30577245-001-04-3	ACH-000277	-0.385382	DOCETAXEL	2.5	HCC1419_BREAST	Female	BREAST	Breast	Breast Carcinoma	Ductal Breast Carcinoma	1	Mutant	4.07747	4.1419	3.98431	3.1202	NA	3.27915	NA	High	Low	High_Low
BRD:BRD-K30577245-001-04-3	ACH-000278	-1.99915	DOCETAXEL	2.5	COV362_OVARY	Female	OVARY	NA	NA	NA	2	Mutant	2.93007	5.92095	4.25427	2.48943	NA	NA	NA	Low	NA	Low_NA
BRD:BRD-K30577245-001-04-3	ACH-000279	-2.77711	DOCETAXEL	2.5	EWS502_BONE	Unknown	BONE	NA	NA	NA	2	Mutant	3.99206	6.72125	4.87304	4.58394	NA	NA	NA	High	NA	High_NA
BRD:BRD-K30577245-001-04-3	ACH-000280	-1.51255	DOCETAXEL	2.5	SNU840_OVARY	Female	OVARY	NA	NA	NA	0	WT	3.23038	4.01126	4.67911	4.03611	NA	NA	NA	Low	NA	Low_NA
BRD:BRD-K30577245-001-04-3	ACH-000281	-0.507096	DOCETAXEL	2.5	KP2_PANCREAS	Female	PANCREAS	Pancreas	Pancreatic Carcinoma	NA	2	Mutant	3.59583	5.23236	4.17145	5.12665	NA	3.80566	NA	High	High	High_High
BRD:BRD-K30577245-001-04-3	ACH-000288	-1.7734	DOCETAXEL	2.5	BT549_BREAST	Female	BREAST	Breast	Breast Carcinoma	Invasive Ductal Carcinoma of No Special Type	2	Mutant	2.97938	7.04794	4.53751	4.57153	4.05182	3.87587	NA	Low	Low	Low_Low
BRD:BRD-K30577245-001-04-3	ACH-000289	0.204283	DOCETAXEL	2.5	SNU466_CENTRAL_NERVOUS_SYSTEM	Unknown	CENTRAL_NERVOUS_SYSTEM	NA	NA	NA	0	WT	3.38287	5.30944	4.11934	2.7971	NA	NA	NA	High	NA	High_NA
BRD:BRD-K30577245-001-04-3	ACH-000291	0.264509	DOCETAXEL	2.5	NA	Female	NA	Ovary	Ovarian Carcinoma	Ovarian adenocarcinoma	2	Mutant	3.21718	4.91098	3.47708	3.81843	NA	3.03941	NA	Low	Low	Low_Low
BRD:BRD-K30577245-001-04-3	ACH-000292	-2.58996	DOCETAXEL	2.5	NCIH841_LUNG	Unknown	LUNG	NA	NA	NA	2	Mutant	3.56124	7.14276	5.47274	5.21352	NA	NA	NA	High	NA	High_NA
BRD:BRD-K30577245-001-04-3	ACH-000296	-1.5611	DOCETAXEL	2.5	OUMS23_LARGE_INTESTINE	Unknown	LARGE_INTESTINE	NA	NA	NA	2	Mutant	3.51262	6.01689	4.77458	5.33248	NA	NA	NA	Low	NA	Low_NA
BRD:BRD-K30577245-001-04-3	ACH-000302	-0.584808	DOCETAXEL	2.5	SNU1077_ENDOMETRIUM	Female	ENDOMETRIUM	NA	NA	NA	2	Mutant	3.08142	5.0518	4.05606	3.75967	NA	NA	NA	Low	NA	Low_NA
BRD:BRD-K30577245-001-04-3	ACH-000305	-2.84137	DOCETAXEL	2.5	ECGI10_OESOPHAGUS	Male	OESOPHAGUS	Esophagus	Esophageal Carcinoma	Esophageal Squamous Cell Carcinoma	2	Mutant	2.91205	6.45621	4.78038	3.22147	4.06244	3.84001	NA	Low	Low	Low_Low
BRD:BRD-K30577245-001-04-3	ACH-000307	-6.44889	DOCETAXEL	2.5	PK1_PANCREAS	Unknown	PANCREAS	NA	NA	NA	2	Mutant	3.05204	4.98599	5.1053	4.02729	NA	NA	NA	Low	NA	Low_NA
BRD:BRD-K30577245-001-04-3	ACH-000308	-4.3305	DOCETAXEL	2.5	EFO21_OVARY	Female	OVARY	Ovary	Ovarian Carcinoma	Ovarian Cystadenocarcinoma	0	WT	3.13848	7.03288	4.45485	5.56959	3.90798	4.42694	1.77425	Low	High	Low_High
BRD:BRD-K30577245-001-04-3	ACH-000309	-0.473763	DOCETAXEL	2.5	SKLU1_LUNG	Female	LUNG	Lung	Non-Small Cell Lung Carcinoma	Lung Adenocarcinoma	2	Mutant	NA	NA	NA	NA	NA	5.17448	NA	NA	High	NA_High
BRD:BRD-K30577245-001-04-3	ACH-000311	-2.95015	DOCETAXEL	2.5	NCIH2122_LUNG	Female	LUNG	Lung	Non-Small Cell Lung Carcinoma	Lung Adenocarcinoma	1	Mutant	3.32101	5.04962	3.41655	3.44648	-1.23094	3.66073	NA	Low	Low	Low_Low
BRD:BRD-K30577245-001-04-3	ACH-000312	-2.33615	DOCETAXEL	2.5	SKNBE2_AUTONOMIC_GANGLIA	Unknown	AUTONOMIC_GANGLIA	NA	NA	NA	2	Mutant	3.99727	6.07306	5.39663	3.8925	NA	NA	NA	High	NA	High_NA
BRD:BRD-K30577245-001-04-3	ACH-000313	-1.16381	DOCETAXEL	2.5	KMRC3_KIDNEY	Unknown	KIDNEY	NA	NA	NA	1	Mutant	3.71508	5.36485	5.38534	3.85442	NA	NA	NA	High	NA	High_NA
BRD:BRD-K30577245-001-04-3	ACH-000316	-5.73645	DOCETAXEL	2.5	SNU886_LIVER	Unknown	LIVER	NA	NA	NA	0	WT	3.51623	1.51731	5.11925	3.55085	NA	NA	NA	Low	NA	Low_NA
BRD:BRD-K30577245-001-04-3	ACH-000318	-3.01944	DOCETAXEL	2.5	TE10_OESOPHAGUS	Male	OESOPHAGUS	Esophagus	Esophageal Carcinoma	Esophageal Squamous Cell Carcinoma	2	Mutant	3.51382	4.83101	4.13863	2.83756	3.2845	4.38894	NA	High	High	High_High
BRD:BRD-K30577245-001-04-3	ACH-000319	-0.0724212	DOCETAXEL	2.5	MPP89_PLEURA	Male	PLEURA	Lung	Mesothelioma	Pleural Epithelioid Mesothelioma	0	WT	3.29608	1.98805	4.52214	2.90273	NA	4.00016	NA	High	Low	High_Low
BRD:BRD-K30577245-001-04-3	ACH-000322	-0.953838	DOCETAXEL	2.5	HT144_SKIN	Male	SKIN	Skin	Melanoma	NA	0	WT	3.37495	5.36025	4.30861	3.04384	NA	4.18221	NA	Low	High	Low_High
BRD:BRD-K30577245-001-04-3	ACH-000323	-0.658301	DOCETAXEL	2.5	42MGBA_CENTRAL_NERVOUS_SYSTEM	Male	CENTRAL_NERVOUS_SYSTEM	Central Nervous System	Glioblastoma	NA	2	Mutant	2.93722	4.95384	5.42211	4.17883	NA	3.92478	NA	Low	Low	Low_Low
BRD:BRD-K30577245-001-04-3	ACH-000324	-2.16563	DOCETAXEL	2.5	JHOC5_OVARY	Female	OVARY	NA	NA	NA	0	WT	2.3358	4.96079	4.08077	4.14477	NA	NA	NA	Low	NA	Low_NA
BRD:BRD-K30577245-001-04-3	ACH-000329	-1.78985	DOCETAXEL	2.5	CCFSTTG1_CENTRAL_NERVOUS_SYSTEM	Unknown	CENTRAL_NERVOUS_SYSTEM	NA	NA	NA	0	WT	3.20237	4.48144	4.77361	4.15539	NA	NA	NA	Low	NA	Low_NA
BRD:BRD-K30577245-001-04-3	ACH-000330	-0.962853	DOCETAXEL	2.5	EFM19_BREAST	Female	BREAST	Breast	Breast Carcinoma	Ductal Breast Carcinoma	2	Mutant	4.30465	5.10059	4.41238	3.53636	NA	4.34296	NA	High	High	High_High
BRD:BRD-K30577245-001-04-3	ACH-000331	0.368122	DOCETAXEL	2.5	ISTMES2_PLEURA	Unknown	PLEURA	NA	NA	NA	2	Mutant	3.15548	5.18055	4.95949	3.46183	NA	NA	NA	Low	NA	Low_NA
BRD:BRD-K30577245-001-04-3	ACH-000332	-0.38778	DOCETAXEL	2.5	YAPC_PANCREAS	Male	PANCREAS	Pancreas	Pancreatic Carcinoma	NA	2	Mutant	3.8921	5.93068	4.48447	5.61608	2.16123	4.36624	1.49758	High	High	High_High
BRD:BRD-K30577245-001-04-3	ACH-000343	-1.31191	DOCETAXEL	2.5	NCIH522_LUNG	Male	LUNG	Lung	Non-Small Cell Lung Carcinoma	Lung Adenocarcinoma	0	WT	4.63219	1.77681	5.17493	4.70517	NA	3.85626	NA	High	Low	High_Low
BRD:BRD-K30577245-001-04-3	ACH-000344	1.00589	DOCETAXEL	2.5	SNU668_STOMACH	Unknown	STOMACH	NA	NA	NA	2	Mutant	3.80575	4.52715	3.99246	3.61557	NA	NA	NA	High	NA	High_NA
BRD:BRD-K30577245-001-04-3	ACH-000347	0.276476	DOCETAXEL	2.5	QGP1_PANCREAS	Male	PANCREAS	Pancreas	Other Solid Carcinomas	Pancreatic somatostatinoma	0	WT	4.18821	3.63376	5.83771	4.02552	NA	5.81586	NA	High	High	High_High
BRD:BRD-K30577245-001-04-3	ACH-000348	-1.97059	DOCETAXEL	2.5	RPMI7951_SKIN	Female	SKIN	Skin	Melanoma	NA	0	WT	3.83413	3.39179	5.17158	4.11747	NA	3.964	NA	High	High	High_High
BRD:BRD-K30577245-001-04-3	ACH-000350	-0.976034	DOCETAXEL	2.5	COLO678_LARGE_INTESTINE	Male	LARGE_INTESTINE	Large Intestine	Colorectal Carcinoma	NA	0	WT	3.1979	5.65674	4.99173	3.2274	NA	4.43883	NA	Low	High	Low_High
BRD:BRD-K30577245-001-04-3	ACH-000351	-1.50108	DOCETAXEL	2.5	MKN1_STOMACH	Unknown	STOMACH	NA	NA	NA	2	Mutant	3.67567	6.23888	4.04669	4.32202	NA	NA	NA	Low	NA	Low_NA
BRD:BRD-K30577245-001-04-3	ACH-000352	-0.0959797	DOCETAXEL	2.5	HCC1428_BREAST	Female	BREAST	Breast	Breast Carcinoma	Breast adenocarcinoma	0	WT	3.93344	6.3973	3.9513	4.21921	NA	3.48564	NA	High	Low	High_Low
BRD:BRD-K30577245-001-04-3	ACH-000356	-2.42585	DOCETAXEL	2.5	MKN45_STOMACH	Female	STOMACH	Stomach	Gastric Carcinoma	Gastric adenocarcinoma	1	Mutant	4.28051	5.45765	3.9679	4.08544	NA	3.31351	NA	High	Low	High_Low
BRD:BRD-K30577245-001-04-3	ACH-000359	0.0811603	DOCETAXEL	2.5	MG63_BONE	Male	BONE	Bone	Osteosarcoma	NA	0	WT	2.25873	2.22547	4.82085	3.84052	NA	4.12352	NA	Low	High	Low_High
BRD:BRD-K30577245-001-04-3	ACH-000361	-2.75373	DOCETAXEL	2.5	SKHEP1_LIVER	Male	LIVER	Liver	Hepatocellular Carcinoma	NA	0	WT	3.04377	5.63977	4.40188	3.76492	NA	4.57757	NA	Low	High	Low_High
BRD:BRD-K30577245-001-04-3	ACH-000364	-2.61302	DOCETAXEL	2.5	U2OS_BONE	Female	BONE	Bone	Osteosarcoma	NA	0	WT	3.93163	4.75982	4.99299	4.9525	NA	3.96255	NA	Low	Low	Low_Low
BRD:BRD-K30577245-001-04-3	ACH-000366	-0.811426	DOCETAXEL	2.5	SKNDZ_AUTONOMIC_GANGLIA	Female	AUTONOMIC_GANGLIA	Peripheral Nervous System	Neuroblastoma	NA	2	Mutant	3.96924	6.96268	5.49518	3.82146	3.78907	4.65571	NA	High	Low	High_Low
BRD:BRD-K30577245-001-04-3	ACH-000367	-0.54287	DOCETAXEL	2.5	NCIH226_LUNG	Male	LUNG	Lung	Mesothelioma	Pleural Epithelioid Mesothelioma	0	WT	2.45427	6.30646	2.86194	3.53029	NA	2.8974	NA	Low	Low	Low_Low
BRD:BRD-K30577245-001-04-3	ACH-000368	0.0615094	DOCETAXEL	2.5	SNU1105_CENTRAL_NERVOUS_SYSTEM	Unknown	CENTRAL_NERVOUS_SYSTEM	NA	NA	NA	2	Mutant	2.36501	5.25267	4.81991	3.83853	NA	NA	NA	Low	NA	Low_NA
BRD:BRD-K30577245-001-04-3	ACH-000374	-1.78257	DOCETAXEL	2.5	HCC1143_BREAST	Female	BREAST	Breast	Breast Carcinoma	Ductal Breast Carcinoma	2	Mutant	3.22892	7.30122	4.80622	2.69004	4.70194	4.09901	NA	Low	High	Low_High
BRD:BRD-K30577245-001-04-3	ACH-000375	-1.54382	DOCETAXEL	2.5	G402_SOFT_TISSUE	Female	SOFT_TISSUE	Soft Tissue	Other Sarcomas	Epithelioid Cell Type Gastrointestinal Stromal Tumor	0	WT	3.546	5.64418	5.02412	4.33223	NA	4.41025	NA	Low	Low	Low_Low
BRD:BRD-K30577245-001-04-3	ACH-000376	-0.659221	DOCETAXEL	2.5	SF295_CENTRAL_NERVOUS_SYSTEM	Female	CENTRAL_NERVOUS_SYSTEM	Central Nervous System	Glioblastoma	NA	2	Mutant	3.02206	5.47745	4.36678	4.17883	4.06302	3.92227	NA	Low	Low	Low_Low
BRD:BRD-K30577245-001-04-3	ACH-000378	-1.26643	DOCETAXEL	2.5	NCIH647_LUNG	Male	LUNG	Lung	Non-Small Cell Lung Carcinoma	Adenosquamous lung carcinoma	0	WT	3.24492	5.52994	4.04747	4.59503	NA	3.59194	NA	Low	Low	Low_Low
BRD:BRD-K30577245-001-04-3	ACH-000383	0.18058	DOCETAXEL	2.5	OE33_OESOPHAGUS	Female	OESOPHAGUS	Esophagus	Esophageal Carcinoma	Barrett Adenocarcinoma	2	Mutant	3.59355	4.68841	3.78386	3.80011	NA	4.05444	NA	High	Low	High_Low
BRD:BRD-K30577245-001-04-3	ACH-000384	-1.17788	DOCETAXEL	2.5	SW780_URINARY_TRACT	Female	URINARY_TRACT	Bladder	Bladder Carcinoma	NA	0	WT	4.48032	5.54412	6.00031	4.05707	NA	4.25563	NA	High	High	High_High
BRD:BRD-K30577245-001-04-3	ACH-000389	-4.13135	DOCETAXEL	2.5	H4_CENTRAL_NERVOUS_SYSTEM	Male	CENTRAL_NERVOUS_SYSTEM	Central Nervous System	Glioma	Low Grade Glioma	0	WT	3.16772	5.58555	5.43061	4.61515	NA	4.39757	NA	Low	High	Low_High
BRD:BRD-K30577245-001-04-3	ACH-000390	-2.03002	DOCETAXEL	2.5	LUDLU1_LUNG	Unknown	LUNG	NA	NA	NA	2	Mutant	3.50415	5.34386	4.6051	4.70745	NA	NA	NA	High	NA	High_NA
BRD:BRD-K30577245-001-04-3	ACH-000391	-2.00944	DOCETAXEL	2.5	MHHES1_BONE	Male	BONE	Bone	Ewing's Sarcoma	NA	0	WT	3.66266	6.1323	4.57611	5.54048	2.63306	4.04674	NA	Low	High	Low_High
BRD:BRD-K30577245-001-04-3	ACH-000393	-2.54972	DOCETAXEL	2.5	HLF_LIVER	Unknown	LIVER	NA	NA	NA	2	Mutant	2.91928	5.26857	4.31124	4.71201	NA	NA	NA	Low	NA	Low_NA
BRD:BRD-K30577245-001-04-3	ACH-000395	-1.10487	DOCETAXEL	2.5	NCIH520_LUNG	Male	LUNG	Lung	Non-Small Cell Lung Carcinoma	Squamous Cell Lung Carcinoma	2	Mutant	4.21913	3.16402	4.44163	7.4675	NA	3.71257	NA	High	Low	High_Low
BRD:BRD-K30577245-001-04-3	ACH-000396	-2.49468	DOCETAXEL	2.5	J82_URINARY_TRACT	Male	URINARY_TRACT	Bladder	Bladder Carcinoma	NA	1	Mutant	2.45674	4.25545	4.67187	2.64334	NA	3.49803	NA	Low	Low	Low_Low
BRD:BRD-K30577245-001-04-3	ACH-000397	-1.07162	DOCETAXEL	2.5	TEN_ENDOMETRIUM	Female	ENDOMETRIUM	NA	NA	NA	2	Mutant	4.05845	3.38389	5.15018	4.87041	NA	NA	NA	High	NA	High_NA
BRD:BRD-K30577245-001-04-3	ACH-000399	1.23136	DOCETAXEL	2.5	NCIH2196_LUNG	Unknown	LUNG	NA	NA	NA	2	Mutant	4.01195	5.25229	4.7852	5.16453	NA	NA	NA	High	NA	High_NA
BRD:BRD-K30577245-001-04-3	ACH-000401	-3.12922	DOCETAXEL	2.5	COLO800_SKIN	Male	SKIN	Skin	Melanoma	Cutaneous melanoma	2	Mutant	2.92109	6.00332	4.64361	3.38621	NA	3.77155	NA	Low	High	Low_High
BRD:BRD-K30577245-001-04-3	ACH-000403	-2.67075	DOCETAXEL	2.5	NCIH747_LARGE_INTESTINE	Male	LARGE_INTESTINE	Large Intestine	Colorectal Carcinoma	Cecum adenocarcinoma	2	Mutant	3.44602	6.03713	3.56141	4.28651	2.92282	3.8096	NA	Low	Low	Low_Low
BRD:BRD-K30577245-001-04-3	ACH-000404	-1.02126	DOCETAXEL	2.5	K029AX_SKIN	Unknown	SKIN	NA	NA	NA	0	WT	3.17381	4.50415	4.73979	4.09816	NA	NA	NA	Low	NA	Low_NA
BRD:BRD-K30577245-001-04-3	ACH-000407	-2.82052	DOCETAXEL	2.5	SNU685_ENDOMETRIUM	Female	ENDOMETRIUM	NA	NA	NA	0	WT	3.2636	4.06505	4.50718	4.3844	NA	NA	NA	Low	NA	Low_NA
BRD:BRD-K30577245-001-04-3	ACH-000408	-1.13344	DOCETAXEL	2.5	TE5_OESOPHAGUS	Female	OESOPHAGUS	Esophagus	Esophageal Carcinoma	Esophageal Squamous Cell Carcinoma	2	Mutant	4.33117	4.8703	4.16928	5.45185	3.18719	3.44245	NA	High	Low	High_Low
BRD:BRD-K30577245-001-04-3	ACH-000411	-3.72713	DOCETAXEL	2.5	769P_KIDNEY	Female	KIDNEY	Kidney	Kidney Carcinoma	Clear Cell Renal Cell Carcinoma	0	WT	2.18039	5.26593	4.09221	2.26727	NA	3.67798	NA	Low	Low	Low_Low
BRD:BRD-K30577245-001-04-3	ACH-000414	-3.78789	DOCETAXEL	2.5	NCIH1944_LUNG	Female	LUNG	Lung	Non-Small Cell Lung Carcinoma	Lung Adenocarcinoma	0	WT	3.17533	4.37473	3.29544	3.58296	NA	3.0982	NA	Low	Low	Low_Low
BRD:BRD-K30577245-001-04-3	ACH-000415	-1.6867	DOCETAXEL	2.5	BICR6_UPPER_AERODIGESTIVE_TRACT	Unknown	UPPER_AERODIGESTIVE_TRACT	NA	NA	NA	2	Mutant	1.74287	1.47092	1.88913	1.97518	NA	NA	NA	Low	NA	Low_NA
BRD:BRD-K30577245-001-04-3	ACH-000416	-1.3559	DOCETAXEL	2.5	NCIH838_LUNG	Male	LUNG	Lung	Non-Small Cell Lung Carcinoma	Lung Adenocarcinoma	2	Mutant	2.46659	3.19277	3.94713	4.11747	NA	5.18992	NA	Low	High	Low_High
BRD:BRD-K30577245-001-04-3	ACH-000417	-3.18029	DOCETAXEL	2.5	PANC0813_PANCREAS	Male	PANCREAS	Pancreas	Pancreatic Carcinoma	Pancreatic ductal adenocarcinoma	0	WT	3.33468	6.49267	4.5964	4.07775	NA	3.89698	NA	Low	High	Low_High
BRD:BRD-K30577245-001-04-3	ACH-000418	-0.299725	DOCETAXEL	2.5	SW1353_BONE	Unknown	BONE	NA	NA	NA	0	WT	3.26217	4.95569	5.00801	5.22951	NA	NA	NA	Low	NA	Low_NA
BRD:BRD-K30577245-001-04-3	ACH-000420	-3.12417	DOCETAXEL	2.5	SNU449_LIVER	Male	LIVER	Liver	Hepatocellular Carcinoma	NA	2	Mutant	3.00854	5.41214	4.70975	4.09816	2.12237	3.59821	NA	Low	Low	Low_Low
BRD:BRD-K30577245-001-04-3	ACH-000421	-2.55301	DOCETAXEL	2.5	SW837_LARGE_INTESTINE	Male	LARGE_INTESTINE	Large Intestine	Colorectal Carcinoma	Rectal adenocarcinoma	2	Mutant	4.0358	6.00148	5.24363	5.59301	3.01892	4.28851	1.97672	High	High	High_High
BRD:BRD-K30577245-001-04-3	ACH-000423	-1.62688	DOCETAXEL	2.5	SKMEL3_SKIN	Female	SKIN	Skin	Melanoma	Cutaneous melanoma	2	Mutant	3.52821	5.16893	4.49558	4.04313	3.34951	3.47774	NA	High	Low	High_Low
BRD:BRD-K30577245-001-04-3	ACH-000425	-2.6491	DOCETAXEL	2.5	UACC62_SKIN	Unknown	SKIN	Skin	Melanoma	NA	0	WT	2.67448	3.83531	4.14965	3.69204	NA	3.48894	NA	Low	Low	Low_Low
BRD:BRD-K30577245-001-04-3	ACH-000427	-1.2408	DOCETAXEL	2.5	NCIN87_STOMACH	Male	STOMACH	Stomach	Gastric Carcinoma	Gastric tubular adenocarcinoma	2	Mutant	3.47723	5.4008	4.52443	4.24402	4.14384	3.81968	NA	Low	High	Low_High
BRD:BRD-K30577245-001-04-3	ACH-000428	-1.52332	DOCETAXEL	2.5	UO31_KIDNEY	Female	KIDNEY	Kidney	Kidney Carcinoma	NA	0	WT	2.76336	6.28554	3.5668	4.11664	NA	3.45979	NA	Low	Low	Low_Low
BRD:BRD-K30577245-001-04-3	ACH-000429	1.10077	DOCETAXEL	2.5	A704_KIDNEY	Male	KIDNEY	Kidney	Kidney Carcinoma	NA	0	WT	4.53792	3.48715	3.57002	3.31514	NA	4.04275	NA	High	High	High_High
BRD:BRD-K30577245-001-04-3	ACH-000430	-0.482119	DOCETAXEL	2.5	TYKNU_OVARY	Female	OVARY	Ovary	Ovarian Carcinoma	High grade ovarian serous adenocarcinoma	2	Mutant	3.08465	4.75028	4.43498	4.20429	2.55307	4.29133	2.11942	Low	High	Low_High
BRD:BRD-K30577245-001-04-3	ACH-000433	-0.125005	DOCETAXEL	2.5	CAKI1_KIDNEY	Male	KIDNEY	Kidney	Kidney Carcinoma	Clear cell renal cell carcinoma	0	WT	2.36764	4.16012	3.74993	2.71905	NA	4.64807	NA	Low	High	Low_High
BRD:BRD-K30577245-001-04-3	ACH-000434	-1.34344	DOCETAXEL	2.5	NCIH1915_LUNG	Female	LUNG	Lung	Non-Small Cell Lung Carcinoma	NA	0	WT	2.98802	2.97028	3.78479	4.46451	NA	4.04027	1.03288	Low	High	Low_High
BRD:BRD-K30577245-001-04-3	ACH-000435	-3.81269	DOCETAXEL	2.5	EFE184_ENDOMETRIUM	Female	ENDOMETRIUM	NA	NA	NA	2	Mutant	2.11954	5.38206	2.73329	3.28264	NA	NA	NA	Low	NA	Low_NA
BRD:BRD-K30577245-001-04-3	ACH-000437	-1.69975	DOCETAXEL	2.5	SW1088_CENTRAL_NERVOUS_SYSTEM	Male	CENTRAL_NERVOUS_SYSTEM	Central Nervous System	Glioma	Low Grade Glioma	2	Mutant	3.65173	5.70708	4.94268	4.41501	4.08575	3.61506	NA	High	Low	High_Low
BRD:BRD-K30577245-001-04-3	ACH-000441	-0.607104	DOCETAXEL	2.5	SH4_SKIN	Female	SKIN	Skin	Melanoma	NA	0	WT	3.60379	3.99991	4.58052	3.57706	NA	4.3888	NA	High	High	High_High
BRD:BRD-K30577245-001-04-3	ACH-000443	0.236025	DOCETAXEL	2.5	OVKATE_OVARY	Female	OVARY	Ovary	Ovarian Carcinoma	High grade ovarian serous adenocarcinoma	2	Mutant	3.04543	4.77192	5.11384	3.87504	NA	4.44498	NA	Low	High	Low_High
BRD:BRD-K30577245-001-04-3	ACH-000444	-1.65069	DOCETAXEL	2.5	LU99_LUNG	Unknown	LUNG	NA	NA	NA	0	WT	3.00684	4.04648	5.14716	3.34972	NA	NA	NA	Low	NA	Low_NA
BRD:BRD-K30577245-001-04-3	ACH-000445	-4.09898	DOCETAXEL	2.5	KNS60_CENTRAL_NERVOUS_SYSTEM	Unknown	CENTRAL_NERVOUS_SYSTEM	NA	NA	NA	2	Mutant	3.6681	6.34006	4.99383	4.44369	NA	NA	NA	High	NA	High_NA
BRD:BRD-K30577245-001-04-3	ACH-000447	-1.7289	DOCETAXEL	2.5	NCIH2228_LUNG	Female	LUNG	Lung	Non-Small Cell Lung Carcinoma	Lung Adenocarcinoma	2	Mutant	3.1859	3.40356	4.54091	5.19277	NA	4.29162	NA	Low	High	Low_High
BRD:BRD-K30577245-001-04-3	ACH-000449	-1.4229	DOCETAXEL	2.5	MESSA_SOFT_TISSUE	Female	SOFT_TISSUE	Soft Tissue	Other Sarcomas	Uterine Corpus Sarcoma	0	WT	3.24636	6.14623	5.66202	3.85541	NA	5.12099	NA	Low	High	Low_High
BRD:BRD-K30577245-001-04-3	ACH-000452	-1.3873	DOCETAXEL	2.5	TE8_OESOPHAGUS	Male	OESOPHAGUS	Esophagus	Esophageal Carcinoma	Esophageal Squamous Cell Carcinoma	2	Mutant	3.25788	5.81245	5.64003	3.69423	2.31101	4.59538	NA	Low	High	Low_High
BRD:BRD-K30577245-001-04-3	ACH-000454	-1.09137	DOCETAXEL	2.5	HCC95_LUNG	Unknown	LUNG	NA	NA	NA	0	WT	3.94877	4.12748	4.83349	5.24614	NA	NA	NA	High	NA	High_NA
BRD:BRD-K30577245-001-04-3	ACH-000456	-4.37736	DOCETAXEL	2.5	BCPAP_THYROID	Female	THYROID	Thyroid	Thyroid Gland Carcinoma	Poorly differentiated thyroid gland carcinoma	2	Mutant	2.98284	6.08689	5.25637	4.52345	4.17263	4.30107	NA	Low	High	Low_High
BRD:BRD-K30577245-001-04-3	ACH-000457	-0.0303665	DOCETAXEL	2.5	CAL54_KIDNEY	Male	KIDNEY	Kidney	Kidney Carcinoma	NA	0	WT	3.71927	6.12975	4.92567	3.06041	NA	5.21837	NA	High	High	High_High
BRD:BRD-K30577245-001-04-3	ACH-000458	-2.61256	DOCETAXEL	2.5	CJM_SKIN	Unknown	SKIN	NA	NA	NA	2	Mutant	2.20989	5.0422	4.58821	1.9982	NA	NA	NA	Low	NA	Low_NA
BRD:BRD-K30577245-001-04-3	ACH-000461	-0.467428	DOCETAXEL	2.5	SNU1196_BILIARY_TRACT	Unknown	BILIARY_TRACT	NA	NA	NA	2	Mutant	3.36698	7.25171	3.18331	2.446	NA	NA	NA	Low	NA	Low_NA
BRD:BRD-K30577245-001-04-3	ACH-000463	-3.12949	DOCETAXEL	2.5	NCIH460_LUNG	Male	LUNG	Lung	Non-Small Cell Lung Carcinoma	Lung large cell carcinoma	0	WT	3.24492	4.68174	4.44765	4.07089	NA	3.9823	NA	Low	High	Low_High
BRD:BRD-K30577245-001-04-3	ACH-000464	-1.18607	DOCETAXEL	2.5	CAS1_CENTRAL_NERVOUS_SYSTEM	Male	CENTRAL_NERVOUS_SYSTEM	Central Nervous System	Glioblastoma	NA	2	Mutant	2.50294	5.84796	4.32042	3.85245	4.37285	4.3438	NA	Low	High	Low_High
BRD:BRD-K30577245-001-04-3	ACH-000466	-0.367346	DOCETAXEL	2.5	SNU216_STOMACH	Unknown	STOMACH	NA	NA	NA	2	Mutant	3.42057	6.44402	4.7057	4.41225	NA	NA	NA	Low	NA	Low_NA
BRD:BRD-K30577245-001-04-3	ACH-000467	-1.97824	DOCETAXEL	2.5	HCC56_LARGE_INTESTINE	Unknown	LARGE_INTESTINE	NA	NA	NA	2	Mutant	3.09749	5.6715	5.97771	3.58766	NA	NA	NA	Low	NA	Low_NA
BRD:BRD-K30577245-001-04-3	ACH-000469	-3.00487	DOCETAXEL	2.5	YH13_CENTRAL_NERVOUS_SYSTEM	Male	CENTRAL_NERVOUS_SYSTEM	Central Nervous System	Glioblastoma	NA	2	Mutant	3.41414	4.68619	5.04493	4.38017	1.77071	4.48728	NA	High	High	High_High
BRD:BRD-K30577245-001-04-3	ACH-000470	-1.35198	DOCETAXEL	2.5	SW1463_LARGE_INTESTINE	Female	LARGE_INTESTINE	Large Intestine	Colorectal Carcinoma	Rectal adenocarcinoma	2	Mutant	4.01452	5.24733	2.74259	3.2926	4.53223	3.16969	NA	High	Low	High_Low
BRD:BRD-K30577245-001-04-3	ACH-000471	-2.55273	DOCETAXEL	2.5	LI7_LIVER	Unknown	LIVER	NA	NA	NA	0	WT	4.3961	2.72345	4.9496	4.76461	NA	NA	NA	High	NA	High_NA
BRD:BRD-K30577245-001-04-3	ACH-000472	-0.526721	DOCETAXEL	2.5	HSC2_UPPER_AERODIGESTIVE_TRACT	Male	UPPER_AERODIGESTIVE_TRACT	Head and Neck	Head and Neck Carcinoma	Oral Cavity Squamous Cell Carcinoma	0	WT	2.39623	3.49942	3.56357	3.86034	NA	3.30734	NA	Low	Low	Low_Low
BRD:BRD-K30577245-001-04-3	ACH-000473	-0.676481	DOCETAXEL	2.5	RT112_URINARY_TRACT	Female	URINARY_TRACT	Bladder	Bladder Carcinoma	NA	1	Mutant	3.71508	5.42577	4.43316	4.16594	2.21812	4.09127	NA	High	Low	High_Low
BRD:BRD-K30577245-001-04-3	ACH-000475	-1.34217	DOCETAXEL	2.5	HUH1_LIVER	Male	LIVER	Liver	Hepatocellular Carcinoma	NA	2	Mutant	2.92289	5.09511	4.36361	3.26396	NA	3.72977	NA	Low	Low	Low_Low
BRD:BRD-K30577245-001-04-3	ACH-000476	-2.70146	DOCETAXEL	2.5	JHH4_LIVER	Male	LIVER	Liver	Hepatocellular Carcinoma	NA	2	Mutant	3.40638	5.18693	4.96804	3.72031	NA	4.37314	NA	Low	High	Low_High
BRD:BRD-K30577245-001-04-3	ACH-000477	0.461672	DOCETAXEL	2.5	MALME3M_SKIN	Unknown	SKIN	NA	NA	NA	0	WT	3.5659	5.00855	4.69706	3.04883	NA	NA	NA	High	NA	High_NA
BRD:BRD-K30577245-001-04-3	ACH-000479	-2.45058	DOCETAXEL	2.5	KNS81_CENTRAL_NERVOUS_SYSTEM	Unknown	CENTRAL_NERVOUS_SYSTEM	NA	NA	NA	0	WT	4.10433	6.35147	4.72084	4.35173	NA	NA	NA	High	NA	High_NA
BRD:BRD-K30577245-001-04-3	ACH-000480	0.0554576	DOCETAXEL	2.5	HUH7_LIVER	Male	LIVER	Liver	Hepatocellular Carcinoma	NA	2	Mutant	4.11798	6.23354	3.93452	2.98789	NA	4.01214	NA	High	Low	High_Low
BRD:BRD-K30577245-001-04-3	ACH-000481	-2.10288	DOCETAXEL	2.5	NCIH2170_LUNG	Male	LUNG	Lung	Non-Small Cell Lung Carcinoma	Squamous Cell Lung Carcinoma	2	Mutant	3.63407	5.31127	3.15676	4.0475	NA	3.22341	NA	High	Low	High_Low
BRD:BRD-K30577245-001-04-3	ACH-000482	-0.000629962	DOCETAXEL	2.5	RERFLCKJ_LUNG	Male	LUNG	Lung	Non-Small Cell Lung Carcinoma	Lung Adenocarcinoma	0	WT	4.16052	3.90221	5.24647	3.44262	NA	4.78127	NA	High	High	High_High
BRD:BRD-K30577245-001-04-3	ACH-000483	-0.0647102	DOCETAXEL	2.5	SNU182_LIVER	Unknown	LIVER	NA	NA	NA	2	Mutant	3.29468	5.05831	4.30729	4.01218	NA	NA	NA	Low	NA	Low_NA
BRD:BRD-K30577245-001-04-3	ACH-000484	-1.44557	DOCETAXEL	2.5	VMRCRCW_KIDNEY	Male	KIDNEY	Kidney	Kidney Carcinoma	NA	0	WT	5.30351	5.46692	4.47269	3.11862	NA	3.60782	NA	High	Low	High_Low
BRD:BRD-K30577245-001-04-3	ACH-000485	-1.19582	DOCETAXEL	2.5	GSU_STOMACH	Unknown	STOMACH	NA	NA	NA	1	Mutant	3.31413	5.72248	3.75088	3.47197	NA	NA	NA	Low	NA	Low_NA
BRD:BRD-K30577245-001-04-3	ACH-000486	-1.32012	DOCETAXEL	2.5	KU1919_URINARY_TRACT	Female	URINARY_TRACT	Bladder	Bladder Carcinoma	NA	0	WT	2.73296	4.38968	4.50718	2.77943	NA	4.9821	NA	Low	High	Low_High
BRD:BRD-K30577245-001-04-3	ACH-000488	-3.56629	DOCETAXEL	2.5	TE11_OESOPHAGUS	Male	OESOPHAGUS	Esophagus	Esophageal Carcinoma	Esophageal Squamous Cell Carcinoma	2	Mutant	2.41921	5.27608	3.81704	3.47702	2.86937	4.47394	NA	Low	High	Low_High
BRD:BRD-K30577245-001-04-3	ACH-000489	-1.76586	DOCETAXEL	2.5	SW1116_LARGE_INTESTINE	Male	LARGE_INTESTINE	Large Intestine	Colorectal Carcinoma	Colon adenocarcinoma	2	Mutant	3.21275	5.75525	2.60492	3.45417	3.40858	3.10381	NA	Low	Low	Low_Low
BRD:BRD-K30577245-001-04-3	ACH-000493	-3.15721	DOCETAXEL	2.5	SNU423_LIVER	Male	LIVER	Liver	Hepatocellular Carcinoma	NA	0	WT	3.28486	6.1675	4.08612	4.56904	NA	2.57759	1.54224	Low	Low	Low_Low
BRD:BRD-K30577245-001-04-3	ACH-000495	-0.352029	DOCETAXEL	2.5	TUHR4TKB_KIDNEY	Unknown	KIDNEY	NA	NA	NA	0	WT	3.65721	4.82293	3.91756	4.12247	NA	NA	NA	High	NA	High_NA
BRD:BRD-K30577245-001-04-3	ACH-000496	-2.29462	DOCETAXEL	2.5	NCIH1792_LUNG	Male	LUNG	Lung	Non-Small Cell Lung Carcinoma	Lung Adenocarcinoma	0	WT	3.68106	2.14642	4.81803	3.53515	NA	3.94075	NA	High	High	High_High
BRD:BRD-K30577245-001-04-3	ACH-000499	-3.06184	DOCETAXEL	2.5	EW8_BONE	Unknown	BONE	NA	NA	NA	2	Mutant	3.79484	5.98028	4.81237	4.10238	NA	NA	NA	Low	NA	Low_NA
BRD:BRD-K30577245-001-04-3	ACH-000500	-2.96947	DOCETAXEL	2.5	SNU46_UPPER_AERODIGESTIVE_TRACT	Unknown	UPPER_AERODIGESTIVE_TRACT	NA	NA	NA	2	Mutant	3.39598	6.32876	4.33344	4.73517	NA	NA	NA	High	NA	High_NA
BRD:BRD-K30577245-001-04-3	ACH-000502	-1.63392	DOCETAXEL	2.5	TCCPAN2_PANCREAS	Unknown	PANCREAS	NA	NA	NA	0	WT	3.91154	2.185	3.90471	3.38488	NA	NA	NA	High	NA	High_NA
BRD:BRD-K30577245-001-04-3	ACH-000503	-1.49717	DOCETAXEL	2.5	BICR16_UPPER_AERODIGESTIVE_TRACT	Unknown	UPPER_AERODIGESTIVE_TRACT	NA	NA	NA	2	Mutant	2.80099	2.78562	3.42365	3.33736	NA	NA	NA	Low	NA	Low_NA
BRD:BRD-K30577245-001-04-3	ACH-000504	-1.77362	DOCETAXEL	2.5	SNB75_CENTRAL_NERVOUS_SYSTEM	Female	CENTRAL_NERVOUS_SYSTEM	Central Nervous System	Glioblastoma	NA	2	Mutant	3.19491	6.19885	4.53013	4.38861	NA	3.95648	NA	Low	Low	Low_Low
BRD:BRD-K30577245-001-04-3	ACH-000505	-0.803517	DOCETAXEL	2.5	RKN_SOFT_TISSUE	Female	SOFT_TISSUE	Soft Tissue	Leiomyosarcoma	Ovarian Leiomyosarcoma	2	Mutant	3.1859	5.57423	5.50329	3.9069	0.51932	3.72856	NA	Low	Low	Low_Low
BRD:BRD-K30577245-001-04-3	ACH-000507	-2.21967	DOCETAXEL	2.5	KE39_STOMACH	Unknown	STOMACH	NA	NA	NA	2	Mutant	3.96393	5.40183	4.03804	5.23561	NA	NA	NA	High	NA	High_NA
BRD:BRD-K30577245-001-04-3	ACH-000510	-1.39114	DOCETAXEL	2.5	NCIH1299_LUNG	Male	LUNG	Lung	Non-Small Cell Lung Carcinoma	Lung large cell carcinoma	0	WT	2.78526	4.57031	4.49267	3.9521	NA	4.18868	NA	Low	High	Low_High
BRD:BRD-K30577245-001-04-3	ACH-000516	-1.08807	DOCETAXEL	2.5	CAL78_BONE	Male	BONE	Bone	Chondrosarcoma	NA	0	WT	4.32354	5.49828	5.11152	4.38229	NA	3.7557	NA	High	Low	High_Low
BRD:BRD-K30577245-001-04-3	ACH-000517	0.758557	DOCETAXEL	2.5	SNU410_PANCREAS	Unknown	PANCREAS	NA	NA	NA	2	Mutant	3.31716	4.98833	4.26528	4.08506	NA	NA	NA	Low	NA	Low_NA
BRD:BRD-K30577245-001-04-3	ACH-000518	-1.45936	DOCETAXEL	2.5	CAL33_UPPER_AERODIGESTIVE_TRACT	Male	UPPER_AERODIGESTIVE_TRACT	Head and Neck	Head and Neck Carcinoma	Tongue Squamous Cell Carcinoma	2	Mutant	3.08948	5.88765	4.54711	5.19944	3.29483	3.34323	NA	High	Low	High_Low
BRD:BRD-K30577245-001-04-3	ACH-000521	-2.36611	DOCETAXEL	2.5	NCIH2030_LUNG	Male	LUNG	Lung	Non-Small Cell Lung Carcinoma	Lung Adenocarcinoma	2	Mutant	3.52223	5.52899	5.6444	4.63979	1.82407	5.21584	NA	High	High	High_High
BRD:BRD-K30577245-001-04-3	ACH-000524	-1.50744	DOCETAXEL	2.5	KURAMOCHI_OVARY	Female	OVARY	Ovary	Ovarian Carcinoma	High grade ovarian serous adenocarcinoma	2	Mutant	3.44602	6.80145	4.30663	4.75689	4.8391	3.8327	1.58398	High	Low	High_Low
BRD:BRD-K30577245-001-04-3	ACH-000527	-0.713605	DOCETAXEL	2.5	OVISE_OVARY	Female	OVARY	Ovary	Ovarian Carcinoma	Ovarian clear cell adenocarcinoma	0	WT	3.19939	5.11234	4.19791	3.94092	NA	3.8125	NA	Low	Low	Low_Low
BRD:BRD-K30577245-001-04-3	ACH-000528	-0.822852	DOCETAXEL	2.5	ABC1_LUNG	Male	LUNG	Lung	Non-Small Cell Lung Carcinoma	Lung Adenocarcinoma	2	Mutant	4.36534	6.44454	3.76416	4.88321	2.88178	3.84871	NA	High	Low	High_Low
BRD:BRD-K30577245-001-04-3	ACH-000530	-1.77104	DOCETAXEL	2.5	NA	Male	NA	Lung	Small Cell Lung Carcinoma	NA	2	Mutant	4.12436	3.27301	5.5297	3.85936	NA	5.13826	NA	High	High	High_High
BRD:BRD-K30577245-001-04-3	ACH-000532	-2.60337	DOCETAXEL	2.5	SNU61_LARGE_INTESTINE	Male	LARGE_INTESTINE	Large Intestine	Colorectal Carcinoma	Rectal adenocarcinoma	2	Mutant	3.58182	5.94338	3.2779	4.23982	NA	4.09849	0.04254	Low	High	Low_High
BRD:BRD-K30577245-001-04-3	ACH-000533	-0.474412	DOCETAXEL	2.5	NCIH2004RT_SOFT_TISSUE	Unknown	SOFT_TISSUE	NA	NA	NA	0	WT	2.47393	5.94756	4.28135	3.95581	NA	NA	NA	Low	NA	Low_NA
BRD:BRD-K30577245-001-04-3	ACH-000535	-1.48351	DOCETAXEL	2.5	BXPC3_PANCREAS	Female	PANCREAS	Pancreas	Pancreatic Carcinoma	Pancreatic ductal adenocarcinoma	2	Mutant	2.42427	6.0651	4.05528	4.5183	0.96498	3.38109	NA	Low	Low	Low_Low
BRD:BRD-K30577245-001-04-3	ACH-000537	-0.909627	DOCETAXEL	2.5	SNU761_LIVER	Unknown	LIVER	NA	NA	NA	0	WT	2.93543	3.0662	5.05784	2.62164	NA	NA	NA	Low	NA	Low_NA
BRD:BRD-K30577245-001-04-3	ACH-000542	-0.460037	DOCETAXEL	2.5	HEYA8_OVARY	Female	OVARY	NA	NA	NA	0	WT	2.48124	5.27908	3.04865	3.52541	NA	NA	NA	Low	NA	Low_NA
BRD:BRD-K30577245-001-04-3	ACH-000543	-0.857922	DOCETAXEL	2.5	SNU489_CENTRAL_NERVOUS_SYSTEM	Unknown	CENTRAL_NERVOUS_SYSTEM	NA	NA	NA	0	WT	2.49814	4.45902	4.72984	3.87991	NA	NA	NA	Low	NA	Low_NA
BRD:BRD-K30577245-001-04-3	ACH-000544	-3.287	DOCETAXEL	2.5	OE21_OESOPHAGUS	Male	OESOPHAGUS	Esophagus	Esophageal Carcinoma	Esophageal Squamous Cell Carcinoma	0	WT	2.06577	1.72201	2.92239	2.5363	NA	3.67811	NA	Low	Low	Low_Low
BRD:BRD-K30577245-001-04-3	ACH-000545	-1.2904	DOCETAXEL	2.5	VMCUB1_URINARY_TRACT	Unknown	URINARY_TRACT	NA	NA	NA	2	Mutant	4.27765	5.19486	5.10413	3.8164	NA	NA	NA	High	NA	High_NA
BRD:BRD-K30577245-001-04-3	ACH-000547	-1.89365	DOCETAXEL	2.5	HT1197_URINARY_TRACT	Male	URINARY_TRACT	Bladder	Bladder Carcinoma	NA	0	WT	2.86601	5.32657	2.87389	4.45313	NA	3.40589	NA	Low	Low	Low_Low
BRD:BRD-K30577245-001-04-3	ACH-000548	0.476406	DOCETAXEL	2.5	BHY_UPPER_AERODIGESTIVE_TRACT	Male	UPPER_AERODIGESTIVE_TRACT	Head and Neck	Head and Neck Carcinoma	Head and Neck Squamous Cell Carcinoma	0	WT	3.34957	3.5803	4.67859	4.02906	NA	4.01614	NA	High	High	High_High
BRD:BRD-K30577245-001-04-3	ACH-000549	-3.87836	DOCETAXEL	2.5	SNU1076_UPPER_AERODIGESTIVE_TRACT	Unknown	UPPER_AERODIGESTIVE_TRACT	NA	NA	NA	0	WT	3.16008	3.16707	4.37437	4.81282	NA	NA	NA	High	NA	High_NA
BRD:BRD-K30577245-001-04-3	ACH-000552	-3.05379	DOCETAXEL	2.5	HT29_LARGE_INTESTINE	Female	LARGE_INTESTINE	Large Intestine	Colorectal Carcinoma	Colon adenocarcinoma	2	Mutant	4.02818	5.82966	4.71681	4.35818	4.38313	4.20714	NA	High	High	High_High
BRD:BRD-K30577245-001-04-3	ACH-000553	-1.20047	DOCETAXEL	2.5	SQ1_LUNG	Unknown	LUNG	NA	NA	NA	0	WT	3.35227	3.32055	3.58922	4.29174	NA	NA	NA	Low	NA	Low_NA
BRD:BRD-K30577245-001-04-3	ACH-000555	-0.591021	DOCETAXEL	2.5	A498_KIDNEY	Female	KIDNEY	Kidney	Kidney Carcinoma	NA	0	WT	3.509	5.52423	4.83022	2.57731	NA	4.69792	NA	High	High	High_High
BRD:BRD-K30577245-001-04-3	ACH-000561	-2.22088	DOCETAXEL	2.5	TT_OESOPHAGUS	Male	OESOPHAGUS	Esophagus	Esophageal Carcinoma	Esophageal Squamous Cell Carcinoma	1	Mutant	3.8865	4.75452	5.06625	3.41533	2.97113	4.67734	NA	High	High	High_High
BRD:BRD-K30577245-001-04-3	ACH-000562	0.476154	DOCETAXEL	2.5	HCC78_LUNG	Male	LUNG	Lung	Non-Small Cell Lung Carcinoma	Lung Adenocarcinoma	2	Mutant	2.66379	4.24283	4.43437	3.9632	2.90207	4.38087	2.09297	Low	High	Low_High
BRD:BRD-K30577245-001-04-3	ACH-000563	-2.17489	DOCETAXEL	2.5	EBC1_LUNG	Male	LUNG	Lung	Non-Small Cell Lung Carcinoma	Squamous Cell Lung Carcinoma	2	Mutant	3.14158	2.70283	4.00539	3.67327	NA	3.62261	NA	Low	Low	Low_Low
BRD:BRD-K30577245-001-04-3	ACH-000565	-3.355	DOCETAXEL	2.5	RCM1_LARGE_INTESTINE	Female	LARGE_INTESTINE	Large Intestine	Colorectal Carcinoma	Rectal adenocarcinoma	2	Mutant	3.40638	2.92441	4.21061	3.1547	NA	4.09352	NA	Low	High	Low_High
BRD:BRD-K30577245-001-04-3	ACH-000566	-4.3089	DOCETAXEL	2.5	SW1710_URINARY_TRACT	Female	URINARY_TRACT	Bladder	Bladder Carcinoma	NA	2	Mutant	3.3855	5.3392	4.57223	3.74701	4.14516	3.28443	NA	High	Low	High_Low
BRD:BRD-K30577245-001-04-3	ACH-000569	-2.75695	DOCETAXEL	2.5	ISTMES1_PLEURA	Female	PLEURA	Lung	Mesothelioma	Pleural Epithelioid Mesothelioma	0	WT	2.77336	6.39232	3.63205	3.57942	NA	3.32483	NA	Low	Low	Low_Low
BRD:BRD-K30577245-001-04-3	ACH-000570	-1.95133	DOCETAXEL	2.5	YKG1_CENTRAL_NERVOUS_SYSTEM	Female	CENTRAL_NERVOUS_SYSTEM	Central Nervous System	Glioblastoma	NA	0	WT	3.59355	6.73338	5.56114	4.15376	NA	4.49076	NA	High	High	High_High
BRD:BRD-K30577245-001-04-3	ACH-000571	-4.06999	DOCETAXEL	2.5	T98G_CENTRAL_NERVOUS_SYSTEM	Male	CENTRAL_NERVOUS_SYSTEM	Central Nervous System	Glioblastoma	NA	2	Mutant	3.53297	6.6173	5.45677	4.35245	3.3825	3.45725	2.12732	High	Low	High_Low
BRD:BRD-K30577245-001-04-3	ACH-000572	-0.415755	DOCETAXEL	2.5	G361_SKIN	Male	SKIN	Skin	Melanoma	NA	0	WT	3.74421	3.59069	5.21167	3.64299	NA	4.66117	NA	High	High	High_High
BRD:BRD-K30577245-001-04-3	ACH-000573	-2.45131	DOCETAXEL	2.5	MDAMB436_BREAST	Female	BREAST	Breast	Breast Carcinoma	Invasive Ductal Carcinoma of No Special Type	0	WT	3.8097	5.06264	6.04702	3.59469	NA	4.22769	NA	High	High	High_High
BRD:BRD-K30577245-001-04-3	ACH-000579	-2.54712	DOCETAXEL	2.5	UACC257_SKIN	Unknown	SKIN	Skin	Melanoma	NA	0	WT	3.12285	4.46738	4.31387	4.50535	NA	3.86841	NA	Low	High	Low_High
BRD:BRD-K30577245-001-04-3	ACH-000580	-3.28254	DOCETAXEL	2.5	C32_SKIN	Male	SKIN	Skin	Melanoma	Cutaneous melanoma	0	WT	3.00002	4.92997	4.82132	3.45545	NA	4.68426	NA	Low	High	Low_High
BRD:BRD-K30577245-001-04-3	ACH-000582	-1.83299	DOCETAXEL	2.5	COLO741_SKIN	Unknown	SKIN	NA	NA	NA	0	WT	3.34688	3.69722	4.78808	4.49426	NA	NA	NA	Low	NA	Low_NA
BRD:BRD-K30577245-001-04-3	ACH-000587	-2.60394	DOCETAXEL	2.5	NCIH1975_LUNG	Female	LUNG	Lung	Non-Small Cell Lung Carcinoma	Lung Adenocarcinoma	2	Mutant	3.09589	6.53072	4.53184	4.42737	3.83666	3.88759	NA	Low	Low	Low_Low
BRD:BRD-K30577245-001-04-3	ACH-000589	-2.62734	DOCETAXEL	2.5	NCIH1437_LUNG	Male	LUNG	Lung	Non-Small Cell Lung Carcinoma	Lung Adenocarcinoma	2	Mutant	3.41414	3.82845	3.9303	4.38158	NA	3.69239	1.06067	Low	Low	Low_Low
BRD:BRD-K30577245-001-04-3	ACH-000590	0.59753	DOCETAXEL	2.5	NA	Unknown	NA	NA	NA	NA	1	Mutant	3.25931	4.65932	3.54514	1.79259	NA	NA	NA	Low	NA	Low_NA
BRD:BRD-K30577245-001-04-3	ACH-000592	-2.12616	DOCETAXEL	2.5	TM31_CENTRAL_NERVOUS_SYSTEM	Unknown	CENTRAL_NERVOUS_SYSTEM	NA	NA	NA	2	Mutant	3.84764	5.04001	4.43134	5.07885	NA	NA	NA	High	NA	High_NA
BRD:BRD-K30577245-001-04-3	ACH-000593	-2.32348	DOCETAXEL	2.5	BC3C_URINARY_TRACT	Unknown	URINARY_TRACT	NA	NA	NA	2	Mutant	3.36298	6.25791	4.54429	4.31616	NA	NA	NA	Low	NA	Low_NA
BRD:BRD-K30577245-001-04-3	ACH-000595	-0.94796	DOCETAXEL	2.5	LN229_CENTRAL_NERVOUS_SYSTEM	Female	CENTRAL_NERVOUS_SYSTEM	Central Nervous System	Glioblastoma	NA	0	WT	3.67675	5.30834	4.54373	2.59074	NA	3.70584	NA	High	Low	High_Low
BRD:BRD-K30577245-001-04-3	ACH-000597	-1.51405	DOCETAXEL	2.5	TTC709_SOFT_TISSUE	Unknown	SOFT_TISSUE	NA	NA	NA	0	WT	5.44778	5.99639	4.38949	4.53162	NA	NA	NA	High	NA	High_NA
BRD:BRD-K30577245-001-04-3	ACH-000599	-1.29895	DOCETAXEL	2.5	PATU8902_PANCREAS	Female	PANCREAS	Pancreas	Pancreatic Carcinoma	Pancreatic adenocarcinoma	2	Mutant	2.88644	6.76655	4.20921	5.05393	4.83305	3.5949	NA	Low	Low	Low_Low
BRD:BRD-K30577245-001-04-3	ACH-000601	-1.69563	DOCETAXEL	2.5	MIAPACA2_PANCREAS	Male	PANCREAS	Pancreas	Pancreatic Carcinoma	Pancreatic ductal adenocarcinoma	2	Mutant	2.75128	6.02192	3.91157	3.39288	4.66259	3.21672	NA	Low	Low	Low_Low
BRD:BRD-K30577245-001-04-3	ACH-000603	-1.63634	DOCETAXEL	2.5	BEN_LUNG	Male	LUNG	Lung	Non-Small Cell Lung Carcinoma	NA	2	Mutant	3.67027	3.8994	4.70266	3.38354	NA	4.784	NA	High	High	High_High
BRD:BRD-K30577245-001-04-3	ACH-000605	-4.86129	DOCETAXEL	2.5	TE6_OESOPHAGUS	Male	OESOPHAGUS	Esophagus	Esophageal Carcinoma	Esophageal Squamous Cell Carcinoma	2	Mutant	3.80179	6.25225	5.1517	4.99482	3.18362	4.37109	NA	High	High	High_High
BRD:BRD-K30577245-001-04-3	ACH-000608	-0.836419	DOCETAXEL	2.5	COV644_OVARY	Female	OVARY	NA	NA	NA	0	WT	4.31936	1.4662	3.42247	4.11664	NA	NA	NA	High	NA	High_NA
BRD:BRD-K30577245-001-04-3	ACH-000609	-3.66255	DOCETAXEL	2.5	SF126_CENTRAL_NERVOUS_SYSTEM	Female	CENTRAL_NERVOUS_SYSTEM	Central Nervous System	Glioblastoma	NA	0	WT	3.2693	2.43789	5.34766	4.62481	NA	4.17849	NA	Low	High	Low_High
BRD:BRD-K30577245-001-04-3	ACH-000613	-0.0591445	DOCETAXEL	2.5	HOS_BONE	Female	BONE	Bone	Osteosarcoma	NA	2	Mutant	3.57518	6.64574	4.85798	4.29769	2.87303	3.47386	NA	Low	Low	Low_Low
BRD:BRD-K30577245-001-04-3	ACH-000616	-1.13576	DOCETAXEL	2.5	NA	Male	NA	Stomach	Gastric Carcinoma	Gastric adenocarcinoma	0	WT	3.39728	3.13783	5.28707	5.25419	NA	4.39921	NA	High	High	High_High
BRD:BRD-K30577245-001-04-3	ACH-000617	-0.853566	DOCETAXEL	2.5	NA	Female	NA	Ovary	Ovarian Carcinoma	High grade ovarian serous adenocarcinoma	2	Mutant	3.03546	4.855	3.62793	4.54578	2.88077	2.97114	NA	Low	Low	Low_Low
BRD:BRD-K30577245-001-04-3	ACH-000618	-3.45234	DOCETAXEL	2.5	SNU1041_UPPER_AERODIGESTIVE_TRACT	Unknown	UPPER_AERODIGESTIVE_TRACT	NA	NA	NA	2	Mutant	3.95145	5.46494	3.93874	3.3346	NA	NA	NA	High	NA	High_NA
BRD:BRD-K30577245-001-04-3	ACH-000619	-2.32718	DOCETAXEL	2.5	PECAPJ15_UPPER_AERODIGESTIVE_TRACT	Male	UPPER_AERODIGESTIVE_TRACT	Head and Neck	Head and Neck Carcinoma	Tongue Squamous Cell Carcinoma	2	Mutant	2.53139	5.60525	4.34249	3.55445	4.12376	4.44442	NA	Low	High	Low_High
BRD:BRD-K30577245-001-04-3	ACH-000620	-1.68693	DOCETAXEL	2.5	JHH1_LIVER	Male	LIVER	Liver	Hepatocellular Carcinoma	NA	0	WT	5.04782	4.85153	4.41791	3.93343	NA	4.27184	NA	High	High	High_High
BRD:BRD-K30577245-001-04-3	ACH-000622	-2.52571	DOCETAXEL	2.5	KNS42_CENTRAL_NERVOUS_SYSTEM	Male	CENTRAL_NERVOUS_SYSTEM	Central Nervous System	Glioblastoma	NA	2	Mutant	4.0358	4.98372	5.98688	5.24089	NA	5.19955	NA	High	High	High_High
BRD:BRD-K30577245-001-04-3	ACH-000623	-1.76024	DOCETAXEL	2.5	SNU201_CENTRAL_NERVOUS_SYSTEM	Unknown	CENTRAL_NERVOUS_SYSTEM	NA	NA	NA	1	Mutant	3.03713	6.92487	5.49398	3.94373	NA	NA	NA	Low	NA	Low_NA
BRD:BRD-K30577245-001-04-3	ACH-000624	-2.75756	DOCETAXEL	2.5	HCC1806_BREAST	Female	BREAST	Breast	Breast Carcinoma	Breast squamous cell carcinoma	0	WT	2.73296	3.84116	4.45903	4.30437	NA	4.72365	NA	Low	High	Low_High
BRD:BRD-K30577245-001-04-3	ACH-000625	-1.39314	DOCETAXEL	2.5	HEP3B217_LIVER	Male	LIVER	Liver	Hepatocellular Carcinoma	NA	0	WT	3.75243	4.48271	4.26312	2.58404	NA	3.23904	NA	High	Low	High_Low
BRD:BRD-K30577245-001-04-3	ACH-000627	-4.04289	DOCETAXEL	2.5	LCLC103H_LUNG	Male	LUNG	Lung	Non-Small Cell Lung Carcinoma	Lung large cell carcinoma	2	Mutant	2.5662	5.5331	4.91379	4.13077	NA	3.91428	NA	Low	Low	Low_Low
BRD:BRD-K30577245-001-04-3	ACH-000628	0.0254159	DOCETAXEL	2.5	NCIH596_LUNG	Male	LUNG	Lung	Non-Small Cell Lung Carcinoma	Adenosquamous lung carcinoma	2	Mutant	3.30166	6.37636	5.13231	4.44233	1.84835	4.52063	NA	Low	High	Low_High
BRD:BRD-K30577245-001-04-3	ACH-000630	-0.41326	DOCETAXEL	2.5	YD8_UPPER_AERODIGESTIVE_TRACT	Unknown	UPPER_AERODIGESTIVE_TRACT	NA	NA	NA	2	Mutant	3.56241	6.86202	5.16673	3.89924	NA	NA	NA	High	NA	High_NA
BRD:BRD-K30577245-001-04-3	ACH-000631	-0.187833	DOCETAXEL	2.5	KS1_CENTRAL_NERVOUS_SYSTEM	Female	CENTRAL_NERVOUS_SYSTEM	Central Nervous System	Glioblastoma	NA	0	WT	3.59012	5.59771	4.87621	4.044	NA	4.36572	NA	High	High	High_High
BRD:BRD-K30577245-001-04-3	ACH-000637	-1.25222	DOCETAXEL	2.5	KYSE520_OESOPHAGUS	Female	OESOPHAGUS	Esophagus	Esophageal Carcinoma	Esophageal Squamous Cell Carcinoma	0	WT	3.25501	5.67754	4.98078	4.55021	NA	4.0781	NA	Low	Low	Low_Low
BRD:BRD-K30577245-001-04-3	ACH-000638	-1.00379	DOCETAXEL	2.5	NCIH441_LUNG	Male	LUNG	Lung	Non-Small Cell Lung Carcinoma	Lung Adenocarcinoma	2	Mutant	4.01195	5.74212	4.27799	4.78157	NA	4.21684	NA	High	High	High_High
BRD:BRD-K30577245-001-04-3	ACH-000643	-3.31455	DOCETAXEL	2.5	HDQP1_BREAST	Female	BREAST	Breast	Breast Carcinoma	NA	2	Mutant	2.84718	3.64157	3.8646	3.10907	NA	4.18591	NA	Low	High	Low_High
BRD:BRD-K30577245-001-04-3	ACH-000644	-1.28684	DOCETAXEL	2.5	NA	Male	NA	Skin	Melanoma	Cutaneous melanoma	0	WT	3.34147	4.87471	4.18438	3.1578	NA	3.5482	NA	Low	Low	Low_Low
BRD:BRD-K30577245-001-04-3	ACH-000645	-2.94411	DOCETAXEL	2.5	JL1_PLEURA	Unknown	PLEURA	NA	NA	NA	0	WT	2.18039	6.54529	4.80099	2.03369	NA	NA	NA	Low	NA	Low_NA
BRD:BRD-K30577245-001-04-3	ACH-000647	-1.92158	DOCETAXEL	2.5	TE1_OESOPHAGUS	Male	OESOPHAGUS	Esophagus	Esophageal Carcinoma	Esophageal Squamous Cell Carcinoma	2	Mutant	3.40249	6.12038	4.26922	4.2394	2.88094	4.08058	NA	High	High	High_High
BRD:BRD-K30577245-001-04-3	ACH-000648	-0.622416	DOCETAXEL	2.5	NCIH28_PLEURA	Male	PLEURA	Lung	Mesothelioma	Pleural Sarcomatoid Mesothelioma	0	WT	6.14531	5.99359	5.00718	2.8527	NA	4.99773	NA	High	High	High_High
BRD:BRD-K30577245-001-04-3	ACH-000649	-2.24064	DOCETAXEL	2.5	786O_KIDNEY	Male	KIDNEY	Kidney	Kidney Carcinoma	NA	1	Mutant	3.26503	3.72692	3.10367	3.6997	NA	3.6032	NA	Low	Low	Low_Low
BRD:BRD-K30577245-001-04-3	ACH-000650	-2.32465	DOCETAXEL	2.5	IGR37_SKIN	Male	SKIN	Skin	Melanoma	NA	0	WT	3.73905	1.43274	4.04276	4.29695	NA	4.53819	NA	High	High	High_High
BRD:BRD-K30577245-001-04-3	ACH-000651	-0.842949	DOCETAXEL	2.5	SW620_LARGE_INTESTINE	Male	LARGE_INTESTINE	Large Intestine	Colorectal Carcinoma	Colon adenocarcinoma	2	Mutant	3.89303	5.89685	4.25563	4.71939	4.91585	3.74619	NA	High	Low	High_Low
BRD:BRD-K30577245-001-04-3	ACH-000657	-2.23313	DOCETAXEL	2.5	A2780_OVARY	Female	OVARY	Ovary	Ovarian Carcinoma	Ovarian endometrioid adenocarcinoma	0	WT	3.13225	5.59103	5.484	4.63919	NA	4.62938	NA	Low	High	Low_High
BRD:BRD-K30577245-001-04-3	ACH-000661	-3.58813	DOCETAXEL	2.5	WM1799_SKIN	Unknown	SKIN	NA	NA	NA	0	WT	3.29329	5.37751	4.78135	3.86034	NA	NA	NA	Low	NA	Low_NA
BRD:BRD-K30577245-001-04-3	ACH-000663	-1.59736	DOCETAXEL	2.5	OVTOKO_OVARY	Female	OVARY	Ovary	Ovarian Carcinoma	Ovarian clear cell adenocarcinoma	0	WT	3.44728	4.78963	2.21066	2.84515	NA	3.07603	NA	High	Low	High_Low
BRD:BRD-K30577245-001-04-3	ACH-000665	-3.36925	DOCETAXEL	2.5	SKMES1_LUNG	Male	LUNG	Lung	Non-Small Cell Lung Carcinoma	Squamous Cell Lung Carcinoma	2	Mutant	3.36565	2.5908	5.61993	4.29918	NA	4.2853	NA	Low	High	Low_High
BRD:BRD-K30577245-001-04-3	ACH-000666	-1.87464	DOCETAXEL	2.5	NCIH1355_LUNG	Male	LUNG	Lung	Non-Small Cell Lung Carcinoma	Lung Adenocarcinoma	2	Mutant	3.90231	5.05788	4.9248	5.30436	NA	4.29982	2.80384	High	High	High_High
BRD:BRD-K30577245-001-04-3	ACH-000667	-1.53235	DOCETAXEL	2.5	HCC44_LUNG	Unknown	LUNG	NA	NA	NA	2	Mutant	2.34383	1.95769	2.6568	2.17975	NA	NA	NA	Low	NA	Low_NA
BRD:BRD-K30577245-001-04-3	ACH-000669	-3.03277	DOCETAXEL	2.5	SW900_LUNG	Unknown	LUNG	NA	NA	NA	2	Mutant	3.61057	3.78765	4.62982	4.24402	NA	NA	NA	High	NA	High_NA
BRD:BRD-K30577245-001-04-3	ACH-000670	-4.31664	DOCETAXEL	2.5	SBC5_LUNG	Male	LUNG	Lung	Small Cell Lung Carcinoma	NA	2	Mutant	3.90324	5.20707	5.04857	4.33514	NA	5.70679	NA	High	High	High_High
BRD:BRD-K30577245-001-04-3	ACH-000671	-0.32334	DOCETAXEL	2.5	HUH6_LIVER	Unknown	LIVER	NA	NA	NA	2	Mutant	3.59355	4.78496	2.48236	4.67865	NA	NA	NA	Low	NA	Low_NA
BRD:BRD-K30577245-001-04-3	ACH-000672	-1.50907	DOCETAXEL	2.5	IALM_LUNG	Male	LUNG	Lung	Non-Small Cell Lung Carcinoma	Lung large cell carcinoma	2	Mutant	3.00002	2.86223	4.777	4.7318	NA	3.6833	NA	Low	Low	Low_Low
BRD:BRD-K30577245-001-04-3	ACH-000674	-2.84501	DOCETAXEL	2.5	NUGC4_STOMACH	Female	STOMACH	Stomach	Gastric Carcinoma	Gastric signet ring cell adenocarcinoma	0	WT	4.71546	5.81376	3.42955	1.98509	NA	2.79869	NA	High	Low	High_Low
BRD:BRD-K30577245-001-04-3	ACH-000677	0.549455	DOCETAXEL	2.5	SW1573_LUNG	Female	LUNG	Lung	Non-Small Cell Lung Carcinoma	Lung Adenocarcinoma	0	WT	4.16904	5.59316	4.3263	5.32291	NA	3.73337	NA	High	Low	High_Low
BRD:BRD-K30577245-001-04-3	ACH-000678	-0.770174	DOCETAXEL	2.5	MKN7_STOMACH	Male	STOMACH	Stomach	Gastric Carcinoma	Gastric tubular adenocarcinoma	2	Mutant	3.31689	6.19031	3.25898	4.74468	2.6668	2.66925	NA	Low	Low	Low_Low
BRD:BRD-K30577245-001-04-3	ACH-000679	0.353122	DOCETAXEL	2.5	OE19_OESOPHAGUS	Male	OESOPHAGUS	Esophagus	Esophageal Carcinoma	Esophageal Adenocarcinoma	0	WT	3.73595	3.49084	3.64743	3.56758	NA	3.9106	NA	High	Low	High_Low
BRD:BRD-K30577245-001-04-3	ACH-000680	0.367636	DOCETAXEL	2.5	SW948_LARGE_INTESTINE	Female	LARGE_INTESTINE	Large Intestine	Colorectal Carcinoma	Colon adenocarcinoma	0	WT	4.10594	3.21212	3.28381	4.48309	NA	3.40469	NA	High	Low	High_Low
BRD:BRD-K30577245-001-04-3	ACH-000681	-0.63262	DOCETAXEL	2.5	A549_LUNG	Male	LUNG	Lung	Non-Small Cell Lung Carcinoma	Lung Adenocarcinoma	0	WT	3.58094	5.07725	3.76321	3.75967	NA	3.17031	NA	High	Low	High_Low
BRD:BRD-K30577245-001-04-3	ACH-000682	-2.4243	DOCETAXEL	2.5	SNU1066_UPPER_AERODIGESTIVE_TRACT	Unknown	UPPER_AERODIGESTIVE_TRACT	NA	NA	NA	0	WT	3.2333	2.98067	3.54404	4.98434	NA	NA	NA	High	NA	High_NA
BRD:BRD-K30577245-001-04-3	ACH-000684	-1.44963	DOCETAXEL	2.5	KMRC1_KIDNEY	Male	KIDNEY	Kidney	Kidney Carcinoma	Clear cell renal cell carcinoma	0	WT	2.10079	3.26589	2.85163	2.47748	NA	3.03455	NA	Low	Low	Low_Low
BRD:BRD-K30577245-001-04-3	ACH-000685	-2.87622	DOCETAXEL	2.5	L33_PANCREAS	Unknown	PANCREAS	NA	NA	NA	0	WT	3.14158	2.81674	4.49442	4.0769	NA	NA	NA	Low	NA	Low_NA
BRD:BRD-K30577245-001-04-3	ACH-000686	-0.684516	DOCETAXEL	2.5	SNU878_LIVER	Unknown	LIVER	NA	NA	NA	2	Mutant	4.27478	4.5613	5.04574	3.48331	NA	NA	NA	High	NA	High_NA
BRD:BRD-K30577245-001-04-3	ACH-000688	-1.37153	DOCETAXEL	2.5	OV7_OVARY	Female	OVARY	Ovary	Ovarian Carcinoma	NA	2	Mutant	2.66379	4.68508	3.83786	3.73852	NA	4.78521	NA	Low	High	Low_High
BRD:BRD-K30577245-001-04-3	ACH-000692	-1.10481	DOCETAXEL	2.5	SNU899_UPPER_AERODIGESTIVE_TRACT	Unknown	UPPER_AERODIGESTIVE_TRACT	NA	NA	NA	2	Mutant	3.63629	5.57484	3.30569	4.92197	NA	NA	NA	High	NA	High_NA
BRD:BRD-K30577245-001-04-3	ACH-000693	-4.75982	DOCETAXEL	2.5	KYSE180_OESOPHAGUS	Male	OESOPHAGUS	Esophagus	Esophageal Carcinoma	Esophageal Squamous Cell Carcinoma	2	Mutant	3.37627	5.68355	4.37058	3.94932	3.2854	4.13679	NA	Low	High	Low_High
BRD:BRD-K30577245-001-04-3	ACH-000694	-1.57947	DOCETAXEL	2.5	TE9_OESOPHAGUS	Male	OESOPHAGUS	Esophagus	Esophageal Carcinoma	Esophageal Squamous Cell Carcinoma	0	WT	3.44097	4.11049	4.64097	3.3249	NA	3.61823	NA	High	Low	High_Low
BRD:BRD-K30577245-001-04-3	ACH-000696	-3.95111	DOCETAXEL	2.5	OVCAR8_OVARY	Female	OVARY	Ovary	Ovarian Carcinoma	High grade ovarian serous adenocarcinoma	0	WT	3.19491	5.72164	4.25085	3.94652	NA	3.25124	NA	Low	Low	Low_Low
BRD:BRD-K30577245-001-04-3	ACH-000699	-0.808438	DOCETAXEL	2.5	HCC1395_BREAST	Female	BREAST	Breast	Breast Carcinoma	Ductal Breast Carcinoma	2	Mutant	2.37026	7.05369	4.75802	3.59819	3.82305	4.86137	NA	Low	High	Low_High
BRD:BRD-K30577245-001-04-3	ACH-000701	-2.03182	DOCETAXEL	2.5	RMUGS_OVARY	Female	OVARY	NA	NA	NA	0	WT	2.95845	6.09669	3.43308	4.33586	NA	NA	NA	Low	NA	Low_NA
BRD:BRD-K30577245-001-04-3	ACH-000704	-1.04778	DOCETAXEL	2.5	OAW42_OVARY	Female	OVARY	Ovary	Ovarian Carcinoma	Ovarian Cystadenocarcinoma	0	WT	4.24135	5.39838	4.1096	3.81133	NA	4.66509	NA	High	High	High_High
BRD:BRD-K30577245-001-04-3	ACH-000706	-2.37334	DOCETAXEL	2.5	EKVX_LUNG	Male	LUNG	Lung	Non-Small Cell Lung Carcinoma	Lung adenocarcinoma	0	WT	4.1543	2.66499	5.17939	3.78054	NA	5.4737	NA	High	High	High_High
BRD:BRD-K30577245-001-04-3	ACH-000711	-1.90412	DOCETAXEL	2.5	JIMT1_BREAST	Female	BREAST	Breast	Breast Carcinoma	Ductal Breast Carcinoma	2	Mutant	2.86974	6.60435	3.83336	4.40811	4.38967	3.85532	NA	Low	Low	Low_Low
BRD:BRD-K30577245-001-04-3	ACH-000713	-0.8002	DOCETAXEL	2.5	CAOV3_OVARY	Female	OVARY	Ovary	Ovarian Carcinoma	High grade ovarian serous adenocarcinoma	2	Mutant	4.31308	1.72996	4.56891	4.2775	NA	4.21818	NA	High	High	High_High
BRD:BRD-K30577245-001-04-3	ACH-000715	-1.77264	DOCETAXEL	2.5	SNU1214_UPPER_AERODIGESTIVE_TRACT	Unknown	UPPER_AERODIGESTIVE_TRACT	NA	NA	NA	2	Mutant	3.61957	4.97596	3.97202	4.16513	NA	NA	NA	High	NA	High_NA
BRD:BRD-K30577245-001-04-3	ACH-000716	-1.65591	DOCETAXEL	2.5	TT2609C02_THYROID	Male	THYROID	Thyroid	Thyroid Gland Carcinoma	Thyroid gland follicular carcinoma	2	Mutant	3.28346	5.28505	4.50718	4.89084	4.19185	3.69507	NA	High	Low	High_Low
BRD:BRD-K30577245-001-04-3	ACH-000717	-1.58969	DOCETAXEL	2.5	COLO680N_OESOPHAGUS	Female	OESOPHAGUS	Esophagus	Esophageal Carcinoma	Esophageal Squamous Cell Carcinoma	2	Mutant	3.31551	7.14298	4.60726	5.17005	4.88695	3.41314	NA	Low	Low	Low_Low
BRD:BRD-K30577245-001-04-3	ACH-000719	-0.862357	DOCETAXEL	2.5	RMGI_OVARY	Female	OVARY	Ovary	Ovarian Carcinoma	Ovarian clear cell adenocarcinoma	0	WT	2.69354	3.27443	3.25502	2.38104	NA	2.87858	NA	Low	Low	Low_Low
BRD:BRD-K30577245-001-04-3	ACH-000720	-2.43869	DOCETAXEL	2.5	TCCSUP_URINARY_TRACT	Female	URINARY_TRACT	Bladder	Bladder Carcinoma	NA	2	Mutant	3.2157	5.09003	4.84278	3.91927	NA	5.13197	NA	Low	High	Low_High
BRD:BRD-K30577245-001-04-3	ACH-000721	-1.87197	DOCETAXEL	2.5	HMC18_BREAST	Female	BREAST	NA	NA	NA	0	WT	3.02206	2.77774	3.58072	4.15295	NA	NA	NA	Low	NA	Low_NA
BRD:BRD-K30577245-001-04-3	ACH-000723	-4.29796	DOCETAXEL	2.5	YD10B_UPPER_AERODIGESTIVE_TRACT	Unknown	UPPER_AERODIGESTIVE_TRACT	NA	NA	NA	0	WT	3.20979	3.06946	4.21412	3.71923	NA	NA	NA	High	NA	High_NA
BRD:BRD-K30577245-001-04-3	ACH-000724	-0.283117	DOCETAXEL	2.5	HT1376_URINARY_TRACT	Female	URINARY_TRACT	Bladder	Bladder Carcinoma	NA	2	Mutant	3.94966	6.58361	4.39505	4.67806	1.29136	4.26346	NA	High	High	High_High
BRD:BRD-K30577245-001-04-3	ACH-000726	-2.01701	DOCETAXEL	2.5	TE14_OESOPHAGUS	Unknown	OESOPHAGUS	NA	NA	NA	2	Mutant	3.70241	3.57334	3.98758	4.72899	NA	NA	NA	High	NA	High_NA
BRD:BRD-K30577245-001-04-3	ACH-000730	-1.88375	DOCETAXEL	2.5	SKMEL5_SKIN	Female	SKIN	Skin	Melanoma	Cutaneous melanoma	0	WT	3.36698	3.92999	4.25972	3.71166	NA	3.31873	NA	Low	Low	Low_Low
BRD:BRD-K30577245-001-04-3	ACH-000733	-0.0241617	DOCETAXEL	2.5	NCIH1838_LUNG	Female	LUNG	Lung	Non-Small Cell Lung Carcinoma	Lung Adenocarcinoma	2	Mutant	3.91338	6.05241	4.35149	4.08544	4.37394	3.57244	NA	High	Low	High_Low
BRD:BRD-K30577245-001-04-3	ACH-000734	-1.74969	DOCETAXEL	2.5	JHH5_LIVER	Unknown	LIVER	NA	NA	NA	0	WT	3.67351	5.68897	3.56357	3.60864	NA	NA	NA	High	NA	High_NA
BRD:BRD-K30577245-001-04-3	ACH-000735	-3.49403	DOCETAXEL	2.5	PECAPJ49_UPPER_AERODIGESTIVE_TRACT	Unknown	UPPER_AERODIGESTIVE_TRACT	NA	NA	NA	0	WT	2.43183	0.395719	4.03962	3.49457	NA	NA	NA	Low	NA	Low_NA
BRD:BRD-K30577245-001-04-3	ACH-000736	-4.82363	DOCETAXEL	2.5	SNU601_STOMACH	Unknown	STOMACH	NA	NA	NA	2	Mutant	3.33196	6.51585	3.95713	4.36886	NA	NA	NA	Low	NA	Low_NA
BRD:BRD-K30577245-001-04-3	ACH-000738	-0.981657	DOCETAXEL	2.5	GB1_CENTRAL_NERVOUS_SYSTEM	Male	CENTRAL_NERVOUS_SYSTEM	Central Nervous System	Glioblastoma	NA	0	WT	3.54482	7.34234	4.60618	4.36744	4.1787	3.61688	NA	High	Low	High_Low
BRD:BRD-K30577245-001-04-3	ACH-000739	-1.65415	DOCETAXEL	2.5	HEPG2_LIVER	Unknown	LIVER	NA	NA	NA	0	WT	3.7748	4.8752	2.50204	3.57706	NA	NA	NA	High	NA	High_NA
BRD:BRD-K30577245-001-04-3	ACH-000740	-0.831073	DOCETAXEL	2.5	A253_SALIVARY_GLAND	Male	SALIVARY_GLAND	Head and Neck	Head and Neck Carcinoma	Salivary gland squamous cell carcinoma	0	WT	3.42185	3.02488	3.70741	4.0614	NA	3.22208	NA	High	Low	High_Low
BRD:BRD-K30577245-001-04-3	ACH-000741	-2.7746	DOCETAXEL	2.5	UBLC1_URINARY_TRACT	Unknown	URINARY_TRACT	NA	NA	NA	2	Mutant	4.34287	3.72902	2.43541	4.18763	NA	NA	NA	High	NA	High_NA
BRD:BRD-K30577245-001-04-3	ACH-000744	2.1369	DOCETAXEL	2.5	NCIH1623_LUNG	Male	LUNG	Lung	Non-Small Cell Lung Carcinoma	Lung Adenocarcinoma	2	Mutant	3.69391	4.74868	4.36106	4.80908	NA	3.76787	NA	High	Low	High_Low
BRD:BRD-K30577245-001-04-3	ACH-000747	-5.00478	DOCETAXEL	2.5	NCIH1703_LUNG	Male	LUNG	Lung	Non-Small Cell Lung Carcinoma	Squamous Cell Lung Carcinoma	0	WT	2.77535	4.25988	5.38015	3.92022	NA	4.55518	NA	Low	High	Low_High
BRD:BRD-K30577245-001-04-3	ACH-000748	-1.06625	DOCETAXEL	2.5	SJSA1_BONE	Male	BONE	Bone	Osteosarcoma	NA	0	WT	4.28765	5.89188	4.59804	2.84136	NA	3.68404	NA	High	Low	High_Low
BRD:BRD-K30577245-001-04-3	ACH-000749	-3.16016	DOCETAXEL	2.5	DMS273_LUNG	Female	LUNG	Lung	Small Cell Lung Carcinoma	NA	2	Mutant	4.05595	5.30135	3.35473	3.7095	2.13165	3.09509	NA	High	Low	High_Low
BRD:BRD-K30577245-001-04-3	ACH-000753	-1.66676	DOCETAXEL	2.5	JMSU1_URINARY_TRACT	Unknown	URINARY_TRACT	NA	NA	NA	1	Mutant	2.98457	6.20936	5.3589	3.78054	NA	NA	NA	Low	NA	Low_NA
BRD:BRD-K30577245-001-04-3	ACH-000756	-2.97375	DOCETAXEL	2.5	GI1_CENTRAL_NERVOUS_SYSTEM	Male	CENTRAL_NERVOUS_SYSTEM	Central Nervous System	Glioblastoma	NA	2	Mutant	2.89564	5.82525	6.20397	3.73958	2.46095	4.9769	NA	Low	High	Low_High
BRD:BRD-K30577245-001-04-3	ACH-000758	-0.336763	DOCETAXEL	2.5	MKN74_STOMACH	Unknown	STOMACH	NA	NA	NA	2	Mutant	4.58057	7.29223	6.03484	5.33057	NA	NA	NA	High	NA	High_NA
BRD:BRD-K30577245-001-04-3	ACH-000759	0.235133	DOCETAXEL	2.5	MDAMB175VII_BREAST	Female	BREAST	Breast	Breast Carcinoma	Invasive Ductal Carcinoma of No Special Type	0	WT	3.09108	3.89565	4.35469	2.34751	NA	4.19664	NA	Low	High	Low_High
BRD:BRD-K30577245-001-04-3	ACH-000762	-3.29072	DOCETAXEL	2.5	YD38_UPPER_AERODIGESTIVE_TRACT	Unknown	UPPER_AERODIGESTIVE_TRACT	NA	NA	NA	2	Mutant	3.03045	2.83966	2.97734	3.90403	NA	NA	NA	Low	NA	Low_NA
BRD:BRD-K30577245-001-04-3	ACH-000764	-3.66975	DOCETAXEL	2.5	SH10TC_STOMACH	Unknown	STOMACH	NA	NA	NA	2	Mutant	3.03379	5.14704	4.66146	3.7095	NA	NA	NA	Low	NA	Low_NA
BRD:BRD-K30577245-001-04-3	ACH-000765	-1.50565	DOCETAXEL	2.5	WM983B_SKIN	Unknown	SKIN	NA	NA	NA	2	Mutant	3.94338	6.12187	4.82508	3.04384	NA	NA	NA	High	NA	High_NA
BRD:BRD-K30577245-001-04-3	ACH-000766	-3.2067	DOCETAXEL	2.5	NCIH1648_LUNG	Male	LUNG	Lung	Non-Small Cell Lung Carcinoma	Lung Adenocarcinoma	0	WT	2.82234	4.5625	4.93747	4.48638	NA	5.4241	1.92442	Low	High	Low_High
BRD:BRD-K30577245-001-04-3	ACH-000768	-1.53603	DOCETAXEL	2.5	MDAMB231_BREAST	Female	BREAST	Breast	Breast Carcinoma	Breast adenocarcinoma	2	Mutant	3.60038	5.46329	3.17219	4.24709	5.16195	3.12457	NA	High	Low	High_Low
BRD:BRD-K30577245-001-04-3	ACH-000769	-3.83507	DOCETAXEL	2.5	LK2_LUNG	Male	LUNG	Lung	Non-Small Cell Lung Carcinoma	Squamous Cell Lung Carcinoma	2	Mutant	4.76212	5.87562	4.09601	5.93551	2.22237	4.04963	NA	High	High	High_High
BRD:BRD-K30577245-001-04-3	ACH-000771	-1.06496	DOCETAXEL	2.5	BICR56_UPPER_AERODIGESTIVE_TRACT	Unknown	UPPER_AERODIGESTIVE_TRACT	NA	NA	NA	0	WT	1.36541	4.64513	3.23774	2.28093	NA	NA	NA	Low	NA	Low_NA
BRD:BRD-K30577245-001-04-3	ACH-000774	-0.581196	DOCETAXEL	2.5	RERFLCAD2_LUNG	Unknown	LUNG	NA	NA	NA	2	Mutant	2.6158	5.25267	3.67871	3.37279	NA	NA	NA	Low	NA	Low_NA
BRD:BRD-K30577245-001-04-3	ACH-000775	-0.622344	DOCETAXEL	2.5	NCIH727_LUNG	Female	LUNG	Lung	Carcinoid Tumour	Lung Carcinoid Tumor	0	WT	4.17827	5.55909	3.95962	4.77229	2.38155	2.95176	NA	High	Low	High_Low
BRD:BRD-K30577245-001-04-3	ACH-000776	-0.833871	DOCETAXEL	2.5	ONS76_CENTRAL_NERVOUS_SYSTEM	Female	CENTRAL_NERVOUS_SYSTEM	Central Nervous System	Other Solid Carcinomas	Medulloblastoma	0	WT	3.1979	5.03121	4.40992	2.10844	NA	2.94707	NA	Low	Low	Low_Low
BRD:BRD-K30577245-001-04-3	ACH-000777	-2.10047	DOCETAXEL	2.5	KYSE30_OESOPHAGUS	Unknown	OESOPHAGUS	NA	NA	NA	1	Mutant	3.20831	4.27891	4.32564	4.24402	NA	NA	NA	Low	NA	Low_NA
BRD:BRD-K30577245-001-04-3	ACH-000778	-2.24365	DOCETAXEL	2.5	HSC3_UPPER_AERODIGESTIVE_TRACT	Male	UPPER_AERODIGESTIVE_TRACT	Head and Neck	Head and Neck Carcinoma	Tongue Squamous Cell Carcinoma	0	WT	3.18289	2.14341	3.41655	3.73212	NA	3.39282	NA	High	Low	High_Low
BRD:BRD-K30577245-001-04-3	ACH-000781	-0.953435	DOCETAXEL	2.5	NCIH2023_LUNG	Male	LUNG	Lung	Non-Small Cell Lung Carcinoma	Squamous Cell Lung Carcinoma	0	WT	3.06517	4.39642	4.76486	3.84947	NA	3.13285	NA	Low	Low	Low_Low
BRD:BRD-K30577245-001-04-3	ACH-000783	-0.129055	DOCETAXEL	2.5	CAMA1_BREAST	Female	BREAST	Breast	Breast Carcinoma	Breast adenocarcinoma	2	Mutant	3.78586	5.43254	5.33734	3.78778	NA	5.10317	NA	High	High	High_High
BRD:BRD-K30577245-001-04-3	ACH-000784	-0.363763	DOCETAXEL	2.5	KYSE70_OESOPHAGUS	Male	OESOPHAGUS	Esophagus	Esophageal Carcinoma	Esophageal Squamous Cell Carcinoma	1	Mutant	3.31964	4.82798	4.25222	5.21475	3.41138	4.35543	1.43501	Low	High	Low_High
BRD:BRD-K30577245-001-04-3	ACH-000785	-2.92895	DOCETAXEL	2.5	NCIH2126_LUNG	Unknown	LUNG	NA	NA	NA	2	Mutant	4.10836	3.28151	4.54768	4.98482	NA	NA	NA	High	NA	High_NA
BRD:BRD-K30577245-001-04-3	ACH-000787	0.6753	DOCETAXEL	2.5	LXF289_LUNG	Male	LUNG	Lung	Non-Small Cell Lung Carcinoma	Lung Adenocarcinoma	2	Mutant	3.59241	6.43694	4.14525	4.92644	3.98107	3.83162	NA	High	Low	High_Low
BRD:BRD-K30577245-001-04-3	ACH-000788	-4.71722	DOCETAXEL	2.5	A2058_SKIN	Male	SKIN	Skin	Melanoma	Cutaneous melanoma	2	Mutant	3.52582	5.86553	4.25495	4.3844	NA	3.9744	NA	High	High	High_High
BRD:BRD-K30577245-001-04-3	ACH-000791	0.730054	DOCETAXEL	2.5	RERFLCAD1_LUNG	Unknown	LUNG	NA	NA	NA	2	Mutant	4.35721	6.06332	5.05663	4.79835	NA	NA	NA	High	NA	High_NA
BRD:BRD-K30577245-001-04-3	ACH-000792	-0.0108649	DOCETAXEL	2.5	BFTC909_KIDNEY	Male	KIDNEY	Kidney	Kidney Carcinoma	Renal pelvis and ureter urothelial carcinoma	2	Mutant	3.01869	4.69062	4.81662	3.26251	3.47011	4.27258	NA	Low	High	Low_High
BRD:BRD-K30577245-001-04-3	ACH-000794	-1.72705	DOCETAXEL	2.5	BICR22_UPPER_AERODIGESTIVE_TRACT	Male	UPPER_AERODIGESTIVE_TRACT	Head and Neck	Head and Neck Carcinoma	Tongue Squamous Cell Carcinoma	0	WT	2.00996	2.42546	2.33935	1.93491	NA	3.79648	NA	Low	Low	Low_Low
BRD:BRD-K30577245-001-04-3	ACH-000796	-2.84225	DOCETAXEL	2.5	MCAS_OVARY	Female	OVARY	NA	NA	NA	0	WT	3.27356	6.22479	4.08	4.54704	NA	NA	NA	High	NA	High_NA
BRD:BRD-K30577245-001-04-3	ACH-000800	-1.24198	DOCETAXEL	2.5	NCIH446_LUNG	Male	LUNG	Lung	Small Cell Lung Carcinoma	NA	2	Mutant	4.31237	5.88565	4.29004	4.82451	2.23232	3.90463	0.79667	High	Low	High_Low
BRD:BRD-K30577245-001-04-3	ACH-000802	-1.44842	DOCETAXEL	2.5	BFTC905_URINARY_TRACT	Female	URINARY_TRACT	Bladder	Bladder Carcinoma	Urothelial carcinoma	0	WT	3.78084	3.07595	3.61756	4.34237	NA	3.84949	NA	High	Low	High_Low
BRD:BRD-K30577245-001-04-3	ACH-000803	-1.85069	DOCETAXEL	2.5	COLO668_LUNG	Female	LUNG	Lung	Small Cell Lung Carcinoma	NA	1	Mutant	5.11876	5.14785	4.54542	3.9002	1.72051	3.65473	NA	High	Low	High_Low
BRD:BRD-K30577245-001-04-3	ACH-000804	-3.50256	DOCETAXEL	2.5	NB1_AUTONOMIC_GANGLIA	Male	AUTONOMIC_GANGLIA	Peripheral Nervous System	Neuroblastoma	NA	0	WT	3.89023	5.69579	4.84971	3.28406	NA	5.26113	NA	High	High	High_High
BRD:BRD-K30577245-001-04-3	ACH-000805	-2.73016	DOCETAXEL	2.5	COLO679_SKIN	Female	SKIN	Skin	Melanoma	Cutaneous melanoma	0	WT	3.39989	4.00341	3.70839	3.87504	NA	2.45261	NA	High	Low	High_Low
BRD:BRD-K30577245-001-04-3	ACH-000808	-0.772969	DOCETAXEL	2.5	HUH28_BILIARY_TRACT	Unknown	BILIARY_TRACT	NA	NA	NA	2	Mutant	3.1524	5.81035	4.07617	3.44777	NA	NA	NA	Low	NA	Low_NA
BRD:BRD-K30577245-001-04-3	ACH-000809	-4.20675	DOCETAXEL	2.5	KYSE410_OESOPHAGUS	Male	OESOPHAGUS	Esophagus	Esophageal Carcinoma	Esophageal Squamous Cell Carcinoma	2	Mutant	3.16772	4.40514	4.50371	3.92117	NA	3.9325	NA	Low	Low	Low_Low
BRD:BRD-K30577245-001-04-3	ACH-000810	-0.355339	DOCETAXEL	2.5	SKMEL30_SKIN	Male	SKIN	Skin	Melanoma	Cutaneous melanoma	1	Mutant	3.2333	3.98937	3.14686	2.86583	NA	2.90575	NA	Low	Low	Low_Low
BRD:BRD-K30577245-001-04-3	ACH-000811	-1.51276	DOCETAXEL	2.5	SKOV3_OVARY	Female	OVARY	Ovary	Ovarian Carcinoma	Ovarian Cystadenocarcinoma	0	WT	4.12834	1.81852	5.79165	4.68387	NA	4.16043	NA	High	High	High_High
BRD:BRD-K30577245-001-04-3	ACH-000812	-2.72463	DOCETAXEL	2.5	COLO783_SKIN	Female	SKIN	Skin	Melanoma	NA	0	WT	4.00074	5.61485	4.83721	4.64811	NA	5.14326	NA	High	High	High_High
BRD:BRD-K30577245-001-04-3	ACH-000813	-1.76185	DOCETAXEL	2.5	T3M10_LUNG	Unknown	LUNG	NA	NA	NA	2	Mutant	3.44728	4.92429	4.11934	4.65816	NA	NA	NA	Low	NA	Low_NA
BRD:BRD-K30577245-001-04-3	ACH-000814	-1.26749	DOCETAXEL	2.5	HS939T_SKIN	Female	SKIN	Skin	Melanoma	NA	0	WT	3.48462	4.51538	3.84414	3.85046	NA	3.07229	NA	High	Low	High_Low
BRD:BRD-K30577245-001-04-3	ACH-000819	-3.59764	DOCETAXEL	2.5	LN18_CENTRAL_NERVOUS_SYSTEM	Male	CENTRAL_NERVOUS_SYSTEM	Central Nervous System	Glioblastoma	NA	2	Mutant	3.91704	5.6921	5.08412	4.78701	NA	4.08073	NA	High	Low	High_Low
BRD:BRD-K30577245-001-04-3	ACH-000822	-1.41957	DOCETAXEL	2.5	SKMEL24_SKIN	Male	SKIN	Skin	Melanoma	NA	0	WT	3.10069	5.10186	4.24123	3.04883	NA	3.39519	NA	Low	Low	Low_Low
BRD:BRD-K30577245-001-04-3	ACH-000823	-0.458084	DOCETAXEL	2.5	KYSE140_OESOPHAGUS	Male	OESOPHAGUS	Esophagus	Esophageal Carcinoma	Esophageal Squamous Cell Carcinoma	2	Mutant	3.07494	6.27998	4.53978	3.66882	4.05443	4.43463	NA	Low	High	Low_High
BRD:BRD-K30577245-001-04-3	ACH-000824	-3.7995	DOCETAXEL	2.5	KYSE510_OESOPHAGUS	Female	OESOPHAGUS	Esophagus	Esophageal Carcinoma	Esophageal Squamous Cell Carcinoma	1	Mutant	3.59811	3.9734	4.23433	4.18204	NA	3.91382	0.77211	High	Low	High_Low
BRD:BRD-K30577245-001-04-3	ACH-000826	-0.118739	DOCETAXEL	2.5	CAL12T_LUNG	Male	LUNG	Lung	Non-Small Cell Lung Carcinoma	NA	2	Mutant	3.23038	6.47927	4.9182	4.63501	3.71181	4.68146	2.80573	Low	High	Low_High
BRD:BRD-K30577245-001-04-3	ACH-000827	-2.1988	DOCETAXEL	2.5	WM793_SKIN	Male	SKIN	Skin	Melanoma	NA	0	WT	2.49092	4.94359	4.33927	3.89539	NA	3.57036	NA	Low	Low	Low_Low
BRD:BRD-K30577245-001-04-3	ACH-000832	-3.63521	DOCETAXEL	2.5	CAL27_UPPER_AERODIGESTIVE_TRACT	Male	UPPER_AERODIGESTIVE_TRACT	Head and Neck	Head and Neck Carcinoma	Tongue Squamous Cell Carcinoma	2	Mutant	3.04874	6.13251	3.96872	3.32212	3.39928	4.16388	NA	Low	High	Low_High
BRD:BRD-K30577245-001-04-3	ACH-000833	-0.815778	DOCETAXEL	2.5	RH30_SOFT_TISSUE	Unknown	SOFT_TISSUE	NA	NA	NA	2	Mutant	3.4435	5.40355	3.50982	4.5305	NA	NA	NA	Low	NA	Low_NA
BRD:BRD-K30577245-001-04-3	ACH-000834	-3.74014	DOCETAXEL	2.5	UMUC1_URINARY_TRACT	Unknown	URINARY_TRACT	NA	NA	NA	2	Mutant	3.26074	5.88864	3.55275	3.28121	NA	NA	NA	Low	NA	Low_NA
BRD:BRD-K30577245-001-04-3	ACH-000835	-3.01728	DOCETAXEL	2.5	GCT_SOFT_TISSUE	Male	SOFT_TISSUE	Soft Tissue	Other Sarcomas	Undifferentiated pleomorphic sarcoma	1	Mutant	3.20831	5.18852	5.04695	4.20271	NA	3.79399	NA	Low	Low	Low_Low
BRD:BRD-K30577245-001-04-3	ACH-000836	-2.77852	DOCETAXEL	2.5	YD15_SALIVARY_GLAND	Unknown	SALIVARY_GLAND	NA	NA	NA	2	Mutant	3.27922	5.42441	4.19151	3.65764	NA	NA	NA	Low	NA	Low_NA
BRD:BRD-K30577245-001-04-3	ACH-000839	-2.85026	DOCETAXEL	2.5	SCABER_URINARY_TRACT	Unknown	URINARY_TRACT	NA	NA	NA	2	Mutant	1.91673	4.43363	3.27079	2.86956	NA	NA	NA	Low	NA	Low_NA
BRD:BRD-K30577245-001-04-3	ACH-000840	-2.35849	DOCETAXEL	2.5	NA	Female	NA	Lung	Non-Small Cell Lung Carcinoma	Adenosquamous lung carcinoma	2	Mutant	3.39467	5.93238	3.92011	5.50399	NA	3.3647	1.69244	High	Low	High_Low
BRD:BRD-K30577245-001-04-3	ACH-000841	-3.64459	DOCETAXEL	2.5	NCIH2087_LUNG	Male	LUNG	Lung	Non-Small Cell Lung Carcinoma	Lung Adenocarcinoma	2	Mutant	3.77581	7.06502	4.93572	4.42052	3.54532	3.91139	NA	High	Low	High_Low
BRD:BRD-K30577245-001-04-3	ACH-000842	0.156408	DOCETAXEL	2.5	SW480_LARGE_INTESTINE	Unknown	LARGE_INTESTINE	NA	NA	NA	2	Mutant	2.9066	5.26932	2.60897	3.53272	NA	NA	NA	Low	NA	Low_NA
BRD:BRD-K30577245-001-04-3	ACH-000843	-1.96302	DOCETAXEL	2.5	HARA_LUNG	Male	LUNG	Lung	Non-Small Cell Lung Carcinoma	Squamous Cell Lung Carcinoma	2	Mutant	3.44728	5.638	4.63407	4.43894	NA	4.6809	NA	Low	High	Low_High
BRD:BRD-K30577245-001-04-3	ACH-000845	-1.75346	DOCETAXEL	2.5	NCIH1373_LUNG	Unknown	LUNG	NA	NA	NA	2	Mutant	2.89564	2.85287	4.65099	2.88623	NA	NA	NA	Low	NA	Low_NA
BRD:BRD-K30577245-001-04-3	ACH-000846	-1.52701	DOCETAXEL	2.5	FADU_UPPER_AERODIGESTIVE_TRACT	Male	UPPER_AERODIGESTIVE_TRACT	Head and Neck	Head and Neck Carcinoma	Hypopharyngeal squamous cell carcinoma	1	Mutant	3.65283	5.10899	5.47823	3.96136	3.11668	4.02413	NA	High	High	High_High
BRD:BRD-K30577245-001-04-3	ACH-000847	-2.29408	DOCETAXEL	2.5	HGC27_STOMACH	Unknown	STOMACH	Stomach	Gastric Carcinoma	NA	0	WT	3.69497	2.18207	4.20921	3.81133	NA	3.58014	NA	Low	High	Low_High
BRD:BRD-K30577245-001-04-3	ACH-000848	-2.03916	DOCETAXEL	2.5	JHH7_LIVER	Male	LIVER	Liver	Hepatocellular Carcinoma	NA	2	Mutant	4.55287	5.27833	4.2699	4.61212	NA	3.53453	NA	High	Low	High_Low
BRD:BRD-K30577245-001-04-3	ACH-000849	-0.398205	DOCETAXEL	2.5	MDAMB468_BREAST	Female	BREAST	Breast	Breast Carcinoma	Breast adenocarcinoma	2	Mutant	3.8921	6.53948	3.915	4.96125	4.11236	3.31671	NA	High	Low	High_Low
BRD:BRD-K30577245-001-04-3	ACH-000852	-0.899904	DOCETAXEL	2.5	NCIH1435_LUNG	Female	LUNG	Lung	Non-Small Cell Lung Carcinoma	Lung adenocarcinoma	2	Mutant	3.96038	4.64912	4.33862	3.06534	NA	3.14607	NA	High	Low	High_Low
BRD:BRD-K30577245-001-04-3	ACH-000853	-1.0892	DOCETAXEL	2.5	NCIH661_LUNG	Male	LUNG	Lung	Non-Small Cell Lung Carcinoma	Lung large cell carcinoma	2	Mutant	3.43843	5.45466	5.08334	4.914	NA	4.55711	NA	Low	High	Low_High
BRD:BRD-K30577245-001-04-3	ACH-000855	-1.85138	DOCETAXEL	2.5	KYSE150_OESOPHAGUS	Female	OESOPHAGUS	Esophagus	Esophageal Carcinoma	Esophageal Squamous Cell Carcinoma	1	Mutant	4.06675	6.00771	4.44042	5.31714	3.74264	3.92524	-0.18587	High	Low	High_Low
BRD:BRD-K30577245-001-04-3	ACH-000856	-1.62536	DOCETAXEL	2.5	CAL51_BREAST	Female	BREAST	Breast	Breast Carcinoma	NA	0	WT	4.16595	6.34006	5.33867	5.33401	NA	3.39934	NA	High	Low	High_Low
BRD:BRD-K30577245-001-04-3	ACH-000858	-1.97709	DOCETAXEL	2.5	KNS62_LUNG	Male	LUNG	Lung	Non-Small Cell Lung Carcinoma	Squamous Cell Lung Carcinoma	2	Mutant	2.17741	5.02901	3.53967	3.77223	2.66006	3.78524	1.65068	Low	Low	Low_Low
BRD:BRD-K30577245-001-04-3	ACH-000859	-4.84402	DOCETAXEL	2.5	HCC1954_BREAST	Female	BREAST	Breast	Breast Carcinoma	Ductal Breast Carcinoma	2	Mutant	3.1662	6.61007	4.55833	4.86062	3.08361	3.94411	NA	Low	High	Low_High
BRD:BRD-K30577245-001-04-3	ACH-000863	-2.35518	DOCETAXEL	2.5	DBTRG05MG_CENTRAL_NERVOUS_SYSTEM	Female	CENTRAL_NERVOUS_SYSTEM	Central Nervous System	Glioblastoma	NA	0	WT	3.00173	4.71204	4.47683	4.28576	NA	4.3224	NA	Low	High	Low_High
BRD:BRD-K30577245-001-04-3	ACH-000866	-3.16307	DOCETAXEL	2.5	NCIH1048_LUNG	Female	LUNG	Lung	Small Cell Lung Carcinoma	NA	1	Mutant	5.22726	5.65383	5.54171	5.47082	2.5666	5.05732	NA	High	High	High_High
BRD:BRD-K30577245-001-04-3	ACH-000868	-1.48192	DOCETAXEL	2.5	HCC1195_LUNG	Unknown	LUNG	NA	NA	NA	0	WT	4.22954	5.64652	4.24879	4.95979	NA	NA	NA	High	NA	High_NA
BRD:BRD-K30577245-001-04-3	ACH-000869	-2.8632	DOCETAXEL	2.5	NCIH1568_LUNG	Female	LUNG	Lung	Non-Small Cell Lung Carcinoma	Lung Adenocarcinoma	2	Mutant	3.97718	4.9224	4.22182	5.77526	NA	3.63799	NA	High	Low	High_Low
BRD:BRD-K30577245-001-04-3	ACH-000873	-3.6844	DOCETAXEL	2.5	KYSE270_OESOPHAGUS	Male	OESOPHAGUS	Esophagus	Esophageal Carcinoma	Esophageal Squamous Cell Carcinoma	0	WT	3.13069	3.0432	3.4366	4.26237	NA	4.38365	0.17048	Low	High	Low_High
BRD:BRD-K30577245-001-04-3	ACH-000875	-0.74546	DOCETAXEL	2.5	NCIH2347_LUNG	Female	LUNG	Lung	Non-Small Cell Lung Carcinoma	Lung Adenocarcinoma	2	Mutant	2.53374	2.79737	2.89749	2.99821	NA	2.99349	NA	Low	Low	Low_Low
BRD:BRD-K30577245-001-04-3	ACH-000878	-3.22394	DOCETAXEL	2.5	HCC15_LUNG	Male	LUNG	Lung	Non-Small Cell Lung Carcinoma	Squamous Cell Lung Carcinoma	2	Mutant	4.3808	5.34529	4.20639	6.0777	4.13417	3.43381	NA	High	Low	High_Low
BRD:BRD-K30577245-001-04-3	ACH-000879	-1.64074	DOCETAXEL	2.5	MFE296_ENDOMETRIUM	Female	ENDOMETRIUM	Endometrium	Endometrial Carcinoma	Endometrial adenocarcinoma	2	Mutant	3.71508	5.00227	5.39855	4.80158	NA	4.74884	NA	High	Low	High_Low
BRD:BRD-K30577245-001-04-3	ACH-000880	-0.789921	DOCETAXEL	2.5	AGS_STOMACH	Female	STOMACH	Stomach	Gastric Carcinoma	Gastric adenocarcinoma	0	WT	3.40379	5.28431	4.88659	4.75744	NA	4.08573	NA	Low	High	Low_High
BRD:BRD-K30577245-001-04-3	ACH-000881	-2.7501	DOCETAXEL	2.5	MELJUSO_SKIN	Female	SKIN	Skin	Melanoma	Cutaneous melanoma	0	WT	3.19191	5.39042	3.79222	3.54121	NA	3.3179	NA	Low	Low	Low_Low
BRD:BRD-K30577245-001-04-3	ACH-000882	-1.55689	DOCETAXEL	2.5	IGR1_SKIN	Male	SKIN	Skin	Melanoma	NA	0	WT	3.54718	3.24577	4.64625	3.59235	NA	4.01697	NA	High	High	High_High
BRD:BRD-K30577245-001-04-3	ACH-000883	-3.36984	DOCETAXEL	2.5	SW1783_CENTRAL_NERVOUS_SYSTEM	Male	CENTRAL_NERVOUS_SYSTEM	Central Nervous System	Glioma	Low Grade Glioma	2	Mutant	3.07332	5.638	4.66303	3.99693	4.88772	3.67577	NA	Low	Low	Low_Low
BRD:BRD-K30577245-001-04-3	ACH-000884	-3.13124	DOCETAXEL	2.5	MDAMB435S_SKIN	Unknown	SKIN	NA	NA	NA	1	Mutant	3.74627	6.19153	4.29071	4.52409	NA	NA	NA	High	NA	High_NA
BRD:BRD-K30577245-001-04-3	ACH-000885	-2.53896	DOCETAXEL	2.5	TOV21G_OVARY	Female	OVARY	Ovary	Ovarian Carcinoma	Ovarian clear cell adenocarcinoma	0	WT	3.51863	5.48757	4.89512	4.64395	NA	5.06559	NA	High	High	High_High
BRD:BRD-K30577245-001-04-3	ACH-000886	-2.69702	DOCETAXEL	2.5	NCIH2009_LUNG	Female	LUNG	Lung	Non-Small Cell Lung Carcinoma	Lung Adenocarcinoma	2	Mutant	3.36432	5.93987	4.42097	4.00592	4.49016	3.55201	NA	Low	Low	Low_Low
BRD:BRD-K30577245-001-04-3	ACH-000888	0.0310686	DOCETAXEL	2.5	NCIH1793_LUNG	Female	LUNG	Lung	Non-Small Cell Lung Carcinoma	Lung Adenocarcinoma	1	Mutant	3.93254	4.02424	4.88479	4.10322	NA	4.13051	NA	High	High	High_High
BRD:BRD-K30577245-001-04-3	ACH-000890	-2.93294	DOCETAXEL	2.5	SW1271_LUNG	Male	LUNG	Lung	Small Cell Lung Carcinoma	NA	2	Mutant	3.28768	6.82797	4.24948	3.67992	5.28439	3.28598	NA	Low	Low	Low_Low
BRD:BRD-K30577245-001-04-3	ACH-000891	-3.87185	DOCETAXEL	2.5	HCC1438_LUNG	Unknown	LUNG	NA	NA	NA	0	WT	4.25306	2.90276	5.70848	5.02023	NA	NA	NA	High	NA	High_NA
BRD:BRD-K30577245-001-04-3	ACH-000892	-0.734217	DOCETAXEL	2.5	NCIH1563_LUNG	Male	LUNG	Lung	Non-Small Cell Lung Carcinoma	Lung Adenocarcinoma	0	WT	3.44223	4.70055	4.60672	4.03611	NA	3.80468	NA	Low	Low	Low_Low
BRD:BRD-K30577245-001-04-3	ACH-000893	-3.11433	DOCETAXEL	2.5	NCIH1651_LUNG	Male	LUNG	Lung	Non-Small Cell Lung Carcinoma	Lung Adenocarcinoma	2	Mutant	4.32701	6.08426	5.82905	5.03278	3.11851	4.30848	NA	High	High	High_High
BRD:BRD-K30577245-001-04-3	ACH-000895	-1.60442	DOCETAXEL	2.5	CL34_LARGE_INTESTINE	Unknown	LARGE_INTESTINE	NA	NA	NA	1	Mutant	3.74215	6.23927	3.65759	3.63959	NA	NA	NA	High	NA	High_NA
BRD:BRD-K30577245-001-04-3	ACH-000896	-2.77531	DOCETAXEL	2.5	647V_URINARY_TRACT	Male	URINARY_TRACT	Bladder	Bladder Carcinoma	NA	1	Mutant	3.65502	5.6938	3.95297	4.39839	NA	3.11197	NA	High	Low	High_Low
BRD:BRD-K30577245-001-04-3	ACH-000897	-2.11275	DOCETAXEL	2.5	FTC238_THYROID	Unknown	THYROID	NA	NA	NA	2	Mutant	3.1197	5.67352	4.72884	4.03874	NA	NA	NA	Low	NA	Low_NA
BRD:BRD-K30577245-001-04-3	ACH-000898	-2.28449	DOCETAXEL	2.5	SNU719_STOMACH	Unknown	STOMACH	NA	NA	NA	0	WT	4.59509	5.99057	3.8225	4.194	NA	NA	NA	High	NA	High_NA
BRD:BRD-K30577245-001-04-3	ACH-000899	-1.43835	DOCETAXEL	2.5	WM88_SKIN	Unknown	SKIN	NA	NA	NA	0	WT	3.80179	5.52994	5.36613	3.39819	NA	NA	NA	High	NA	High_NA
BRD:BRD-K30577245-001-04-3	ACH-000900	-2.7633	DOCETAXEL	2.5	NCIH23_LUNG	Male	LUNG	Lung	Non-Small Cell Lung Carcinoma	Lung Adenocarcinoma	2	Mutant	3.03546	4.91479	4.35085	3.42839	2.67889	4.4529	NA	Low	High	Low_High
BRD:BRD-K30577245-001-04-3	ACH-000901	-3.20657	DOCETAXEL	2.5	HCC1359_LUNG	Unknown	LUNG	NA	NA	NA	2	Mutant	2.87161	5.96732	4.48799	3.63048	NA	NA	NA	Low	NA	Low_NA
BRD:BRD-K30577245-001-04-3	ACH-000903	-0.277757	DOCETAXEL	2.5	FTC133_THYROID	Male	THYROID	Thyroid	Thyroid Gland Carcinoma	Thyroid gland follicular carcinoma	2	Mutant	2.29777	5.94947	5.61965	3.51437	1.17427	5.17453	NA	Low	High	Low_High
BRD:BRD-K30577245-001-04-3	ACH-000905	-3.90278	DOCETAXEL	2.5	5637_URINARY_TRACT	Male	URINARY_TRACT	Bladder	Bladder Carcinoma	NA	2	Mutant	2.62023	5.919	3.73461	3.62247	NA	3.45833	NA	Low	Low	Low_Low
BRD:BRD-K30577245-001-04-3	ACH-000909	-2.20336	DOCETAXEL	2.5	JHUEM2_ENDOMETRIUM	Female	ENDOMETRIUM	NA	NA	NA	0	WT	4.17443	6.58957	5.02986	4.47051	NA	NA	NA	High	NA	High_NA
BRD:BRD-K30577245-001-04-3	ACH-000911	-2.28533	DOCETAXEL	2.5	NUGC3_STOMACH	Male	STOMACH	Stomach	Gastric Carcinoma	Gastric adenocarcinoma	2	Mutant	3.8553	6.06466	3.54295	4.31543	3.41685	3.40994	NA	High	Low	High_Low
BRD:BRD-K30577245-001-04-3	ACH-000913	-1.30471	DOCETAXEL	2.5	ESS1_ENDOMETRIUM	Female	ENDOMETRIUM	Soft Tissue	Other Sarcomas	Endometrial Stromal Sarcoma	2	Mutant	3.03879	4.10233	5.04493	4.68677	NA	4.21407	NA	Low	Low	Low_Low
BRD:BRD-K30577245-001-04-3	ACH-000915	-1.68271	DOCETAXEL	2.5	IPC298_SKIN	Female	SKIN	Skin	Melanoma	Cutaneous melanoma	2	Mutant	3.55774	2.20248	3.53638	3.63732	NA	2.81065	NA	High	Low	High_Low
BRD:BRD-K30577245-001-04-3	ACH-000917	-1.52771	DOCETAXEL	2.5	TE4_OESOPHAGUS	Female	OESOPHAGUS	Esophagus	Esophageal Carcinoma	Esophageal Squamous Cell Carcinoma	2	Mutant	3.66918	4.8796	5.27772	3.2274	2.69171	4.86848	NA	High	High	High_High
BRD:BRD-K30577245-001-04-3	ACH-000919	-1.88792	DOCETAXEL	2.5	IM95_STOMACH	Male	STOMACH	Stomach	Gastric Carcinoma	Gastric adenocarcinoma	0	WT	4.13151	5.12814	2.9994	4.20587	NA	2.59072	NA	High	Low	High_Low
BRD:BRD-K30577245-001-04-3	ACH-000921	-2.07751	DOCETAXEL	2.5	NCIH1339_LUNG	Unknown	LUNG	NA	NA	NA	1	Mutant	2.95493	3.67455	5.18383	4.6224	NA	NA	NA	Low	NA	Low_NA
BRD:BRD-K30577245-001-04-3	ACH-000924	-2.05135	DOCETAXEL	2.5	NCIH2172_LUNG	Female	LUNG	Lung	Non-Small Cell Lung Carcinoma	NA	0	WT	3.20979	3.30255	4.9067	4.27298	NA	4.79491	2.08447	Low	High	Low_High
BRD:BRD-K30577245-001-04-3	ACH-000926	-2.75594	DOCETAXEL	2.5	HT55_LARGE_INTESTINE	Unknown	LARGE_INTESTINE	Large Intestine	Colorectal Carcinoma	NA	0	WT	3.64734	5.80588	4.06692	3.4808	NA	4.05536	NA	Low	High	Low_High
BRD:BRD-K30577245-001-04-3	ACH-000927	-0.67002	DOCETAXEL	2.5	BT474_BREAST	Female	BREAST	Breast	Breast Carcinoma	Invasive Ductal Carcinoma of No Special Type	2	Mutant	3.44097	6.09821	3.49184	3.93437	2.81321	3.58819	NA	High	Low	High_Low
BRD:BRD-K30577245-001-04-3	ACH-000929	-2.94345	DOCETAXEL	2.5	NCIH2110_LUNG	Unknown	LUNG	Lung	Non-Small Cell Lung Carcinoma	NA	2	Mutant	3.7555	5.86351	4.03883	3.07516	3.17064	3.598	NA	High	Low	High_Low
BRD:BRD-K30577245-001-04-3	ACH-000934	-1.12278	DOCETAXEL	2.5	MDAMB361_BREAST	Female	BREAST	Breast	Breast Carcinoma	Breast adenocarcinoma	1	Mutant	3.42185	3.97874	4.39754	3.66324	NA	3.52295	NA	Low	Low	Low_Low
BRD:BRD-K30577245-001-04-3	ACH-000936	0.0590276	DOCETAXEL	2.5	EFO27_OVARY	Female	OVARY	Ovary	Ovarian Carcinoma	Ovarian mucinous adenocarcinoma	1	Mutant	3.16772	5.95545	4.44103	4.15539	2.94259	3.83147	NA	Low	Low	Low_Low
BRD:BRD-K30577245-001-04-3	ACH-000939	-4.60596	DOCETAXEL	2.5	SKUT1_SOFT_TISSUE	Female	SOFT_TISSUE	Soft Tissue	Leiomyosarcoma	Uterine Corpus Leiomyosarcoma	2	Mutant	3.80179	6.61407	5.00552	4.95201	4.0729	3.38202	NA	High	Low	High_Low
BRD:BRD-K30577245-001-04-3	ACH-000940	-3.77234	DOCETAXEL	2.5	AN3CA_ENDOMETRIUM	Female	ENDOMETRIUM	Endometrium	Endometrial Carcinoma	Endometrial adenocarcinoma	1	Mutant	3.70135	5.0691	5.86672	5.05667	NA	4.95691	NA	High	High	High_High
BRD:BRD-K30577245-001-04-3	ACH-000941	-0.394355	DOCETAXEL	2.5	HEC1B_ENDOMETRIUM	Female	ENDOMETRIUM	NA	NA	NA	2	Mutant	3.6583	6.32298	4.7876	3.63277	NA	NA	NA	High	NA	High_NA
BRD:BRD-K30577245-001-04-3	ACH-000943	-1.62995	DOCETAXEL	2.5	RKO_LARGE_INTESTINE	Unknown	LARGE_INTESTINE	Large Intestine	Colorectal Carcinoma	NA	0	WT	3.41414	3.20916	3.77451	3.90499	NA	3.28579	NA	Low	Low	Low_Low
BRD:BRD-K30577245-001-04-3	ACH-000945	-1.63498	DOCETAXEL	2.5	NCIH650_LUNG	Male	LUNG	Lung	Non-Small Cell Lung Carcinoma	Lung Adenocarcinoma	2	Mutant	3.2636	3.97786	5.44282	4.3014	NA	4.22009	NA	Low	High	Low_High
BRD:BRD-K30577245-001-04-3	ACH-000946	-3.12052	DOCETAXEL	2.5	HEC265_ENDOMETRIUM	Female	ENDOMETRIUM	NA	NA	NA	0	WT	2.87533	5.18772	3.99246	3.83853	NA	NA	NA	Low	NA	Low_NA
BRD:BRD-K30577245-001-04-3	ACH-000947	-1.16553	DOCETAXEL	2.5	OVK18_OVARY	Female	OVARY	Ovary	Ovarian Carcinoma	Ovarian endometrioid adenocarcinoma	0	WT	3.99727	5.40768	4.62875	4.31543	NA	4.04931	NA	High	Low	High_Low
BRD:BRD-K30577245-001-04-3	ACH-000948	-2.85758	DOCETAXEL	2.5	2313287_STOMACH	Male	STOMACH	Stomach	Gastric Carcinoma	Gastric adenocarcinoma	0	WT	4.45702	6.3123	3.1326	4.0614	NA	NA	NA	High	NA	High_NA
BRD:BRD-K30577245-001-04-3	ACH-000950	-2.39004	DOCETAXEL	2.5	LOVO_LARGE_INTESTINE	Male	LARGE_INTESTINE	Large Intestine	Colorectal Carcinoma	Colon adenocarcinoma	0	WT	3.60718	5.06695	4.0646	4.23476	NA	4.28302	NA	Low	High	Low_High
BRD:BRD-K30577245-001-04-3	ACH-000954	-1.85882	DOCETAXEL	2.5	HEC1A_ENDOMETRIUM	Female	ENDOMETRIUM	NA	NA	NA	2	Mutant	3.78986	6.24813	4.58107	4.82451	NA	NA	NA	High	NA	High_NA
BRD:BRD-K30577245-001-04-3	ACH-000955	-1.85491	DOCETAXEL	2.5	SNU407_LARGE_INTESTINE	Male	LARGE_INTESTINE	Large Intestine	Colorectal Carcinoma	Colon adenocarcinoma	0	WT	3.93344	6.39624	5.43938	4.18204	NA	4.73236	NA	High	High	High_High
BRD:BRD-K30577245-001-04-3	ACH-000956	-1.53531	DOCETAXEL	2.5	22RV1_PROSTATE	Male	PROSTATE	Prostate	Prostate Carcinoma	NA	0	WT	4.36939	4.13551	4.36106	3.95766	NA	3.54269	NA	High	Low	High_Low
BRD:BRD-K30577245-001-04-3	ACH-000957	-3.11445	DOCETAXEL	2.5	LS180_LARGE_INTESTINE	Female	LARGE_INTESTINE	Large Intestine	Colorectal Carcinoma	Colon adenocarcinoma	0	WT	3.79981	6.39053	3.87077	4.23399	NA	3.84817	NA	High	Low	High_Low
BRD:BRD-K30577245-001-04-3	ACH-000958	-2.3542	DOCETAXEL	2.5	SW48_LARGE_INTESTINE	Female	LARGE_INTESTINE	Large Intestine	Colorectal Carcinoma	Colon adenocarcinoma	0	WT	4.03327	6.50695	4.04119	4.77776	NA	NA	NA	High	NA	High_NA
BRD:BRD-K30577245-001-04-3	ACH-000961	-2.24209	DOCETAXEL	2.5	ISHIKAWAHERAKLIO02ER_ENDOMETRIUM	Female	ENDOMETRIUM	NA	NA	NA	1	Mutant	4.01195	4.57629	4.91158	4.1258	NA	NA	NA	High	NA	High_NA
BRD:BRD-K30577245-001-04-3	ACH-000962	-3.90913	DOCETAXEL	2.5	OC314_OVARY	Female	OVARY	Ovary	Ovarian Carcinoma	Ovarian serous adenocarcinoma	2	Mutant	3.66484	5.71913	3.80973	4.65757	4.37555	3.7293	NA	High	Low	High_Low
BRD:BRD-K30577245-001-04-3	ACH-000963	-1.63915	DOCETAXEL	2.5	CCK81_LARGE_INTESTINE	Female	LARGE_INTESTINE	Large Intestine	Colorectal Carcinoma	Colon adenocarcinoma	1	Mutant	3.78686	6.47893	3.5031	4.17803	NA	3.0934	NA	High	Low	High_Low
BRD:BRD-K30577245-001-04-3	ACH-000965	-4.48663	DOCETAXEL	2.5	RL952_ENDOMETRIUM	Female	ENDOMETRIUM	Endometrium	Endometrial Carcinoma	Endometrial adenosquamous carcinoma	0	WT	3.48339	5.42814	4.78616	4.57464	NA	4.86843	NA	Low	Low	Low_Low
BRD:BRD-K30577245-001-04-3	ACH-000966	-2.46819	DOCETAXEL	2.5	IGROV1_OVARY	Female	OVARY	Ovary	Ovarian Carcinoma	Ovarian endometrioid adenocarcinoma	1	Mutant	3.8097	5.1161	4.59804	4.31101	NA	4.97933	NA	High	High	High_High
BRD:BRD-K30577245-001-04-3	ACH-000967	-1.63806	DOCETAXEL	2.5	SNUC2A_LARGE_INTESTINE	Unknown	LARGE_INTESTINE	NA	NA	NA	2	Mutant	4.46462	5.96543	5.15923	4.48243	NA	NA	NA	High	NA	High_NA
BRD:BRD-K30577245-001-04-3	ACH-000968	-1.62823	DOCETAXEL	2.5	COLO792_SKIN	Male	SKIN	Skin	Melanoma	NA	0	WT	2.94255	4.25619	3.26555	1.87953	NA	3.6784	NA	Low	Low	Low_Low
BRD:BRD-K30577245-001-04-3	ACH-000970	0.863625	DOCETAXEL	2.5	NA	Female	NA	Large Intestine	Colorectal Carcinoma	Cecum adenocarcinoma	1	Mutant	4.0501	5.86654	4.90892	4.43962	3.16171	3.99442	NA	High	High	High_High
BRD:BRD-K30577245-001-04-3	ACH-000971	-2.51073	DOCETAXEL	2.5	HCT116_LARGE_INTESTINE	Male	LARGE_INTESTINE	Large Intestine	Colorectal Carcinoma	NA	0	WT	4.05512	4.92382	4.61482	4.20429	NA	3.95291	NA	High	High	High_High
BRD:BRD-K30577245-001-04-3	ACH-000972	-2.71395	DOCETAXEL	2.5	HEC151_ENDOMETRIUM	Female	ENDOMETRIUM	NA	NA	NA	0	WT	2.90295	5.47219	4.27057	3.66101	NA	NA	NA	Low	NA	Low_NA
BRD:BRD-K30577245-001-04-3	ACH-000973	-3.4444	DOCETAXEL	2.5	639V_URINARY_TRACT	Male	URINARY_TRACT	Bladder	Bladder Carcinoma	NA	2	Mutant	3.27498	6.33451	4.62394	4.46184	5.46551	4.24093	1.00833	Low	High	Low_High
BRD:BRD-K30577245-001-04-3	ACH-000974	-3.05228	DOCETAXEL	2.5	SNGM_ENDOMETRIUM	Female	ENDOMETRIUM	Endometrium	Endometrial Carcinoma	Endometrial adenocarcinoma	0	WT	3.00854	6.2027	4.30927	3.98698	NA	5.08051	NA	Low	High	Low_High
BRD:BRD-K30577245-001-04-3	ACH-000976	-1.82979	DOCETAXEL	2.5	HUCCT1_BILIARY_TRACT	Male	BILIARY_TRACT	Biliary Tract	Biliary Tract Carcinoma	Intrahepatic Cholangiocarcinoma	2	Mutant	2.50533	4.82343	2.611	1.7318	NA	3.46989	NA	Low	Low	Low_Low
BRD:BRD-K30577245-001-04-3	ACH-000977	-1.08918	DOCETAXEL	2.5	LNCAPCLONEFGC_PROSTATE	Male	PROSTATE	Prostate	Prostate Carcinoma	NA	0	WT	3.1859	6.15189	4.45425	3.89346	NA	3.11928	NA	Low	Low	Low_Low
BRD:BRD-K30577245-001-04-3	ACH-000978	1.19503	DOCETAXEL	2.5	EN_ENDOMETRIUM	Female	ENDOMETRIUM	Endometrium	Endometrial Carcinoma	NA	1	Mutant	4.27334	5.55909	5.49398	4.53497	3.11506	5.17999	NA	High	High	High_High
BRD:BRD-K30577245-001-04-3	ACH-000979	-2.39711	DOCETAXEL	2.5	DU145_PROSTATE	Male	PROSTATE	Prostate	Prostate Carcinoma	NA	1	Mutant	NA	NA	NA	NA	3.07965	4.13417	NA	NA	High	NA_High
BRD:BRD-K30577245-001-04-3	ACH-000982	-2.81066	DOCETAXEL	2.5	GP2D_LARGE_INTESTINE	Unknown	LARGE_INTESTINE	NA	NA	NA	0	WT	4.5829	6.22519	4.68837	4.96028	NA	NA	NA	High	NA	High_NA
BRD:BRD-K30577245-001-04-3	ACH-000984	-1.63855	DOCETAXEL	2.5	HEC6_ENDOMETRIUM	Female	ENDOMETRIUM	NA	NA	NA	1	Mutant	3.96924	5.52614	5.37853	4.53625	NA	NA	NA	High	NA	High_NA
BRD:BRD-K30577245-001-04-3	ACH-000985	-2.33937	DOCETAXEL	2.5	LS411N_LARGE_INTESTINE	Male	LARGE_INTESTINE	Large Intestine	Colorectal Carcinoma	Cecum adenocarcinoma	0	WT	3.83994	3.43832	3.81339	4.37523	NA	3.41208	NA	High	Low	High_Low
BRD:BRD-K30577245-001-04-3	ACH-000986	-2.63586	DOCETAXEL	2.5	HT115_LARGE_INTESTINE	Unknown	LARGE_INTESTINE	Large Intestine	Colorectal Carcinoma	NA	1	Mutant	3.14314	2.38497	3.08161	3.19601	NA	3.73572	NA	Low	Low	Low_Low
BRD:BRD-K30577245-001-04-3	ACH-000987	-2.2206	DOCETAXEL	2.5	MEWO_SKIN	Male	SKIN	Skin	Melanoma	Cutaneous melanoma	2	Mutant	3.28205	4.43035	5.09396	3.44777	NA	4.2942	NA	Low	High	Low_High
BRD:BRD-K30577245-001-04-3	ACH-000988	-2.01531	DOCETAXEL	2.5	MFE319_ENDOMETRIUM	Female	ENDOMETRIUM	Endometrium	Endometrial Carcinoma	Endometrial adenosquamous carcinoma	2	Mutant	4.17289	6.35055	4.66875	3.55565	NA	5.18998	NA	High	High	High_High
BRD:BRD-K30577245-001-04-3	ACH-000990	-3.52614	DOCETAXEL	2.5	HEC108_ENDOMETRIUM	Female	ENDOMETRIUM	NA	NA	NA	1	Mutant	3.54482	5.9595	5.02412	4.64633	NA	NA	NA	Low	NA	Low_NA
BRD:BRD-K30577245-001-04-3	ACH-000991	0.117822	DOCETAXEL	2.5	SNU81_LARGE_INTESTINE	Male	LARGE_INTESTINE	Large Intestine	Colorectal Carcinoma	Colon adenocarcinoma	2	Mutant	3.61732	5.98239	4.93834	4.22155	3.43332	3.62767	NA	Low	Low	Low_Low
BRD:BRD-K30577245-001-04-3	ACH-000996	-2.67485	DOCETAXEL	2.5	HEC251_ENDOMETRIUM	Female	ENDOMETRIUM	NA	NA	NA	1	Mutant	3.26217	4.74708	4.14965	3.93249	NA	NA	NA	Low	NA	Low_NA
BRD:BRD-K30577245-001-04-3	ACH-000997	-2.43731	DOCETAXEL	2.5	HCT15_LARGE_INTESTINE	Male	LARGE_INTESTINE	Large Intestine	Colorectal Carcinoma	Colon adenocarcinoma	1	Mutant	4.35721	5.61814	4.20568	4.67165	1.80863	3.58647	1.94504	High	Low	High_Low
BRD:BRD-K30577245-001-04-3	ACH-000998	-0.547937	DOCETAXEL	2.5	CW2_LARGE_INTESTINE	Female	LARGE_INTESTINE	Large Intestine	Colorectal Carcinoma	Colon adenocarcinoma	0	WT	3.90601	6.77418	3.41059	2.11148	NA	2.83418	NA	High	Low	High_Low
BRD:BRD-K30577245-001-04-3	ACH-001007	-2.07829	DOCETAXEL	2.5	NA	Unknown	NA	NA	NA	NA	NA	NA	NA	NA	NA	NA	NA	NA	NA	NA	NA	NA_NA
BRD:BRD-K30577245-001-04-3	ACH-001008	-2.65797	DOCETAXEL	2.5	NA	Unknown	NA	NA	NA	NA	NA	NA	NA	NA	NA	NA	NA	NA	NA	NA	NA	NA_NA
BRD:BRD-K30577245-001-04-3	ACH-001009	-2.14747	DOCETAXEL	2.5	NA	Unknown	NA	NA	NA	NA	NA	NA	NA	NA	NA	NA	NA	NA	NA	NA	NA	NA_NA
BRD:BRD-K30577245-001-04-3	ACH-001010	-2.56586	DOCETAXEL	2.5	NA	Unknown	NA	NA	NA	NA	NA	NA	NA	NA	NA	NA	NA	NA	NA	NA	NA	NA_NA
BRD:BRD-K30577245-001-04-3	ACH-001022	-2.53238	DOCETAXEL	2.5	CBAGPN_BONE	Unknown	BONE	NA	NA	NA	0	WT	4.19316	6.96049	5.46173	5.00134	NA	NA	NA	High	NA	High_NA
BRD:BRD-K30577245-001-04-3	ACH-001024	-2.50558	DOCETAXEL	2.5	CHL1_SKIN	Female	SKIN	Skin	Melanoma	NA	2	Mutant	NA	NA	NA	NA	NA	3.21463	NA	NA	Low	NA_Low
BRD:BRD-K30577245-001-04-3	ACH-001029	-1.11047	DOCETAXEL	2.5	CHLA10_BONE	Unknown	BONE	NA	NA	NA	0	WT	4.18038	6.76422	5.63586	5.23228	NA	NA	NA	High	NA	High_NA
BRD:BRD-K30577245-001-04-3	ACH-001075	-3.52351	DOCETAXEL	2.5	NCIH292_LUNG	Female	LUNG	Lung	Other Solid Carcinomas	Lung mucoepidermoid carcinoma	0	WT	3.0619	5.24657	4.02697	4.34454	NA	3.69648	NA	Low	Low	Low_Low
BRD:BRD-K30577245-001-04-3	ACH-001099	-1.1179	DOCETAXEL	2.5	KD_SOFT_TISSUE	Unknown	SOFT_TISSUE	NA	NA	NA	0	WT	3.06517	5.85512	4.83907	3.66771	NA	NA	NA	Low	NA	Low_NA
BRD:BRD-K30577245-001-04-3	ACH-001113	-0.797175	DOCETAXEL	2.5	LC1SQSF_LUNG	Unknown	LUNG	NA	NA	NA	2	Mutant	4.13689	4.97821	5.18961	4.11247	NA	NA	NA	High	NA	High_NA
BRD:BRD-K30577245-001-04-3	ACH-001128	-3.07657	DOCETAXEL	2.5	MON_SOFT_TISSUE	Unknown	SOFT_TISSUE	NA	NA	NA	0	WT	5.23251	5.93721	6.0149	4.32495	NA	NA	NA	High	NA	High_NA
BRD:BRD-K30577245-001-04-3	ACH-001145	-4.04842	DOCETAXEL	2.5	OC316_OVARY	Female	OVARY	NA	NA	NA	2	Mutant	3.88581	5.85877	4.70278	5.28737	NA	NA	NA	High	NA	High_NA
BRD:BRD-K30577245-001-04-3	ACH-001163	-1.35663	DOCETAXEL	2.5	PEDS005TADH_KIDNEY	Unknown	KIDNEY	NA	NA	NA	1	Mutant	4.29616	6.2311	4.59992	4.01203	NA	NA	NA	High	NA	High_NA
BRD:BRD-K30577245-001-04-3	ACH-001163	-1.35663	DOCETAXEL	2.5	PEDS005TSUSP_KIDNEY	Unknown	KIDNEY	NA	NA	NA	1	Mutant	4.29616	6.2311	4.59992	4.01203	NA	NA	NA	High	NA	High_NA
BRD:BRD-K30577245-001-04-3	ACH-001164	0.0541449	DOCETAXEL	2.5	CCLFPEDS0003T_SOFT_TISSUE	Unknown	SOFT_TISSUE	NA	NA	NA	0	WT	3.2402	5.93366	2.92965	3.35513	NA	NA	NA	Low	NA	Low_NA
BRD:BRD-K30577245-001-04-3	ACH-001190	-2.55704	DOCETAXEL	2.5	SKMEL2_SKIN	Male	SKIN	Skin	Melanoma	NA	2	Mutant	3.87412	4.38406	4.78652	3.66114	NA	3.5824	NA	High	Low	High_Low
BRD:BRD-K30577245-001-04-3	ACH-001192	-2.47992	DOCETAXEL	2.5	SKNEP1_BONE	Unknown	BONE	NA	NA	NA	2	Mutant	4.37206	6.91095	5.77103	4.71579	NA	NA	NA	High	NA	High_NA
BRD:BRD-K30577245-001-04-3	ACH-001193	-3.56053	DOCETAXEL	2.5	SKPNDW_BONE	Male	BONE	Other tissue	Other Solid Carcinomas	Primitive Neuroectodermal Tumor	2	Mutant	4.14961	5.92315	5.10452	3.37549	2.01345	3.66588	NA	High	Low	High_Low
BRD:BRD-K30577245-001-04-3	ACH-001200	-0.556972	DOCETAXEL	2.5	STM9101_SOFT_TISSUE	Unknown	SOFT_TISSUE	NA	NA	NA	0	WT	5.07059	5.36838	4.03962	4.37876	NA	NA	NA	High	NA	High_NA
BRD:BRD-K30577245-001-04-3	ACH-001205	-1.04911	DOCETAXEL	2.5	TC32_BONE	Unknown	BONE	NA	NA	NA	0	WT	NA	NA	NA	NA	NA	NA	NA	NA	NA	NA_NA
BRD:BRD-K30577245-001-04-3	ACH-001210	-1.48267	DOCETAXEL	2.5	TTC1240_SOFT_TISSUE	Unknown	SOFT_TISSUE	NA	NA	NA	0	WT	4.06923	6.32615	5.85704	3.91357	NA	NA	NA	High	NA	High_NA
BRD:BRD-K30577245-001-04-3	ACH-001211	0.079759	DOCETAXEL	2.5	TTC549_SOFT_TISSUE	Unknown	SOFT_TISSUE	NA	NA	NA	0	WT	3.57055	5.1335	5.68875	4.50535	NA	NA	NA	High	NA	High_NA
BRD:BRD-K30577245-001-04-3	ACH-001212	-1.39744	DOCETAXEL	2.5	TTC642_SOFT_TISSUE	Unknown	SOFT_TISSUE	NA	NA	NA	NA	NA	NA	NA	NA	NA	NA	NA	NA	NA	NA	NA_NA
BRD:BRD-K30577245-001-04-3	ACH-001239	-1.82282	DOCETAXEL	2.5	WM2664_SKIN	Unknown	SKIN	NA	NA	NA	0	WT	3.9657	4.91289	4.60347	4.04924	NA	NA	NA	High	NA	High_NA
BRD:BRD-K30577245-001-04-3	ACH-001306	-3.68883	DOCETAXEL	2.5	8305C_THYROID	Female	THYROID	Thyroid	Thyroid Gland Carcinoma	Thyroid gland anaplastic carcinoma	2	Mutant	3.21127	6.01872	4.78038	4.26465	3.3372	4.22579	NA	High	High	High_High
BRD:BRD-K30577245-001-04-3	ACH-001307	-2.59828	DOCETAXEL	2.5	8505C_THYROID	Female	THYROID	Thyroid	Thyroid Gland Carcinoma	Thyroid gland anaplastic carcinoma	2	Mutant	2.69774	6.10643	4.45844	4.62902	4.32985	3.33133	NA	Low	Low	Low_Low
BRD:BRD-K30577245-001-04-3	ACH-001318	-1.0731	DOCETAXEL	2.5	PLCPRF5_LIVER	Unknown	LIVER	NA	NA	NA	2	Mutant	5.45189	4.07425	4.985	4.74857	NA	NA	NA	High	NA	High_NA
BRD:BRD-K30577245-001-04-3	ACH-001321	-1.50977	DOCETAXEL	2.5	TT_THYROID	Female	THYROID	Thyroid	Thyroid Gland Carcinoma	Hereditary thyroid gland medullary carcinoma	0	WT	3.69497	4.21273	5.82276	3.60284	NA	5.1437	NA	High	High	High_High
BRD:BRD-K30577245-341-01-9	ACH-000001	0.181102	DOCETAXEL	2.5	NIHOVCAR3_OVARY	Female	OVARY	Ovary	Ovarian Carcinoma	High grade ovarian serous adenocarcinoma	2	Mutant	3.03713	5.65674	5.02699	3.56877	2.03756	4.37572	NA	Low	High	Low_High
BRD:BRD-K30577245-341-01-9	ACH-000007	-3.247	DOCETAXEL	2.5	LS513_LARGE_INTESTINE	Male	LARGE_INTESTINE	Large Intestine	Colorectal Carcinoma	Cecum adenocarcinoma	0	WT	3.23476	5.95091	4.24605	3.68324	NA	4.20772	NA	Low	High	Low_High
BRD:BRD-K30577245-341-01-9	ACH-000008	-2.73348	DOCETAXEL	2.5	A101D_SKIN	Unknown	SKIN	NA	NA	NA	0	WT	3.54246	4.44084	4.16639	3.64412	NA	NA	NA	High	NA	High_NA
BRD:BRD-K30577245-341-01-9	ACH-000011	-2.68519	DOCETAXEL	2.5	253J_URINARY_TRACT	Unknown	URINARY_TRACT	NA	NA	NA	0	WT	3.12599	5.41077	4.38694	3.32351	NA	NA	NA	Low	NA	Low_NA
BRD:BRD-K30577245-341-01-9	ACH-000012	-1.34343	DOCETAXEL	2.5	HCC827_LUNG	Female	LUNG	Lung	Non-Small Cell Lung Carcinoma	Lung Adenocarcinoma	0	WT	2.97765	5.68926	4.36106	3.88185	NA	3.43392	NA	Low	Low	Low_Low
BRD:BRD-K30577245-341-01-9	ACH-000013	-2.08843	DOCETAXEL	2.5	ONCODG1_OVARY	Female	OVARY	NA	NA	NA	2	Mutant	3.01531	6.09777	4.29803	3.72998	NA	NA	NA	Low	NA	Low_NA
BRD:BRD-K30577245-341-01-9	ACH-000014	-2.50676	DOCETAXEL	2.5	HS294T_SKIN	Unknown	SKIN	NA	NA	NA	0	WT	3.75448	5.86806	3.86283	3.42448	NA	NA	NA	High	NA	High_NA
BRD:BRD-K30577245-341-01-9	ACH-000015	-3.08391	DOCETAXEL	2.5	NCIH1581_LUNG	Male	LUNG	Lung	Non-Small Cell Lung Carcinoma	Lung large cell carcinoma	2	Mutant	3.33332	2.40535	3.86548	4.54578	NA	3.9951	NA	Low	High	Low_High
BRD:BRD-K30577245-341-01-9	ACH-000018	-1.1273	DOCETAXEL	2.5	T24_URINARY_TRACT	Female	URINARY_TRACT	Bladder	Bladder Carcinoma	NA	0	WT	3.18138	3.36263	5.36645	4.66287	NA	4.46353	NA	Low	High	Low_High
BRD:BRD-K30577245-341-01-9	ACH-000019	-4.05844	DOCETAXEL	2.5	MCF7_BREAST	Female	BREAST	Breast	Breast Carcinoma	Invasive Ductal Carcinoma of No Special Type	0	WT	3.50173	6.3123	3.90643	2.99134	NA	4.06704	NA	High	High	High_High
BRD:BRD-K30577245-341-01-9	ACH-000021	-4.10428	DOCETAXEL	2.5	NCIH1693_LUNG	Female	LUNG	Lung	Non-Small Cell Lung Carcinoma	Lung Adenocarcinoma	0	WT	3.6374	4.05833	3.88304	4.59441	NA	3.57091	NA	High	Low	High_Low
BRD:BRD-K30577245-341-01-9	ACH-000022	-2.15004	DOCETAXEL	2.5	PATU8988S_PANCREAS	Unknown	PANCREAS	NA	NA	NA	2	Mutant	3.87429	5.51019	3.45292	4.55336	NA	NA	NA	High	NA	High_NA
BRD:BRD-K30577245-341-01-9	ACH-000023	-1.91017	DOCETAXEL	2.5	PATU8988T_PANCREAS	Female	PANCREAS	Pancreas	Pancreatic Carcinoma	Pancreatic adenocarcinoma	2	Mutant	3.85052	6.59519	3.88391	5.18607	3.29311	3.16898	NA	High	Low	High_Low
BRD:BRD-K30577245-341-01-9	ACH-000026	-1.91621	DOCETAXEL	2.5	253JBV_URINARY_TRACT	Unknown	URINARY_TRACT	NA	NA	NA	0	WT	3.40249	5.64359	4.20639	3.9521	NA	NA	NA	High	NA	High_NA
BRD:BRD-K30577245-341-01-9	ACH-000027	-1.23947	DOCETAXEL	2.5	GOS3_CENTRAL_NERVOUS_SYSTEM	Unknown	CENTRAL_NERVOUS_SYSTEM	NA	NA	NA	0	WT	3.87993	6.02784	5.75305	4.37665	NA	NA	NA	High	NA	High_NA
BRD:BRD-K30577245-341-01-9	ACH-000030	-2.65501	DOCETAXEL	2.5	PC14_LUNG	Male	LUNG	Lung	Non-Small Cell Lung Carcinoma	Lung Adenocarcinoma	2	Mutant	3.13069	6.74456	4.44525	4.04837	5.14414	4.33118	NA	Low	High	Low_High
BRD:BRD-K30577245-341-01-9	ACH-000035	-4.65101	DOCETAXEL	2.5	NCIH1650_LUNG	Male	LUNG	Lung	Non-Small Cell Lung Carcinoma	Lung Adenocarcinoma	0	WT	3.44476	3.61351	5.08649	4.46184	NA	3.75313	NA	Low	Low	Low_Low
BRD:BRD-K30577245-341-01-9	ACH-000037	-1.06358	DOCETAXEL	2.5	S117_THYROID	Unknown	THYROID	NA	NA	NA	2	Mutant	2.69983	2.19376	4.37563	3.13441	NA	NA	NA	Low	NA	Low_NA
BRD:BRD-K30577245-341-01-9	ACH-000040	-2.10216	DOCETAXEL	2.5	U118MG_CENTRAL_NERVOUS_SYSTEM	Male	CENTRAL_NERVOUS_SYSTEM	Central Nervous System	Glioma	Low Grade Glioma	2	Mutant	3.57633	4.97367	5.85276	4.59319	3.02349	4.65349	NA	High	High	High_High
BRD:BRD-K30577245-341-01-9	ACH-000041	-1.73427	DOCETAXEL	2.5	RDES_BONE	Unknown	BONE	NA	NA	NA	2	Mutant	4.03665	6.64664	5.4161	4.49295	NA	NA	NA	High	NA	High_NA
BRD:BRD-K30577245-341-01-9	ACH-000042	-4.09065	DOCETAXEL	2.5	PANC0203_PANCREAS	Female	PANCREAS	Pancreas	Pancreatic Carcinoma	Pancreatic adenocarcinoma	2	Mutant	2.7452	4.4467	4.45126	3.45289	3.81536	4.04583	NA	Low	High	Low_High
BRD:BRD-K30577245-341-01-9	ACH-000046	-3.91787	DOCETAXEL	2.5	ACHN_KIDNEY	Male	KIDNEY	Kidney	Kidney Carcinoma	Papillary renal cell carcinoma	0	WT	3.16315	5.41794	4.85936	4.19638	NA	4.6473	NA	Low	High	Low_High
BRD:BRD-K30577245-341-01-9	ACH-000047	-3.43559	DOCETAXEL	2.5	GCIY_STOMACH	Female	STOMACH	Stomach	Gastric Carcinoma	Gastric adenocarcinoma	2	Mutant	NA	NA	NA	NA	NA	4.82782	NA	NA	High	NA_High
BRD:BRD-K30577245-341-01-9	ACH-000048	-1.82842	DOCETAXEL	2.5	TOV112D_OVARY	Female	OVARY	Ovary	Ovarian Carcinoma	Ovarian endometrioid adenocarcinoma	2	Mutant	3.90785	6.7739	5.0774	4.27599	3.64731	4.03285	NA	High	Low	High_Low
BRD:BRD-K30577245-341-01-9	ACH-000052	-1.85233	DOCETAXEL	2.5	A673_BONE	Female	BONE	Bone	Ewing's Sarcoma	NA	0	WT	3.98157	3.41135	4.99926	4.40187	NA	4.23095	NA	Low	High	Low_High
BRD:BRD-K30577245-341-01-9	ACH-000054	-4.15271	DOCETAXEL	2.5	HT1080_SOFT_TISSUE	Male	SOFT_TISSUE	Soft Tissue	Other Sarcomas	Fibrosarcoma	0	WT	3.24636	5.21802	3.93958	3.83853	NA	3.89103	NA	Low	Low	Low_Low
BRD:BRD-K30577245-341-01-9	ACH-000060	-3.60685	DOCETAXEL	2.5	PANC1005_PANCREAS	Male	PANCREAS	Pancreas	Pancreatic Carcinoma	Pancreatic ductal adenocarcinoma	2	Mutant	3.70453	4.67449	4.36106	3.48707	NA	3.24938	NA	High	Low	High_Low
BRD:BRD-K30577245-341-01-9	ACH-000062	-2.80069	DOCETAXEL	2.5	RERFLCMS_LUNG	Male	LUNG	Lung	Non-Small Cell Lung Carcinoma	Lung Adenocarcinoma	0	WT	3.28205	2.43045	4.78038	4.10322	NA	4.3109	NA	Low	High	Low_High
BRD:BRD-K30577245-341-01-9	ACH-000066	-1.12466	DOCETAXEL	2.5	HCC4006_LUNG	Unknown	LUNG	NA	NA	NA	2	Mutant	3.7077	6.44023	4.43679	4.17883	NA	NA	NA	High	NA	High_NA
BRD:BRD-K30577245-341-01-9	ACH-000075	-4.18315	DOCETAXEL	2.5	U87MG_CENTRAL_NERVOUS_SYSTEM	Unknown	CENTRAL_NERVOUS_SYSTEM	NA	NA	NA	0	WT	3.10387	3.9106	4.94268	1.5381	NA	NA	NA	Low	NA	Low_NA
BRD:BRD-K30577245-341-01-9	ACH-000078	-2.14662	DOCETAXEL	2.5	MHHNB11_AUTONOMIC_GANGLIA	Male	AUTONOMIC_GANGLIA	Peripheral Nervous System	Neuroblastoma	NA	0	WT	4.30676	5.02547	5.66364	3.8265	NA	4.95444	NA	High	High	High_High
BRD:BRD-K30577245-341-01-9	ACH-000082	-0.563781	DOCETAXEL	2.5	G292CLONEA141B1_BONE	Female	BONE	Bone	Osteosarcoma	NA	0	WT	2.84148	2.51512	5.27354	4.64098	NA	4.58237	NA	Low	High	Low_High
BRD:BRD-K30577245-341-01-9	ACH-000085	-1.88534	DOCETAXEL	2.5	NA	Unknown	NA	NA	NA	NA	2	Mutant	2.54541	5.23467	4.62394	4.38369	NA	NA	NA	Low	NA	Low_NA
BRD:BRD-K30577245-341-01-9	ACH-000086	0.362807	DOCETAXEL	2.5	ACCMESO1_PLEURA	Unknown	PLEURA	NA	NA	NA	0	WT	2.73909	1.77681	3.3926	3.37952	NA	NA	NA	Low	NA	Low_NA
BRD:BRD-K30577245-341-01-9	ACH-000087	-3.98101	DOCETAXEL	2.5	SKES1_BONE	Male	BONE	Bone	Ewing's Sarcoma	NA	2	Mutant	4.07993	6.92512	5.49217	4.08884	4.46983	4.81089	0.00377	High	High	High_High
BRD:BRD-K30577245-341-01-9	ACH-000090	-3.05854	DOCETAXEL	2.5	PC3_PROSTATE	Male	PROSTATE	Prostate	Prostate Carcinoma	NA	0	WT	2.76937	1.57116	4.10584	3.43746	NA	4.10717	NA	Low	High	Low_High
BRD:BRD-K30577245-341-01-9	ACH-000091	-0.507759	DOCETAXEL	2.5	OV56_OVARY	Female	OVARY	Ovary	Ovarian Carcinoma	Ovarian serous adenocarcinoma	0	WT	3.33196	2.57506	4.9366	3.90116	NA	4.00673	NA	High	Low	High_Low
BRD:BRD-K30577245-341-01-9	ACH-000092	-3.11433	DOCETAXEL	2.5	NCIH2452_PLEURA	Male	PLEURA	Lung	Mesothelioma	Pleural Biphasic Mesothelioma	0	WT	3.09909	5.10101	5.39148	3.88088	NA	4.67738	NA	Low	High	Low_High
BRD:BRD-K30577245-341-01-9	ACH-000096	-2.7531	DOCETAXEL	2.5	G401_SOFT_TISSUE	Male	SOFT_TISSUE	Other tissue	Other Solid Carcinomas	Rhabdoid Tumour of the Kidney	0	WT	4.37208	5.79132	5.06865	4.84659	NA	4.48878	NA	High	High	High_High
BRD:BRD-K30577245-341-01-9	ACH-000097	-3.2554	DOCETAXEL	2.5	ZR751_BREAST	Female	BREAST	NA	NA	NA	0	WT	3.9964	4.1056	4.18509	3.77431	NA	NA	NA	High	NA	High_NA
BRD:BRD-K30577245-341-01-9	ACH-000098	-3.58171	DOCETAXEL	2.5	GAMG_CENTRAL_NERVOUS_SYSTEM	Female	CENTRAL_NERVOUS_SYSTEM	Central Nervous System	Glioblastoma	NA	2	Mutant	3.09269	5.03518	5.42873	4.41708	NA	3.56964	0.69865	Low	Low	Low_Low
BRD:BRD-K30577245-341-01-9	ACH-000099	-1.53655	DOCETAXEL	2.5	SIMA_AUTONOMIC_GANGLIA	Male	AUTONOMIC_GANGLIA	Peripheral Nervous System	Neuroblastoma	NA	0	WT	3.72659	4.98872	4.65414	3.23625	NA	4.63977	NA	Low	Low	Low_Low
BRD:BRD-K30577245-341-01-9	ACH-000102	-1.71357	DOCETAXEL	2.5	NA	Unknown	NA	NA	NA	NA	2	Mutant	3.56008	6.4366	5.57491	3.94559	NA	NA	NA	High	NA	High_NA
BRD:BRD-K30577245-341-01-9	ACH-000107	-2.53854	DOCETAXEL	2.5	CAPAN2_PANCREAS	Male	PANCREAS	Pancreas	Pancreatic Carcinoma	Pancreatic ductal adenocarcinoma	2	Mutant	3.418	5.08578	4.15549	4.24479	NA	3.6229	NA	High	Low	High_Low
BRD:BRD-K30577245-341-01-9	ACH-000108	-2.46539	DOCETAXEL	2.5	KP3_PANCREAS	Male	PANCREAS	Pancreas	Pancreatic Carcinoma	Pancreatic adenosquamous carcinoma	0	WT	4.29547	3.53802	4.25495	4.23785	NA	4.37908	NA	High	High	High_High
BRD:BRD-K30577245-341-01-9	ACH-000114	2.03205	DOCETAXEL	2.5	NA	Female	NA	Pancreas	Pancreatic Carcinoma	Pancreatic adenocarcinoma	2	Mutant	3.26788	5.34958	4.36805	4.15376	NA	3.50141	NA	Low	Low	Low_Low
BRD:BRD-K30577245-341-01-9	ACH-000116	-3.71367	DOCETAXEL	2.5	NA	Female	NA	Ovary	Ovarian Carcinoma	High grade ovarian serous adenocarcinoma	0	WT	4.18821	1.82969	4.2753	4.79889	NA	3.8228	NA	High	Low	High_Low
BRD:BRD-K30577245-341-01-9	ACH-000117	-0.959867	DOCETAXEL	2.5	EFM192A_BREAST	Female	BREAST	Breast	Breast Carcinoma	NA	0	WT	3.51743	2.76385	4.17072	2.86583	NA	3.97948	NA	High	High	High_High
BRD:BRD-K30577245-341-01-9	ACH-000118	-2.71904	DOCETAXEL	2.5	HUPT3_PANCREAS	Male	PANCREAS	Pancreas	Pancreatic Carcinoma	Pancreatic adenocarcinoma	2	Mutant	2.79118	4.17656	4.46499	2.53861	NA	3.32092	NA	Low	Low	Low_Low
BRD:BRD-K30577245-341-01-9	ACH-000120	-0.490013	DOCETAXEL	2.5	CHP212_AUTONOMIC_GANGLIA	Male	AUTONOMIC_GANGLIA	Peripheral Nervous System	Neuroblastoma	NA	0	WT	3.6374	6.40563	5.16073	4.41777	NA	4.83829	NA	Low	Low	Low_Low
BRD:BRD-K30577245-341-01-9	ACH-000123	-3.69593	DOCETAXEL	2.5	COV434_OVARY	Female	OVARY	NA	NA	NA	0	WT	3.61508	4.75611	4.12232	4.15783	NA	NA	NA	High	NA	High_NA
BRD:BRD-K30577245-341-01-9	ACH-000132	-1.64944	DOCETAXEL	2.5	JHOS2_OVARY	Female	OVARY	Ovary	Ovarian Carcinoma	High grade ovarian serous adenocarcinoma	0	WT	3.67567	6.30249	2.82904	4.08288	NA	2.9704	NA	High	Low	High_Low
BRD:BRD-K30577245-341-01-9	ACH-000133	-3.06833	DOCETAXEL	2.5	HS729_SOFT_TISSUE	Unknown	SOFT_TISSUE	NA	NA	NA	2	Mutant	2.79118	6.39499	4.83302	3.96228	NA	NA	NA	Low	NA	Low_NA
BRD:BRD-K30577245-341-01-9	ACH-000137	-1.52751	DOCETAXEL	2.5	8MGBA_CENTRAL_NERVOUS_SYSTEM	Female	CENTRAL_NERVOUS_SYSTEM	Central Nervous System	Glioblastoma	NA	2	Mutant	4.075	6.37167	4.94528	3.31793	3.2683	3.90342	NA	High	Low	High_Low
BRD:BRD-K30577245-341-01-9	ACH-000138	-4.26342	DOCETAXEL	2.5	CFPAC1_PANCREAS	Male	PANCREAS	Pancreas	Pancreatic Carcinoma	Pancreatic ductal adenocarcinoma	2	Mutant	3.11497	3.99377	4.54655	2.92446	NA	5.08581	NA	Low	High	Low_High
BRD:BRD-K30577245-341-01-9	ACH-000139	-2.17625	DOCETAXEL	2.5	PANC0327_PANCREAS	Female	PANCREAS	Pancreas	Pancreatic Carcinoma	Pancreatic adenocarcinoma	0	WT	2.59571	4.28544	3.25634	3.59469	NA	3.30836	NA	Low	Low	Low_Low
BRD:BRD-K30577245-341-01-9	ACH-000141	-2.64591	DOCETAXEL	2.5	SNU308_BILIARY_TRACT	Unknown	BILIARY_TRACT	NA	NA	NA	0	WT	3.57864	5.16772	5.00219	3.93249	NA	NA	NA	High	NA	High_NA
BRD:BRD-K30577245-341-01-9	ACH-000142	-4.62895	DOCETAXEL	2.5	CAL29_URINARY_TRACT	Female	URINARY_TRACT	Bladder	Bladder Carcinoma	NA	2	Mutant	3.36565	4.96816	4.95906	3.48832	NA	4.33013	NA	High	High	High_High
BRD:BRD-K30577245-341-01-9	ACH-000147	-2.24979	DOCETAXEL	2.5	T47D_BREAST	Female	BREAST	Breast	Breast Carcinoma	Invasive Ductal Carcinoma of No Special Type	2	Mutant	3.13537	5.52392	4.87938	4.52023	3.62894	3.82558	NA	Low	Low	Low_Low
BRD:BRD-K30577245-341-01-9	ACH-000149	0.0172692	DOCETAXEL	2.5	SKNSH_AUTONOMIC_GANGLIA	Female	AUTONOMIC_GANGLIA	Peripheral Nervous System	Neuroblastoma	NA	0	WT	3.78786	5.90501	5.01133	4.54578	NA	4.88008	NA	Low	High	Low_High
BRD:BRD-K30577245-341-01-9	ACH-000153	-1.41623	DOCETAXEL	2.5	NCIH2052_PLEURA	Male	PLEURA	Lung	Mesothelioma	Pleural Sarcomatoid Mesothelioma	0	WT	3.73076	5.03869	3.76793	4.81015	NA	2.75167	NA	High	Low	High_Low
BRD:BRD-K30577245-341-01-9	ACH-000155	-2.37239	DOCETAXEL	2.5	SW1990_PANCREAS	Male	PANCREAS	Pancreas	Pancreatic Carcinoma	Pancreatic adenocarcinoma	0	WT	2.48366	5.33596	2.88574	3.7691	3.58753	3.05674	NA	Low	Low	Low_Low
BRD:BRD-K30577245-341-01-9	ACH-000159	-1.47027	DOCETAXEL	2.5	OSRC2_KIDNEY	Male	KIDNEY	Kidney	Kidney Carcinoma	NA	0	WT	2.90295	4.92524	4.82132	4.13984	NA	3.94947	NA	Low	Low	Low_Low
BRD:BRD-K30577245-341-01-9	ACH-000161	-1.80644	DOCETAXEL	2.5	CORL105_LUNG	Male	LUNG	Lung	Non-Small Cell Lung Carcinoma	Lung Adenocarcinoma	0	WT	3.58439	4.41448	4.44826	2.33705	NA	3.7525	NA	High	Low	High_Low
BRD:BRD-K30577245-341-01-9	ACH-000163	-1.56095	DOCETAXEL	2.5	SW579_THYROID	Unknown	THYROID	NA	NA	NA	2	Mutant	3.12599	6.06776	5.19671	4.0769	NA	NA	NA	High	NA	High_NA
BRD:BRD-K30577245-341-01-9	ACH-000164	0.726822	DOCETAXEL	2.5	PANC1_PANCREAS	Unknown	PANCREAS	NA	NA	NA	2	Mutant	3.07494	5.00676	5.3589	4.68271	NA	NA	NA	Low	NA	Low_NA
BRD:BRD-K30577245-341-01-9	ACH-000169	-2.40344	DOCETAXEL	2.5	RD_SOFT_TISSUE	Female	SOFT_TISSUE	Soft Tissue	Rhabdomyosarcoma	Embryonal rhabdomyosarcoma	2	Mutant	3.63074	5.65149	5.57377	5.07209	4.22686	4.58741	NA	High	High	High_High
BRD:BRD-K30577245-341-01-9	ACH-000171	-2.52737	DOCETAXEL	2.5	VMRCRCZ_KIDNEY	Unknown	KIDNEY	Kidney	Kidney Carcinoma	NA	0	WT	4.77189	2.73162	5.0051	4.44774	NA	3.90681	NA	High	Low	High_Low
BRD:BRD-K30577245-341-01-9	ACH-000172	-3.11594	DOCETAXEL	2.5	TM87_SOFT_TISSUE	Unknown	SOFT_TISSUE	NA	NA	NA	0	WT	3.83607	5.59831	6.34359	4.57402	NA	NA	NA	High	NA	High_NA
BRD:BRD-K30577245-341-01-9	ACH-000174	-3.71498	DOCETAXEL	2.5	CAL62_THYROID	Female	THYROID	Thyroid	Thyroid Gland Carcinoma	Thyroid gland anaplastic carcinoma	2	Mutant	3.54718	5.832	4.69604	4.3088	NA	4.10617	NA	High	Low	High_Low
BRD:BRD-K30577245-341-01-9	ACH-000176	-2.09548	DOCETAXEL	2.5	LOUNH91_LUNG	Female	LUNG	Lung	Non-Small Cell Lung Carcinoma	Squamous Cell Lung Carcinoma	2	Mutant	3.01193	5.5825	4.72984	4.59073	NA	4.07443	NA	Low	High	Low_High
BRD:BRD-K30577245-341-01-9	ACH-000178	-0.349476	DOCETAXEL	2.5	HS766T_PANCREAS	Male	PANCREAS	Pancreas	Pancreatic Carcinoma	Pancreatic adenocarcinoma	0	WT	3.48093	7.01425	4.06923	4.39839	NA	2.72638	NA	High	Low	High_Low
BRD:BRD-K30577245-341-01-9	ACH-000182	-2.79085	DOCETAXEL	2.5	SNU869_BILIARY_TRACT	Unknown	BILIARY_TRACT	NA	NA	NA	0	WT	4.36264	4.22258	4.49033	3.82952	NA	NA	NA	High	NA	High_NA
BRD:BRD-K30577245-341-01-9	ACH-000186	-3.20488	DOCETAXEL	2.5	NCIH2444_LUNG	Male	LUNG	Lung	Non-Small Cell Lung Carcinoma	NA	2	Mutant	2.55237	5.30907	3.6586	3.53757	2.96028	4.63375	NA	Low	High	Low_High
BRD:BRD-K30577245-341-01-9	ACH-000188	-4.221	DOCETAXEL	2.5	SCC25_UPPER_AERODIGESTIVE_TRACT	Male	UPPER_AERODIGESTIVE_TRACT	Head and Neck	Head and Neck Carcinoma	Tongue Squamous Cell Carcinoma	0	WT	1.84739	1.85909	2.76284	3.35381	NA	3.59427	NA	Low	Low	Low_Low
BRD:BRD-K30577245-341-01-9	ACH-000189	-1.72719	DOCETAXEL	2.5	RCC10RGB_KIDNEY	Male	KIDNEY	Kidney	Kidney Carcinoma	NA	0	WT	2.64435	5.59619	4.93834	2.86396	NA	3.70769	NA	Low	Low	Low_Low
BRD:BRD-K30577245-341-01-9	ACH-000191	-2.6333	DOCETAXEL	2.5	BHT101_THYROID	Female	THYROID	Thyroid	Thyroid Gland Carcinoma	Thyroid gland anaplastic carcinoma	2	Mutant	3.0668	5.55131	4.01981	3.05546	2.45814	3.63103	NA	Low	Low	Low_Low
BRD:BRD-K30577245-341-01-9	ACH-000192	-1.83905	DOCETAXEL	2.5	MFE280_ENDOMETRIUM	Female	ENDOMETRIUM	Endometrium	Endometrial Carcinoma	Endometrial adenocarcinoma	0	WT	3.39206	4.40246	5.17939	4.42531	NA	4.57703	NA	Low	Low	Low_Low
BRD:BRD-K30577245-341-01-9	ACH-000200	-2.32721	DOCETAXEL	2.5	NA	Female	NA	Central Nervous System	Glioma	Low Grade Glioma	0	WT	3.14623	4.91384	4.53297	3.90594	NA	4.36371	NA	Low	High	Low_High
BRD:BRD-K30577245-341-01-9	ACH-000201	-2.8224	DOCETAXEL	2.5	A204_SOFT_TISSUE	Female	SOFT_TISSUE	Soft Tissue	Rhabdomyosarcoma	Embryonal rhabdomyosarcoma	0	WT	2.45674	5.74074	4.79383	4.08544	NA	5.28539	NA	Low	High	Low_High
BRD:BRD-K30577245-341-01-9	ACH-000205	-1.24813	DOCETAXEL	2.5	PK59_PANCREAS	Unknown	PANCREAS	NA	NA	NA	0	WT	3.11023	3.57914	3.96955	3.26829	NA	NA	NA	Low	NA	Low_NA
BRD:BRD-K30577245-341-01-9	ACH-000207	-4.63181	DOCETAXEL	2.5	DETROIT562_UPPER_AERODIGESTIVE_TRACT	Female	UPPER_AERODIGESTIVE_TRACT	Head and Neck	Head and Neck Carcinoma	Pharyngeal squamous cell carcinoma	2	Mutant	2.06899	6.1619	3.85129	2.83946	3.63874	4.00417	NA	Low	High	Low_High
BRD:BRD-K30577245-341-01-9	ACH-000209	-2.65814	DOCETAXEL	2.5	SNU1079_BILIARY_TRACT	Unknown	BILIARY_TRACT	NA	NA	NA	0	WT	2.57078	5.58555	3.84861	3.01697	NA	NA	NA	Low	NA	Low_NA
BRD:BRD-K30577245-341-01-9	ACH-000210	-0.2604	DOCETAXEL	2.5	CADOES1_BONE	Female	BONE	Bone	Ewing's Sarcoma	NA	0	WT	3.13069	5.16207	4.53864	3.74913	NA	3.44107	NA	Low	Low	Low_Low
BRD:BRD-K30577245-341-01-9	ACH-000211	-5.13516	DOCETAXEL	2.5	DAOY_CENTRAL_NERVOUS_SYSTEM	Male	CENTRAL_NERVOUS_SYSTEM	Central Nervous System	Other Solid Carcinomas	Medulloblastoma	2	Mutant	3.58439	7.60068	5.16523	4.29695	3.95349	4.05886	NA	High	Low	High_Low
BRD:BRD-K30577245-341-01-9	ACH-000212	-0.876615	DOCETAXEL	2.5	CAL120_BREAST	Female	BREAST	Breast	Breast Carcinoma	NA	0	WT	3.55891	3.83041	3.66466	4.74189	NA	3.42062	1.0141	High	Low	High_Low
BRD:BRD-K30577245-341-01-9	ACH-000213	-3.5991	DOCETAXEL	2.5	HUPT4_PANCREAS	Male	PANCREAS	Pancreas	Pancreatic Carcinoma	Pancreatic adenocarcinoma	2	Mutant	3.46358	5.11818	3.71132	3.55685	2.25856	3.05173	NA	High	Low	High_Low
BRD:BRD-K30577245-341-01-9	ACH-000217	-1.13449	DOCETAXEL	2.5	JHH6_LIVER	Female	LIVER	Liver	Hepatocellular Carcinoma	NA	0	WT	3.27214	4.75558	4.06305	4.92793	NA	4.60451	NA	Low	High	Low_High
BRD:BRD-K30577245-341-01-9	ACH-000219	-2.3968	DOCETAXEL	2.5	A375_SKIN	Female	SKIN	Skin	Melanoma	Cutaneous melanoma	0	WT	3.73491	5.30797	4.23502	4.15132	NA	3.6692	NA	High	Low	High_Low
BRD:BRD-K30577245-341-01-9	ACH-000221	-0.762226	DOCETAXEL	2.5	SNU398_LIVER	Male	LIVER	Liver	Hepatocellular Carcinoma	NA	2	Mutant	4.11718	3.46356	4.58437	4.19876	NA	4.28751	NA	High	High	High_High
BRD:BRD-K30577245-341-01-9	ACH-000222	-4.6721	DOCETAXEL	2.5	ASPC1_PANCREAS	Female	PANCREAS	Pancreas	Pancreatic Carcinoma	Pancreatic ductal adenocarcinoma	0	WT	4.06923	2.45513	3.78944	3.77119	NA	2.8808	NA	High	Low	High_Low
BRD:BRD-K30577245-341-01-9	ACH-000223	-0.733595	DOCETAXEL	2.5	HCC1937_BREAST	Female	BREAST	Breast	Breast Carcinoma	Ductal Breast Carcinoma	2	Mutant	3.35361	4.15222	4.1156	4.81069	NA	3.83084	NA	Low	Low	Low_Low
BRD:BRD-K30577245-341-01-9	ACH-000227	-1.14755	DOCETAXEL	2.5	KPNYN_AUTONOMIC_GANGLIA	Male	AUTONOMIC_GANGLIA	Peripheral Nervous System	Neuroblastoma	NA	0	WT	3.69391	5.84796	4.7634	3.68324	NA	4.3914	NA	Low	Low	Low_Low
BRD:BRD-K30577245-341-01-9	ACH-000228	-4.3868	DOCETAXEL	2.5	BICR31_UPPER_AERODIGESTIVE_TRACT	Male	UPPER_AERODIGESTIVE_TRACT	Head and Neck	Head and Neck Carcinoma	Tongue Squamous Cell Carcinoma	0	WT	2.17741	5.95449	3.77825	2.98962	NA	3.15448	NA	Low	Low	Low_Low
BRD:BRD-K30577245-341-01-9	ACH-000231	-3.25109	DOCETAXEL	2.5	KALS1_CENTRAL_NERVOUS_SYSTEM	Female	CENTRAL_NERVOUS_SYSTEM	Central Nervous System	Glioblastoma	NA	2	Mutant	2.98974	6.2168	4.80859	4.00233	3.62013	4.3294	NA	Low	High	Low_High
BRD:BRD-K30577245-341-01-9	ACH-000232	-3.1632	DOCETAXEL	2.5	U251MG_CENTRAL_NERVOUS_SYSTEM	Male	CENTRAL_NERVOUS_SYSTEM	Central Nervous System	Glioma	Low Grade Glioma	2	Mutant	3.33604	6.26841	5.36776	4.41501	3.29077	5.0567	NA	Low	High	Low_High
BRD:BRD-K30577245-341-01-9	ACH-000234	-2.53795	DOCETAXEL	2.5	NA	Unknown	NA	NA	NA	NA	0	WT	3.3855	5.22501	4.71177	3.66213	NA	NA	NA	High	NA	High_NA
BRD:BRD-K30577245-341-01-9	ACH-000235	-3.91559	DOCETAXEL	2.5	PANC0403_PANCREAS	Male	PANCREAS	Pancreas	Pancreatic Carcinoma	Pancreatic ductal adenocarcinoma	2	Mutant	3.05533	4.90859	4.23294	3.57588	NA	3.72031	NA	Low	High	Low_High
BRD:BRD-K30577245-341-01-9	ACH-000237	-3.88242	DOCETAXEL	2.5	JHOM1_OVARY	Female	OVARY	NA	NA	NA	1	Mutant	3.10864	4.88008	5.36153	3.82247	NA	NA	NA	Low	NA	Low_NA
BRD:BRD-K30577245-341-01-9	ACH-000242	-2.76607	DOCETAXEL	2.5	RT4_URINARY_TRACT	Male	URINARY_TRACT	Bladder	Bladder Carcinoma	NA	0	WT	3.9657	5.3065	4.55049	4.04837	NA	3.99636	NA	High	Low	High_Low
BRD:BRD-K30577245-341-01-9	ACH-000243	-3.78381	DOCETAXEL	2.5	DANG_PANCREAS	Female	PANCREAS	Pancreas	Pancreatic Carcinoma	Pancreatic adenocarcinoma	0	WT	2.99146	3.26446	4.3412	5.16326	NA	2.91622	0.8478	Low	Low	Low_Low
BRD:BRD-K30577245-341-01-9	ACH-000244	-1.47425	DOCETAXEL	2.5	DKMG_CENTRAL_NERVOUS_SYSTEM	Female	CENTRAL_NERVOUS_SYSTEM	Central Nervous System	Glioblastoma	NA	0	WT	3.25644	5.21021	5.35296	3.47954	NA	4.82401	NA	Low	High	Low_High
BRD:BRD-K30577245-341-01-9	ACH-000249	-2.18088	DOCETAXEL	2.5	CL11_LARGE_INTESTINE	Male	LARGE_INTESTINE	Large Intestine	Colorectal Carcinoma	Colon adenocarcinoma	2	Mutant	3.2693	4.09166	4.64414	3.8042	NA	4.7061	NA	Low	High	Low_High
BRD:BRD-K30577245-341-01-9	ACH-000250	-2.9546	DOCETAXEL	2.5	KMRC20_KIDNEY	Unknown	KIDNEY	Kidney	Kidney Carcinoma	Clear cell renal cell carcinoma	0	WT	3.42057	2.39009	5.05824	4.41156	NA	4.5255	NA	Low	High	Low_High
BRD:BRD-K30577245-341-01-9	ACH-000252	-0.716818	DOCETAXEL	2.5	LS1034_LARGE_INTESTINE	Male	LARGE_INTESTINE	Large Intestine	Colorectal Carcinoma	Cecum adenocarcinoma	2	Mutant	3.30721	6.27806	4.63301	3.50821	NA	4.07431	NA	Low	High	Low_High
BRD:BRD-K30577245-341-01-9	ACH-000255	-5.53075	DOCETAXEL	2.5	LMSU_STOMACH	Unknown	STOMACH	NA	NA	NA	2	Mutant	2.86601	6.41357	4.46974	4.04313	NA	NA	NA	Low	NA	Low_NA
BRD:BRD-K30577245-341-01-9	ACH-000256	-4.23532	DOCETAXEL	2.5	COV318_OVARY	Female	OVARY	NA	NA	NA	2	Mutant	3.3086	4.63885	3.87692	4.30437	NA	NA	NA	High	NA	High_NA
BRD:BRD-K30577245-341-01-9	ACH-000259	-2.5107	DOCETAXEL	2.5	KELLY_AUTONOMIC_GANGLIA	Female	AUTONOMIC_GANGLIA	Peripheral Nervous System	Neuroblastoma	NA	0	WT	3.7555	4.93138	5.21384	4.41777	NA	5.01452	NA	Low	High	Low_High
BRD:BRD-K30577245-341-01-9	ACH-000260	-2.6061	DOCETAXEL	2.5	SKNAS_AUTONOMIC_GANGLIA	Female	AUTONOMIC_GANGLIA	Peripheral Nervous System	Neuroblastoma	NA	0	WT	3.57979	4.29195	5.45801	2.95826	NA	4.45208	NA	Low	Low	Low_Low
BRD:BRD-K30577245-341-01-9	ACH-000261	-5.39585	DOCETAXEL	2.5	RERFLCAI_LUNG	Unknown	LUNG	NA	NA	NA	2	Mutant	3.7606	3.59299	4.5187	4.96173	NA	NA	NA	High	NA	High_NA
BRD:BRD-K30577245-341-01-9	ACH-000264	-3.60997	DOCETAXEL	2.5	CALU6_LUNG	Female	LUNG	Lung	Non-Small Cell Lung Carcinoma	Lung adenocarcinoma	2	Mutant	3.80378	3.47229	5.49578	3.33598	NA	5.27637	NA	High	High	High_High
BRD:BRD-K30577245-341-01-9	ACH-000265	-1.20229	DOCETAXEL	2.5	KP4_PANCREAS	Male	PANCREAS	Pancreas	Pancreatic Carcinoma	NA	0	WT	3.55188	1.37861	5.09475	4.51572	NA	4.26291	NA	High	High	High_High
BRD:BRD-K30577245-341-01-9	ACH-000266	-0.493594	DOCETAXEL	2.5	SNU213_PANCREAS	Unknown	PANCREAS	NA	NA	NA	2	Mutant	2.70819	5.57944	3.7651	3.4745	NA	NA	NA	Low	NA	Low_NA
BRD:BRD-K30577245-341-01-9	ACH-000268	-3.55504	DOCETAXEL	2.5	SNU245_BILIARY_TRACT	Unknown	BILIARY_TRACT	NA	NA	NA	2	Mutant	4.04675	6.03803	3.89435	3.23478	NA	NA	NA	High	NA	High_NA
BRD:BRD-K30577245-341-01-9	ACH-000270	-0.224472	DOCETAXEL	2.5	HPAC_PANCREAS	Female	PANCREAS	Pancreas	Pancreatic Carcinoma	Pancreatic adenocarcinoma	0	WT	3.52223	3.4982	3.96955	4.09816	NA	4.71169	NA	High	High	High_High
BRD:BRD-K30577245-341-01-9	ACH-000273	-4.35983	DOCETAXEL	2.5	SF539_CENTRAL_NERVOUS_SYSTEM	Female	CENTRAL_NERVOUS_SYSTEM	Central Nervous System	Glioblastoma	NA	0	WT	2.64652	4.02338	5.11384	4.0536	NA	2.89057	NA	Low	Low	Low_Low
BRD:BRD-K30577245-341-01-9	ACH-000274	-1.7938	DOCETAXEL	2.5	HS852T_SKIN	Unknown	SKIN	NA	NA	NA	0	WT	3.01193	4.44475	4.50603	3.29827	NA	NA	NA	Low	NA	Low_NA
BRD:BRD-K30577245-341-01-9	ACH-000276	-1.28121	DOCETAXEL	2.5	HCC38_BREAST	Female	BREAST	Breast	Breast Carcinoma	Ductal Breast Carcinoma	2	Mutant	3.37759	5.11484	5.33533	4.3315	3.1085	4.71238	NA	Low	High	Low_High
BRD:BRD-K30577245-341-01-9	ACH-000277	0.187897	DOCETAXEL	2.5	HCC1419_BREAST	Female	BREAST	Breast	Breast Carcinoma	Ductal Breast Carcinoma	1	Mutant	4.07747	4.1419	3.98431	3.1202	NA	3.27915	NA	High	Low	High_Low
BRD:BRD-K30577245-341-01-9	ACH-000278	-1.95899	DOCETAXEL	2.5	COV362_OVARY	Female	OVARY	NA	NA	NA	2	Mutant	2.93007	5.92095	4.25427	2.48943	NA	NA	NA	Low	NA	Low_NA
BRD:BRD-K30577245-341-01-9	ACH-000279	-4.89546	DOCETAXEL	2.5	EWS502_BONE	Unknown	BONE	NA	NA	NA	2	Mutant	3.99206	6.72125	4.87304	4.58394	NA	NA	NA	High	NA	High_NA
BRD:BRD-K30577245-341-01-9	ACH-000280	-2.02689	DOCETAXEL	2.5	SNU840_OVARY	Female	OVARY	NA	NA	NA	0	WT	3.23038	4.01126	4.67911	4.03611	NA	NA	NA	Low	NA	Low_NA
BRD:BRD-K30577245-341-01-9	ACH-000281	-1.52946	DOCETAXEL	2.5	KP2_PANCREAS	Female	PANCREAS	Pancreas	Pancreatic Carcinoma	NA	2	Mutant	3.59583	5.23236	4.17145	5.12665	NA	3.80566	NA	High	High	High_High
BRD:BRD-K30577245-341-01-9	ACH-000288	-3.46036	DOCETAXEL	2.5	BT549_BREAST	Female	BREAST	Breast	Breast Carcinoma	Invasive Ductal Carcinoma of No Special Type	2	Mutant	2.97938	7.04794	4.53751	4.57153	4.05182	3.87587	NA	Low	Low	Low_Low
BRD:BRD-K30577245-341-01-9	ACH-000289	-1.00433	DOCETAXEL	2.5	SNU466_CENTRAL_NERVOUS_SYSTEM	Unknown	CENTRAL_NERVOUS_SYSTEM	NA	NA	NA	0	WT	3.38287	5.30944	4.11934	2.7971	NA	NA	NA	High	NA	High_NA
BRD:BRD-K30577245-341-01-9	ACH-000291	-1.43465	DOCETAXEL	2.5	NA	Female	NA	Ovary	Ovarian Carcinoma	Ovarian adenocarcinoma	2	Mutant	3.21718	4.91098	3.47708	3.81843	NA	3.03941	NA	Low	Low	Low_Low
BRD:BRD-K30577245-341-01-9	ACH-000292	-4.86738	DOCETAXEL	2.5	NCIH841_LUNG	Unknown	LUNG	NA	NA	NA	2	Mutant	3.56124	7.14276	5.47274	5.21352	NA	NA	NA	High	NA	High_NA
BRD:BRD-K30577245-341-01-9	ACH-000296	-2.33237	DOCETAXEL	2.5	OUMS23_LARGE_INTESTINE	Unknown	LARGE_INTESTINE	NA	NA	NA	2	Mutant	3.51262	6.01689	4.77458	5.33248	NA	NA	NA	Low	NA	Low_NA
BRD:BRD-K30577245-341-01-9	ACH-000302	-0.53259	DOCETAXEL	2.5	SNU1077_ENDOMETRIUM	Female	ENDOMETRIUM	NA	NA	NA	2	Mutant	3.08142	5.0518	4.05606	3.75967	NA	NA	NA	Low	NA	Low_NA
BRD:BRD-K30577245-341-01-9	ACH-000305	-1.38327	DOCETAXEL	2.5	ECGI10_OESOPHAGUS	Male	OESOPHAGUS	Esophagus	Esophageal Carcinoma	Esophageal Squamous Cell Carcinoma	2	Mutant	2.91205	6.45621	4.78038	3.22147	4.06244	3.84001	NA	Low	Low	Low_Low
BRD:BRD-K30577245-341-01-9	ACH-000307	-4.71745	DOCETAXEL	2.5	PK1_PANCREAS	Unknown	PANCREAS	NA	NA	NA	2	Mutant	3.05204	4.98599	5.1053	4.02729	NA	NA	NA	Low	NA	Low_NA
BRD:BRD-K30577245-341-01-9	ACH-000308	-1.12494	DOCETAXEL	2.5	EFO21_OVARY	Female	OVARY	Ovary	Ovarian Carcinoma	Ovarian Cystadenocarcinoma	0	WT	3.13848	7.03288	4.45485	5.56959	3.90798	4.42694	1.77425	Low	High	Low_High
BRD:BRD-K30577245-341-01-9	ACH-000309	-2.34862	DOCETAXEL	2.5	SKLU1_LUNG	Female	LUNG	Lung	Non-Small Cell Lung Carcinoma	Lung Adenocarcinoma	2	Mutant	NA	NA	NA	NA	NA	5.17448	NA	NA	High	NA_High
BRD:BRD-K30577245-341-01-9	ACH-000311	-3.38306	DOCETAXEL	2.5	NCIH2122_LUNG	Female	LUNG	Lung	Non-Small Cell Lung Carcinoma	Lung Adenocarcinoma	1	Mutant	3.32101	5.04962	3.41655	3.44648	-1.23094	3.66073	NA	Low	Low	Low_Low
BRD:BRD-K30577245-341-01-9	ACH-000312	-2.89711	DOCETAXEL	2.5	SKNBE2_AUTONOMIC_GANGLIA	Unknown	AUTONOMIC_GANGLIA	NA	NA	NA	2	Mutant	3.99727	6.07306	5.39663	3.8925	NA	NA	NA	High	NA	High_NA
BRD:BRD-K30577245-341-01-9	ACH-000313	-1.66029	DOCETAXEL	2.5	KMRC3_KIDNEY	Unknown	KIDNEY	NA	NA	NA	1	Mutant	3.71508	5.36485	5.38534	3.85442	NA	NA	NA	High	NA	High_NA
BRD:BRD-K30577245-341-01-9	ACH-000316	-4.96966	DOCETAXEL	2.5	SNU886_LIVER	Unknown	LIVER	NA	NA	NA	0	WT	3.51623	1.51731	5.11925	3.55085	NA	NA	NA	Low	NA	Low_NA
BRD:BRD-K30577245-341-01-9	ACH-000318	-0.747217	DOCETAXEL	2.5	TE10_OESOPHAGUS	Male	OESOPHAGUS	Esophagus	Esophageal Carcinoma	Esophageal Squamous Cell Carcinoma	2	Mutant	3.51382	4.83101	4.13863	2.83756	3.2845	4.38894	NA	High	High	High_High
BRD:BRD-K30577245-341-01-9	ACH-000319	-1.64062	DOCETAXEL	2.5	MPP89_PLEURA	Male	PLEURA	Lung	Mesothelioma	Pleural Epithelioid Mesothelioma	0	WT	3.29608	1.98805	4.52214	2.90273	NA	4.00016	NA	High	Low	High_Low
BRD:BRD-K30577245-341-01-9	ACH-000320	-1.59516	DOCETAXEL	2.5	PSN1_PANCREAS	Male	PANCREAS	Pancreas	Pancreatic Carcinoma	Pancreatic adenocarcinoma	2	Mutant	4.29405	3.66145	4.9757	4.04488	2.47997	4.0774	NA	High	High	High_High
BRD:BRD-K30577245-341-01-9	ACH-000322	-2.598	DOCETAXEL	2.5	HT144_SKIN	Male	SKIN	Skin	Melanoma	NA	0	WT	3.37495	5.36025	4.30861	3.04384	NA	4.18221	NA	Low	High	Low_High
BRD:BRD-K30577245-341-01-9	ACH-000323	-1.12398	DOCETAXEL	2.5	42MGBA_CENTRAL_NERVOUS_SYSTEM	Male	CENTRAL_NERVOUS_SYSTEM	Central Nervous System	Glioblastoma	NA	2	Mutant	2.93722	4.95384	5.42211	4.17883	NA	3.92478	NA	Low	Low	Low_Low
BRD:BRD-K30577245-341-01-9	ACH-000324	-2.67756	DOCETAXEL	2.5	JHOC5_OVARY	Female	OVARY	NA	NA	NA	0	WT	2.3358	4.96079	4.08077	4.14477	NA	NA	NA	Low	NA	Low_NA
BRD:BRD-K30577245-341-01-9	ACH-000329	-3.39404	DOCETAXEL	2.5	CCFSTTG1_CENTRAL_NERVOUS_SYSTEM	Unknown	CENTRAL_NERVOUS_SYSTEM	NA	NA	NA	0	WT	3.20237	4.48144	4.77361	4.15539	NA	NA	NA	Low	NA	Low_NA
BRD:BRD-K30577245-341-01-9	ACH-000330	-1.92014	DOCETAXEL	2.5	EFM19_BREAST	Female	BREAST	Breast	Breast Carcinoma	Ductal Breast Carcinoma	2	Mutant	4.30465	5.10059	4.41238	3.53636	NA	4.34296	NA	High	High	High_High
BRD:BRD-K30577245-341-01-9	ACH-000331	-1.26876	DOCETAXEL	2.5	ISTMES2_PLEURA	Unknown	PLEURA	NA	NA	NA	2	Mutant	3.15548	5.18055	4.95949	3.46183	NA	NA	NA	Low	NA	Low_NA
BRD:BRD-K30577245-341-01-9	ACH-000332	-0.721702	DOCETAXEL	2.5	YAPC_PANCREAS	Male	PANCREAS	Pancreas	Pancreatic Carcinoma	NA	2	Mutant	3.8921	5.93068	4.48447	5.61608	2.16123	4.36624	1.49758	High	High	High_High
BRD:BRD-K30577245-341-01-9	ACH-000335	-3.40986	DOCETAXEL	2.5	MSTO211H_PLEURA	Male	PLEURA	Lung	Mesothelioma	Pleural Biphasic Mesothelioma	0	WT	3.16008	4.83101	4.59967	4.31836	NA	3.81144	0.60081	High	Low	High_Low
BRD:BRD-K30577245-341-01-9	ACH-000343	-2.97769	DOCETAXEL	2.5	NCIH522_LUNG	Male	LUNG	Lung	Non-Small Cell Lung Carcinoma	Lung Adenocarcinoma	0	WT	4.63219	1.77681	5.17493	4.70517	NA	3.85626	NA	High	Low	High_Low
BRD:BRD-K30577245-341-01-9	ACH-000344	-0.556476	DOCETAXEL	2.5	SNU668_STOMACH	Unknown	STOMACH	NA	NA	NA	2	Mutant	3.80575	4.52715	3.99246	3.61557	NA	NA	NA	High	NA	High_NA
BRD:BRD-K30577245-341-01-9	ACH-000347	-0.451746	DOCETAXEL	2.5	QGP1_PANCREAS	Male	PANCREAS	Pancreas	Other Solid Carcinomas	Pancreatic somatostatinoma	0	WT	4.18821	3.63376	5.83771	4.02552	NA	5.81586	NA	High	High	High_High
BRD:BRD-K30577245-341-01-9	ACH-000348	-2.98451	DOCETAXEL	2.5	RPMI7951_SKIN	Female	SKIN	Skin	Melanoma	NA	0	WT	3.83413	3.39179	5.17158	4.11747	NA	3.964	NA	High	High	High_High
BRD:BRD-K30577245-341-01-9	ACH-000350	-1.82473	DOCETAXEL	2.5	COLO678_LARGE_INTESTINE	Male	LARGE_INTESTINE	Large Intestine	Colorectal Carcinoma	NA	0	WT	3.1979	5.65674	4.99173	3.2274	NA	4.43883	NA	Low	High	Low_High
BRD:BRD-K30577245-341-01-9	ACH-000351	-4.06215	DOCETAXEL	2.5	MKN1_STOMACH	Unknown	STOMACH	NA	NA	NA	2	Mutant	3.67567	6.23888	4.04669	4.32202	NA	NA	NA	Low	NA	Low_NA
BRD:BRD-K30577245-341-01-9	ACH-000352	-2.68709	DOCETAXEL	2.5	HCC1428_BREAST	Female	BREAST	Breast	Breast Carcinoma	Breast adenocarcinoma	0	WT	3.93344	6.3973	3.9513	4.21921	NA	3.48564	NA	High	Low	High_Low
BRD:BRD-K30577245-341-01-9	ACH-000356	-2.64101	DOCETAXEL	2.5	MKN45_STOMACH	Female	STOMACH	Stomach	Gastric Carcinoma	Gastric adenocarcinoma	1	Mutant	4.28051	5.45765	3.9679	4.08544	NA	3.31351	NA	High	Low	High_Low
BRD:BRD-K30577245-341-01-9	ACH-000359	-0.721682	DOCETAXEL	2.5	MG63_BONE	Male	BONE	Bone	Osteosarcoma	NA	0	WT	2.25873	2.22547	4.82085	3.84052	NA	4.12352	NA	Low	High	Low_High
BRD:BRD-K30577245-341-01-9	ACH-000361	-3.54423	DOCETAXEL	2.5	SKHEP1_LIVER	Male	LIVER	Liver	Hepatocellular Carcinoma	NA	0	WT	3.04377	5.63977	4.40188	3.76492	NA	4.57757	NA	Low	High	Low_High
BRD:BRD-K30577245-341-01-9	ACH-000364	-3.92483	DOCETAXEL	2.5	U2OS_BONE	Female	BONE	Bone	Osteosarcoma	NA	0	WT	3.93163	4.75982	4.99299	4.9525	NA	3.96255	NA	Low	Low	Low_Low
BRD:BRD-K30577245-341-01-9	ACH-000366	-1.84586	DOCETAXEL	2.5	SKNDZ_AUTONOMIC_GANGLIA	Female	AUTONOMIC_GANGLIA	Peripheral Nervous System	Neuroblastoma	NA	2	Mutant	3.96924	6.96268	5.49518	3.82146	3.78907	4.65571	NA	High	Low	High_Low
BRD:BRD-K30577245-341-01-9	ACH-000367	-1.16436	DOCETAXEL	2.5	NCIH226_LUNG	Male	LUNG	Lung	Mesothelioma	Pleural Epithelioid Mesothelioma	0	WT	2.45427	6.30646	2.86194	3.53029	NA	2.8974	NA	Low	Low	Low_Low
BRD:BRD-K30577245-341-01-9	ACH-000368	-3.6812	DOCETAXEL	2.5	SNU1105_CENTRAL_NERVOUS_SYSTEM	Unknown	CENTRAL_NERVOUS_SYSTEM	NA	NA	NA	2	Mutant	2.36501	5.25267	4.81991	3.83853	NA	NA	NA	Low	NA	Low_NA
BRD:BRD-K30577245-341-01-9	ACH-000374	-2.78697	DOCETAXEL	2.5	HCC1143_BREAST	Female	BREAST	Breast	Breast Carcinoma	Ductal Breast Carcinoma	2	Mutant	3.22892	7.30122	4.80622	2.69004	4.70194	4.09901	NA	Low	High	Low_High
BRD:BRD-K30577245-341-01-9	ACH-000375	-2.14711	DOCETAXEL	2.5	G402_SOFT_TISSUE	Female	SOFT_TISSUE	Soft Tissue	Other Sarcomas	Epithelioid Cell Type Gastrointestinal Stromal Tumor	0	WT	3.546	5.64418	5.02412	4.33223	NA	4.41025	NA	Low	Low	Low_Low
BRD:BRD-K30577245-341-01-9	ACH-000376	-1.47802	DOCETAXEL	2.5	SF295_CENTRAL_NERVOUS_SYSTEM	Female	CENTRAL_NERVOUS_SYSTEM	Central Nervous System	Glioblastoma	NA	2	Mutant	3.02206	5.47745	4.36678	4.17883	4.06302	3.92227	NA	Low	Low	Low_Low
BRD:BRD-K30577245-341-01-9	ACH-000378	-2.76333	DOCETAXEL	2.5	NCIH647_LUNG	Male	LUNG	Lung	Non-Small Cell Lung Carcinoma	Adenosquamous lung carcinoma	0	WT	3.24492	5.52994	4.04747	4.59503	NA	3.59194	NA	Low	Low	Low_Low
BRD:BRD-K30577245-341-01-9	ACH-000383	-2.27093	DOCETAXEL	2.5	OE33_OESOPHAGUS	Female	OESOPHAGUS	Esophagus	Esophageal Carcinoma	Barrett Adenocarcinoma	2	Mutant	3.59355	4.68841	3.78386	3.80011	NA	4.05444	NA	High	Low	High_Low
BRD:BRD-K30577245-341-01-9	ACH-000384	-1.8459	DOCETAXEL	2.5	SW780_URINARY_TRACT	Female	URINARY_TRACT	Bladder	Bladder Carcinoma	NA	0	WT	4.48032	5.54412	6.00031	4.05707	NA	4.25563	NA	High	High	High_High
BRD:BRD-K30577245-341-01-9	ACH-000389	-3.46623	DOCETAXEL	2.5	H4_CENTRAL_NERVOUS_SYSTEM	Male	CENTRAL_NERVOUS_SYSTEM	Central Nervous System	Glioma	Low Grade Glioma	0	WT	3.16772	5.58555	5.43061	4.61515	NA	4.39757	NA	Low	High	Low_High
BRD:BRD-K30577245-341-01-9	ACH-000390	-1.53534	DOCETAXEL	2.5	LUDLU1_LUNG	Unknown	LUNG	NA	NA	NA	2	Mutant	3.50415	5.34386	4.6051	4.70745	NA	NA	NA	High	NA	High_NA
BRD:BRD-K30577245-341-01-9	ACH-000391	-4.40726	DOCETAXEL	2.5	MHHES1_BONE	Male	BONE	Bone	Ewing's Sarcoma	NA	0	WT	3.66266	6.1323	4.57611	5.54048	2.63306	4.04674	NA	Low	High	Low_High
BRD:BRD-K30577245-341-01-9	ACH-000393	-2.86495	DOCETAXEL	2.5	HLF_LIVER	Unknown	LIVER	NA	NA	NA	2	Mutant	2.91928	5.26857	4.31124	4.71201	NA	NA	NA	Low	NA	Low_NA
BRD:BRD-K30577245-341-01-9	ACH-000395	-2.81579	DOCETAXEL	2.5	NCIH520_LUNG	Male	LUNG	Lung	Non-Small Cell Lung Carcinoma	Squamous Cell Lung Carcinoma	2	Mutant	4.21913	3.16402	4.44163	7.4675	NA	3.71257	NA	High	Low	High_Low
BRD:BRD-K30577245-341-01-9	ACH-000396	-4.66353	DOCETAXEL	2.5	J82_URINARY_TRACT	Male	URINARY_TRACT	Bladder	Bladder Carcinoma	NA	1	Mutant	2.45674	4.25545	4.67187	2.64334	NA	3.49803	NA	Low	Low	Low_Low
BRD:BRD-K30577245-341-01-9	ACH-000397	-3.05499	DOCETAXEL	2.5	TEN_ENDOMETRIUM	Female	ENDOMETRIUM	NA	NA	NA	2	Mutant	4.05845	3.38389	5.15018	4.87041	NA	NA	NA	High	NA	High_NA
BRD:BRD-K30577245-341-01-9	ACH-000401	-3.84445	DOCETAXEL	2.5	COLO800_SKIN	Male	SKIN	Skin	Melanoma	Cutaneous melanoma	2	Mutant	2.92109	6.00332	4.64361	3.38621	NA	3.77155	NA	Low	High	Low_High
BRD:BRD-K30577245-341-01-9	ACH-000403	0.0243937	DOCETAXEL	2.5	NCIH747_LARGE_INTESTINE	Male	LARGE_INTESTINE	Large Intestine	Colorectal Carcinoma	Cecum adenocarcinoma	2	Mutant	3.44602	6.03713	3.56141	4.28651	2.92282	3.8096	NA	Low	Low	Low_Low
BRD:BRD-K30577245-341-01-9	ACH-000404	-2.61373	DOCETAXEL	2.5	K029AX_SKIN	Unknown	SKIN	NA	NA	NA	0	WT	3.17381	4.50415	4.73979	4.09816	NA	NA	NA	Low	NA	Low_NA
BRD:BRD-K30577245-341-01-9	ACH-000407	-3.2378	DOCETAXEL	2.5	SNU685_ENDOMETRIUM	Female	ENDOMETRIUM	NA	NA	NA	0	WT	3.2636	4.06505	4.50718	4.3844	NA	NA	NA	Low	NA	Low_NA
BRD:BRD-K30577245-341-01-9	ACH-000408	-4.43836	DOCETAXEL	2.5	TE5_OESOPHAGUS	Female	OESOPHAGUS	Esophagus	Esophageal Carcinoma	Esophageal Squamous Cell Carcinoma	2	Mutant	4.33117	4.8703	4.16928	5.45185	3.18719	3.44245	NA	High	Low	High_Low
BRD:BRD-K30577245-341-01-9	ACH-000411	-2.52906	DOCETAXEL	2.5	769P_KIDNEY	Female	KIDNEY	Kidney	Kidney Carcinoma	Clear Cell Renal Cell Carcinoma	0	WT	2.18039	5.26593	4.09221	2.26727	NA	3.67798	NA	Low	Low	Low_Low
BRD:BRD-K30577245-341-01-9	ACH-000414	-2.0484	DOCETAXEL	2.5	NCIH1944_LUNG	Female	LUNG	Lung	Non-Small Cell Lung Carcinoma	Lung Adenocarcinoma	0	WT	3.17533	4.37473	3.29544	3.58296	NA	3.0982	NA	Low	Low	Low_Low
BRD:BRD-K30577245-341-01-9	ACH-000415	-3.34746	DOCETAXEL	2.5	BICR6_UPPER_AERODIGESTIVE_TRACT	Unknown	UPPER_AERODIGESTIVE_TRACT	NA	NA	NA	2	Mutant	1.74287	1.47092	1.88913	1.97518	NA	NA	NA	Low	NA	Low_NA
BRD:BRD-K30577245-341-01-9	ACH-000416	-1.94169	DOCETAXEL	2.5	NCIH838_LUNG	Male	LUNG	Lung	Non-Small Cell Lung Carcinoma	Lung Adenocarcinoma	2	Mutant	2.46659	3.19277	3.94713	4.11747	NA	5.18992	NA	Low	High	Low_High
BRD:BRD-K30577245-341-01-9	ACH-000417	-1.4402	DOCETAXEL	2.5	PANC0813_PANCREAS	Male	PANCREAS	Pancreas	Pancreatic Carcinoma	Pancreatic ductal adenocarcinoma	0	WT	3.33468	6.49267	4.5964	4.07775	NA	3.89698	NA	Low	High	Low_High
BRD:BRD-K30577245-341-01-9	ACH-000418	-1.67729	DOCETAXEL	2.5	SW1353_BONE	Unknown	BONE	NA	NA	NA	0	WT	3.26217	4.95569	5.00801	5.22951	NA	NA	NA	Low	NA	Low_NA
BRD:BRD-K30577245-341-01-9	ACH-000420	-2.01691	DOCETAXEL	2.5	SNU449_LIVER	Male	LIVER	Liver	Hepatocellular Carcinoma	NA	2	Mutant	3.00854	5.41214	4.70975	4.09816	2.12237	3.59821	NA	Low	Low	Low_Low
BRD:BRD-K30577245-341-01-9	ACH-000421	-3.60122	DOCETAXEL	2.5	SW837_LARGE_INTESTINE	Male	LARGE_INTESTINE	Large Intestine	Colorectal Carcinoma	Rectal adenocarcinoma	2	Mutant	4.0358	6.00148	5.24363	5.59301	3.01892	4.28851	1.97672	High	High	High_High
BRD:BRD-K30577245-341-01-9	ACH-000423	-3.13428	DOCETAXEL	2.5	SKMEL3_SKIN	Female	SKIN	Skin	Melanoma	Cutaneous melanoma	2	Mutant	3.52821	5.16893	4.49558	4.04313	3.34951	3.47774	NA	High	Low	High_Low
BRD:BRD-K30577245-341-01-9	ACH-000425	-4.03204	DOCETAXEL	2.5	UACC62_SKIN	Unknown	SKIN	Skin	Melanoma	NA	0	WT	2.67448	3.83531	4.14965	3.69204	NA	3.48894	NA	Low	Low	Low_Low
BRD:BRD-K30577245-341-01-9	ACH-000427	-1.54267	DOCETAXEL	2.5	NCIN87_STOMACH	Male	STOMACH	Stomach	Gastric Carcinoma	Gastric tubular adenocarcinoma	2	Mutant	3.47723	5.4008	4.52443	4.24402	4.14384	3.81968	NA	Low	High	Low_High
BRD:BRD-K30577245-341-01-9	ACH-000428	-0.561059	DOCETAXEL	2.5	UO31_KIDNEY	Female	KIDNEY	Kidney	Kidney Carcinoma	NA	0	WT	2.76336	6.28554	3.5668	4.11664	NA	3.45979	NA	Low	Low	Low_Low
BRD:BRD-K30577245-341-01-9	ACH-000429	0.189283	DOCETAXEL	2.5	A704_KIDNEY	Male	KIDNEY	Kidney	Kidney Carcinoma	NA	0	WT	4.53792	3.48715	3.57002	3.31514	NA	4.04275	NA	High	High	High_High
BRD:BRD-K30577245-341-01-9	ACH-000430	-3.23545	DOCETAXEL	2.5	TYKNU_OVARY	Female	OVARY	Ovary	Ovarian Carcinoma	High grade ovarian serous adenocarcinoma	2	Mutant	3.08465	4.75028	4.43498	4.20429	2.55307	4.29133	2.11942	Low	High	Low_High
BRD:BRD-K30577245-341-01-9	ACH-000433	-0.956184	DOCETAXEL	2.5	CAKI1_KIDNEY	Male	KIDNEY	Kidney	Kidney Carcinoma	Clear cell renal cell carcinoma	0	WT	2.36764	4.16012	3.74993	2.71905	NA	4.64807	NA	Low	High	Low_High
BRD:BRD-K30577245-341-01-9	ACH-000434	-2.42335	DOCETAXEL	2.5	NCIH1915_LUNG	Female	LUNG	Lung	Non-Small Cell Lung Carcinoma	NA	0	WT	2.98802	2.97028	3.78479	4.46451	NA	4.04027	1.03288	Low	High	Low_High
BRD:BRD-K30577245-341-01-9	ACH-000435	-1.99959	DOCETAXEL	2.5	EFE184_ENDOMETRIUM	Female	ENDOMETRIUM	NA	NA	NA	2	Mutant	2.11954	5.38206	2.73329	3.28264	NA	NA	NA	Low	NA	Low_NA
BRD:BRD-K30577245-341-01-9	ACH-000437	-1.85788	DOCETAXEL	2.5	SW1088_CENTRAL_NERVOUS_SYSTEM	Male	CENTRAL_NERVOUS_SYSTEM	Central Nervous System	Glioma	Low Grade Glioma	2	Mutant	3.65173	5.70708	4.94268	4.41501	4.08575	3.61506	NA	High	Low	High_Low
BRD:BRD-K30577245-341-01-9	ACH-000441	-0.469133	DOCETAXEL	2.5	SH4_SKIN	Female	SKIN	Skin	Melanoma	NA	0	WT	3.60379	3.99991	4.58052	3.57706	NA	4.3888	NA	High	High	High_High
BRD:BRD-K30577245-341-01-9	ACH-000443	-0.468899	DOCETAXEL	2.5	OVKATE_OVARY	Female	OVARY	Ovary	Ovarian Carcinoma	High grade ovarian serous adenocarcinoma	2	Mutant	3.04543	4.77192	5.11384	3.87504	NA	4.44498	NA	Low	High	Low_High
BRD:BRD-K30577245-341-01-9	ACH-000444	-2.22701	DOCETAXEL	2.5	LU99_LUNG	Unknown	LUNG	NA	NA	NA	0	WT	3.00684	4.04648	5.14716	3.34972	NA	NA	NA	Low	NA	Low_NA
BRD:BRD-K30577245-341-01-9	ACH-000445	-5.08532	DOCETAXEL	2.5	KNS60_CENTRAL_NERVOUS_SYSTEM	Unknown	CENTRAL_NERVOUS_SYSTEM	NA	NA	NA	2	Mutant	3.6681	6.34006	4.99383	4.44369	NA	NA	NA	High	NA	High_NA
BRD:BRD-K30577245-341-01-9	ACH-000446	-1.5968	DOCETAXEL	2.5	NA	Unknown	NA	NA	NA	NA	0	WT	3.31137	5.73108	4.73532	3.37549	NA	NA	NA	Low	NA	Low_NA
BRD:BRD-K30577245-341-01-9	ACH-000447	-2.14607	DOCETAXEL	2.5	NCIH2228_LUNG	Female	LUNG	Lung	Non-Small Cell Lung Carcinoma	Lung Adenocarcinoma	2	Mutant	3.1859	3.40356	4.54091	5.19277	NA	4.29162	NA	Low	High	Low_High
BRD:BRD-K30577245-341-01-9	ACH-000449	-2.58895	DOCETAXEL	2.5	MESSA_SOFT_TISSUE	Female	SOFT_TISSUE	Soft Tissue	Other Sarcomas	Uterine Corpus Sarcoma	0	WT	3.24636	6.14623	5.66202	3.85541	NA	5.12099	NA	Low	High	Low_High
BRD:BRD-K30577245-341-01-9	ACH-000450	-1.46014	DOCETAXEL	2.5	MELHO_SKIN	Female	SKIN	Skin	Melanoma	NA	0	WT	3.04377	3.91894	4.54091	3.14224	NA	3.89542	NA	Low	High	Low_High
BRD:BRD-K30577245-341-01-9	ACH-000452	-2.27944	DOCETAXEL	2.5	TE8_OESOPHAGUS	Male	OESOPHAGUS	Esophagus	Esophageal Carcinoma	Esophageal Squamous Cell Carcinoma	2	Mutant	3.25788	5.81245	5.64003	3.69423	2.31101	4.59538	NA	Low	High	Low_High
BRD:BRD-K30577245-341-01-9	ACH-000454	-0.895573	DOCETAXEL	2.5	HCC95_LUNG	Unknown	LUNG	NA	NA	NA	0	WT	3.94877	4.12748	4.83349	5.24614	NA	NA	NA	High	NA	High_NA
BRD:BRD-K30577245-341-01-9	ACH-000456	-5.18103	DOCETAXEL	2.5	BCPAP_THYROID	Female	THYROID	Thyroid	Thyroid Gland Carcinoma	Poorly differentiated thyroid gland carcinoma	2	Mutant	2.98284	6.08689	5.25637	4.52345	4.17263	4.30107	NA	Low	High	Low_High
BRD:BRD-K30577245-341-01-9	ACH-000457	-2.07812	DOCETAXEL	2.5	CAL54_KIDNEY	Male	KIDNEY	Kidney	Kidney Carcinoma	NA	0	WT	3.71927	6.12975	4.92567	3.06041	NA	5.21837	NA	High	High	High_High
BRD:BRD-K30577245-341-01-9	ACH-000458	-4.40549	DOCETAXEL	2.5	CJM_SKIN	Unknown	SKIN	NA	NA	NA	2	Mutant	2.20989	5.0422	4.58821	1.9982	NA	NA	NA	Low	NA	Low_NA
BRD:BRD-K30577245-341-01-9	ACH-000461	-3.49656	DOCETAXEL	2.5	SNU1196_BILIARY_TRACT	Unknown	BILIARY_TRACT	NA	NA	NA	2	Mutant	3.36698	7.25171	3.18331	2.446	NA	NA	NA	Low	NA	Low_NA
BRD:BRD-K30577245-341-01-9	ACH-000463	-2.85527	DOCETAXEL	2.5	NCIH460_LUNG	Male	LUNG	Lung	Non-Small Cell Lung Carcinoma	Lung large cell carcinoma	0	WT	3.24492	4.68174	4.44765	4.07089	NA	3.9823	NA	Low	High	Low_High
BRD:BRD-K30577245-341-01-9	ACH-000464	-1.1306	DOCETAXEL	2.5	CAS1_CENTRAL_NERVOUS_SYSTEM	Male	CENTRAL_NERVOUS_SYSTEM	Central Nervous System	Glioblastoma	NA	2	Mutant	2.50294	5.84796	4.32042	3.85245	4.37285	4.3438	NA	Low	High	Low_High
BRD:BRD-K30577245-341-01-9	ACH-000466	-1.88675	DOCETAXEL	2.5	SNU216_STOMACH	Unknown	STOMACH	NA	NA	NA	2	Mutant	3.42057	6.44402	4.7057	4.41225	NA	NA	NA	Low	NA	Low_NA
BRD:BRD-K30577245-341-01-9	ACH-000467	-4.44376	DOCETAXEL	2.5	HCC56_LARGE_INTESTINE	Unknown	LARGE_INTESTINE	NA	NA	NA	2	Mutant	3.09749	5.6715	5.97771	3.58766	NA	NA	NA	Low	NA	Low_NA
BRD:BRD-K30577245-341-01-9	ACH-000468	-3.5379	DOCETAXEL	2.5	PK45H_PANCREAS	Unknown	PANCREAS	NA	NA	NA	0	WT	3.79845	5.97939	4.66191	4.64448	NA	NA	NA	High	NA	High_NA
BRD:BRD-K30577245-341-01-9	ACH-000469	-3.07884	DOCETAXEL	2.5	YH13_CENTRAL_NERVOUS_SYSTEM	Male	CENTRAL_NERVOUS_SYSTEM	Central Nervous System	Glioblastoma	NA	2	Mutant	3.41414	4.68619	5.04493	4.38017	1.77071	4.48728	NA	High	High	High_High
BRD:BRD-K30577245-341-01-9	ACH-000470	-2.64516	DOCETAXEL	2.5	SW1463_LARGE_INTESTINE	Female	LARGE_INTESTINE	Large Intestine	Colorectal Carcinoma	Rectal adenocarcinoma	2	Mutant	4.01452	5.24733	2.74259	3.2926	4.53223	3.16969	NA	High	Low	High_Low
BRD:BRD-K30577245-341-01-9	ACH-000471	-3.59541	DOCETAXEL	2.5	LI7_LIVER	Unknown	LIVER	NA	NA	NA	0	WT	4.3961	2.72345	4.9496	4.76461	NA	NA	NA	High	NA	High_NA
BRD:BRD-K30577245-341-01-9	ACH-000472	-0.35643	DOCETAXEL	2.5	HSC2_UPPER_AERODIGESTIVE_TRACT	Male	UPPER_AERODIGESTIVE_TRACT	Head and Neck	Head and Neck Carcinoma	Oral Cavity Squamous Cell Carcinoma	0	WT	2.39623	3.49942	3.56357	3.86034	NA	3.30734	NA	Low	Low	Low_Low
BRD:BRD-K30577245-341-01-9	ACH-000473	-3.91025	DOCETAXEL	2.5	RT112_URINARY_TRACT	Female	URINARY_TRACT	Bladder	Bladder Carcinoma	NA	1	Mutant	3.71508	5.42577	4.43316	4.16594	2.21812	4.09127	NA	High	Low	High_Low
BRD:BRD-K30577245-341-01-9	ACH-000475	-1.9944	DOCETAXEL	2.5	HUH1_LIVER	Male	LIVER	Liver	Hepatocellular Carcinoma	NA	2	Mutant	2.92289	5.09511	4.36361	3.26396	NA	3.72977	NA	Low	Low	Low_Low
BRD:BRD-K30577245-341-01-9	ACH-000476	-2.3811	DOCETAXEL	2.5	JHH4_LIVER	Male	LIVER	Liver	Hepatocellular Carcinoma	NA	2	Mutant	3.40638	5.18693	4.96804	3.72031	NA	4.37314	NA	Low	High	Low_High
BRD:BRD-K30577245-341-01-9	ACH-000477	-1.90824	DOCETAXEL	2.5	MALME3M_SKIN	Unknown	SKIN	NA	NA	NA	0	WT	3.5659	5.00855	4.69706	3.04883	NA	NA	NA	High	NA	High_NA
BRD:BRD-K30577245-341-01-9	ACH-000479	-0.858017	DOCETAXEL	2.5	KNS81_CENTRAL_NERVOUS_SYSTEM	Unknown	CENTRAL_NERVOUS_SYSTEM	NA	NA	NA	0	WT	4.10433	6.35147	4.72084	4.35173	NA	NA	NA	High	NA	High_NA
BRD:BRD-K30577245-341-01-9	ACH-000480	-0.520105	DOCETAXEL	2.5	HUH7_LIVER	Male	LIVER	Liver	Hepatocellular Carcinoma	NA	2	Mutant	4.11798	6.23354	3.93452	2.98789	NA	4.01214	NA	High	Low	High_Low
BRD:BRD-K30577245-341-01-9	ACH-000481	-3.25818	DOCETAXEL	2.5	NCIH2170_LUNG	Male	LUNG	Lung	Non-Small Cell Lung Carcinoma	Squamous Cell Lung Carcinoma	2	Mutant	3.63407	5.31127	3.15676	4.0475	NA	3.22341	NA	High	Low	High_Low
BRD:BRD-K30577245-341-01-9	ACH-000482	-2.67833	DOCETAXEL	2.5	RERFLCKJ_LUNG	Male	LUNG	Lung	Non-Small Cell Lung Carcinoma	Lung Adenocarcinoma	0	WT	4.16052	3.90221	5.24647	3.44262	NA	4.78127	NA	High	High	High_High
BRD:BRD-K30577245-341-01-9	ACH-000483	-3.81353	DOCETAXEL	2.5	SNU182_LIVER	Unknown	LIVER	NA	NA	NA	2	Mutant	3.29468	5.05831	4.30729	4.01218	NA	NA	NA	Low	NA	Low_NA
BRD:BRD-K30577245-341-01-9	ACH-000484	-1.4162	DOCETAXEL	2.5	VMRCRCW_KIDNEY	Male	KIDNEY	Kidney	Kidney Carcinoma	NA	0	WT	5.30351	5.46692	4.47269	3.11862	NA	3.60782	NA	High	Low	High_Low
BRD:BRD-K30577245-341-01-9	ACH-000485	-2.73715	DOCETAXEL	2.5	GSU_STOMACH	Unknown	STOMACH	NA	NA	NA	1	Mutant	3.31413	5.72248	3.75088	3.47197	NA	NA	NA	Low	NA	Low_NA
BRD:BRD-K30577245-341-01-9	ACH-000486	-1.95113	DOCETAXEL	2.5	KU1919_URINARY_TRACT	Female	URINARY_TRACT	Bladder	Bladder Carcinoma	NA	0	WT	2.73296	4.38968	4.50718	2.77943	NA	4.9821	NA	Low	High	Low_High
BRD:BRD-K30577245-341-01-9	ACH-000488	-3.01143	DOCETAXEL	2.5	TE11_OESOPHAGUS	Male	OESOPHAGUS	Esophagus	Esophageal Carcinoma	Esophageal Squamous Cell Carcinoma	2	Mutant	2.41921	5.27608	3.81704	3.47702	2.86937	4.47394	NA	Low	High	Low_High
BRD:BRD-K30577245-341-01-9	ACH-000489	0.354162	DOCETAXEL	2.5	SW1116_LARGE_INTESTINE	Male	LARGE_INTESTINE	Large Intestine	Colorectal Carcinoma	Colon adenocarcinoma	2	Mutant	3.21275	5.75525	2.60492	3.45417	3.40858	3.10381	NA	Low	Low	Low_Low
BRD:BRD-K30577245-341-01-9	ACH-000493	-4.91567	DOCETAXEL	2.5	SNU423_LIVER	Male	LIVER	Liver	Hepatocellular Carcinoma	NA	0	WT	3.28486	6.1675	4.08612	4.56904	NA	2.57759	1.54224	Low	Low	Low_Low
BRD:BRD-K30577245-341-01-9	ACH-000495	-0.167416	DOCETAXEL	2.5	TUHR4TKB_KIDNEY	Unknown	KIDNEY	NA	NA	NA	0	WT	3.65721	4.82293	3.91756	4.12247	NA	NA	NA	High	NA	High_NA
BRD:BRD-K30577245-341-01-9	ACH-000496	-3.86682	DOCETAXEL	2.5	NCIH1792_LUNG	Male	LUNG	Lung	Non-Small Cell Lung Carcinoma	Lung Adenocarcinoma	0	WT	3.68106	2.14642	4.81803	3.53515	NA	3.94075	NA	High	High	High_High
BRD:BRD-K30577245-341-01-9	ACH-000499	-3.4834	DOCETAXEL	2.5	EW8_BONE	Unknown	BONE	NA	NA	NA	2	Mutant	3.79484	5.98028	4.81237	4.10238	NA	NA	NA	Low	NA	Low_NA
BRD:BRD-K30577245-341-01-9	ACH-000500	-2.7157	DOCETAXEL	2.5	SNU46_UPPER_AERODIGESTIVE_TRACT	Unknown	UPPER_AERODIGESTIVE_TRACT	NA	NA	NA	2	Mutant	3.39598	6.32876	4.33344	4.73517	NA	NA	NA	High	NA	High_NA
BRD:BRD-K30577245-341-01-9	ACH-000502	-3.73247	DOCETAXEL	2.5	TCCPAN2_PANCREAS	Unknown	PANCREAS	NA	NA	NA	0	WT	3.91154	2.185	3.90471	3.38488	NA	NA	NA	High	NA	High_NA
BRD:BRD-K30577245-341-01-9	ACH-000503	-2.65111	DOCETAXEL	2.5	BICR16_UPPER_AERODIGESTIVE_TRACT	Unknown	UPPER_AERODIGESTIVE_TRACT	NA	NA	NA	2	Mutant	2.80099	2.78562	3.42365	3.33736	NA	NA	NA	Low	NA	Low_NA
BRD:BRD-K30577245-341-01-9	ACH-000504	-3.28809	DOCETAXEL	2.5	SNB75_CENTRAL_NERVOUS_SYSTEM	Female	CENTRAL_NERVOUS_SYSTEM	Central Nervous System	Glioblastoma	NA	2	Mutant	3.19491	6.19885	4.53013	4.38861	NA	3.95648	NA	Low	Low	Low_Low
BRD:BRD-K30577245-341-01-9	ACH-000505	-2.50201	DOCETAXEL	2.5	RKN_SOFT_TISSUE	Female	SOFT_TISSUE	Soft Tissue	Leiomyosarcoma	Ovarian Leiomyosarcoma	2	Mutant	3.1859	5.57423	5.50329	3.9069	0.51932	3.72856	NA	Low	Low	Low_Low
BRD:BRD-K30577245-341-01-9	ACH-000507	-3.36547	DOCETAXEL	2.5	KE39_STOMACH	Unknown	STOMACH	NA	NA	NA	2	Mutant	3.96393	5.40183	4.03804	5.23561	NA	NA	NA	High	NA	High_NA
BRD:BRD-K30577245-341-01-9	ACH-000510	-2.95958	DOCETAXEL	2.5	NCIH1299_LUNG	Male	LUNG	Lung	Non-Small Cell Lung Carcinoma	Lung large cell carcinoma	0	WT	2.78526	4.57031	4.49267	3.9521	NA	4.18868	NA	Low	High	Low_High
BRD:BRD-K30577245-341-01-9	ACH-000516	-1.2473	DOCETAXEL	2.5	CAL78_BONE	Male	BONE	Bone	Chondrosarcoma	NA	0	WT	4.32354	5.49828	5.11152	4.38229	NA	3.7557	NA	High	Low	High_Low
BRD:BRD-K30577245-341-01-9	ACH-000517	-2.55176	DOCETAXEL	2.5	SNU410_PANCREAS	Unknown	PANCREAS	NA	NA	NA	2	Mutant	3.31716	4.98833	4.26528	4.08506	NA	NA	NA	Low	NA	Low_NA
BRD:BRD-K30577245-341-01-9	ACH-000518	-2.16567	DOCETAXEL	2.5	CAL33_UPPER_AERODIGESTIVE_TRACT	Male	UPPER_AERODIGESTIVE_TRACT	Head and Neck	Head and Neck Carcinoma	Tongue Squamous Cell Carcinoma	2	Mutant	3.08948	5.88765	4.54711	5.19944	3.29483	3.34323	NA	High	Low	High_Low
BRD:BRD-K30577245-341-01-9	ACH-000521	-3.76268	DOCETAXEL	2.5	NCIH2030_LUNG	Male	LUNG	Lung	Non-Small Cell Lung Carcinoma	Lung Adenocarcinoma	2	Mutant	3.52223	5.52899	5.6444	4.63979	1.82407	5.21584	NA	High	High	High_High
BRD:BRD-K30577245-341-01-9	ACH-000524	-0.803397	DOCETAXEL	2.5	KURAMOCHI_OVARY	Female	OVARY	Ovary	Ovarian Carcinoma	High grade ovarian serous adenocarcinoma	2	Mutant	3.44602	6.80145	4.30663	4.75689	4.8391	3.8327	1.58398	High	Low	High_Low
BRD:BRD-K30577245-341-01-9	ACH-000527	-0.616093	DOCETAXEL	2.5	OVISE_OVARY	Female	OVARY	Ovary	Ovarian Carcinoma	Ovarian clear cell adenocarcinoma	0	WT	3.19939	5.11234	4.19791	3.94092	NA	3.8125	NA	Low	Low	Low_Low
BRD:BRD-K30577245-341-01-9	ACH-000528	-4.00982	DOCETAXEL	2.5	ABC1_LUNG	Male	LUNG	Lung	Non-Small Cell Lung Carcinoma	Lung Adenocarcinoma	2	Mutant	4.36534	6.44454	3.76416	4.88321	2.88178	3.84871	NA	High	Low	High_Low
BRD:BRD-K30577245-341-01-9	ACH-000530	0.233771	DOCETAXEL	2.5	NA	Male	NA	Lung	Small Cell Lung Carcinoma	NA	2	Mutant	4.12436	3.27301	5.5297	3.85936	NA	5.13826	NA	High	High	High_High
BRD:BRD-K30577245-341-01-9	ACH-000532	-2.60329	DOCETAXEL	2.5	SNU61_LARGE_INTESTINE	Male	LARGE_INTESTINE	Large Intestine	Colorectal Carcinoma	Rectal adenocarcinoma	2	Mutant	3.58182	5.94338	3.2779	4.23982	NA	4.09849	0.04254	Low	High	Low_High
BRD:BRD-K30577245-341-01-9	ACH-000533	-1.01807	DOCETAXEL	2.5	NCIH2004RT_SOFT_TISSUE	Unknown	SOFT_TISSUE	NA	NA	NA	0	WT	2.47393	5.94756	4.28135	3.95581	NA	NA	NA	Low	NA	Low_NA
BRD:BRD-K30577245-341-01-9	ACH-000535	-0.601854	DOCETAXEL	2.5	BXPC3_PANCREAS	Female	PANCREAS	Pancreas	Pancreatic Carcinoma	Pancreatic ductal adenocarcinoma	2	Mutant	2.42427	6.0651	4.05528	4.5183	0.96498	3.38109	NA	Low	Low	Low_Low
BRD:BRD-K30577245-341-01-9	ACH-000537	-2.31867	DOCETAXEL	2.5	SNU761_LIVER	Unknown	LIVER	NA	NA	NA	0	WT	2.93543	3.0662	5.05784	2.62164	NA	NA	NA	Low	NA	Low_NA
BRD:BRD-K30577245-341-01-9	ACH-000542	-1.3349	DOCETAXEL	2.5	HEYA8_OVARY	Female	OVARY	NA	NA	NA	0	WT	2.48124	5.27908	3.04865	3.52541	NA	NA	NA	Low	NA	Low_NA
BRD:BRD-K30577245-341-01-9	ACH-000543	-0.554172	DOCETAXEL	2.5	SNU489_CENTRAL_NERVOUS_SYSTEM	Unknown	CENTRAL_NERVOUS_SYSTEM	NA	NA	NA	0	WT	2.49814	4.45902	4.72984	3.87991	NA	NA	NA	Low	NA	Low_NA
BRD:BRD-K30577245-341-01-9	ACH-000544	-4.25106	DOCETAXEL	2.5	OE21_OESOPHAGUS	Male	OESOPHAGUS	Esophagus	Esophageal Carcinoma	Esophageal Squamous Cell Carcinoma	0	WT	2.06577	1.72201	2.92239	2.5363	NA	3.67811	NA	Low	Low	Low_Low
BRD:BRD-K30577245-341-01-9	ACH-000545	-2.14237	DOCETAXEL	2.5	VMCUB1_URINARY_TRACT	Unknown	URINARY_TRACT	NA	NA	NA	2	Mutant	4.27765	5.19486	5.10413	3.8164	NA	NA	NA	High	NA	High_NA
BRD:BRD-K30577245-341-01-9	ACH-000547	0.476422	DOCETAXEL	2.5	HT1197_URINARY_TRACT	Male	URINARY_TRACT	Bladder	Bladder Carcinoma	NA	0	WT	2.86601	5.32657	2.87389	4.45313	NA	3.40589	NA	Low	Low	Low_Low
BRD:BRD-K30577245-341-01-9	ACH-000548	0.233204	DOCETAXEL	2.5	BHY_UPPER_AERODIGESTIVE_TRACT	Male	UPPER_AERODIGESTIVE_TRACT	Head and Neck	Head and Neck Carcinoma	Head and Neck Squamous Cell Carcinoma	0	WT	3.34957	3.5803	4.67859	4.02906	NA	4.01614	NA	High	High	High_High
BRD:BRD-K30577245-341-01-9	ACH-000549	-4.10555	DOCETAXEL	2.5	SNU1076_UPPER_AERODIGESTIVE_TRACT	Unknown	UPPER_AERODIGESTIVE_TRACT	NA	NA	NA	0	WT	3.16008	3.16707	4.37437	4.81282	NA	NA	NA	High	NA	High_NA
BRD:BRD-K30577245-341-01-9	ACH-000552	-3.65444	DOCETAXEL	2.5	HT29_LARGE_INTESTINE	Female	LARGE_INTESTINE	Large Intestine	Colorectal Carcinoma	Colon adenocarcinoma	2	Mutant	4.02818	5.82966	4.71681	4.35818	4.38313	4.20714	NA	High	High	High_High
BRD:BRD-K30577245-341-01-9	ACH-000553	-4.96855	DOCETAXEL	2.5	SQ1_LUNG	Unknown	LUNG	NA	NA	NA	0	WT	3.35227	3.32055	3.58922	4.29174	NA	NA	NA	Low	NA	Low_NA
BRD:BRD-K30577245-341-01-9	ACH-000555	0.184523	DOCETAXEL	2.5	A498_KIDNEY	Female	KIDNEY	Kidney	Kidney Carcinoma	NA	0	WT	3.509	5.52423	4.83022	2.57731	NA	4.69792	NA	High	High	High_High
BRD:BRD-K30577245-341-01-9	ACH-000558	-3.34072	DOCETAXEL	2.5	A172_CENTRAL_NERVOUS_SYSTEM	Male	CENTRAL_NERVOUS_SYSTEM	Central Nervous System	Glioblastoma	NA	0	WT	3.93072	6.30834	4.68785	3.0637	NA	4.61061	NA	High	High	High_High
BRD:BRD-K30577245-341-01-9	ACH-000561	-4.20413	DOCETAXEL	2.5	TT_OESOPHAGUS	Male	OESOPHAGUS	Esophagus	Esophageal Carcinoma	Esophageal Squamous Cell Carcinoma	1	Mutant	3.8865	4.75452	5.06625	3.41533	2.97113	4.67734	NA	High	High	High_High
BRD:BRD-K30577245-341-01-9	ACH-000562	0.630386	DOCETAXEL	2.5	HCC78_LUNG	Male	LUNG	Lung	Non-Small Cell Lung Carcinoma	Lung Adenocarcinoma	2	Mutant	2.66379	4.24283	4.43437	3.9632	2.90207	4.38087	2.09297	Low	High	Low_High
BRD:BRD-K30577245-341-01-9	ACH-000563	-2.05892	DOCETAXEL	2.5	EBC1_LUNG	Male	LUNG	Lung	Non-Small Cell Lung Carcinoma	Squamous Cell Lung Carcinoma	2	Mutant	3.14158	2.70283	4.00539	3.67327	NA	3.62261	NA	Low	Low	Low_Low
BRD:BRD-K30577245-341-01-9	ACH-000565	-4.70945	DOCETAXEL	2.5	RCM1_LARGE_INTESTINE	Female	LARGE_INTESTINE	Large Intestine	Colorectal Carcinoma	Rectal adenocarcinoma	2	Mutant	3.40638	2.92441	4.21061	3.1547	NA	4.09352	NA	Low	High	Low_High
BRD:BRD-K30577245-341-01-9	ACH-000566	-4.50413	DOCETAXEL	2.5	SW1710_URINARY_TRACT	Female	URINARY_TRACT	Bladder	Bladder Carcinoma	NA	2	Mutant	3.3855	5.3392	4.57223	3.74701	4.14516	3.28443	NA	High	Low	High_Low
BRD:BRD-K30577245-341-01-9	ACH-000569	-3.4315	DOCETAXEL	2.5	ISTMES1_PLEURA	Female	PLEURA	Lung	Mesothelioma	Pleural Epithelioid Mesothelioma	0	WT	2.77336	6.39232	3.63205	3.57942	NA	3.32483	NA	Low	Low	Low_Low
BRD:BRD-K30577245-341-01-9	ACH-000570	-4.65906	DOCETAXEL	2.5	YKG1_CENTRAL_NERVOUS_SYSTEM	Female	CENTRAL_NERVOUS_SYSTEM	Central Nervous System	Glioblastoma	NA	0	WT	3.59355	6.73338	5.56114	4.15376	NA	4.49076	NA	High	High	High_High
BRD:BRD-K30577245-341-01-9	ACH-000571	-4.91257	DOCETAXEL	2.5	T98G_CENTRAL_NERVOUS_SYSTEM	Male	CENTRAL_NERVOUS_SYSTEM	Central Nervous System	Glioblastoma	NA	2	Mutant	3.53297	6.6173	5.45677	4.35245	3.3825	3.45725	2.12732	High	Low	High_Low
BRD:BRD-K30577245-341-01-9	ACH-000572	-3.81609	DOCETAXEL	2.5	G361_SKIN	Male	SKIN	Skin	Melanoma	NA	0	WT	3.74421	3.59069	5.21167	3.64299	NA	4.66117	NA	High	High	High_High
BRD:BRD-K30577245-341-01-9	ACH-000573	-2.23909	DOCETAXEL	2.5	MDAMB436_BREAST	Female	BREAST	Breast	Breast Carcinoma	Invasive Ductal Carcinoma of No Special Type	0	WT	3.8097	5.06264	6.04702	3.59469	NA	4.22769	NA	High	High	High_High
BRD:BRD-K30577245-341-01-9	ACH-000579	-1.20332	DOCETAXEL	2.5	UACC257_SKIN	Unknown	SKIN	Skin	Melanoma	NA	0	WT	3.12285	4.46738	4.31387	4.50535	NA	3.86841	NA	Low	High	Low_High
BRD:BRD-K30577245-341-01-9	ACH-000580	-5.1129	DOCETAXEL	2.5	C32_SKIN	Male	SKIN	Skin	Melanoma	Cutaneous melanoma	0	WT	3.00002	4.92997	4.82132	3.45545	NA	4.68426	NA	Low	High	Low_High
BRD:BRD-K30577245-341-01-9	ACH-000582	-1.18838	DOCETAXEL	2.5	COLO741_SKIN	Unknown	SKIN	NA	NA	NA	0	WT	3.34688	3.69722	4.78808	4.49426	NA	NA	NA	Low	NA	Low_NA
BRD:BRD-K30577245-341-01-9	ACH-000587	-3.29586	DOCETAXEL	2.5	NCIH1975_LUNG	Female	LUNG	Lung	Non-Small Cell Lung Carcinoma	Lung Adenocarcinoma	2	Mutant	3.09589	6.53072	4.53184	4.42737	3.83666	3.88759	NA	Low	Low	Low_Low
BRD:BRD-K30577245-341-01-9	ACH-000589	-5.25329	DOCETAXEL	2.5	NCIH1437_LUNG	Male	LUNG	Lung	Non-Small Cell Lung Carcinoma	Lung Adenocarcinoma	2	Mutant	3.41414	3.82845	3.9303	4.38158	NA	3.69239	1.06067	Low	Low	Low_Low
BRD:BRD-K30577245-341-01-9	ACH-000590	-2.44567	DOCETAXEL	2.5	NA	Unknown	NA	NA	NA	NA	1	Mutant	3.25931	4.65932	3.54514	1.79259	NA	NA	NA	Low	NA	Low_NA
BRD:BRD-K30577245-341-01-9	ACH-000592	-3.33811	DOCETAXEL	2.5	TM31_CENTRAL_NERVOUS_SYSTEM	Unknown	CENTRAL_NERVOUS_SYSTEM	NA	NA	NA	2	Mutant	3.84764	5.04001	4.43134	5.07885	NA	NA	NA	High	NA	High_NA
BRD:BRD-K30577245-341-01-9	ACH-000593	-5.18967	DOCETAXEL	2.5	BC3C_URINARY_TRACT	Unknown	URINARY_TRACT	NA	NA	NA	2	Mutant	3.36298	6.25791	4.54429	4.31616	NA	NA	NA	Low	NA	Low_NA
BRD:BRD-K30577245-341-01-9	ACH-000595	-2.68973	DOCETAXEL	2.5	LN229_CENTRAL_NERVOUS_SYSTEM	Female	CENTRAL_NERVOUS_SYSTEM	Central Nervous System	Glioblastoma	NA	0	WT	3.67675	5.30834	4.54373	2.59074	NA	3.70584	NA	High	Low	High_Low
BRD:BRD-K30577245-341-01-9	ACH-000597	-1.74114	DOCETAXEL	2.5	TTC709_SOFT_TISSUE	Unknown	SOFT_TISSUE	NA	NA	NA	0	WT	5.44778	5.99639	4.38949	4.53162	NA	NA	NA	High	NA	High_NA
BRD:BRD-K30577245-341-01-9	ACH-000599	-2.53678	DOCETAXEL	2.5	PATU8902_PANCREAS	Female	PANCREAS	Pancreas	Pancreatic Carcinoma	Pancreatic adenocarcinoma	2	Mutant	2.88644	6.76655	4.20921	5.05393	4.83305	3.5949	NA	Low	Low	Low_Low
BRD:BRD-K30577245-341-01-9	ACH-000601	-3.88675	DOCETAXEL	2.5	MIAPACA2_PANCREAS	Male	PANCREAS	Pancreas	Pancreatic Carcinoma	Pancreatic ductal adenocarcinoma	2	Mutant	2.75128	6.02192	3.91157	3.39288	4.66259	3.21672	NA	Low	Low	Low_Low
BRD:BRD-K30577245-341-01-9	ACH-000603	-1.59998	DOCETAXEL	2.5	BEN_LUNG	Male	LUNG	Lung	Non-Small Cell Lung Carcinoma	NA	2	Mutant	3.67027	3.8994	4.70266	3.38354	NA	4.784	NA	High	High	High_High
BRD:BRD-K30577245-341-01-9	ACH-000605	-4.06056	DOCETAXEL	2.5	TE6_OESOPHAGUS	Male	OESOPHAGUS	Esophagus	Esophageal Carcinoma	Esophageal Squamous Cell Carcinoma	2	Mutant	3.80179	6.25225	5.1517	4.99482	3.18362	4.37109	NA	High	High	High_High
BRD:BRD-K30577245-341-01-9	ACH-000608	-1.90893	DOCETAXEL	2.5	COV644_OVARY	Female	OVARY	NA	NA	NA	0	WT	4.31936	1.4662	3.42247	4.11664	NA	NA	NA	High	NA	High_NA
BRD:BRD-K30577245-341-01-9	ACH-000609	-5.11687	DOCETAXEL	2.5	SF126_CENTRAL_NERVOUS_SYSTEM	Female	CENTRAL_NERVOUS_SYSTEM	Central Nervous System	Glioblastoma	NA	0	WT	3.2693	2.43789	5.34766	4.62481	NA	4.17849	NA	Low	High	Low_High
BRD:BRD-K30577245-341-01-9	ACH-000613	-4.34984	DOCETAXEL	2.5	HOS_BONE	Female	BONE	Bone	Osteosarcoma	NA	2	Mutant	3.57518	6.64574	4.85798	4.29769	2.87303	3.47386	NA	Low	Low	Low_Low
BRD:BRD-K30577245-341-01-9	ACH-000614	-0.923887	DOCETAXEL	2.5	RVH421_SKIN	Male	SKIN	Skin	Melanoma	NA	0	WT	2.98629	5.79902	3.99651	2.93522	NA	3.64887	NA	Low	Low	Low_Low
BRD:BRD-K30577245-341-01-9	ACH-000616	-2.89426	DOCETAXEL	2.5	NA	Male	NA	Stomach	Gastric Carcinoma	Gastric adenocarcinoma	0	WT	3.39728	3.13783	5.28707	5.25419	NA	4.39921	NA	High	High	High_High
BRD:BRD-K30577245-341-01-9	ACH-000617	-2.28858	DOCETAXEL	2.5	NA	Female	NA	Ovary	Ovarian Carcinoma	High grade ovarian serous adenocarcinoma	2	Mutant	3.03546	4.855	3.62793	4.54578	2.88077	2.97114	NA	Low	Low	Low_Low
BRD:BRD-K30577245-341-01-9	ACH-000618	-1.90307	DOCETAXEL	2.5	SNU1041_UPPER_AERODIGESTIVE_TRACT	Unknown	UPPER_AERODIGESTIVE_TRACT	NA	NA	NA	2	Mutant	3.95145	5.46494	3.93874	3.3346	NA	NA	NA	High	NA	High_NA
BRD:BRD-K30577245-341-01-9	ACH-000619	-3.50918	DOCETAXEL	2.5	PECAPJ15_UPPER_AERODIGESTIVE_TRACT	Male	UPPER_AERODIGESTIVE_TRACT	Head and Neck	Head and Neck Carcinoma	Tongue Squamous Cell Carcinoma	2	Mutant	2.53139	5.60525	4.34249	3.55445	4.12376	4.44442	NA	Low	High	Low_High
BRD:BRD-K30577245-341-01-9	ACH-000620	-2.09116	DOCETAXEL	2.5	JHH1_LIVER	Male	LIVER	Liver	Hepatocellular Carcinoma	NA	0	WT	5.04782	4.85153	4.41791	3.93343	NA	4.27184	NA	High	High	High_High
BRD:BRD-K30577245-341-01-9	ACH-000622	-4.76547	DOCETAXEL	2.5	KNS42_CENTRAL_NERVOUS_SYSTEM	Male	CENTRAL_NERVOUS_SYSTEM	Central Nervous System	Glioblastoma	NA	2	Mutant	4.0358	4.98372	5.98688	5.24089	NA	5.19955	NA	High	High	High_High
BRD:BRD-K30577245-341-01-9	ACH-000623	-1.66668	DOCETAXEL	2.5	SNU201_CENTRAL_NERVOUS_SYSTEM	Unknown	CENTRAL_NERVOUS_SYSTEM	NA	NA	NA	1	Mutant	3.03713	6.92487	5.49398	3.94373	NA	NA	NA	Low	NA	Low_NA
BRD:BRD-K30577245-341-01-9	ACH-000624	-3.82867	DOCETAXEL	2.5	HCC1806_BREAST	Female	BREAST	Breast	Breast Carcinoma	Breast squamous cell carcinoma	0	WT	2.73296	3.84116	4.45903	4.30437	NA	4.72365	NA	Low	High	Low_High
BRD:BRD-K30577245-341-01-9	ACH-000625	-1.80583	DOCETAXEL	2.5	HEP3B217_LIVER	Male	LIVER	Liver	Hepatocellular Carcinoma	NA	0	WT	3.75243	4.48271	4.26312	2.58404	NA	3.23904	NA	High	Low	High_Low
BRD:BRD-K30577245-341-01-9	ACH-000627	-5.21323	DOCETAXEL	2.5	LCLC103H_LUNG	Male	LUNG	Lung	Non-Small Cell Lung Carcinoma	Lung large cell carcinoma	2	Mutant	2.5662	5.5331	4.91379	4.13077	NA	3.91428	NA	Low	Low	Low_Low
BRD:BRD-K30577245-341-01-9	ACH-000628	-1.36628	DOCETAXEL	2.5	NCIH596_LUNG	Male	LUNG	Lung	Non-Small Cell Lung Carcinoma	Adenosquamous lung carcinoma	2	Mutant	3.30166	6.37636	5.13231	4.44233	1.84835	4.52063	NA	Low	High	Low_High
BRD:BRD-K30577245-341-01-9	ACH-000630	-0.351438	DOCETAXEL	2.5	YD8_UPPER_AERODIGESTIVE_TRACT	Unknown	UPPER_AERODIGESTIVE_TRACT	NA	NA	NA	2	Mutant	3.56241	6.86202	5.16673	3.89924	NA	NA	NA	High	NA	High_NA
BRD:BRD-K30577245-341-01-9	ACH-000631	-1.03141	DOCETAXEL	2.5	KS1_CENTRAL_NERVOUS_SYSTEM	Female	CENTRAL_NERVOUS_SYSTEM	Central Nervous System	Glioblastoma	NA	0	WT	3.59012	5.59771	4.87621	4.044	NA	4.36572	NA	High	High	High_High
BRD:BRD-K30577245-341-01-9	ACH-000632	-1.58	DOCETAXEL	2.5	HS944T_SKIN	Unknown	SKIN	NA	NA	NA	0	WT	3.17077	3.92448	3.81886	2.32652	NA	NA	NA	Low	NA	Low_NA
BRD:BRD-K30577245-341-01-9	ACH-000637	-1.94727	DOCETAXEL	2.5	KYSE520_OESOPHAGUS	Female	OESOPHAGUS	Esophagus	Esophageal Carcinoma	Esophageal Squamous Cell Carcinoma	0	WT	3.25501	5.67754	4.98078	4.55021	NA	4.0781	NA	Low	Low	Low_Low
BRD:BRD-K30577245-341-01-9	ACH-000638	-2.54046	DOCETAXEL	2.5	NCIH441_LUNG	Male	LUNG	Lung	Non-Small Cell Lung Carcinoma	Lung Adenocarcinoma	2	Mutant	4.01195	5.74212	4.27799	4.78157	NA	4.21684	NA	High	High	High_High
BRD:BRD-K30577245-341-01-9	ACH-000643	-2.46989	DOCETAXEL	2.5	HDQP1_BREAST	Female	BREAST	Breast	Breast Carcinoma	NA	2	Mutant	2.84718	3.64157	3.8646	3.10907	NA	4.18591	NA	Low	High	Low_High
BRD:BRD-K30577245-341-01-9	ACH-000644	-0.755223	DOCETAXEL	2.5	NA	Male	NA	Skin	Melanoma	Cutaneous melanoma	0	WT	3.34147	4.87471	4.18438	3.1578	NA	3.5482	NA	Low	Low	Low_Low
BRD:BRD-K30577245-341-01-9	ACH-000645	-3.6242	DOCETAXEL	2.5	JL1_PLEURA	Unknown	PLEURA	NA	NA	NA	0	WT	2.18039	6.54529	4.80099	2.03369	NA	NA	NA	Low	NA	Low_NA
BRD:BRD-K30577245-341-01-9	ACH-000647	-3.29735	DOCETAXEL	2.5	TE1_OESOPHAGUS	Male	OESOPHAGUS	Esophagus	Esophageal Carcinoma	Esophageal Squamous Cell Carcinoma	2	Mutant	3.40249	6.12038	4.26922	4.2394	2.88094	4.08058	NA	High	High	High_High
BRD:BRD-K30577245-341-01-9	ACH-000648	-0.306073	DOCETAXEL	2.5	NCIH28_PLEURA	Male	PLEURA	Lung	Mesothelioma	Pleural Sarcomatoid Mesothelioma	0	WT	6.14531	5.99359	5.00718	2.8527	NA	4.99773	NA	High	High	High_High
BRD:BRD-K30577245-341-01-9	ACH-000649	-2.56344	DOCETAXEL	2.5	786O_KIDNEY	Male	KIDNEY	Kidney	Kidney Carcinoma	NA	1	Mutant	3.26503	3.72692	3.10367	3.6997	NA	3.6032	NA	Low	Low	Low_Low
BRD:BRD-K30577245-341-01-9	ACH-000650	-2.65496	DOCETAXEL	2.5	IGR37_SKIN	Male	SKIN	Skin	Melanoma	NA	0	WT	3.73905	1.43274	4.04276	4.29695	NA	4.53819	NA	High	High	High_High
BRD:BRD-K30577245-341-01-9	ACH-000651	-2.11305	DOCETAXEL	2.5	SW620_LARGE_INTESTINE	Male	LARGE_INTESTINE	Large Intestine	Colorectal Carcinoma	Colon adenocarcinoma	2	Mutant	3.89303	5.89685	4.25563	4.71939	4.91585	3.74619	NA	High	Low	High_Low
BRD:BRD-K30577245-341-01-9	ACH-000652	-1.76805	DOCETAXEL	2.5	SUIT2_PANCREAS	Male	PANCREAS	Pancreas	Pancreatic Carcinoma	Pancreatic ductal adenocarcinoma	2	Mutant	4.62314	4.81531	4.17217	5.25218	3.47098	3.77354	-0.77067	High	High	High_High
BRD:BRD-K30577245-341-01-9	ACH-000657	-2.32332	DOCETAXEL	2.5	A2780_OVARY	Female	OVARY	Ovary	Ovarian Carcinoma	Ovarian endometrioid adenocarcinoma	0	WT	3.13225	5.59103	5.484	4.63919	NA	4.62938	NA	Low	High	Low_High
BRD:BRD-K30577245-341-01-9	ACH-000661	-2.96196	DOCETAXEL	2.5	WM1799_SKIN	Unknown	SKIN	NA	NA	NA	0	WT	3.29329	5.37751	4.78135	3.86034	NA	NA	NA	Low	NA	Low_NA
BRD:BRD-K30577245-341-01-9	ACH-000662	-1.59085	DOCETAXEL	2.5	CORL23_LUNG	Male	LUNG	Lung	Non-Small Cell Lung Carcinoma	Lung large cell carcinoma	0	WT	3.13069	7.5604	4.52557	4.36815	1.62416	3.72727	NA	Low	Low	Low_Low
BRD:BRD-K30577245-341-01-9	ACH-000663	-1.81754	DOCETAXEL	2.5	OVTOKO_OVARY	Female	OVARY	Ovary	Ovarian Carcinoma	Ovarian clear cell adenocarcinoma	0	WT	3.44728	4.78963	2.21066	2.84515	NA	3.07603	NA	High	Low	High_Low
BRD:BRD-K30577245-341-01-9	ACH-000665	-3.64173	DOCETAXEL	2.5	SKMES1_LUNG	Male	LUNG	Lung	Non-Small Cell Lung Carcinoma	Squamous Cell Lung Carcinoma	2	Mutant	3.36565	2.5908	5.61993	4.29918	NA	4.2853	NA	Low	High	Low_High
BRD:BRD-K30577245-341-01-9	ACH-000666	-3.09001	DOCETAXEL	2.5	NCIH1355_LUNG	Male	LUNG	Lung	Non-Small Cell Lung Carcinoma	Lung Adenocarcinoma	2	Mutant	3.90231	5.05788	4.9248	5.30436	NA	4.29982	2.80384	High	High	High_High
BRD:BRD-K30577245-341-01-9	ACH-000667	-4.09005	DOCETAXEL	2.5	HCC44_LUNG	Unknown	LUNG	NA	NA	NA	2	Mutant	2.34383	1.95769	2.6568	2.17975	NA	NA	NA	Low	NA	Low_NA
BRD:BRD-K30577245-341-01-9	ACH-000669	-4.53431	DOCETAXEL	2.5	SW900_LUNG	Unknown	LUNG	NA	NA	NA	2	Mutant	3.61057	3.78765	4.62982	4.24402	NA	NA	NA	High	NA	High_NA
BRD:BRD-K30577245-341-01-9	ACH-000670	-1.98129	DOCETAXEL	2.5	SBC5_LUNG	Male	LUNG	Lung	Small Cell Lung Carcinoma	NA	2	Mutant	3.90324	5.20707	5.04857	4.33514	NA	5.70679	NA	High	High	High_High
BRD:BRD-K30577245-341-01-9	ACH-000671	-1.21697	DOCETAXEL	2.5	HUH6_LIVER	Unknown	LIVER	NA	NA	NA	2	Mutant	3.59355	4.78496	2.48236	4.67865	NA	NA	NA	Low	NA	Low_NA
BRD:BRD-K30577245-341-01-9	ACH-000672	-2.68381	DOCETAXEL	2.5	IALM_LUNG	Male	LUNG	Lung	Non-Small Cell Lung Carcinoma	Lung large cell carcinoma	2	Mutant	3.00002	2.86223	4.777	4.7318	NA	3.6833	NA	Low	Low	Low_Low
BRD:BRD-K30577245-341-01-9	ACH-000674	-4.07771	DOCETAXEL	2.5	NUGC4_STOMACH	Female	STOMACH	Stomach	Gastric Carcinoma	Gastric signet ring cell adenocarcinoma	0	WT	4.71546	5.81376	3.42955	1.98509	NA	2.79869	NA	High	Low	High_Low
BRD:BRD-K30577245-341-01-9	ACH-000677	-3.17008	DOCETAXEL	2.5	SW1573_LUNG	Female	LUNG	Lung	Non-Small Cell Lung Carcinoma	Lung Adenocarcinoma	0	WT	4.16904	5.59316	4.3263	5.32291	NA	3.73337	NA	High	Low	High_Low
BRD:BRD-K30577245-341-01-9	ACH-000678	-1.17012	DOCETAXEL	2.5	MKN7_STOMACH	Male	STOMACH	Stomach	Gastric Carcinoma	Gastric tubular adenocarcinoma	2	Mutant	3.31689	6.19031	3.25898	4.74468	2.6668	2.66925	NA	Low	Low	Low_Low
BRD:BRD-K30577245-341-01-9	ACH-000679	-3.58793	DOCETAXEL	2.5	OE19_OESOPHAGUS	Male	OESOPHAGUS	Esophagus	Esophageal Carcinoma	Esophageal Adenocarcinoma	0	WT	3.73595	3.49084	3.64743	3.56758	NA	3.9106	NA	High	Low	High_Low
BRD:BRD-K30577245-341-01-9	ACH-000680	-3.12892	DOCETAXEL	2.5	SW948_LARGE_INTESTINE	Female	LARGE_INTESTINE	Large Intestine	Colorectal Carcinoma	Colon adenocarcinoma	0	WT	4.10594	3.21212	3.28381	4.48309	NA	3.40469	NA	High	Low	High_Low
BRD:BRD-K30577245-341-01-9	ACH-000681	-1.2239	DOCETAXEL	2.5	A549_LUNG	Male	LUNG	Lung	Non-Small Cell Lung Carcinoma	Lung Adenocarcinoma	0	WT	3.58094	5.07725	3.76321	3.75967	NA	3.17031	NA	High	Low	High_Low
BRD:BRD-K30577245-341-01-9	ACH-000682	-3.38073	DOCETAXEL	2.5	SNU1066_UPPER_AERODIGESTIVE_TRACT	Unknown	UPPER_AERODIGESTIVE_TRACT	NA	NA	NA	0	WT	3.2333	2.98067	3.54404	4.98434	NA	NA	NA	High	NA	High_NA
BRD:BRD-K30577245-341-01-9	ACH-000684	-2.01163	DOCETAXEL	2.5	KMRC1_KIDNEY	Male	KIDNEY	Kidney	Kidney Carcinoma	Clear cell renal cell carcinoma	0	WT	2.10079	3.26589	2.85163	2.47748	NA	3.03455	NA	Low	Low	Low_Low
BRD:BRD-K30577245-341-01-9	ACH-000685	-4.33868	DOCETAXEL	2.5	L33_PANCREAS	Unknown	PANCREAS	NA	NA	NA	0	WT	3.14158	2.81674	4.49442	4.0769	NA	NA	NA	Low	NA	Low_NA
BRD:BRD-K30577245-341-01-9	ACH-000688	-1.15611	DOCETAXEL	2.5	OV7_OVARY	Female	OVARY	Ovary	Ovarian Carcinoma	NA	2	Mutant	2.66379	4.68508	3.83786	3.73852	NA	4.78521	NA	Low	High	Low_High
BRD:BRD-K30577245-341-01-9	ACH-000692	-2.69068	DOCETAXEL	2.5	SNU899_UPPER_AERODIGESTIVE_TRACT	Unknown	UPPER_AERODIGESTIVE_TRACT	NA	NA	NA	2	Mutant	3.63629	5.57484	3.30569	4.92197	NA	NA	NA	High	NA	High_NA
BRD:BRD-K30577245-341-01-9	ACH-000693	-3.07093	DOCETAXEL	2.5	KYSE180_OESOPHAGUS	Male	OESOPHAGUS	Esophagus	Esophageal Carcinoma	Esophageal Squamous Cell Carcinoma	2	Mutant	3.37627	5.68355	4.37058	3.94932	3.2854	4.13679	NA	Low	High	Low_High
BRD:BRD-K30577245-341-01-9	ACH-000694	-3.43993	DOCETAXEL	2.5	TE9_OESOPHAGUS	Male	OESOPHAGUS	Esophagus	Esophageal Carcinoma	Esophageal Squamous Cell Carcinoma	0	WT	3.44097	4.11049	4.64097	3.3249	NA	3.61823	NA	High	Low	High_Low
BRD:BRD-K30577245-341-01-9	ACH-000696	-2.47766	DOCETAXEL	2.5	OVCAR8_OVARY	Female	OVARY	Ovary	Ovarian Carcinoma	High grade ovarian serous adenocarcinoma	0	WT	3.19491	5.72164	4.25085	3.94652	NA	3.25124	NA	Low	Low	Low_Low
BRD:BRD-K30577245-341-01-9	ACH-000698	-0.946816	DOCETAXEL	2.5	DMS53_LUNG	Male	LUNG	Lung	Small Cell Lung Carcinoma	NA	2	Mutant	4.79074	5.73302	4.5095	5.00663	NA	4.37654	NA	High	High	High_High
BRD:BRD-K30577245-341-01-9	ACH-000699	-1.67335	DOCETAXEL	2.5	HCC1395_BREAST	Female	BREAST	Breast	Breast Carcinoma	Ductal Breast Carcinoma	2	Mutant	2.37026	7.05369	4.75802	3.59819	3.82305	4.86137	NA	Low	High	Low_High
BRD:BRD-K30577245-341-01-9	ACH-000701	-1.97142	DOCETAXEL	2.5	RMUGS_OVARY	Female	OVARY	NA	NA	NA	0	WT	2.95845	6.09669	3.43308	4.33586	NA	NA	NA	Low	NA	Low_NA
BRD:BRD-K30577245-341-01-9	ACH-000704	-3.50111	DOCETAXEL	2.5	OAW42_OVARY	Female	OVARY	Ovary	Ovarian Carcinoma	Ovarian Cystadenocarcinoma	0	WT	4.24135	5.39838	4.1096	3.81133	NA	4.66509	NA	High	High	High_High
BRD:BRD-K30577245-341-01-9	ACH-000706	-2.64239	DOCETAXEL	2.5	EKVX_LUNG	Male	LUNG	Lung	Non-Small Cell Lung Carcinoma	Lung adenocarcinoma	0	WT	4.1543	2.66499	5.17939	3.78054	NA	5.4737	NA	High	High	High_High
BRD:BRD-K30577245-341-01-9	ACH-000711	-2.97315	DOCETAXEL	2.5	JIMT1_BREAST	Female	BREAST	Breast	Breast Carcinoma	Ductal Breast Carcinoma	2	Mutant	2.86974	6.60435	3.83336	4.40811	4.38967	3.85532	NA	Low	Low	Low_Low
BRD:BRD-K30577245-341-01-9	ACH-000713	-2.43562	DOCETAXEL	2.5	CAOV3_OVARY	Female	OVARY	Ovary	Ovarian Carcinoma	High grade ovarian serous adenocarcinoma	2	Mutant	4.31308	1.72996	4.56891	4.2775	NA	4.21818	NA	High	High	High_High
BRD:BRD-K30577245-341-01-9	ACH-000715	-2.75246	DOCETAXEL	2.5	SNU1214_UPPER_AERODIGESTIVE_TRACT	Unknown	UPPER_AERODIGESTIVE_TRACT	NA	NA	NA	2	Mutant	3.61957	4.97596	3.97202	4.16513	NA	NA	NA	High	NA	High_NA
BRD:BRD-K30577245-341-01-9	ACH-000716	-2.3784	DOCETAXEL	2.5	TT2609C02_THYROID	Male	THYROID	Thyroid	Thyroid Gland Carcinoma	Thyroid gland follicular carcinoma	2	Mutant	3.28346	5.28505	4.50718	4.89084	4.19185	3.69507	NA	High	Low	High_Low
BRD:BRD-K30577245-341-01-9	ACH-000717	-2.08195	DOCETAXEL	2.5	COLO680N_OESOPHAGUS	Female	OESOPHAGUS	Esophagus	Esophageal Carcinoma	Esophageal Squamous Cell Carcinoma	2	Mutant	3.31551	7.14298	4.60726	5.17005	4.88695	3.41314	NA	Low	Low	Low_Low
BRD:BRD-K30577245-341-01-9	ACH-000719	-1.68963	DOCETAXEL	2.5	RMGI_OVARY	Female	OVARY	Ovary	Ovarian Carcinoma	Ovarian clear cell adenocarcinoma	0	WT	2.69354	3.27443	3.25502	2.38104	NA	2.87858	NA	Low	Low	Low_Low
BRD:BRD-K30577245-341-01-9	ACH-000720	-2.16136	DOCETAXEL	2.5	TCCSUP_URINARY_TRACT	Female	URINARY_TRACT	Bladder	Bladder Carcinoma	NA	2	Mutant	3.2157	5.09003	4.84278	3.91927	NA	5.13197	NA	Low	High	Low_High
BRD:BRD-K30577245-341-01-9	ACH-000721	-1.74634	DOCETAXEL	2.5	HMC18_BREAST	Female	BREAST	NA	NA	NA	0	WT	3.02206	2.77774	3.58072	4.15295	NA	NA	NA	Low	NA	Low_NA
BRD:BRD-K30577245-341-01-9	ACH-000723	-2.62867	DOCETAXEL	2.5	YD10B_UPPER_AERODIGESTIVE_TRACT	Unknown	UPPER_AERODIGESTIVE_TRACT	NA	NA	NA	0	WT	3.20979	3.06946	4.21412	3.71923	NA	NA	NA	High	NA	High_NA
BRD:BRD-K30577245-341-01-9	ACH-000724	-2.64711	DOCETAXEL	2.5	HT1376_URINARY_TRACT	Female	URINARY_TRACT	Bladder	Bladder Carcinoma	NA	2	Mutant	3.94966	6.58361	4.39505	4.67806	1.29136	4.26346	NA	High	High	High_High
BRD:BRD-K30577245-341-01-9	ACH-000726	-2.39494	DOCETAXEL	2.5	TE14_OESOPHAGUS	Unknown	OESOPHAGUS	NA	NA	NA	2	Mutant	3.70241	3.57334	3.98758	4.72899	NA	NA	NA	High	NA	High_NA
BRD:BRD-K30577245-341-01-9	ACH-000730	-2.99313	DOCETAXEL	2.5	SKMEL5_SKIN	Female	SKIN	Skin	Melanoma	Cutaneous melanoma	0	WT	3.36698	3.92999	4.25972	3.71166	NA	3.31873	NA	Low	Low	Low_Low
BRD:BRD-K30577245-341-01-9	ACH-000732	-2.17185	DOCETAXEL	2.5	PECAPJ41CLONED2_UPPER_AERODIGESTIVE_TRACT	Unknown	UPPER_AERODIGESTIVE_TRACT	NA	NA	NA	0	WT	1.84365	2.67559	2.73888	2.58628	NA	NA	NA	Low	NA	Low_NA
BRD:BRD-K30577245-341-01-9	ACH-000733	0.356152	DOCETAXEL	2.5	NCIH1838_LUNG	Female	LUNG	Lung	Non-Small Cell Lung Carcinoma	Lung Adenocarcinoma	2	Mutant	3.91338	6.05241	4.35149	4.08544	4.37394	3.57244	NA	High	Low	High_Low
BRD:BRD-K30577245-341-01-9	ACH-000734	-1.63198	DOCETAXEL	2.5	JHH5_LIVER	Unknown	LIVER	NA	NA	NA	0	WT	3.67351	5.68897	3.56357	3.60864	NA	NA	NA	High	NA	High_NA
BRD:BRD-K30577245-341-01-9	ACH-000735	-4.24769	DOCETAXEL	2.5	PECAPJ49_UPPER_AERODIGESTIVE_TRACT	Unknown	UPPER_AERODIGESTIVE_TRACT	NA	NA	NA	0	WT	2.43183	0.395719	4.03962	3.49457	NA	NA	NA	Low	NA	Low_NA
BRD:BRD-K30577245-341-01-9	ACH-000736	-2.6464	DOCETAXEL	2.5	SNU601_STOMACH	Unknown	STOMACH	NA	NA	NA	2	Mutant	3.33196	6.51585	3.95713	4.36886	NA	NA	NA	Low	NA	Low_NA
BRD:BRD-K30577245-341-01-9	ACH-000738	-0.602919	DOCETAXEL	2.5	GB1_CENTRAL_NERVOUS_SYSTEM	Male	CENTRAL_NERVOUS_SYSTEM	Central Nervous System	Glioblastoma	NA	0	WT	3.54482	7.34234	4.60618	4.36744	4.1787	3.61688	NA	High	Low	High_Low
BRD:BRD-K30577245-341-01-9	ACH-000739	1.23659	DOCETAXEL	2.5	HEPG2_LIVER	Unknown	LIVER	NA	NA	NA	0	WT	3.7748	4.8752	2.50204	3.57706	NA	NA	NA	High	NA	High_NA
BRD:BRD-K30577245-341-01-9	ACH-000740	-2.29201	DOCETAXEL	2.5	A253_SALIVARY_GLAND	Male	SALIVARY_GLAND	Head and Neck	Head and Neck Carcinoma	Salivary gland squamous cell carcinoma	0	WT	3.42185	3.02488	3.70741	4.0614	NA	3.22208	NA	High	Low	High_Low
BRD:BRD-K30577245-341-01-9	ACH-000741	-3.59289	DOCETAXEL	2.5	UBLC1_URINARY_TRACT	Unknown	URINARY_TRACT	NA	NA	NA	2	Mutant	4.34287	3.72902	2.43541	4.18763	NA	NA	NA	High	NA	High_NA
BRD:BRD-K30577245-341-01-9	ACH-000744	-1.42828	DOCETAXEL	2.5	NCIH1623_LUNG	Male	LUNG	Lung	Non-Small Cell Lung Carcinoma	Lung Adenocarcinoma	2	Mutant	3.69391	4.74868	4.36106	4.80908	NA	3.76787	NA	High	Low	High_Low
BRD:BRD-K30577245-341-01-9	ACH-000747	-3.64131	DOCETAXEL	2.5	NCIH1703_LUNG	Male	LUNG	Lung	Non-Small Cell Lung Carcinoma	Squamous Cell Lung Carcinoma	0	WT	2.77535	4.25988	5.38015	3.92022	NA	4.55518	NA	Low	High	Low_High
BRD:BRD-K30577245-341-01-9	ACH-000748	-2.821	DOCETAXEL	2.5	SJSA1_BONE	Male	BONE	Bone	Osteosarcoma	NA	0	WT	4.28765	5.89188	4.59804	2.84136	NA	3.68404	NA	High	Low	High_Low
BRD:BRD-K30577245-341-01-9	ACH-000749	-2.28893	DOCETAXEL	2.5	DMS273_LUNG	Female	LUNG	Lung	Small Cell Lung Carcinoma	NA	2	Mutant	4.05595	5.30135	3.35473	3.7095	2.13165	3.09509	NA	High	Low	High_Low
BRD:BRD-K30577245-341-01-9	ACH-000750	-4.14718	DOCETAXEL	2.5	LOXIMVI_SKIN	Male	SKIN	Skin	Melanoma	Cutaneous melanoma	0	WT	2.91205	4.73692	4.50661	4.02464	NA	3.93512	NA	Low	High	Low_High
BRD:BRD-K30577245-341-01-9	ACH-000753	-2.87443	DOCETAXEL	2.5	JMSU1_URINARY_TRACT	Unknown	URINARY_TRACT	NA	NA	NA	1	Mutant	2.98457	6.20936	5.3589	3.78054	NA	NA	NA	Low	NA	Low_NA
BRD:BRD-K30577245-341-01-9	ACH-000756	-2.79209	DOCETAXEL	2.5	GI1_CENTRAL_NERVOUS_SYSTEM	Male	CENTRAL_NERVOUS_SYSTEM	Central Nervous System	Glioblastoma	NA	2	Mutant	2.89564	5.82525	6.20397	3.73958	2.46095	4.9769	NA	Low	High	Low_High
BRD:BRD-K30577245-341-01-9	ACH-000758	-0.138787	DOCETAXEL	2.5	MKN74_STOMACH	Unknown	STOMACH	NA	NA	NA	2	Mutant	4.58057	7.29223	6.03484	5.33057	NA	NA	NA	High	NA	High_NA
BRD:BRD-K30577245-341-01-9	ACH-000759	-1.01111	DOCETAXEL	2.5	MDAMB175VII_BREAST	Female	BREAST	Breast	Breast Carcinoma	Invasive Ductal Carcinoma of No Special Type	0	WT	3.09108	3.89565	4.35469	2.34751	NA	4.19664	NA	Low	High	Low_High
BRD:BRD-K30577245-341-01-9	ACH-000762	-4.09558	DOCETAXEL	2.5	YD38_UPPER_AERODIGESTIVE_TRACT	Unknown	UPPER_AERODIGESTIVE_TRACT	NA	NA	NA	2	Mutant	3.03045	2.83966	2.97734	3.90403	NA	NA	NA	Low	NA	Low_NA
BRD:BRD-K30577245-341-01-9	ACH-000764	-5.06479	DOCETAXEL	2.5	SH10TC_STOMACH	Unknown	STOMACH	NA	NA	NA	2	Mutant	3.03379	5.14704	4.66146	3.7095	NA	NA	NA	Low	NA	Low_NA
BRD:BRD-K30577245-341-01-9	ACH-000765	-3.36953	DOCETAXEL	2.5	WM983B_SKIN	Unknown	SKIN	NA	NA	NA	2	Mutant	3.94338	6.12187	4.82508	3.04384	NA	NA	NA	High	NA	High_NA
BRD:BRD-K30577245-341-01-9	ACH-000766	-1.38137	DOCETAXEL	2.5	NCIH1648_LUNG	Male	LUNG	Lung	Non-Small Cell Lung Carcinoma	Lung Adenocarcinoma	0	WT	2.82234	4.5625	4.93747	4.48638	NA	5.4241	1.92442	Low	High	Low_High
BRD:BRD-K30577245-341-01-9	ACH-000768	-1.0681	DOCETAXEL	2.5	MDAMB231_BREAST	Female	BREAST	Breast	Breast Carcinoma	Breast adenocarcinoma	2	Mutant	3.60038	5.46329	3.17219	4.24709	5.16195	3.12457	NA	High	Low	High_Low
BRD:BRD-K30577245-341-01-9	ACH-000769	-4.13229	DOCETAXEL	2.5	LK2_LUNG	Male	LUNG	Lung	Non-Small Cell Lung Carcinoma	Squamous Cell Lung Carcinoma	2	Mutant	4.76212	5.87562	4.09601	5.93551	2.22237	4.04963	NA	High	High	High_High
BRD:BRD-K30577245-341-01-9	ACH-000771	-1.20362	DOCETAXEL	2.5	BICR56_UPPER_AERODIGESTIVE_TRACT	Unknown	UPPER_AERODIGESTIVE_TRACT	NA	NA	NA	0	WT	1.36541	4.64513	3.23774	2.28093	NA	NA	NA	Low	NA	Low_NA
BRD:BRD-K30577245-341-01-9	ACH-000774	0.0280994	DOCETAXEL	2.5	RERFLCAD2_LUNG	Unknown	LUNG	NA	NA	NA	2	Mutant	2.6158	5.25267	3.67871	3.37279	NA	NA	NA	Low	NA	Low_NA
BRD:BRD-K30577245-341-01-9	ACH-000775	-0.0849047	DOCETAXEL	2.5	NCIH727_LUNG	Female	LUNG	Lung	Carcinoid Tumour	Lung Carcinoid Tumor	0	WT	4.17827	5.55909	3.95962	4.77229	2.38155	2.95176	NA	High	Low	High_Low
BRD:BRD-K30577245-341-01-9	ACH-000776	-0.96352	DOCETAXEL	2.5	ONS76_CENTRAL_NERVOUS_SYSTEM	Female	CENTRAL_NERVOUS_SYSTEM	Central Nervous System	Other Solid Carcinomas	Medulloblastoma	0	WT	3.1979	5.03121	4.40992	2.10844	NA	2.94707	NA	Low	Low	Low_Low
BRD:BRD-K30577245-341-01-9	ACH-000777	-2.50135	DOCETAXEL	2.5	KYSE30_OESOPHAGUS	Unknown	OESOPHAGUS	NA	NA	NA	1	Mutant	3.20831	4.27891	4.32564	4.24402	NA	NA	NA	Low	NA	Low_NA
BRD:BRD-K30577245-341-01-9	ACH-000778	-1.80149	DOCETAXEL	2.5	HSC3_UPPER_AERODIGESTIVE_TRACT	Male	UPPER_AERODIGESTIVE_TRACT	Head and Neck	Head and Neck Carcinoma	Tongue Squamous Cell Carcinoma	0	WT	3.18289	2.14341	3.41655	3.73212	NA	3.39282	NA	High	Low	High_Low
BRD:BRD-K30577245-341-01-9	ACH-000781	-3.71681	DOCETAXEL	2.5	NCIH2023_LUNG	Male	LUNG	Lung	Non-Small Cell Lung Carcinoma	Squamous Cell Lung Carcinoma	0	WT	3.06517	4.39642	4.76486	3.84947	NA	3.13285	NA	Low	Low	Low_Low
BRD:BRD-K30577245-341-01-9	ACH-000783	-1.66777	DOCETAXEL	2.5	CAMA1_BREAST	Female	BREAST	Breast	Breast Carcinoma	Breast adenocarcinoma	2	Mutant	3.78586	5.43254	5.33734	3.78778	NA	5.10317	NA	High	High	High_High
BRD:BRD-K30577245-341-01-9	ACH-000784	-1.28845	DOCETAXEL	2.5	KYSE70_OESOPHAGUS	Male	OESOPHAGUS	Esophagus	Esophageal Carcinoma	Esophageal Squamous Cell Carcinoma	1	Mutant	3.31964	4.82798	4.25222	5.21475	3.41138	4.35543	1.43501	Low	High	Low_High
BRD:BRD-K30577245-341-01-9	ACH-000785	-4.16449	DOCETAXEL	2.5	NCIH2126_LUNG	Unknown	LUNG	NA	NA	NA	2	Mutant	4.10836	3.28151	4.54768	4.98482	NA	NA	NA	High	NA	High_NA
BRD:BRD-K30577245-341-01-9	ACH-000787	-1.88403	DOCETAXEL	2.5	LXF289_LUNG	Male	LUNG	Lung	Non-Small Cell Lung Carcinoma	Lung Adenocarcinoma	2	Mutant	3.59241	6.43694	4.14525	4.92644	3.98107	3.83162	NA	High	Low	High_Low
BRD:BRD-K30577245-341-01-9	ACH-000788	-3.0046	DOCETAXEL	2.5	A2058_SKIN	Male	SKIN	Skin	Melanoma	Cutaneous melanoma	2	Mutant	3.52582	5.86553	4.25495	4.3844	NA	3.9744	NA	High	High	High_High
BRD:BRD-K30577245-341-01-9	ACH-000791	-1.7773	DOCETAXEL	2.5	RERFLCAD1_LUNG	Unknown	LUNG	NA	NA	NA	2	Mutant	4.35721	6.06332	5.05663	4.79835	NA	NA	NA	High	NA	High_NA
BRD:BRD-K30577245-341-01-9	ACH-000792	-4.0014	DOCETAXEL	2.5	BFTC909_KIDNEY	Male	KIDNEY	Kidney	Kidney Carcinoma	Renal pelvis and ureter urothelial carcinoma	2	Mutant	3.01869	4.69062	4.81662	3.26251	3.47011	4.27258	NA	Low	High	Low_High
BRD:BRD-K30577245-341-01-9	ACH-000794	-3.04691	DOCETAXEL	2.5	BICR22_UPPER_AERODIGESTIVE_TRACT	Male	UPPER_AERODIGESTIVE_TRACT	Head and Neck	Head and Neck Carcinoma	Tongue Squamous Cell Carcinoma	0	WT	2.00996	2.42546	2.33935	1.93491	NA	3.79648	NA	Low	Low	Low_Low
BRD:BRD-K30577245-341-01-9	ACH-000796	-4.29322	DOCETAXEL	2.5	MCAS_OVARY	Female	OVARY	NA	NA	NA	0	WT	3.27356	6.22479	4.08	4.54704	NA	NA	NA	High	NA	High_NA
BRD:BRD-K30577245-341-01-9	ACH-000800	-2.55405	DOCETAXEL	2.5	NCIH446_LUNG	Male	LUNG	Lung	Small Cell Lung Carcinoma	NA	2	Mutant	4.31237	5.88565	4.29004	4.82451	2.23232	3.90463	0.79667	High	Low	High_Low
BRD:BRD-K30577245-341-01-9	ACH-000802	-2.4515	DOCETAXEL	2.5	BFTC905_URINARY_TRACT	Female	URINARY_TRACT	Bladder	Bladder Carcinoma	Urothelial carcinoma	0	WT	3.78084	3.07595	3.61756	4.34237	NA	3.84949	NA	High	Low	High_Low
BRD:BRD-K30577245-341-01-9	ACH-000803	-2.42654	DOCETAXEL	2.5	COLO668_LUNG	Female	LUNG	Lung	Small Cell Lung Carcinoma	NA	1	Mutant	5.11876	5.14785	4.54542	3.9002	1.72051	3.65473	NA	High	Low	High_Low
BRD:BRD-K30577245-341-01-9	ACH-000804	-2.92763	DOCETAXEL	2.5	NB1_AUTONOMIC_GANGLIA	Male	AUTONOMIC_GANGLIA	Peripheral Nervous System	Neuroblastoma	NA	0	WT	3.89023	5.69579	4.84971	3.28406	NA	5.26113	NA	High	High	High_High
BRD:BRD-K30577245-341-01-9	ACH-000805	-2.58282	DOCETAXEL	2.5	COLO679_SKIN	Female	SKIN	Skin	Melanoma	Cutaneous melanoma	0	WT	3.39989	4.00341	3.70839	3.87504	NA	2.45261	NA	High	Low	High_Low
BRD:BRD-K30577245-341-01-9	ACH-000808	0.127287	DOCETAXEL	2.5	HUH28_BILIARY_TRACT	Unknown	BILIARY_TRACT	NA	NA	NA	2	Mutant	3.1524	5.81035	4.07617	3.44777	NA	NA	NA	Low	NA	Low_NA
BRD:BRD-K30577245-341-01-9	ACH-000809	-3.82091	DOCETAXEL	2.5	KYSE410_OESOPHAGUS	Male	OESOPHAGUS	Esophagus	Esophageal Carcinoma	Esophageal Squamous Cell Carcinoma	2	Mutant	3.16772	4.40514	4.50371	3.92117	NA	3.9325	NA	Low	Low	Low_Low
BRD:BRD-K30577245-341-01-9	ACH-000810	-0.186865	DOCETAXEL	2.5	SKMEL30_SKIN	Male	SKIN	Skin	Melanoma	Cutaneous melanoma	1	Mutant	3.2333	3.98937	3.14686	2.86583	NA	2.90575	NA	Low	Low	Low_Low
BRD:BRD-K30577245-341-01-9	ACH-000811	-2.81824	DOCETAXEL	2.5	SKOV3_OVARY	Female	OVARY	Ovary	Ovarian Carcinoma	Ovarian Cystadenocarcinoma	0	WT	4.12834	1.81852	5.79165	4.68387	NA	4.16043	NA	High	High	High_High
BRD:BRD-K30577245-341-01-9	ACH-000812	-3.72817	DOCETAXEL	2.5	COLO783_SKIN	Female	SKIN	Skin	Melanoma	NA	0	WT	4.00074	5.61485	4.83721	4.64811	NA	5.14326	NA	High	High	High_High
BRD:BRD-K30577245-341-01-9	ACH-000813	-1.2766	DOCETAXEL	2.5	T3M10_LUNG	Unknown	LUNG	NA	NA	NA	2	Mutant	3.44728	4.92429	4.11934	4.65816	NA	NA	NA	Low	NA	Low_NA
BRD:BRD-K30577245-341-01-9	ACH-000814	-2.04337	DOCETAXEL	2.5	HS939T_SKIN	Female	SKIN	Skin	Melanoma	NA	0	WT	3.48462	4.51538	3.84414	3.85046	NA	3.07229	NA	High	Low	High_Low
BRD:BRD-K30577245-341-01-9	ACH-000819	-2.46271	DOCETAXEL	2.5	LN18_CENTRAL_NERVOUS_SYSTEM	Male	CENTRAL_NERVOUS_SYSTEM	Central Nervous System	Glioblastoma	NA	2	Mutant	3.91704	5.6921	5.08412	4.78701	NA	4.08073	NA	High	Low	High_Low
BRD:BRD-K30577245-341-01-9	ACH-000822	-3.0906	DOCETAXEL	2.5	SKMEL24_SKIN	Male	SKIN	Skin	Melanoma	NA	0	WT	3.10069	5.10186	4.24123	3.04883	NA	3.39519	NA	Low	Low	Low_Low
BRD:BRD-K30577245-341-01-9	ACH-000823	-0.812785	DOCETAXEL	2.5	KYSE140_OESOPHAGUS	Male	OESOPHAGUS	Esophagus	Esophageal Carcinoma	Esophageal Squamous Cell Carcinoma	2	Mutant	3.07494	6.27998	4.53978	3.66882	4.05443	4.43463	NA	Low	High	Low_High
BRD:BRD-K30577245-341-01-9	ACH-000824	-5.73619	DOCETAXEL	2.5	KYSE510_OESOPHAGUS	Female	OESOPHAGUS	Esophagus	Esophageal Carcinoma	Esophageal Squamous Cell Carcinoma	1	Mutant	3.59811	3.9734	4.23433	4.18204	NA	3.91382	0.77211	High	Low	High_Low
BRD:BRD-K30577245-341-01-9	ACH-000826	-1.63981	DOCETAXEL	2.5	CAL12T_LUNG	Male	LUNG	Lung	Non-Small Cell Lung Carcinoma	NA	2	Mutant	3.23038	6.47927	4.9182	4.63501	3.71181	4.68146	2.80573	Low	High	Low_High
BRD:BRD-K30577245-341-01-9	ACH-000827	-3.53553	DOCETAXEL	2.5	WM793_SKIN	Male	SKIN	Skin	Melanoma	NA	0	WT	2.49092	4.94359	4.33927	3.89539	NA	3.57036	NA	Low	Low	Low_Low
BRD:BRD-K30577245-341-01-9	ACH-000832	-3.13701	DOCETAXEL	2.5	CAL27_UPPER_AERODIGESTIVE_TRACT	Male	UPPER_AERODIGESTIVE_TRACT	Head and Neck	Head and Neck Carcinoma	Tongue Squamous Cell Carcinoma	2	Mutant	3.04874	6.13251	3.96872	3.32212	3.39928	4.16388	NA	Low	High	Low_High
BRD:BRD-K30577245-341-01-9	ACH-000833	-2.01156	DOCETAXEL	2.5	RH30_SOFT_TISSUE	Unknown	SOFT_TISSUE	NA	NA	NA	2	Mutant	3.4435	5.40355	3.50982	4.5305	NA	NA	NA	Low	NA	Low_NA
BRD:BRD-K30577245-341-01-9	ACH-000834	-5.21242	DOCETAXEL	2.5	UMUC1_URINARY_TRACT	Unknown	URINARY_TRACT	NA	NA	NA	2	Mutant	3.26074	5.88864	3.55275	3.28121	NA	NA	NA	Low	NA	Low_NA
BRD:BRD-K30577245-341-01-9	ACH-000835	-4.00825	DOCETAXEL	2.5	GCT_SOFT_TISSUE	Male	SOFT_TISSUE	Soft Tissue	Other Sarcomas	Undifferentiated pleomorphic sarcoma	1	Mutant	3.20831	5.18852	5.04695	4.20271	NA	3.79399	NA	Low	Low	Low_Low
BRD:BRD-K30577245-341-01-9	ACH-000836	-2.3277	DOCETAXEL	2.5	YD15_SALIVARY_GLAND	Unknown	SALIVARY_GLAND	NA	NA	NA	2	Mutant	3.27922	5.42441	4.19151	3.65764	NA	NA	NA	Low	NA	Low_NA
BRD:BRD-K30577245-341-01-9	ACH-000837	-2.67807	DOCETAXEL	2.5	NCIH322_LUNG	Male	LUNG	Lung	Non-Small Cell Lung Carcinoma	Lung Adenocarcinoma	2	Mutant	2.70819	5.5822	4.49033	4.15458	2.24357	4.90727	1.96293	Low	High	Low_High
BRD:BRD-K30577245-341-01-9	ACH-000839	-5.26648	DOCETAXEL	2.5	SCABER_URINARY_TRACT	Unknown	URINARY_TRACT	NA	NA	NA	2	Mutant	1.91673	4.43363	3.27079	2.86956	NA	NA	NA	Low	NA	Low_NA
BRD:BRD-K30577245-341-01-9	ACH-000840	-2.8597	DOCETAXEL	2.5	NA	Female	NA	Lung	Non-Small Cell Lung Carcinoma	Adenosquamous lung carcinoma	2	Mutant	3.39467	5.93238	3.92011	5.50399	NA	3.3647	1.69244	High	Low	High_Low
BRD:BRD-K30577245-341-01-9	ACH-000841	-2.68005	DOCETAXEL	2.5	NCIH2087_LUNG	Male	LUNG	Lung	Non-Small Cell Lung Carcinoma	Lung Adenocarcinoma	2	Mutant	3.77581	7.06502	4.93572	4.42052	3.54532	3.91139	NA	High	Low	High_Low
BRD:BRD-K30577245-341-01-9	ACH-000842	-1.5532	DOCETAXEL	2.5	SW480_LARGE_INTESTINE	Unknown	LARGE_INTESTINE	NA	NA	NA	2	Mutant	2.9066	5.26932	2.60897	3.53272	NA	NA	NA	Low	NA	Low_NA
BRD:BRD-K30577245-341-01-9	ACH-000843	-0.952182	DOCETAXEL	2.5	HARA_LUNG	Male	LUNG	Lung	Non-Small Cell Lung Carcinoma	Squamous Cell Lung Carcinoma	2	Mutant	3.44728	5.638	4.63407	4.43894	NA	4.6809	NA	Low	High	Low_High
BRD:BRD-K30577245-341-01-9	ACH-000845	-1.21336	DOCETAXEL	2.5	NCIH1373_LUNG	Unknown	LUNG	NA	NA	NA	2	Mutant	2.89564	2.85287	4.65099	2.88623	NA	NA	NA	Low	NA	Low_NA
BRD:BRD-K30577245-341-01-9	ACH-000846	-3.15158	DOCETAXEL	2.5	FADU_UPPER_AERODIGESTIVE_TRACT	Male	UPPER_AERODIGESTIVE_TRACT	Head and Neck	Head and Neck Carcinoma	Hypopharyngeal squamous cell carcinoma	1	Mutant	3.65283	5.10899	5.47823	3.96136	3.11668	4.02413	NA	High	High	High_High
BRD:BRD-K30577245-341-01-9	ACH-000847	-1.63382	DOCETAXEL	2.5	HGC27_STOMACH	Unknown	STOMACH	Stomach	Gastric Carcinoma	NA	0	WT	3.69497	2.18207	4.20921	3.81133	NA	3.58014	NA	Low	High	Low_High
BRD:BRD-K30577245-341-01-9	ACH-000848	-3.88427	DOCETAXEL	2.5	JHH7_LIVER	Male	LIVER	Liver	Hepatocellular Carcinoma	NA	2	Mutant	4.55287	5.27833	4.2699	4.61212	NA	3.53453	NA	High	Low	High_Low
BRD:BRD-K30577245-341-01-9	ACH-000849	-4.2634	DOCETAXEL	2.5	MDAMB468_BREAST	Female	BREAST	Breast	Breast Carcinoma	Breast adenocarcinoma	2	Mutant	3.8921	6.53948	3.915	4.96125	4.11236	3.31671	NA	High	Low	High_Low
BRD:BRD-K30577245-341-01-9	ACH-000852	0.739897	DOCETAXEL	2.5	NCIH1435_LUNG	Female	LUNG	Lung	Non-Small Cell Lung Carcinoma	Lung adenocarcinoma	2	Mutant	3.96038	4.64912	4.33862	3.06534	NA	3.14607	NA	High	Low	High_Low
BRD:BRD-K30577245-341-01-9	ACH-000853	-2.66099	DOCETAXEL	2.5	NCIH661_LUNG	Male	LUNG	Lung	Non-Small Cell Lung Carcinoma	Lung large cell carcinoma	2	Mutant	3.43843	5.45466	5.08334	4.914	NA	4.55711	NA	Low	High	Low_High
BRD:BRD-K30577245-341-01-9	ACH-000855	-2.14066	DOCETAXEL	2.5	KYSE150_OESOPHAGUS	Female	OESOPHAGUS	Esophagus	Esophageal Carcinoma	Esophageal Squamous Cell Carcinoma	1	Mutant	4.06675	6.00771	4.44042	5.31714	3.74264	3.92524	-0.18587	High	Low	High_Low
BRD:BRD-K30577245-341-01-9	ACH-000856	-1.00927	DOCETAXEL	2.5	CAL51_BREAST	Female	BREAST	Breast	Breast Carcinoma	NA	0	WT	4.16595	6.34006	5.33867	5.33401	NA	3.39934	NA	High	Low	High_Low
BRD:BRD-K30577245-341-01-9	ACH-000858	-1.66542	DOCETAXEL	2.5	KNS62_LUNG	Male	LUNG	Lung	Non-Small Cell Lung Carcinoma	Squamous Cell Lung Carcinoma	2	Mutant	2.17741	5.02901	3.53967	3.77223	2.66006	3.78524	1.65068	Low	Low	Low_Low
BRD:BRD-K30577245-341-01-9	ACH-000859	-6.27031	DOCETAXEL	2.5	HCC1954_BREAST	Female	BREAST	Breast	Breast Carcinoma	Ductal Breast Carcinoma	2	Mutant	3.1662	6.61007	4.55833	4.86062	3.08361	3.94411	NA	Low	High	Low_High
BRD:BRD-K30577245-341-01-9	ACH-000860	-3.75862	DOCETAXEL	2.5	NCIH358_LUNG	Male	LUNG	Lung	Non-Small Cell Lung Carcinoma	Lung Adenocarcinoma	0	WT	3.49442	3.04981	5.50777	4.07861	NA	4.89501	NA	High	High	High_High
BRD:BRD-K30577245-341-01-9	ACH-000862	-3.13503	DOCETAXEL	2.5	KMBC2_URINARY_TRACT	Unknown	URINARY_TRACT	NA	NA	NA	2	Mutant	3.95414	4.96908	5.09553	4.42942	NA	NA	NA	High	NA	High_NA
BRD:BRD-K30577245-341-01-9	ACH-000863	-2.50491	DOCETAXEL	2.5	DBTRG05MG_CENTRAL_NERVOUS_SYSTEM	Female	CENTRAL_NERVOUS_SYSTEM	Central Nervous System	Glioblastoma	NA	0	WT	3.00173	4.71204	4.47683	4.28576	NA	4.3224	NA	Low	High	Low_High
BRD:BRD-K30577245-341-01-9	ACH-000866	-3.39279	DOCETAXEL	2.5	NCIH1048_LUNG	Female	LUNG	Lung	Small Cell Lung Carcinoma	NA	1	Mutant	5.22726	5.65383	5.54171	5.47082	2.5666	5.05732	NA	High	High	High_High
BRD:BRD-K30577245-341-01-9	ACH-000868	0.902706	DOCETAXEL	2.5	HCC1195_LUNG	Unknown	LUNG	NA	NA	NA	0	WT	4.22954	5.64652	4.24879	4.95979	NA	NA	NA	High	NA	High_NA
BRD:BRD-K30577245-341-01-9	ACH-000869	-1.84245	DOCETAXEL	2.5	NCIH1568_LUNG	Female	LUNG	Lung	Non-Small Cell Lung Carcinoma	Lung Adenocarcinoma	2	Mutant	3.97718	4.9224	4.22182	5.77526	NA	3.63799	NA	High	Low	High_Low
BRD:BRD-K30577245-341-01-9	ACH-000873	-3.56043	DOCETAXEL	2.5	KYSE270_OESOPHAGUS	Male	OESOPHAGUS	Esophagus	Esophageal Carcinoma	Esophageal Squamous Cell Carcinoma	0	WT	3.13069	3.0432	3.4366	4.26237	NA	4.38365	0.17048	Low	High	Low_High
BRD:BRD-K30577245-341-01-9	ACH-000875	-0.0561485	DOCETAXEL	2.5	NCIH2347_LUNG	Female	LUNG	Lung	Non-Small Cell Lung Carcinoma	Lung Adenocarcinoma	2	Mutant	2.53374	2.79737	2.89749	2.99821	NA	2.99349	NA	Low	Low	Low_Low
BRD:BRD-K30577245-341-01-9	ACH-000878	-3.92677	DOCETAXEL	2.5	HCC15_LUNG	Male	LUNG	Lung	Non-Small Cell Lung Carcinoma	Squamous Cell Lung Carcinoma	2	Mutant	4.3808	5.34529	4.20639	6.0777	4.13417	3.43381	NA	High	Low	High_Low
BRD:BRD-K30577245-341-01-9	ACH-000879	-4.26289	DOCETAXEL	2.5	MFE296_ENDOMETRIUM	Female	ENDOMETRIUM	Endometrium	Endometrial Carcinoma	Endometrial adenocarcinoma	2	Mutant	3.71508	5.00227	5.39855	4.80158	NA	4.74884	NA	High	Low	High_Low
BRD:BRD-K30577245-341-01-9	ACH-000880	-1.02471	DOCETAXEL	2.5	AGS_STOMACH	Female	STOMACH	Stomach	Gastric Carcinoma	Gastric adenocarcinoma	0	WT	3.40379	5.28431	4.88659	4.75744	NA	4.08573	NA	Low	High	Low_High
BRD:BRD-K30577245-341-01-9	ACH-000881	-3.10689	DOCETAXEL	2.5	MELJUSO_SKIN	Female	SKIN	Skin	Melanoma	Cutaneous melanoma	0	WT	3.19191	5.39042	3.79222	3.54121	NA	3.3179	NA	Low	Low	Low_Low
BRD:BRD-K30577245-341-01-9	ACH-000882	-1.72167	DOCETAXEL	2.5	IGR1_SKIN	Male	SKIN	Skin	Melanoma	NA	0	WT	3.54718	3.24577	4.64625	3.59235	NA	4.01697	NA	High	High	High_High
BRD:BRD-K30577245-341-01-9	ACH-000883	-1.43719	DOCETAXEL	2.5	SW1783_CENTRAL_NERVOUS_SYSTEM	Male	CENTRAL_NERVOUS_SYSTEM	Central Nervous System	Glioma	Low Grade Glioma	2	Mutant	3.07332	5.638	4.66303	3.99693	4.88772	3.67577	NA	Low	Low	Low_Low
BRD:BRD-K30577245-341-01-9	ACH-000884	-4.61587	DOCETAXEL	2.5	MDAMB435S_SKIN	Unknown	SKIN	NA	NA	NA	1	Mutant	3.74627	6.19153	4.29071	4.52409	NA	NA	NA	High	NA	High_NA
BRD:BRD-K30577245-341-01-9	ACH-000885	-2.83256	DOCETAXEL	2.5	TOV21G_OVARY	Female	OVARY	Ovary	Ovarian Carcinoma	Ovarian clear cell adenocarcinoma	0	WT	3.51863	5.48757	4.89512	4.64395	NA	5.06559	NA	High	High	High_High
BRD:BRD-K30577245-341-01-9	ACH-000886	-3.03025	DOCETAXEL	2.5	NCIH2009_LUNG	Female	LUNG	Lung	Non-Small Cell Lung Carcinoma	Lung Adenocarcinoma	2	Mutant	3.36432	5.93987	4.42097	4.00592	4.49016	3.55201	NA	Low	Low	Low_Low
BRD:BRD-K30577245-341-01-9	ACH-000888	-1.20422	DOCETAXEL	2.5	NCIH1793_LUNG	Female	LUNG	Lung	Non-Small Cell Lung Carcinoma	Lung Adenocarcinoma	1	Mutant	3.93254	4.02424	4.88479	4.10322	NA	4.13051	NA	High	High	High_High
BRD:BRD-K30577245-341-01-9	ACH-000890	-3.50604	DOCETAXEL	2.5	SW1271_LUNG	Male	LUNG	Lung	Small Cell Lung Carcinoma	NA	2	Mutant	3.28768	6.82797	4.24948	3.67992	5.28439	3.28598	NA	Low	Low	Low_Low
BRD:BRD-K30577245-341-01-9	ACH-000891	-4.90874	DOCETAXEL	2.5	HCC1438_LUNG	Unknown	LUNG	NA	NA	NA	0	WT	4.25306	2.90276	5.70848	5.02023	NA	NA	NA	High	NA	High_NA
BRD:BRD-K30577245-341-01-9	ACH-000892	-0.874173	DOCETAXEL	2.5	NCIH1563_LUNG	Male	LUNG	Lung	Non-Small Cell Lung Carcinoma	Lung Adenocarcinoma	0	WT	3.44223	4.70055	4.60672	4.03611	NA	3.80468	NA	Low	Low	Low_Low
BRD:BRD-K30577245-341-01-9	ACH-000893	-2.77714	DOCETAXEL	2.5	NCIH1651_LUNG	Male	LUNG	Lung	Non-Small Cell Lung Carcinoma	Lung Adenocarcinoma	2	Mutant	4.32701	6.08426	5.82905	5.03278	3.11851	4.30848	NA	High	High	High_High
BRD:BRD-K30577245-341-01-9	ACH-000895	-2.07683	DOCETAXEL	2.5	CL34_LARGE_INTESTINE	Unknown	LARGE_INTESTINE	NA	NA	NA	1	Mutant	3.74215	6.23927	3.65759	3.63959	NA	NA	NA	High	NA	High_NA
BRD:BRD-K30577245-341-01-9	ACH-000896	-3.35083	DOCETAXEL	2.5	647V_URINARY_TRACT	Male	URINARY_TRACT	Bladder	Bladder Carcinoma	NA	1	Mutant	3.65502	5.6938	3.95297	4.39839	NA	3.11197	NA	High	Low	High_Low
BRD:BRD-K30577245-341-01-9	ACH-000897	-3.14723	DOCETAXEL	2.5	FTC238_THYROID	Unknown	THYROID	NA	NA	NA	2	Mutant	3.1197	5.67352	4.72884	4.03874	NA	NA	NA	Low	NA	Low_NA
BRD:BRD-K30577245-341-01-9	ACH-000898	-2.87789	DOCETAXEL	2.5	SNU719_STOMACH	Unknown	STOMACH	NA	NA	NA	0	WT	4.59509	5.99057	3.8225	4.194	NA	NA	NA	High	NA	High_NA
BRD:BRD-K30577245-341-01-9	ACH-000899	-0.978121	DOCETAXEL	2.5	WM88_SKIN	Unknown	SKIN	NA	NA	NA	0	WT	3.80179	5.52994	5.36613	3.39819	NA	NA	NA	High	NA	High_NA
BRD:BRD-K30577245-341-01-9	ACH-000900	-3.76965	DOCETAXEL	2.5	NCIH23_LUNG	Male	LUNG	Lung	Non-Small Cell Lung Carcinoma	Lung Adenocarcinoma	2	Mutant	3.03546	4.91479	4.35085	3.42839	2.67889	4.4529	NA	Low	High	Low_High
BRD:BRD-K30577245-341-01-9	ACH-000901	-4.2411	DOCETAXEL	2.5	HCC1359_LUNG	Unknown	LUNG	NA	NA	NA	2	Mutant	2.87161	5.96732	4.48799	3.63048	NA	NA	NA	Low	NA	Low_NA
BRD:BRD-K30577245-341-01-9	ACH-000903	-1.83163	DOCETAXEL	2.5	FTC133_THYROID	Male	THYROID	Thyroid	Thyroid Gland Carcinoma	Thyroid gland follicular carcinoma	2	Mutant	2.29777	5.94947	5.61965	3.51437	1.17427	5.17453	NA	Low	High	Low_High
BRD:BRD-K30577245-341-01-9	ACH-000905	-2.60664	DOCETAXEL	2.5	5637_URINARY_TRACT	Male	URINARY_TRACT	Bladder	Bladder Carcinoma	NA	2	Mutant	2.62023	5.919	3.73461	3.62247	NA	3.45833	NA	Low	Low	Low_Low
BRD:BRD-K30577245-341-01-9	ACH-000906	-2.92288	DOCETAXEL	2.5	ES2_OVARY	Female	OVARY	Ovary	Ovarian Carcinoma	Ovarian clear cell adenocarcinoma	2	Mutant	2.71234	5.49892	4.02935	3.56639	3.07477	4.02938	NA	Low	Low	Low_Low
BRD:BRD-K30577245-341-01-9	ACH-000909	-1.14624	DOCETAXEL	2.5	JHUEM2_ENDOMETRIUM	Female	ENDOMETRIUM	NA	NA	NA	0	WT	4.17443	6.58957	5.02986	4.47051	NA	NA	NA	High	NA	High_NA
BRD:BRD-K30577245-341-01-9	ACH-000911	-3.85951	DOCETAXEL	2.5	NUGC3_STOMACH	Male	STOMACH	Stomach	Gastric Carcinoma	Gastric adenocarcinoma	2	Mutant	3.8553	6.06466	3.54295	4.31543	3.41685	3.40994	NA	High	Low	High_Low
BRD:BRD-K30577245-341-01-9	ACH-000913	-3.49403	DOCETAXEL	2.5	ESS1_ENDOMETRIUM	Female	ENDOMETRIUM	Soft Tissue	Other Sarcomas	Endometrial Stromal Sarcoma	2	Mutant	3.03879	4.10233	5.04493	4.68677	NA	4.21407	NA	Low	Low	Low_Low
BRD:BRD-K30577245-341-01-9	ACH-000915	-1.77289	DOCETAXEL	2.5	IPC298_SKIN	Female	SKIN	Skin	Melanoma	Cutaneous melanoma	2	Mutant	3.55774	2.20248	3.53638	3.63732	NA	2.81065	NA	High	Low	High_Low
BRD:BRD-K30577245-341-01-9	ACH-000916	-2.92903	DOCETAXEL	2.5	NCIH1573_LUNG	Female	LUNG	Lung	Non-Small Cell Lung Carcinoma	Lung Adenocarcinoma	2	Mutant	3.99293	4.97459	5.35395	3.93999	NA	4.96934	NA	High	High	High_High
BRD:BRD-K30577245-341-01-9	ACH-000917	-0.730091	DOCETAXEL	2.5	TE4_OESOPHAGUS	Female	OESOPHAGUS	Esophagus	Esophageal Carcinoma	Esophageal Squamous Cell Carcinoma	2	Mutant	3.66918	4.8796	5.27772	3.2274	2.69171	4.86848	NA	High	High	High_High
BRD:BRD-K30577245-341-01-9	ACH-000919	-3.43704	DOCETAXEL	2.5	IM95_STOMACH	Male	STOMACH	Stomach	Gastric Carcinoma	Gastric adenocarcinoma	0	WT	4.13151	5.12814	2.9994	4.20587	NA	2.59072	NA	High	Low	High_Low
BRD:BRD-K30577245-341-01-9	ACH-000921	-4.17305	DOCETAXEL	2.5	NCIH1339_LUNG	Unknown	LUNG	NA	NA	NA	1	Mutant	2.95493	3.67455	5.18383	4.6224	NA	NA	NA	Low	NA	Low_NA
BRD:BRD-K30577245-341-01-9	ACH-000924	-1.86508	DOCETAXEL	2.5	NCIH2172_LUNG	Female	LUNG	Lung	Non-Small Cell Lung Carcinoma	NA	0	WT	3.20979	3.30255	4.9067	4.27298	NA	4.79491	2.08447	Low	High	Low_High
BRD:BRD-K30577245-341-01-9	ACH-000926	-3.17693	DOCETAXEL	2.5	HT55_LARGE_INTESTINE	Unknown	LARGE_INTESTINE	Large Intestine	Colorectal Carcinoma	NA	0	WT	3.64734	5.80588	4.06692	3.4808	NA	4.05536	NA	Low	High	Low_High
BRD:BRD-K30577245-341-01-9	ACH-000927	-2.36783	DOCETAXEL	2.5	BT474_BREAST	Female	BREAST	Breast	Breast Carcinoma	Invasive Ductal Carcinoma of No Special Type	2	Mutant	3.44097	6.09821	3.49184	3.93437	2.81321	3.58819	NA	High	Low	High_Low
BRD:BRD-K30577245-341-01-9	ACH-000929	-2.14535	DOCETAXEL	2.5	NCIH2110_LUNG	Unknown	LUNG	Lung	Non-Small Cell Lung Carcinoma	NA	2	Mutant	3.7555	5.86351	4.03883	3.07516	3.17064	3.598	NA	High	Low	High_Low
BRD:BRD-K30577245-341-01-9	ACH-000934	-0.298548	DOCETAXEL	2.5	MDAMB361_BREAST	Female	BREAST	Breast	Breast Carcinoma	Breast adenocarcinoma	1	Mutant	3.42185	3.97874	4.39754	3.66324	NA	3.52295	NA	Low	Low	Low_Low
BRD:BRD-K30577245-341-01-9	ACH-000936	-0.585746	DOCETAXEL	2.5	EFO27_OVARY	Female	OVARY	Ovary	Ovarian Carcinoma	Ovarian mucinous adenocarcinoma	1	Mutant	3.16772	5.95545	4.44103	4.15539	2.94259	3.83147	NA	Low	Low	Low_Low
BRD:BRD-K30577245-341-01-9	ACH-000939	-4.30291	DOCETAXEL	2.5	SKUT1_SOFT_TISSUE	Female	SOFT_TISSUE	Soft Tissue	Leiomyosarcoma	Uterine Corpus Leiomyosarcoma	2	Mutant	3.80179	6.61407	5.00552	4.95201	4.0729	3.38202	NA	High	Low	High_Low
BRD:BRD-K30577245-341-01-9	ACH-000940	-3.92356	DOCETAXEL	2.5	AN3CA_ENDOMETRIUM	Female	ENDOMETRIUM	Endometrium	Endometrial Carcinoma	Endometrial adenocarcinoma	1	Mutant	3.70135	5.0691	5.86672	5.05667	NA	4.95691	NA	High	High	High_High
BRD:BRD-K30577245-341-01-9	ACH-000941	-0.273266	DOCETAXEL	2.5	HEC1B_ENDOMETRIUM	Female	ENDOMETRIUM	NA	NA	NA	2	Mutant	3.6583	6.32298	4.7876	3.63277	NA	NA	NA	High	NA	High_NA
BRD:BRD-K30577245-341-01-9	ACH-000943	-4.58914	DOCETAXEL	2.5	RKO_LARGE_INTESTINE	Unknown	LARGE_INTESTINE	Large Intestine	Colorectal Carcinoma	NA	0	WT	3.41414	3.20916	3.77451	3.90499	NA	3.28579	NA	Low	Low	Low_Low
BRD:BRD-K30577245-341-01-9	ACH-000945	-4.3343	DOCETAXEL	2.5	NCIH650_LUNG	Male	LUNG	Lung	Non-Small Cell Lung Carcinoma	Lung Adenocarcinoma	2	Mutant	3.2636	3.97786	5.44282	4.3014	NA	4.22009	NA	Low	High	Low_High
BRD:BRD-K30577245-341-01-9	ACH-000946	-3.779	DOCETAXEL	2.5	HEC265_ENDOMETRIUM	Female	ENDOMETRIUM	NA	NA	NA	0	WT	2.87533	5.18772	3.99246	3.83853	NA	NA	NA	Low	NA	Low_NA
BRD:BRD-K30577245-341-01-9	ACH-000947	-2.1682	DOCETAXEL	2.5	OVK18_OVARY	Female	OVARY	Ovary	Ovarian Carcinoma	Ovarian endometrioid adenocarcinoma	0	WT	3.99727	5.40768	4.62875	4.31543	NA	4.04931	NA	High	Low	High_Low
BRD:BRD-K30577245-341-01-9	ACH-000948	-4.06802	DOCETAXEL	2.5	2313287_STOMACH	Male	STOMACH	Stomach	Gastric Carcinoma	Gastric adenocarcinoma	0	WT	4.45702	6.3123	3.1326	4.0614	NA	NA	NA	High	NA	High_NA
BRD:BRD-K30577245-341-01-9	ACH-000950	-2.69584	DOCETAXEL	2.5	LOVO_LARGE_INTESTINE	Male	LARGE_INTESTINE	Large Intestine	Colorectal Carcinoma	Colon adenocarcinoma	0	WT	3.60718	5.06695	4.0646	4.23476	NA	4.28302	NA	Low	High	Low_High
BRD:BRD-K30577245-341-01-9	ACH-000954	-1.69651	DOCETAXEL	2.5	HEC1A_ENDOMETRIUM	Female	ENDOMETRIUM	NA	NA	NA	2	Mutant	3.78986	6.24813	4.58107	4.82451	NA	NA	NA	High	NA	High_NA
BRD:BRD-K30577245-341-01-9	ACH-000955	-3.66238	DOCETAXEL	2.5	SNU407_LARGE_INTESTINE	Male	LARGE_INTESTINE	Large Intestine	Colorectal Carcinoma	Colon adenocarcinoma	0	WT	3.93344	6.39624	5.43938	4.18204	NA	4.73236	NA	High	High	High_High
BRD:BRD-K30577245-341-01-9	ACH-000956	-2.32011	DOCETAXEL	2.5	22RV1_PROSTATE	Male	PROSTATE	Prostate	Prostate Carcinoma	NA	0	WT	4.36939	4.13551	4.36106	3.95766	NA	3.54269	NA	High	Low	High_Low
BRD:BRD-K30577245-341-01-9	ACH-000957	-0.969728	DOCETAXEL	2.5	LS180_LARGE_INTESTINE	Female	LARGE_INTESTINE	Large Intestine	Colorectal Carcinoma	Colon adenocarcinoma	0	WT	3.79981	6.39053	3.87077	4.23399	NA	3.84817	NA	High	Low	High_Low
BRD:BRD-K30577245-341-01-9	ACH-000959	-4.62176	DOCETAXEL	2.5	SNUC4_LARGE_INTESTINE	Unknown	LARGE_INTESTINE	NA	NA	NA	1	Mutant	4.44874	6.0956	4.16711	4.17963	NA	NA	NA	High	NA	High_NA
BRD:BRD-K30577245-341-01-9	ACH-000961	-4.24963	DOCETAXEL	2.5	ISHIKAWAHERAKLIO02ER_ENDOMETRIUM	Female	ENDOMETRIUM	NA	NA	NA	1	Mutant	4.01195	4.57629	4.91158	4.1258	NA	NA	NA	High	NA	High_NA
BRD:BRD-K30577245-341-01-9	ACH-000962	-2.98732	DOCETAXEL	2.5	OC314_OVARY	Female	OVARY	Ovary	Ovarian Carcinoma	Ovarian serous adenocarcinoma	2	Mutant	3.66484	5.71913	3.80973	4.65757	4.37555	3.7293	NA	High	Low	High_Low
BRD:BRD-K30577245-341-01-9	ACH-000963	-3.06788	DOCETAXEL	2.5	CCK81_LARGE_INTESTINE	Female	LARGE_INTESTINE	Large Intestine	Colorectal Carcinoma	Colon adenocarcinoma	1	Mutant	3.78686	6.47893	3.5031	4.17803	NA	3.0934	NA	High	Low	High_Low
BRD:BRD-K30577245-341-01-9	ACH-000965	-5.33459	DOCETAXEL	2.5	RL952_ENDOMETRIUM	Female	ENDOMETRIUM	Endometrium	Endometrial Carcinoma	Endometrial adenosquamous carcinoma	0	WT	3.48339	5.42814	4.78616	4.57464	NA	4.86843	NA	Low	Low	Low_Low
BRD:BRD-K30577245-341-01-9	ACH-000966	-2.79834	DOCETAXEL	2.5	IGROV1_OVARY	Female	OVARY	Ovary	Ovarian Carcinoma	Ovarian endometrioid adenocarcinoma	1	Mutant	3.8097	5.1161	4.59804	4.31101	NA	4.97933	NA	High	High	High_High
BRD:BRD-K30577245-341-01-9	ACH-000967	-4.0777	DOCETAXEL	2.5	SNUC2A_LARGE_INTESTINE	Unknown	LARGE_INTESTINE	NA	NA	NA	2	Mutant	4.46462	5.96543	5.15923	4.48243	NA	NA	NA	High	NA	High_NA
BRD:BRD-K30577245-341-01-9	ACH-000968	-1.24685	DOCETAXEL	2.5	COLO792_SKIN	Male	SKIN	Skin	Melanoma	NA	0	WT	2.94255	4.25619	3.26555	1.87953	NA	3.6784	NA	Low	Low	Low_Low
BRD:BRD-K30577245-341-01-9	ACH-000970	-1.95824	DOCETAXEL	2.5	NA	Female	NA	Large Intestine	Colorectal Carcinoma	Cecum adenocarcinoma	1	Mutant	4.0501	5.86654	4.90892	4.43962	3.16171	3.99442	NA	High	High	High_High
BRD:BRD-K30577245-341-01-9	ACH-000971	-2.72579	DOCETAXEL	2.5	HCT116_LARGE_INTESTINE	Male	LARGE_INTESTINE	Large Intestine	Colorectal Carcinoma	NA	0	WT	4.05512	4.92382	4.61482	4.20429	NA	3.95291	NA	High	High	High_High
BRD:BRD-K30577245-341-01-9	ACH-000972	-0.924991	DOCETAXEL	2.5	HEC151_ENDOMETRIUM	Female	ENDOMETRIUM	NA	NA	NA	0	WT	2.90295	5.47219	4.27057	3.66101	NA	NA	NA	Low	NA	Low_NA
BRD:BRD-K30577245-341-01-9	ACH-000973	-5.54973	DOCETAXEL	2.5	639V_URINARY_TRACT	Male	URINARY_TRACT	Bladder	Bladder Carcinoma	NA	2	Mutant	3.27498	6.33451	4.62394	4.46184	5.46551	4.24093	1.00833	Low	High	Low_High
BRD:BRD-K30577245-341-01-9	ACH-000974	-4.01931	DOCETAXEL	2.5	SNGM_ENDOMETRIUM	Female	ENDOMETRIUM	Endometrium	Endometrial Carcinoma	Endometrial adenocarcinoma	0	WT	3.00854	6.2027	4.30927	3.98698	NA	5.08051	NA	Low	High	Low_High
BRD:BRD-K30577245-341-01-9	ACH-000976	-0.578418	DOCETAXEL	2.5	HUCCT1_BILIARY_TRACT	Male	BILIARY_TRACT	Biliary Tract	Biliary Tract Carcinoma	Intrahepatic Cholangiocarcinoma	2	Mutant	2.50533	4.82343	2.611	1.7318	NA	3.46989	NA	Low	Low	Low_Low
BRD:BRD-K30577245-341-01-9	ACH-000977	-1.49608	DOCETAXEL	2.5	LNCAPCLONEFGC_PROSTATE	Male	PROSTATE	Prostate	Prostate Carcinoma	NA	0	WT	3.1859	6.15189	4.45425	3.89346	NA	3.11928	NA	Low	Low	Low_Low
BRD:BRD-K30577245-341-01-9	ACH-000978	-1.42298	DOCETAXEL	2.5	EN_ENDOMETRIUM	Female	ENDOMETRIUM	Endometrium	Endometrial Carcinoma	NA	1	Mutant	4.27334	5.55909	5.49398	4.53497	3.11506	5.17999	NA	High	High	High_High
BRD:BRD-K30577245-341-01-9	ACH-000979	-4.3544	DOCETAXEL	2.5	DU145_PROSTATE	Male	PROSTATE	Prostate	Prostate Carcinoma	NA	1	Mutant	NA	NA	NA	NA	3.07965	4.13417	NA	NA	High	NA_High
BRD:BRD-K30577245-341-01-9	ACH-000982	-3.42932	DOCETAXEL	2.5	GP2D_LARGE_INTESTINE	Unknown	LARGE_INTESTINE	NA	NA	NA	0	WT	4.5829	6.22519	4.68837	4.96028	NA	NA	NA	High	NA	High_NA
BRD:BRD-K30577245-341-01-9	ACH-000984	-3.30806	DOCETAXEL	2.5	HEC6_ENDOMETRIUM	Female	ENDOMETRIUM	NA	NA	NA	1	Mutant	3.96924	5.52614	5.37853	4.53625	NA	NA	NA	High	NA	High_NA
BRD:BRD-K30577245-341-01-9	ACH-000985	-1.83151	DOCETAXEL	2.5	LS411N_LARGE_INTESTINE	Male	LARGE_INTESTINE	Large Intestine	Colorectal Carcinoma	Cecum adenocarcinoma	0	WT	3.83994	3.43832	3.81339	4.37523	NA	3.41208	NA	High	Low	High_Low
BRD:BRD-K30577245-341-01-9	ACH-000986	-3.64016	DOCETAXEL	2.5	HT115_LARGE_INTESTINE	Unknown	LARGE_INTESTINE	Large Intestine	Colorectal Carcinoma	NA	1	Mutant	3.14314	2.38497	3.08161	3.19601	NA	3.73572	NA	Low	Low	Low_Low
BRD:BRD-K30577245-341-01-9	ACH-000987	-3.84571	DOCETAXEL	2.5	MEWO_SKIN	Male	SKIN	Skin	Melanoma	Cutaneous melanoma	2	Mutant	3.28205	4.43035	5.09396	3.44777	NA	4.2942	NA	Low	High	Low_High
BRD:BRD-K30577245-341-01-9	ACH-000988	-1.76463	DOCETAXEL	2.5	MFE319_ENDOMETRIUM	Female	ENDOMETRIUM	Endometrium	Endometrial Carcinoma	Endometrial adenosquamous carcinoma	2	Mutant	4.17289	6.35055	4.66875	3.55565	NA	5.18998	NA	High	High	High_High
BRD:BRD-K30577245-341-01-9	ACH-000990	-2.73831	DOCETAXEL	2.5	HEC108_ENDOMETRIUM	Female	ENDOMETRIUM	NA	NA	NA	1	Mutant	3.54482	5.9595	5.02412	4.64633	NA	NA	NA	Low	NA	Low_NA
BRD:BRD-K30577245-341-01-9	ACH-000991	-2.82985	DOCETAXEL	2.5	SNU81_LARGE_INTESTINE	Male	LARGE_INTESTINE	Large Intestine	Colorectal Carcinoma	Colon adenocarcinoma	2	Mutant	3.61732	5.98239	4.93834	4.22155	3.43332	3.62767	NA	Low	Low	Low_Low
BRD:BRD-K30577245-341-01-9	ACH-000994	-0.72004	DOCETAXEL	2.5	HEC59_ENDOMETRIUM	Female	ENDOMETRIUM	NA	NA	NA	1	Mutant	5.40162	5.69068	4.31387	5.10691	NA	NA	NA	High	NA	High_NA
BRD:BRD-K30577245-341-01-9	ACH-000996	-3.67153	DOCETAXEL	2.5	HEC251_ENDOMETRIUM	Female	ENDOMETRIUM	NA	NA	NA	1	Mutant	3.26217	4.74708	4.14965	3.93249	NA	NA	NA	Low	NA	Low_NA
BRD:BRD-K30577245-341-01-9	ACH-000997	-2.9358	DOCETAXEL	2.5	HCT15_LARGE_INTESTINE	Male	LARGE_INTESTINE	Large Intestine	Colorectal Carcinoma	Colon adenocarcinoma	1	Mutant	4.35721	5.61814	4.20568	4.67165	1.80863	3.58647	1.94504	High	Low	High_Low
BRD:BRD-K30577245-341-01-9	ACH-000998	-2.73576	DOCETAXEL	2.5	CW2_LARGE_INTESTINE	Female	LARGE_INTESTINE	Large Intestine	Colorectal Carcinoma	Colon adenocarcinoma	0	WT	3.90601	6.77418	3.41059	2.11148	NA	2.83418	NA	High	Low	High_Low
BRD:BRD-K30577245-341-01-9	ACH-001007	-5.33601	DOCETAXEL	2.5	NA	Unknown	NA	NA	NA	NA	NA	NA	NA	NA	NA	NA	NA	NA	NA	NA	NA	NA_NA
BRD:BRD-K30577245-341-01-9	ACH-001008	-5.29738	DOCETAXEL	2.5	NA	Unknown	NA	NA	NA	NA	NA	NA	NA	NA	NA	NA	NA	NA	NA	NA	NA	NA_NA
BRD:BRD-K30577245-341-01-9	ACH-001009	-3.73908	DOCETAXEL	2.5	NA	Unknown	NA	NA	NA	NA	NA	NA	NA	NA	NA	NA	NA	NA	NA	NA	NA	NA_NA
BRD:BRD-K30577245-341-01-9	ACH-001010	-2.81376	DOCETAXEL	2.5	NA	Unknown	NA	NA	NA	NA	NA	NA	NA	NA	NA	NA	NA	NA	NA	NA	NA	NA_NA
BRD:BRD-K30577245-341-01-9	ACH-001016	-3.31138	DOCETAXEL	2.5	BECKER_CENTRAL_NERVOUS_SYSTEM	Male	CENTRAL_NERVOUS_SYSTEM	Central Nervous System	Glioma	Low Grade Glioma	0	WT	4.00831	6.56305	5.39796	4.08765	3.26765	4.1196	NA	High	Low	High_Low
BRD:BRD-K30577245-341-01-9	ACH-001022	-3.31609	DOCETAXEL	2.5	CBAGPN_BONE	Unknown	BONE	NA	NA	NA	0	WT	4.19316	6.96049	5.46173	5.00134	NA	NA	NA	High	NA	High_NA
BRD:BRD-K30577245-341-01-9	ACH-001024	-3.73284	DOCETAXEL	2.5	CHL1_SKIN	Female	SKIN	Skin	Melanoma	NA	2	Mutant	NA	NA	NA	NA	NA	3.21463	NA	NA	Low	NA_Low
BRD:BRD-K30577245-341-01-9	ACH-001029	-1.89485	DOCETAXEL	2.5	CHLA10_BONE	Unknown	BONE	NA	NA	NA	0	WT	4.18038	6.76422	5.63586	5.23228	NA	NA	NA	High	NA	High_NA
BRD:BRD-K30577245-341-01-9	ACH-001075	-2.92371	DOCETAXEL	2.5	NCIH292_LUNG	Female	LUNG	Lung	Other Solid Carcinomas	Lung mucoepidermoid carcinoma	0	WT	3.0619	5.24657	4.02697	4.34454	NA	3.69648	NA	Low	Low	Low_Low
BRD:BRD-K30577245-341-01-9	ACH-001099	-2.18178	DOCETAXEL	2.5	KD_SOFT_TISSUE	Unknown	SOFT_TISSUE	NA	NA	NA	0	WT	3.06517	5.85512	4.83907	3.66771	NA	NA	NA	Low	NA	Low_NA
BRD:BRD-K30577245-341-01-9	ACH-001113	-0.106812	DOCETAXEL	2.5	LC1SQSF_LUNG	Unknown	LUNG	NA	NA	NA	2	Mutant	4.13689	4.97821	5.18961	4.11247	NA	NA	NA	High	NA	High_NA
BRD:BRD-K30577245-341-01-9	ACH-001128	-2.52266	DOCETAXEL	2.5	MON_SOFT_TISSUE	Unknown	SOFT_TISSUE	NA	NA	NA	0	WT	5.23251	5.93721	6.0149	4.32495	NA	NA	NA	High	NA	High_NA
BRD:BRD-K30577245-341-01-9	ACH-001145	-2.84552	DOCETAXEL	2.5	OC316_OVARY	Female	OVARY	NA	NA	NA	2	Mutant	3.88581	5.85877	4.70278	5.28737	NA	NA	NA	High	NA	High_NA
BRD:BRD-K30577245-341-01-9	ACH-001163	-4.87457	DOCETAXEL	2.5	PEDS005TADH_KIDNEY	Unknown	KIDNEY	NA	NA	NA	1	Mutant	4.29616	6.2311	4.59992	4.01203	NA	NA	NA	High	NA	High_NA
BRD:BRD-K30577245-341-01-9	ACH-001163	-4.87457	DOCETAXEL	2.5	PEDS005TSUSP_KIDNEY	Unknown	KIDNEY	NA	NA	NA	1	Mutant	4.29616	6.2311	4.59992	4.01203	NA	NA	NA	High	NA	High_NA
BRD:BRD-K30577245-341-01-9	ACH-001190	-2.89634	DOCETAXEL	2.5	SKMEL2_SKIN	Male	SKIN	Skin	Melanoma	NA	2	Mutant	3.87412	4.38406	4.78652	3.66114	NA	3.5824	NA	High	Low	High_Low
BRD:BRD-K30577245-341-01-9	ACH-001192	-3.29351	DOCETAXEL	2.5	SKNEP1_BONE	Unknown	BONE	NA	NA	NA	2	Mutant	4.37206	6.91095	5.77103	4.71579	NA	NA	NA	High	NA	High_NA
BRD:BRD-K30577245-341-01-9	ACH-001193	-2.71088	DOCETAXEL	2.5	SKPNDW_BONE	Male	BONE	Other tissue	Other Solid Carcinomas	Primitive Neuroectodermal Tumor	2	Mutant	4.14961	5.92315	5.10452	3.37549	2.01345	3.66588	NA	High	Low	High_Low
BRD:BRD-K30577245-341-01-9	ACH-001200	-0.766084	DOCETAXEL	2.5	STM9101_SOFT_TISSUE	Unknown	SOFT_TISSUE	NA	NA	NA	0	WT	5.07059	5.36838	4.03962	4.37876	NA	NA	NA	High	NA	High_NA
BRD:BRD-K30577245-341-01-9	ACH-001205	-3.84216	DOCETAXEL	2.5	TC32_BONE	Unknown	BONE	NA	NA	NA	0	WT	NA	NA	NA	NA	NA	NA	NA	NA	NA	NA_NA
BRD:BRD-K30577245-341-01-9	ACH-001210	-1.58776	DOCETAXEL	2.5	TTC1240_SOFT_TISSUE	Unknown	SOFT_TISSUE	NA	NA	NA	0	WT	4.06923	6.32615	5.85704	3.91357	NA	NA	NA	High	NA	High_NA
BRD:BRD-K30577245-341-01-9	ACH-001211	-2.18991	DOCETAXEL	2.5	TTC549_SOFT_TISSUE	Unknown	SOFT_TISSUE	NA	NA	NA	0	WT	3.57055	5.1335	5.68875	4.50535	NA	NA	NA	High	NA	High_NA
BRD:BRD-K30577245-341-01-9	ACH-001212	-1.75418	DOCETAXEL	2.5	TTC642_SOFT_TISSUE	Unknown	SOFT_TISSUE	NA	NA	NA	NA	NA	NA	NA	NA	NA	NA	NA	NA	NA	NA	NA_NA
BRD:BRD-K30577245-341-01-9	ACH-001239	-1.62415	DOCETAXEL	2.5	WM2664_SKIN	Unknown	SKIN	NA	NA	NA	0	WT	3.9657	4.91289	4.60347	4.04924	NA	NA	NA	High	NA	High_NA
BRD:BRD-K30577245-341-01-9	ACH-001306	-4.60441	DOCETAXEL	2.5	8305C_THYROID	Female	THYROID	Thyroid	Thyroid Gland Carcinoma	Thyroid gland anaplastic carcinoma	2	Mutant	3.21127	6.01872	4.78038	4.26465	3.3372	4.22579	NA	High	High	High_High
BRD:BRD-K30577245-341-01-9	ACH-001307	-1.36249	DOCETAXEL	2.5	8505C_THYROID	Female	THYROID	Thyroid	Thyroid Gland Carcinoma	Thyroid gland anaplastic carcinoma	2	Mutant	2.69774	6.10643	4.45844	4.62902	4.32985	3.33133	NA	Low	Low	Low_Low
BRD:BRD-K30577245-341-01-9	ACH-001318	-3.74819	DOCETAXEL	2.5	PLCPRF5_LIVER	Unknown	LIVER	NA	NA	NA	2	Mutant	5.45189	4.07425	4.985	4.74857	NA	NA	NA	High	NA	High_NA
BRD:BRD-K30577245-341-01-9	ACH-001321	-2.14342	DOCETAXEL	2.5	TT_THYROID	Female	THYROID	Thyroid	Thyroid Gland Carcinoma	Hereditary thyroid gland medullary carcinoma	0	WT	3.69497	4.21273	5.82276	3.60284	NA	5.1437	NA	High	High	High_High
BRD:BRD-K62008436-001-22-1	ACH-000001	-0.137174	PACLITAXEL	2.5	NIHOVCAR3_OVARY	Female	OVARY	Ovary	Ovarian Carcinoma	High grade ovarian serous adenocarcinoma	2	Mutant	3.03713	5.65674	5.02699	3.56877	2.03756	4.37572	NA	Low	High	Low_High
BRD:BRD-K62008436-001-22-1	ACH-000007	-4.36866	PACLITAXEL	2.5	LS513_LARGE_INTESTINE	Male	LARGE_INTESTINE	Large Intestine	Colorectal Carcinoma	Cecum adenocarcinoma	0	WT	3.23476	5.95091	4.24605	3.68324	NA	4.20772	NA	Low	High	Low_High
BRD:BRD-K62008436-001-22-1	ACH-000008	-0.901625	PACLITAXEL	2.5	A101D_SKIN	Unknown	SKIN	NA	NA	NA	0	WT	3.54246	4.44084	4.16639	3.64412	NA	NA	NA	High	NA	High_NA
BRD:BRD-K62008436-001-22-1	ACH-000011	-2.47028	PACLITAXEL	2.5	253J_URINARY_TRACT	Unknown	URINARY_TRACT	NA	NA	NA	0	WT	3.12599	5.41077	4.38694	3.32351	NA	NA	NA	Low	NA	Low_NA
BRD:BRD-K62008436-001-22-1	ACH-000012	-1.00477	PACLITAXEL	2.5	HCC827_LUNG	Female	LUNG	Lung	Non-Small Cell Lung Carcinoma	Lung Adenocarcinoma	0	WT	2.97765	5.68926	4.36106	3.88185	NA	3.43392	NA	Low	Low	Low_Low
BRD:BRD-K62008436-001-22-1	ACH-000013	-1.3184	PACLITAXEL	2.5	ONCODG1_OVARY	Female	OVARY	NA	NA	NA	2	Mutant	3.01531	6.09777	4.29803	3.72998	NA	NA	NA	Low	NA	Low_NA
BRD:BRD-K62008436-001-22-1	ACH-000014	-3.55915	PACLITAXEL	2.5	HS294T_SKIN	Unknown	SKIN	NA	NA	NA	0	WT	3.75448	5.86806	3.86283	3.42448	NA	NA	NA	High	NA	High_NA
BRD:BRD-K62008436-001-22-1	ACH-000015	-3.87678	PACLITAXEL	2.5	NCIH1581_LUNG	Male	LUNG	Lung	Non-Small Cell Lung Carcinoma	Lung large cell carcinoma	2	Mutant	3.33332	2.40535	3.86548	4.54578	NA	3.9951	NA	Low	High	Low_High
BRD:BRD-K62008436-001-22-1	ACH-000018	-2.90511	PACLITAXEL	2.5	T24_URINARY_TRACT	Female	URINARY_TRACT	Bladder	Bladder Carcinoma	NA	0	WT	3.18138	3.36263	5.36645	4.66287	NA	4.46353	NA	Low	High	Low_High
BRD:BRD-K62008436-001-22-1	ACH-000019	-3.15814	PACLITAXEL	2.5	MCF7_BREAST	Female	BREAST	Breast	Breast Carcinoma	Invasive Ductal Carcinoma of No Special Type	0	WT	3.50173	6.3123	3.90643	2.99134	NA	4.06704	NA	High	High	High_High
BRD:BRD-K62008436-001-22-1	ACH-000021	-3.89063	PACLITAXEL	2.5	NCIH1693_LUNG	Female	LUNG	Lung	Non-Small Cell Lung Carcinoma	Lung Adenocarcinoma	0	WT	3.6374	4.05833	3.88304	4.59441	NA	3.57091	NA	High	Low	High_Low
BRD:BRD-K62008436-001-22-1	ACH-000022	-0.496438	PACLITAXEL	2.5	PATU8988S_PANCREAS	Unknown	PANCREAS	NA	NA	NA	2	Mutant	3.87429	5.51019	3.45292	4.55336	NA	NA	NA	High	NA	High_NA
BRD:BRD-K62008436-001-22-1	ACH-000023	-2.6	PACLITAXEL	2.5	PATU8988T_PANCREAS	Female	PANCREAS	Pancreas	Pancreatic Carcinoma	Pancreatic adenocarcinoma	2	Mutant	3.85052	6.59519	3.88391	5.18607	3.29311	3.16898	NA	High	Low	High_Low
BRD:BRD-K62008436-001-22-1	ACH-000026	-1.1167	PACLITAXEL	2.5	253JBV_URINARY_TRACT	Unknown	URINARY_TRACT	NA	NA	NA	0	WT	3.40249	5.64359	4.20639	3.9521	NA	NA	NA	High	NA	High_NA
BRD:BRD-K62008436-001-22-1	ACH-000027	-2.98518	PACLITAXEL	2.5	GOS3_CENTRAL_NERVOUS_SYSTEM	Unknown	CENTRAL_NERVOUS_SYSTEM	NA	NA	NA	0	WT	3.87993	6.02784	5.75305	4.37665	NA	NA	NA	High	NA	High_NA
BRD:BRD-K62008436-001-22-1	ACH-000030	-2.88487	PACLITAXEL	2.5	PC14_LUNG	Male	LUNG	Lung	Non-Small Cell Lung Carcinoma	Lung Adenocarcinoma	2	Mutant	3.13069	6.74456	4.44525	4.04837	5.14414	4.33118	NA	Low	High	Low_High
BRD:BRD-K62008436-001-22-1	ACH-000035	-3.19403	PACLITAXEL	2.5	NCIH1650_LUNG	Male	LUNG	Lung	Non-Small Cell Lung Carcinoma	Lung Adenocarcinoma	0	WT	3.44476	3.61351	5.08649	4.46184	NA	3.75313	NA	Low	Low	Low_Low
BRD:BRD-K62008436-001-22-1	ACH-000037	-0.888962	PACLITAXEL	2.5	S117_THYROID	Unknown	THYROID	NA	NA	NA	2	Mutant	2.69983	2.19376	4.37563	3.13441	NA	NA	NA	Low	NA	Low_NA
BRD:BRD-K62008436-001-22-1	ACH-000040	-0.321547	PACLITAXEL	2.5	U118MG_CENTRAL_NERVOUS_SYSTEM	Male	CENTRAL_NERVOUS_SYSTEM	Central Nervous System	Glioma	Low Grade Glioma	2	Mutant	3.57633	4.97367	5.85276	4.59319	3.02349	4.65349	NA	High	High	High_High
BRD:BRD-K62008436-001-22-1	ACH-000041	-1.06692	PACLITAXEL	2.5	RDES_BONE	Unknown	BONE	NA	NA	NA	2	Mutant	4.03665	6.64664	5.4161	4.49295	NA	NA	NA	High	NA	High_NA
BRD:BRD-K62008436-001-22-1	ACH-000042	-2.44355	PACLITAXEL	2.5	PANC0203_PANCREAS	Female	PANCREAS	Pancreas	Pancreatic Carcinoma	Pancreatic adenocarcinoma	2	Mutant	2.7452	4.4467	4.45126	3.45289	3.81536	4.04583	NA	Low	High	Low_High
BRD:BRD-K62008436-001-22-1	ACH-000046	-3.62386	PACLITAXEL	2.5	ACHN_KIDNEY	Male	KIDNEY	Kidney	Kidney Carcinoma	Papillary renal cell carcinoma	0	WT	3.16315	5.41794	4.85936	4.19638	NA	4.6473	NA	Low	High	Low_High
BRD:BRD-K62008436-001-22-1	ACH-000047	-3.53195	PACLITAXEL	2.5	GCIY_STOMACH	Female	STOMACH	Stomach	Gastric Carcinoma	Gastric adenocarcinoma	2	Mutant	NA	NA	NA	NA	NA	4.82782	NA	NA	High	NA_High
BRD:BRD-K62008436-001-22-1	ACH-000048	-2.44678	PACLITAXEL	2.5	TOV112D_OVARY	Female	OVARY	Ovary	Ovarian Carcinoma	Ovarian endometrioid adenocarcinoma	2	Mutant	3.90785	6.7739	5.0774	4.27599	3.64731	4.03285	NA	High	Low	High_Low
BRD:BRD-K62008436-001-22-1	ACH-000052	-2.26035	PACLITAXEL	2.5	A673_BONE	Female	BONE	Bone	Ewing's Sarcoma	NA	0	WT	3.98157	3.41135	4.99926	4.40187	NA	4.23095	NA	Low	High	Low_High
BRD:BRD-K62008436-001-22-1	ACH-000054	-3.40595	PACLITAXEL	2.5	HT1080_SOFT_TISSUE	Male	SOFT_TISSUE	Soft Tissue	Other Sarcomas	Fibrosarcoma	0	WT	3.24636	5.21802	3.93958	3.83853	NA	3.89103	NA	Low	Low	Low_Low
BRD:BRD-K62008436-001-22-1	ACH-000060	-3.70669	PACLITAXEL	2.5	PANC1005_PANCREAS	Male	PANCREAS	Pancreas	Pancreatic Carcinoma	Pancreatic ductal adenocarcinoma	2	Mutant	3.70453	4.67449	4.36106	3.48707	NA	3.24938	NA	High	Low	High_Low
BRD:BRD-K62008436-001-22-1	ACH-000062	-2.58198	PACLITAXEL	2.5	RERFLCMS_LUNG	Male	LUNG	Lung	Non-Small Cell Lung Carcinoma	Lung Adenocarcinoma	0	WT	3.28205	2.43045	4.78038	4.10322	NA	4.3109	NA	Low	High	Low_High
BRD:BRD-K62008436-001-22-1	ACH-000066	-2.09519	PACLITAXEL	2.5	HCC4006_LUNG	Unknown	LUNG	NA	NA	NA	2	Mutant	3.7077	6.44023	4.43679	4.17883	NA	NA	NA	High	NA	High_NA
BRD:BRD-K62008436-001-22-1	ACH-000075	-2.85007	PACLITAXEL	2.5	U87MG_CENTRAL_NERVOUS_SYSTEM	Unknown	CENTRAL_NERVOUS_SYSTEM	NA	NA	NA	0	WT	3.10387	3.9106	4.94268	1.5381	NA	NA	NA	Low	NA	Low_NA
BRD:BRD-K62008436-001-22-1	ACH-000078	-0.130396	PACLITAXEL	2.5	MHHNB11_AUTONOMIC_GANGLIA	Male	AUTONOMIC_GANGLIA	Peripheral Nervous System	Neuroblastoma	NA	0	WT	4.30676	5.02547	5.66364	3.8265	NA	4.95444	NA	High	High	High_High
BRD:BRD-K62008436-001-22-1	ACH-000082	-0.474075	PACLITAXEL	2.5	G292CLONEA141B1_BONE	Female	BONE	Bone	Osteosarcoma	NA	0	WT	2.84148	2.51512	5.27354	4.64098	NA	4.58237	NA	Low	High	Low_High
BRD:BRD-K62008436-001-22-1	ACH-000085	-0.674127	PACLITAXEL	2.5	NA	Unknown	NA	NA	NA	NA	2	Mutant	2.54541	5.23467	4.62394	4.38369	NA	NA	NA	Low	NA	Low_NA
BRD:BRD-K62008436-001-22-1	ACH-000086	0.183818	PACLITAXEL	2.5	ACCMESO1_PLEURA	Unknown	PLEURA	NA	NA	NA	0	WT	2.73909	1.77681	3.3926	3.37952	NA	NA	NA	Low	NA	Low_NA
BRD:BRD-K62008436-001-22-1	ACH-000087	-3.05684	PACLITAXEL	2.5	SKES1_BONE	Male	BONE	Bone	Ewing's Sarcoma	NA	2	Mutant	4.07993	6.92512	5.49217	4.08884	4.46983	4.81089	0.00377	High	High	High_High
BRD:BRD-K62008436-001-22-1	ACH-000090	-2.19053	PACLITAXEL	2.5	PC3_PROSTATE	Male	PROSTATE	Prostate	Prostate Carcinoma	NA	0	WT	2.76937	1.57116	4.10584	3.43746	NA	4.10717	NA	Low	High	Low_High
BRD:BRD-K62008436-001-22-1	ACH-000091	-3.32653	PACLITAXEL	2.5	OV56_OVARY	Female	OVARY	Ovary	Ovarian Carcinoma	Ovarian serous adenocarcinoma	0	WT	3.33196	2.57506	4.9366	3.90116	NA	4.00673	NA	High	Low	High_Low
BRD:BRD-K62008436-001-22-1	ACH-000092	-3.12129	PACLITAXEL	2.5	NCIH2452_PLEURA	Male	PLEURA	Lung	Mesothelioma	Pleural Biphasic Mesothelioma	0	WT	3.09909	5.10101	5.39148	3.88088	NA	4.67738	NA	Low	High	Low_High
BRD:BRD-K62008436-001-22-1	ACH-000096	-3.02914	PACLITAXEL	2.5	G401_SOFT_TISSUE	Male	SOFT_TISSUE	Other tissue	Other Solid Carcinomas	Rhabdoid Tumour of the Kidney	0	WT	4.37208	5.79132	5.06865	4.84659	NA	4.48878	NA	High	High	High_High
BRD:BRD-K62008436-001-22-1	ACH-000097	-1.90788	PACLITAXEL	2.5	ZR751_BREAST	Female	BREAST	NA	NA	NA	0	WT	3.9964	4.1056	4.18509	3.77431	NA	NA	NA	High	NA	High_NA
BRD:BRD-K62008436-001-22-1	ACH-000098	-3.76623	PACLITAXEL	2.5	GAMG_CENTRAL_NERVOUS_SYSTEM	Female	CENTRAL_NERVOUS_SYSTEM	Central Nervous System	Glioblastoma	NA	2	Mutant	3.09269	5.03518	5.42873	4.41708	NA	3.56964	0.69865	Low	Low	Low_Low
BRD:BRD-K62008436-001-22-1	ACH-000099	-0.105244	PACLITAXEL	2.5	SIMA_AUTONOMIC_GANGLIA	Male	AUTONOMIC_GANGLIA	Peripheral Nervous System	Neuroblastoma	NA	0	WT	3.72659	4.98872	4.65414	3.23625	NA	4.63977	NA	Low	Low	Low_Low
BRD:BRD-K62008436-001-22-1	ACH-000102	-0.711684	PACLITAXEL	2.5	NA	Unknown	NA	NA	NA	NA	2	Mutant	3.56008	6.4366	5.57491	3.94559	NA	NA	NA	High	NA	High_NA
BRD:BRD-K62008436-001-22-1	ACH-000107	-1.28944	PACLITAXEL	2.5	CAPAN2_PANCREAS	Male	PANCREAS	Pancreas	Pancreatic Carcinoma	Pancreatic ductal adenocarcinoma	2	Mutant	3.418	5.08578	4.15549	4.24479	NA	3.6229	NA	High	Low	High_Low
BRD:BRD-K62008436-001-22-1	ACH-000108	-2.85136	PACLITAXEL	2.5	KP3_PANCREAS	Male	PANCREAS	Pancreas	Pancreatic Carcinoma	Pancreatic adenosquamous carcinoma	0	WT	4.29547	3.53802	4.25495	4.23785	NA	4.37908	NA	High	High	High_High
BRD:BRD-K62008436-001-22-1	ACH-000114	-0.134567	PACLITAXEL	2.5	NA	Female	NA	Pancreas	Pancreatic Carcinoma	Pancreatic adenocarcinoma	2	Mutant	3.26788	5.34958	4.36805	4.15376	NA	3.50141	NA	Low	Low	Low_Low
BRD:BRD-K62008436-001-22-1	ACH-000116	-3.22932	PACLITAXEL	2.5	NA	Female	NA	Ovary	Ovarian Carcinoma	High grade ovarian serous adenocarcinoma	0	WT	4.18821	1.82969	4.2753	4.79889	NA	3.8228	NA	High	Low	High_Low
BRD:BRD-K62008436-001-22-1	ACH-000117	-0.74884	PACLITAXEL	2.5	EFM192A_BREAST	Female	BREAST	Breast	Breast Carcinoma	NA	0	WT	3.51743	2.76385	4.17072	2.86583	NA	3.97948	NA	High	High	High_High
BRD:BRD-K62008436-001-22-1	ACH-000118	-2.30737	PACLITAXEL	2.5	HUPT3_PANCREAS	Male	PANCREAS	Pancreas	Pancreatic Carcinoma	Pancreatic adenocarcinoma	2	Mutant	2.79118	4.17656	4.46499	2.53861	NA	3.32092	NA	Low	Low	Low_Low
BRD:BRD-K62008436-001-22-1	ACH-000123	-1.64774	PACLITAXEL	2.5	COV434_OVARY	Female	OVARY	NA	NA	NA	0	WT	3.61508	4.75611	4.12232	4.15783	NA	NA	NA	High	NA	High_NA
BRD:BRD-K62008436-001-22-1	ACH-000132	-1.1598	PACLITAXEL	2.5	JHOS2_OVARY	Female	OVARY	Ovary	Ovarian Carcinoma	High grade ovarian serous adenocarcinoma	0	WT	3.67567	6.30249	2.82904	4.08288	NA	2.9704	NA	High	Low	High_Low
BRD:BRD-K62008436-001-22-1	ACH-000133	-3.08263	PACLITAXEL	2.5	HS729_SOFT_TISSUE	Unknown	SOFT_TISSUE	NA	NA	NA	2	Mutant	2.79118	6.39499	4.83302	3.96228	NA	NA	NA	Low	NA	Low_NA
BRD:BRD-K62008436-001-22-1	ACH-000137	-2.65313	PACLITAXEL	2.5	8MGBA_CENTRAL_NERVOUS_SYSTEM	Female	CENTRAL_NERVOUS_SYSTEM	Central Nervous System	Glioblastoma	NA	2	Mutant	4.075	6.37167	4.94528	3.31793	3.2683	3.90342	NA	High	Low	High_Low
BRD:BRD-K62008436-001-22-1	ACH-000138	-2.61005	PACLITAXEL	2.5	CFPAC1_PANCREAS	Male	PANCREAS	Pancreas	Pancreatic Carcinoma	Pancreatic ductal adenocarcinoma	2	Mutant	3.11497	3.99377	4.54655	2.92446	NA	5.08581	NA	Low	High	Low_High
BRD:BRD-K62008436-001-22-1	ACH-000141	-1.10877	PACLITAXEL	2.5	SNU308_BILIARY_TRACT	Unknown	BILIARY_TRACT	NA	NA	NA	0	WT	3.57864	5.16772	5.00219	3.93249	NA	NA	NA	High	NA	High_NA
BRD:BRD-K62008436-001-22-1	ACH-000142	-3.90301	PACLITAXEL	2.5	CAL29_URINARY_TRACT	Female	URINARY_TRACT	Bladder	Bladder Carcinoma	NA	2	Mutant	3.36565	4.96816	4.95906	3.48832	NA	4.33013	NA	High	High	High_High
BRD:BRD-K62008436-001-22-1	ACH-000147	-1.56149	PACLITAXEL	2.5	T47D_BREAST	Female	BREAST	Breast	Breast Carcinoma	Invasive Ductal Carcinoma of No Special Type	2	Mutant	3.13537	5.52392	4.87938	4.52023	3.62894	3.82558	NA	Low	Low	Low_Low
BRD:BRD-K62008436-001-22-1	ACH-000153	-2.18942	PACLITAXEL	2.5	NCIH2052_PLEURA	Male	PLEURA	Lung	Mesothelioma	Pleural Sarcomatoid Mesothelioma	0	WT	3.73076	5.03869	3.76793	4.81015	NA	2.75167	NA	High	Low	High_Low
BRD:BRD-K62008436-001-22-1	ACH-000155	-1.03472	PACLITAXEL	2.5	SW1990_PANCREAS	Male	PANCREAS	Pancreas	Pancreatic Carcinoma	Pancreatic adenocarcinoma	0	WT	2.48366	5.33596	2.88574	3.7691	3.58753	3.05674	NA	Low	Low	Low_Low
BRD:BRD-K62008436-001-22-1	ACH-000159	0.654104	PACLITAXEL	2.5	OSRC2_KIDNEY	Male	KIDNEY	Kidney	Kidney Carcinoma	NA	0	WT	2.90295	4.92524	4.82132	4.13984	NA	3.94947	NA	Low	Low	Low_Low
BRD:BRD-K62008436-001-22-1	ACH-000161	-0.440748	PACLITAXEL	2.5	CORL105_LUNG	Male	LUNG	Lung	Non-Small Cell Lung Carcinoma	Lung Adenocarcinoma	0	WT	3.58439	4.41448	4.44826	2.33705	NA	3.7525	NA	High	Low	High_Low
BRD:BRD-K62008436-001-22-1	ACH-000163	-2.61841	PACLITAXEL	2.5	SW579_THYROID	Unknown	THYROID	NA	NA	NA	2	Mutant	3.12599	6.06776	5.19671	4.0769	NA	NA	NA	High	NA	High_NA
BRD:BRD-K62008436-001-22-1	ACH-000164	-0.826209	PACLITAXEL	2.5	PANC1_PANCREAS	Unknown	PANCREAS	NA	NA	NA	2	Mutant	3.07494	5.00676	5.3589	4.68271	NA	NA	NA	Low	NA	Low_NA
BRD:BRD-K62008436-001-22-1	ACH-000169	-2.00137	PACLITAXEL	2.5	RD_SOFT_TISSUE	Female	SOFT_TISSUE	Soft Tissue	Rhabdomyosarcoma	Embryonal rhabdomyosarcoma	2	Mutant	3.63074	5.65149	5.57377	5.07209	4.22686	4.58741	NA	High	High	High_High
BRD:BRD-K62008436-001-22-1	ACH-000171	-3.0387	PACLITAXEL	2.5	VMRCRCZ_KIDNEY	Unknown	KIDNEY	Kidney	Kidney Carcinoma	NA	0	WT	4.77189	2.73162	5.0051	4.44774	NA	3.90681	NA	High	Low	High_Low
BRD:BRD-K62008436-001-22-1	ACH-000172	-2.37506	PACLITAXEL	2.5	TM87_SOFT_TISSUE	Unknown	SOFT_TISSUE	NA	NA	NA	0	WT	3.83607	5.59831	6.34359	4.57402	NA	NA	NA	High	NA	High_NA
BRD:BRD-K62008436-001-22-1	ACH-000174	-2.85166	PACLITAXEL	2.5	CAL62_THYROID	Female	THYROID	Thyroid	Thyroid Gland Carcinoma	Thyroid gland anaplastic carcinoma	2	Mutant	3.54718	5.832	4.69604	4.3088	NA	4.10617	NA	High	Low	High_Low
BRD:BRD-K62008436-001-22-1	ACH-000176	-1.49893	PACLITAXEL	2.5	LOUNH91_LUNG	Female	LUNG	Lung	Non-Small Cell Lung Carcinoma	Squamous Cell Lung Carcinoma	2	Mutant	3.01193	5.5825	4.72984	4.59073	NA	4.07443	NA	Low	High	Low_High
BRD:BRD-K62008436-001-22-1	ACH-000178	-0.89149	PACLITAXEL	2.5	HS766T_PANCREAS	Male	PANCREAS	Pancreas	Pancreatic Carcinoma	Pancreatic adenocarcinoma	0	WT	3.48093	7.01425	4.06923	4.39839	NA	2.72638	NA	High	Low	High_Low
BRD:BRD-K62008436-001-22-1	ACH-000182	-1.9148	PACLITAXEL	2.5	SNU869_BILIARY_TRACT	Unknown	BILIARY_TRACT	NA	NA	NA	0	WT	4.36264	4.22258	4.49033	3.82952	NA	NA	NA	High	NA	High_NA
BRD:BRD-K62008436-001-22-1	ACH-000186	-1.70422	PACLITAXEL	2.5	NCIH2444_LUNG	Male	LUNG	Lung	Non-Small Cell Lung Carcinoma	NA	2	Mutant	2.55237	5.30907	3.6586	3.53757	2.96028	4.63375	NA	Low	High	Low_High
BRD:BRD-K62008436-001-22-1	ACH-000188	-4.09482	PACLITAXEL	2.5	SCC25_UPPER_AERODIGESTIVE_TRACT	Male	UPPER_AERODIGESTIVE_TRACT	Head and Neck	Head and Neck Carcinoma	Tongue Squamous Cell Carcinoma	0	WT	1.84739	1.85909	2.76284	3.35381	NA	3.59427	NA	Low	Low	Low_Low
BRD:BRD-K62008436-001-22-1	ACH-000189	-3.09252	PACLITAXEL	2.5	RCC10RGB_KIDNEY	Male	KIDNEY	Kidney	Kidney Carcinoma	NA	0	WT	2.64435	5.59619	4.93834	2.86396	NA	3.70769	NA	Low	Low	Low_Low
BRD:BRD-K62008436-001-22-1	ACH-000191	-2.59328	PACLITAXEL	2.5	BHT101_THYROID	Female	THYROID	Thyroid	Thyroid Gland Carcinoma	Thyroid gland anaplastic carcinoma	2	Mutant	3.0668	5.55131	4.01981	3.05546	2.45814	3.63103	NA	Low	Low	Low_Low
BRD:BRD-K62008436-001-22-1	ACH-000192	-1.38806	PACLITAXEL	2.5	MFE280_ENDOMETRIUM	Female	ENDOMETRIUM	Endometrium	Endometrial Carcinoma	Endometrial adenocarcinoma	0	WT	3.39206	4.40246	5.17939	4.42531	NA	4.57703	NA	Low	Low	Low_Low
BRD:BRD-K62008436-001-22-1	ACH-000200	-2.2211	PACLITAXEL	2.5	NA	Female	NA	Central Nervous System	Glioma	Low Grade Glioma	0	WT	3.14623	4.91384	4.53297	3.90594	NA	4.36371	NA	Low	High	Low_High
BRD:BRD-K62008436-001-22-1	ACH-000201	-0.89177	PACLITAXEL	2.5	A204_SOFT_TISSUE	Female	SOFT_TISSUE	Soft Tissue	Rhabdomyosarcoma	Embryonal rhabdomyosarcoma	0	WT	2.45674	5.74074	4.79383	4.08544	NA	5.28539	NA	Low	High	Low_High
BRD:BRD-K62008436-001-22-1	ACH-000205	-2.27982	PACLITAXEL	2.5	PK59_PANCREAS	Unknown	PANCREAS	NA	NA	NA	0	WT	3.11023	3.57914	3.96955	3.26829	NA	NA	NA	Low	NA	Low_NA
BRD:BRD-K62008436-001-22-1	ACH-000207	-4.5102	PACLITAXEL	2.5	DETROIT562_UPPER_AERODIGESTIVE_TRACT	Female	UPPER_AERODIGESTIVE_TRACT	Head and Neck	Head and Neck Carcinoma	Pharyngeal squamous cell carcinoma	2	Mutant	2.06899	6.1619	3.85129	2.83946	3.63874	4.00417	NA	Low	High	Low_High
BRD:BRD-K62008436-001-22-1	ACH-000209	-1.37945	PACLITAXEL	2.5	SNU1079_BILIARY_TRACT	Unknown	BILIARY_TRACT	NA	NA	NA	0	WT	2.57078	5.58555	3.84861	3.01697	NA	NA	NA	Low	NA	Low_NA
BRD:BRD-K62008436-001-22-1	ACH-000210	-1.42504	PACLITAXEL	2.5	CADOES1_BONE	Female	BONE	Bone	Ewing's Sarcoma	NA	0	WT	3.13069	5.16207	4.53864	3.74913	NA	3.44107	NA	Low	Low	Low_Low
BRD:BRD-K62008436-001-22-1	ACH-000211	-4.1364	PACLITAXEL	2.5	DAOY_CENTRAL_NERVOUS_SYSTEM	Male	CENTRAL_NERVOUS_SYSTEM	Central Nervous System	Other Solid Carcinomas	Medulloblastoma	2	Mutant	3.58439	7.60068	5.16523	4.29695	3.95349	4.05886	NA	High	Low	High_Low
BRD:BRD-K62008436-001-22-1	ACH-000212	-0.906878	PACLITAXEL	2.5	CAL120_BREAST	Female	BREAST	Breast	Breast Carcinoma	NA	0	WT	3.55891	3.83041	3.66466	4.74189	NA	3.42062	1.0141	High	Low	High_Low
BRD:BRD-K62008436-001-22-1	ACH-000213	-2.53892	PACLITAXEL	2.5	HUPT4_PANCREAS	Male	PANCREAS	Pancreas	Pancreatic Carcinoma	Pancreatic adenocarcinoma	2	Mutant	3.46358	5.11818	3.71132	3.55685	2.25856	3.05173	NA	High	Low	High_Low
BRD:BRD-K62008436-001-22-1	ACH-000217	-0.373251	PACLITAXEL	2.5	JHH6_LIVER	Female	LIVER	Liver	Hepatocellular Carcinoma	NA	0	WT	3.27214	4.75558	4.06305	4.92793	NA	4.60451	NA	Low	High	Low_High
BRD:BRD-K62008436-001-22-1	ACH-000219	-2.64917	PACLITAXEL	2.5	A375_SKIN	Female	SKIN	Skin	Melanoma	Cutaneous melanoma	0	WT	3.73491	5.30797	4.23502	4.15132	NA	3.6692	NA	High	Low	High_Low
BRD:BRD-K62008436-001-22-1	ACH-000221	-1.15591	PACLITAXEL	2.5	SNU398_LIVER	Male	LIVER	Liver	Hepatocellular Carcinoma	NA	2	Mutant	4.11718	3.46356	4.58437	4.19876	NA	4.28751	NA	High	High	High_High
BRD:BRD-K62008436-001-22-1	ACH-000222	-3.01113	PACLITAXEL	2.5	ASPC1_PANCREAS	Female	PANCREAS	Pancreas	Pancreatic Carcinoma	Pancreatic ductal adenocarcinoma	0	WT	4.06923	2.45513	3.78944	3.77119	NA	2.8808	NA	High	Low	High_Low
BRD:BRD-K62008436-001-22-1	ACH-000223	-1.31646	PACLITAXEL	2.5	HCC1937_BREAST	Female	BREAST	Breast	Breast Carcinoma	Ductal Breast Carcinoma	2	Mutant	3.35361	4.15222	4.1156	4.81069	NA	3.83084	NA	Low	Low	Low_Low
BRD:BRD-K62008436-001-22-1	ACH-000227	-0.823074	PACLITAXEL	2.5	KPNYN_AUTONOMIC_GANGLIA	Male	AUTONOMIC_GANGLIA	Peripheral Nervous System	Neuroblastoma	NA	0	WT	3.69391	5.84796	4.7634	3.68324	NA	4.3914	NA	Low	Low	Low_Low
BRD:BRD-K62008436-001-22-1	ACH-000228	-3.76873	PACLITAXEL	2.5	BICR31_UPPER_AERODIGESTIVE_TRACT	Male	UPPER_AERODIGESTIVE_TRACT	Head and Neck	Head and Neck Carcinoma	Tongue Squamous Cell Carcinoma	0	WT	2.17741	5.95449	3.77825	2.98962	NA	3.15448	NA	Low	Low	Low_Low
BRD:BRD-K62008436-001-22-1	ACH-000231	-2.77592	PACLITAXEL	2.5	KALS1_CENTRAL_NERVOUS_SYSTEM	Female	CENTRAL_NERVOUS_SYSTEM	Central Nervous System	Glioblastoma	NA	2	Mutant	2.98974	6.2168	4.80859	4.00233	3.62013	4.3294	NA	Low	High	Low_High
BRD:BRD-K62008436-001-22-1	ACH-000232	-2.82827	PACLITAXEL	2.5	U251MG_CENTRAL_NERVOUS_SYSTEM	Male	CENTRAL_NERVOUS_SYSTEM	Central Nervous System	Glioma	Low Grade Glioma	2	Mutant	3.33604	6.26841	5.36776	4.41501	3.29077	5.0567	NA	Low	High	Low_High
BRD:BRD-K62008436-001-22-1	ACH-000234	-5.25117	PACLITAXEL	2.5	NA	Unknown	NA	NA	NA	NA	0	WT	3.3855	5.22501	4.71177	3.66213	NA	NA	NA	High	NA	High_NA
BRD:BRD-K62008436-001-22-1	ACH-000235	-4.06778	PACLITAXEL	2.5	PANC0403_PANCREAS	Male	PANCREAS	Pancreas	Pancreatic Carcinoma	Pancreatic ductal adenocarcinoma	2	Mutant	3.05533	4.90859	4.23294	3.57588	NA	3.72031	NA	Low	High	Low_High
BRD:BRD-K62008436-001-22-1	ACH-000237	-3.2891	PACLITAXEL	2.5	JHOM1_OVARY	Female	OVARY	NA	NA	NA	1	Mutant	3.10864	4.88008	5.36153	3.82247	NA	NA	NA	Low	NA	Low_NA
BRD:BRD-K62008436-001-22-1	ACH-000242	-1.65688	PACLITAXEL	2.5	RT4_URINARY_TRACT	Male	URINARY_TRACT	Bladder	Bladder Carcinoma	NA	0	WT	3.9657	5.3065	4.55049	4.04837	NA	3.99636	NA	High	Low	High_Low
BRD:BRD-K62008436-001-22-1	ACH-000243	-4.54813	PACLITAXEL	2.5	DANG_PANCREAS	Female	PANCREAS	Pancreas	Pancreatic Carcinoma	Pancreatic adenocarcinoma	0	WT	2.99146	3.26446	4.3412	5.16326	NA	2.91622	0.8478	Low	Low	Low_Low
BRD:BRD-K62008436-001-22-1	ACH-000244	-1.21647	PACLITAXEL	2.5	DKMG_CENTRAL_NERVOUS_SYSTEM	Female	CENTRAL_NERVOUS_SYSTEM	Central Nervous System	Glioblastoma	NA	0	WT	3.25644	5.21021	5.35296	3.47954	NA	4.82401	NA	Low	High	Low_High
BRD:BRD-K62008436-001-22-1	ACH-000249	-1.36057	PACLITAXEL	2.5	CL11_LARGE_INTESTINE	Male	LARGE_INTESTINE	Large Intestine	Colorectal Carcinoma	Colon adenocarcinoma	2	Mutant	3.2693	4.09166	4.64414	3.8042	NA	4.7061	NA	Low	High	Low_High
BRD:BRD-K62008436-001-22-1	ACH-000250	-2.24986	PACLITAXEL	2.5	KMRC20_KIDNEY	Unknown	KIDNEY	Kidney	Kidney Carcinoma	Clear cell renal cell carcinoma	0	WT	3.42057	2.39009	5.05824	4.41156	NA	4.5255	NA	Low	High	Low_High
BRD:BRD-K62008436-001-22-1	ACH-000252	-2.52949	PACLITAXEL	2.5	LS1034_LARGE_INTESTINE	Male	LARGE_INTESTINE	Large Intestine	Colorectal Carcinoma	Cecum adenocarcinoma	2	Mutant	3.30721	6.27806	4.63301	3.50821	NA	4.07431	NA	Low	High	Low_High
BRD:BRD-K62008436-001-22-1	ACH-000255	-3.86674	PACLITAXEL	2.5	LMSU_STOMACH	Unknown	STOMACH	NA	NA	NA	2	Mutant	2.86601	6.41357	4.46974	4.04313	NA	NA	NA	Low	NA	Low_NA
BRD:BRD-K62008436-001-22-1	ACH-000256	0.550747	PACLITAXEL	2.5	COV318_OVARY	Female	OVARY	NA	NA	NA	2	Mutant	3.3086	4.63885	3.87692	4.30437	NA	NA	NA	High	NA	High_NA
BRD:BRD-K62008436-001-22-1	ACH-000259	-3.06078	PACLITAXEL	2.5	KELLY_AUTONOMIC_GANGLIA	Female	AUTONOMIC_GANGLIA	Peripheral Nervous System	Neuroblastoma	NA	0	WT	3.7555	4.93138	5.21384	4.41777	NA	5.01452	NA	Low	High	Low_High
BRD:BRD-K62008436-001-22-1	ACH-000260	-1.42163	PACLITAXEL	2.5	SKNAS_AUTONOMIC_GANGLIA	Female	AUTONOMIC_GANGLIA	Peripheral Nervous System	Neuroblastoma	NA	0	WT	3.57979	4.29195	5.45801	2.95826	NA	4.45208	NA	Low	Low	Low_Low
BRD:BRD-K62008436-001-22-1	ACH-000261	-4.34124	PACLITAXEL	2.5	RERFLCAI_LUNG	Unknown	LUNG	NA	NA	NA	2	Mutant	3.7606	3.59299	4.5187	4.96173	NA	NA	NA	High	NA	High_NA
BRD:BRD-K62008436-001-22-1	ACH-000264	-5.87669	PACLITAXEL	2.5	CALU6_LUNG	Female	LUNG	Lung	Non-Small Cell Lung Carcinoma	Lung adenocarcinoma	2	Mutant	3.80378	3.47229	5.49578	3.33598	NA	5.27637	NA	High	High	High_High
BRD:BRD-K62008436-001-22-1	ACH-000265	-1.17782	PACLITAXEL	2.5	KP4_PANCREAS	Male	PANCREAS	Pancreas	Pancreatic Carcinoma	NA	0	WT	3.55188	1.37861	5.09475	4.51572	NA	4.26291	NA	High	High	High_High
BRD:BRD-K62008436-001-22-1	ACH-000266	0.26333	PACLITAXEL	2.5	SNU213_PANCREAS	Unknown	PANCREAS	NA	NA	NA	2	Mutant	2.70819	5.57944	3.7651	3.4745	NA	NA	NA	Low	NA	Low_NA
BRD:BRD-K62008436-001-22-1	ACH-000268	-0.0232695	PACLITAXEL	2.5	SNU245_BILIARY_TRACT	Unknown	BILIARY_TRACT	NA	NA	NA	2	Mutant	4.04675	6.03803	3.89435	3.23478	NA	NA	NA	High	NA	High_NA
BRD:BRD-K62008436-001-22-1	ACH-000270	0.993274	PACLITAXEL	2.5	HPAC_PANCREAS	Female	PANCREAS	Pancreas	Pancreatic Carcinoma	Pancreatic adenocarcinoma	0	WT	3.52223	3.4982	3.96955	4.09816	NA	4.71169	NA	High	High	High_High
BRD:BRD-K62008436-001-22-1	ACH-000273	-3.23697	PACLITAXEL	2.5	SF539_CENTRAL_NERVOUS_SYSTEM	Female	CENTRAL_NERVOUS_SYSTEM	Central Nervous System	Glioblastoma	NA	0	WT	2.64652	4.02338	5.11384	4.0536	NA	2.89057	NA	Low	Low	Low_Low
BRD:BRD-K62008436-001-22-1	ACH-000274	-1.24952	PACLITAXEL	2.5	HS852T_SKIN	Unknown	SKIN	NA	NA	NA	0	WT	3.01193	4.44475	4.50603	3.29827	NA	NA	NA	Low	NA	Low_NA
BRD:BRD-K62008436-001-22-1	ACH-000276	-0.47164	PACLITAXEL	2.5	HCC38_BREAST	Female	BREAST	Breast	Breast Carcinoma	Ductal Breast Carcinoma	2	Mutant	3.37759	5.11484	5.33533	4.3315	3.1085	4.71238	NA	Low	High	Low_High
BRD:BRD-K62008436-001-22-1	ACH-000277	-0.030976	PACLITAXEL	2.5	HCC1419_BREAST	Female	BREAST	Breast	Breast Carcinoma	Ductal Breast Carcinoma	1	Mutant	4.07747	4.1419	3.98431	3.1202	NA	3.27915	NA	High	Low	High_Low
BRD:BRD-K62008436-001-22-1	ACH-000278	-3.0753	PACLITAXEL	2.5	COV362_OVARY	Female	OVARY	NA	NA	NA	2	Mutant	2.93007	5.92095	4.25427	2.48943	NA	NA	NA	Low	NA	Low_NA
BRD:BRD-K62008436-001-22-1	ACH-000279	-3.20758	PACLITAXEL	2.5	EWS502_BONE	Unknown	BONE	NA	NA	NA	2	Mutant	3.99206	6.72125	4.87304	4.58394	NA	NA	NA	High	NA	High_NA
BRD:BRD-K62008436-001-22-1	ACH-000280	-2.46527	PACLITAXEL	2.5	SNU840_OVARY	Female	OVARY	NA	NA	NA	0	WT	3.23038	4.01126	4.67911	4.03611	NA	NA	NA	Low	NA	Low_NA
BRD:BRD-K62008436-001-22-1	ACH-000281	-1.27842	PACLITAXEL	2.5	KP2_PANCREAS	Female	PANCREAS	Pancreas	Pancreatic Carcinoma	NA	2	Mutant	3.59583	5.23236	4.17145	5.12665	NA	3.80566	NA	High	High	High_High
BRD:BRD-K62008436-001-22-1	ACH-000288	-2.2546	PACLITAXEL	2.5	BT549_BREAST	Female	BREAST	Breast	Breast Carcinoma	Invasive Ductal Carcinoma of No Special Type	2	Mutant	2.97938	7.04794	4.53751	4.57153	4.05182	3.87587	NA	Low	Low	Low_Low
BRD:BRD-K62008436-001-22-1	ACH-000289	-1.48074	PACLITAXEL	2.5	SNU466_CENTRAL_NERVOUS_SYSTEM	Unknown	CENTRAL_NERVOUS_SYSTEM	NA	NA	NA	0	WT	3.38287	5.30944	4.11934	2.7971	NA	NA	NA	High	NA	High_NA
BRD:BRD-K62008436-001-22-1	ACH-000291	0.406722	PACLITAXEL	2.5	NA	Female	NA	Ovary	Ovarian Carcinoma	Ovarian adenocarcinoma	2	Mutant	3.21718	4.91098	3.47708	3.81843	NA	3.03941	NA	Low	Low	Low_Low
BRD:BRD-K62008436-001-22-1	ACH-000292	-3.89011	PACLITAXEL	2.5	NCIH841_LUNG	Unknown	LUNG	NA	NA	NA	2	Mutant	3.56124	7.14276	5.47274	5.21352	NA	NA	NA	High	NA	High_NA
BRD:BRD-K62008436-001-22-1	ACH-000296	-1.74475	PACLITAXEL	2.5	OUMS23_LARGE_INTESTINE	Unknown	LARGE_INTESTINE	NA	NA	NA	2	Mutant	3.51262	6.01689	4.77458	5.33248	NA	NA	NA	Low	NA	Low_NA
BRD:BRD-K62008436-001-22-1	ACH-000302	0.0397996	PACLITAXEL	2.5	SNU1077_ENDOMETRIUM	Female	ENDOMETRIUM	NA	NA	NA	2	Mutant	3.08142	5.0518	4.05606	3.75967	NA	NA	NA	Low	NA	Low_NA
BRD:BRD-K62008436-001-22-1	ACH-000305	-0.627269	PACLITAXEL	2.5	ECGI10_OESOPHAGUS	Male	OESOPHAGUS	Esophagus	Esophageal Carcinoma	Esophageal Squamous Cell Carcinoma	2	Mutant	2.91205	6.45621	4.78038	3.22147	4.06244	3.84001	NA	Low	Low	Low_Low
BRD:BRD-K62008436-001-22-1	ACH-000307	-3.61835	PACLITAXEL	2.5	PK1_PANCREAS	Unknown	PANCREAS	NA	NA	NA	2	Mutant	3.05204	4.98599	5.1053	4.02729	NA	NA	NA	Low	NA	Low_NA
BRD:BRD-K62008436-001-22-1	ACH-000308	-4.2019	PACLITAXEL	2.5	EFO21_OVARY	Female	OVARY	Ovary	Ovarian Carcinoma	Ovarian Cystadenocarcinoma	0	WT	3.13848	7.03288	4.45485	5.56959	3.90798	4.42694	1.77425	Low	High	Low_High
BRD:BRD-K62008436-001-22-1	ACH-000309	-0.385408	PACLITAXEL	2.5	SKLU1_LUNG	Female	LUNG	Lung	Non-Small Cell Lung Carcinoma	Lung Adenocarcinoma	2	Mutant	NA	NA	NA	NA	NA	5.17448	NA	NA	High	NA_High
BRD:BRD-K62008436-001-22-1	ACH-000311	-3.94545	PACLITAXEL	2.5	NCIH2122_LUNG	Female	LUNG	Lung	Non-Small Cell Lung Carcinoma	Lung Adenocarcinoma	1	Mutant	3.32101	5.04962	3.41655	3.44648	-1.23094	3.66073	NA	Low	Low	Low_Low
BRD:BRD-K62008436-001-22-1	ACH-000312	-1.78284	PACLITAXEL	2.5	SKNBE2_AUTONOMIC_GANGLIA	Unknown	AUTONOMIC_GANGLIA	NA	NA	NA	2	Mutant	3.99727	6.07306	5.39663	3.8925	NA	NA	NA	High	NA	High_NA
BRD:BRD-K62008436-001-22-1	ACH-000313	-1.25965	PACLITAXEL	2.5	KMRC3_KIDNEY	Unknown	KIDNEY	NA	NA	NA	1	Mutant	3.71508	5.36485	5.38534	3.85442	NA	NA	NA	High	NA	High_NA
BRD:BRD-K62008436-001-22-1	ACH-000316	-5.004	PACLITAXEL	2.5	SNU886_LIVER	Unknown	LIVER	NA	NA	NA	0	WT	3.51623	1.51731	5.11925	3.55085	NA	NA	NA	Low	NA	Low_NA
BRD:BRD-K62008436-001-22-1	ACH-000318	-4.15816	PACLITAXEL	2.5	TE10_OESOPHAGUS	Male	OESOPHAGUS	Esophagus	Esophageal Carcinoma	Esophageal Squamous Cell Carcinoma	2	Mutant	3.51382	4.83101	4.13863	2.83756	3.2845	4.38894	NA	High	High	High_High
BRD:BRD-K62008436-001-22-1	ACH-000319	-0.153742	PACLITAXEL	2.5	MPP89_PLEURA	Male	PLEURA	Lung	Mesothelioma	Pleural Epithelioid Mesothelioma	0	WT	3.29608	1.98805	4.52214	2.90273	NA	4.00016	NA	High	Low	High_Low
BRD:BRD-K62008436-001-22-1	ACH-000320	-3.47139	PACLITAXEL	2.5	PSN1_PANCREAS	Male	PANCREAS	Pancreas	Pancreatic Carcinoma	Pancreatic adenocarcinoma	2	Mutant	4.29405	3.66145	4.9757	4.04488	2.47997	4.0774	NA	High	High	High_High
BRD:BRD-K62008436-001-22-1	ACH-000322	-0.947059	PACLITAXEL	2.5	HT144_SKIN	Male	SKIN	Skin	Melanoma	NA	0	WT	3.37495	5.36025	4.30861	3.04384	NA	4.18221	NA	Low	High	Low_High
BRD:BRD-K62008436-001-22-1	ACH-000323	-2.07202	PACLITAXEL	2.5	42MGBA_CENTRAL_NERVOUS_SYSTEM	Male	CENTRAL_NERVOUS_SYSTEM	Central Nervous System	Glioblastoma	NA	2	Mutant	2.93722	4.95384	5.42211	4.17883	NA	3.92478	NA	Low	Low	Low_Low
BRD:BRD-K62008436-001-22-1	ACH-000324	-1.7583	PACLITAXEL	2.5	JHOC5_OVARY	Female	OVARY	NA	NA	NA	0	WT	2.3358	4.96079	4.08077	4.14477	NA	NA	NA	Low	NA	Low_NA
BRD:BRD-K62008436-001-22-1	ACH-000329	-1.28071	PACLITAXEL	2.5	CCFSTTG1_CENTRAL_NERVOUS_SYSTEM	Unknown	CENTRAL_NERVOUS_SYSTEM	NA	NA	NA	0	WT	3.20237	4.48144	4.77361	4.15539	NA	NA	NA	Low	NA	Low_NA
BRD:BRD-K62008436-001-22-1	ACH-000330	-1.40868	PACLITAXEL	2.5	EFM19_BREAST	Female	BREAST	Breast	Breast Carcinoma	Ductal Breast Carcinoma	2	Mutant	4.30465	5.10059	4.41238	3.53636	NA	4.34296	NA	High	High	High_High
BRD:BRD-K62008436-001-22-1	ACH-000331	-0.532363	PACLITAXEL	2.5	ISTMES2_PLEURA	Unknown	PLEURA	NA	NA	NA	2	Mutant	3.15548	5.18055	4.95949	3.46183	NA	NA	NA	Low	NA	Low_NA
BRD:BRD-K62008436-001-22-1	ACH-000332	0.182889	PACLITAXEL	2.5	YAPC_PANCREAS	Male	PANCREAS	Pancreas	Pancreatic Carcinoma	NA	2	Mutant	3.8921	5.93068	4.48447	5.61608	2.16123	4.36624	1.49758	High	High	High_High
BRD:BRD-K62008436-001-22-1	ACH-000335	-3.06241	PACLITAXEL	2.5	MSTO211H_PLEURA	Male	PLEURA	Lung	Mesothelioma	Pleural Biphasic Mesothelioma	0	WT	3.16008	4.83101	4.59967	4.31836	NA	3.81144	0.60081	High	Low	High_Low
BRD:BRD-K62008436-001-22-1	ACH-000341	-0.417419	PACLITAXEL	2.5	SKNFI_AUTONOMIC_GANGLIA	Male	AUTONOMIC_GANGLIA	Peripheral Nervous System	Neuroblastoma	NA	2	Mutant	4.68097	5.7487	6.503	5.09049	1.57346	5.81268	NA	High	High	High_High
BRD:BRD-K62008436-001-22-1	ACH-000343	-1.62221	PACLITAXEL	2.5	NCIH522_LUNG	Male	LUNG	Lung	Non-Small Cell Lung Carcinoma	Lung Adenocarcinoma	0	WT	4.63219	1.77681	5.17493	4.70517	NA	3.85626	NA	High	Low	High_Low
BRD:BRD-K62008436-001-22-1	ACH-000344	-1.13589	PACLITAXEL	2.5	SNU668_STOMACH	Unknown	STOMACH	NA	NA	NA	2	Mutant	3.80575	4.52715	3.99246	3.61557	NA	NA	NA	High	NA	High_NA
BRD:BRD-K62008436-001-22-1	ACH-000347	0.10031	PACLITAXEL	2.5	QGP1_PANCREAS	Male	PANCREAS	Pancreas	Other Solid Carcinomas	Pancreatic somatostatinoma	0	WT	4.18821	3.63376	5.83771	4.02552	NA	5.81586	NA	High	High	High_High
BRD:BRD-K62008436-001-22-1	ACH-000348	-2.1268	PACLITAXEL	2.5	RPMI7951_SKIN	Female	SKIN	Skin	Melanoma	NA	0	WT	3.83413	3.39179	5.17158	4.11747	NA	3.964	NA	High	High	High_High
BRD:BRD-K62008436-001-22-1	ACH-000350	-0.598691	PACLITAXEL	2.5	COLO678_LARGE_INTESTINE	Male	LARGE_INTESTINE	Large Intestine	Colorectal Carcinoma	NA	0	WT	3.1979	5.65674	4.99173	3.2274	NA	4.43883	NA	Low	High	Low_High
BRD:BRD-K62008436-001-22-1	ACH-000351	-4.01709	PACLITAXEL	2.5	MKN1_STOMACH	Unknown	STOMACH	NA	NA	NA	2	Mutant	3.67567	6.23888	4.04669	4.32202	NA	NA	NA	Low	NA	Low_NA
BRD:BRD-K62008436-001-22-1	ACH-000352	-0.992236	PACLITAXEL	2.5	HCC1428_BREAST	Female	BREAST	Breast	Breast Carcinoma	Breast adenocarcinoma	0	WT	3.93344	6.3973	3.9513	4.21921	NA	3.48564	NA	High	Low	High_Low
BRD:BRD-K62008436-001-22-1	ACH-000356	-2.87605	PACLITAXEL	2.5	MKN45_STOMACH	Female	STOMACH	Stomach	Gastric Carcinoma	Gastric adenocarcinoma	1	Mutant	4.28051	5.45765	3.9679	4.08544	NA	3.31351	NA	High	Low	High_Low
BRD:BRD-K62008436-001-22-1	ACH-000359	-1.81429	PACLITAXEL	2.5	MG63_BONE	Male	BONE	Bone	Osteosarcoma	NA	0	WT	2.25873	2.22547	4.82085	3.84052	NA	4.12352	NA	Low	High	Low_High
BRD:BRD-K62008436-001-22-1	ACH-000361	-3.1256	PACLITAXEL	2.5	SKHEP1_LIVER	Male	LIVER	Liver	Hepatocellular Carcinoma	NA	0	WT	3.04377	5.63977	4.40188	3.76492	NA	4.57757	NA	Low	High	Low_High
BRD:BRD-K62008436-001-22-1	ACH-000364	-2.31695	PACLITAXEL	2.5	U2OS_BONE	Female	BONE	Bone	Osteosarcoma	NA	0	WT	3.93163	4.75982	4.99299	4.9525	NA	3.96255	NA	Low	Low	Low_Low
BRD:BRD-K62008436-001-22-1	ACH-000366	-1.01504	PACLITAXEL	2.5	SKNDZ_AUTONOMIC_GANGLIA	Female	AUTONOMIC_GANGLIA	Peripheral Nervous System	Neuroblastoma	NA	2	Mutant	3.96924	6.96268	5.49518	3.82146	3.78907	4.65571	NA	High	Low	High_Low
BRD:BRD-K62008436-001-22-1	ACH-000367	-2.0638	PACLITAXEL	2.5	NCIH226_LUNG	Male	LUNG	Lung	Mesothelioma	Pleural Epithelioid Mesothelioma	0	WT	2.45427	6.30646	2.86194	3.53029	NA	2.8974	NA	Low	Low	Low_Low
BRD:BRD-K62008436-001-22-1	ACH-000368	-2.8349	PACLITAXEL	2.5	SNU1105_CENTRAL_NERVOUS_SYSTEM	Unknown	CENTRAL_NERVOUS_SYSTEM	NA	NA	NA	2	Mutant	2.36501	5.25267	4.81991	3.83853	NA	NA	NA	Low	NA	Low_NA
BRD:BRD-K62008436-001-22-1	ACH-000374	-2.84803	PACLITAXEL	2.5	HCC1143_BREAST	Female	BREAST	Breast	Breast Carcinoma	Ductal Breast Carcinoma	2	Mutant	3.22892	7.30122	4.80622	2.69004	4.70194	4.09901	NA	Low	High	Low_High
BRD:BRD-K62008436-001-22-1	ACH-000375	-3.37592	PACLITAXEL	2.5	G402_SOFT_TISSUE	Female	SOFT_TISSUE	Soft Tissue	Other Sarcomas	Epithelioid Cell Type Gastrointestinal Stromal Tumor	0	WT	3.546	5.64418	5.02412	4.33223	NA	4.41025	NA	Low	Low	Low_Low
BRD:BRD-K62008436-001-22-1	ACH-000376	-0.133343	PACLITAXEL	2.5	SF295_CENTRAL_NERVOUS_SYSTEM	Female	CENTRAL_NERVOUS_SYSTEM	Central Nervous System	Glioblastoma	NA	2	Mutant	3.02206	5.47745	4.36678	4.17883	4.06302	3.92227	NA	Low	Low	Low_Low
BRD:BRD-K62008436-001-22-1	ACH-000378	-1.46315	PACLITAXEL	2.5	NCIH647_LUNG	Male	LUNG	Lung	Non-Small Cell Lung Carcinoma	Adenosquamous lung carcinoma	0	WT	3.24492	5.52994	4.04747	4.59503	NA	3.59194	NA	Low	Low	Low_Low
BRD:BRD-K62008436-001-22-1	ACH-000383	-0.644142	PACLITAXEL	2.5	OE33_OESOPHAGUS	Female	OESOPHAGUS	Esophagus	Esophageal Carcinoma	Barrett Adenocarcinoma	2	Mutant	3.59355	4.68841	3.78386	3.80011	NA	4.05444	NA	High	Low	High_Low
BRD:BRD-K62008436-001-22-1	ACH-000384	-1.58948	PACLITAXEL	2.5	SW780_URINARY_TRACT	Female	URINARY_TRACT	Bladder	Bladder Carcinoma	NA	0	WT	4.48032	5.54412	6.00031	4.05707	NA	4.25563	NA	High	High	High_High
BRD:BRD-K62008436-001-22-1	ACH-000389	-2.01588	PACLITAXEL	2.5	H4_CENTRAL_NERVOUS_SYSTEM	Male	CENTRAL_NERVOUS_SYSTEM	Central Nervous System	Glioma	Low Grade Glioma	0	WT	3.16772	5.58555	5.43061	4.61515	NA	4.39757	NA	Low	High	Low_High
BRD:BRD-K62008436-001-22-1	ACH-000390	-1.61409	PACLITAXEL	2.5	LUDLU1_LUNG	Unknown	LUNG	NA	NA	NA	2	Mutant	3.50415	5.34386	4.6051	4.70745	NA	NA	NA	High	NA	High_NA
BRD:BRD-K62008436-001-22-1	ACH-000391	-3.42742	PACLITAXEL	2.5	MHHES1_BONE	Male	BONE	Bone	Ewing's Sarcoma	NA	0	WT	3.66266	6.1323	4.57611	5.54048	2.63306	4.04674	NA	Low	High	Low_High
BRD:BRD-K62008436-001-22-1	ACH-000393	-1.34799	PACLITAXEL	2.5	HLF_LIVER	Unknown	LIVER	NA	NA	NA	2	Mutant	2.91928	5.26857	4.31124	4.71201	NA	NA	NA	Low	NA	Low_NA
BRD:BRD-K62008436-001-22-1	ACH-000395	-1.79121	PACLITAXEL	2.5	NCIH520_LUNG	Male	LUNG	Lung	Non-Small Cell Lung Carcinoma	Squamous Cell Lung Carcinoma	2	Mutant	4.21913	3.16402	4.44163	7.4675	NA	3.71257	NA	High	Low	High_Low
BRD:BRD-K62008436-001-22-1	ACH-000396	-3.14986	PACLITAXEL	2.5	J82_URINARY_TRACT	Male	URINARY_TRACT	Bladder	Bladder Carcinoma	NA	1	Mutant	2.45674	4.25545	4.67187	2.64334	NA	3.49803	NA	Low	Low	Low_Low
BRD:BRD-K62008436-001-22-1	ACH-000397	-1.83333	PACLITAXEL	2.5	TEN_ENDOMETRIUM	Female	ENDOMETRIUM	NA	NA	NA	2	Mutant	4.05845	3.38389	5.15018	4.87041	NA	NA	NA	High	NA	High_NA
BRD:BRD-K62008436-001-22-1	ACH-000399	0.337031	PACLITAXEL	2.5	NCIH2196_LUNG	Unknown	LUNG	NA	NA	NA	2	Mutant	4.01195	5.25229	4.7852	5.16453	NA	NA	NA	High	NA	High_NA
BRD:BRD-K62008436-001-22-1	ACH-000400	-1.2672	PACLITAXEL	2.5	NA	Male	NA	Large Intestine	Colorectal Carcinoma	Colon adenocarcinoma	0	WT	2.70819	5.60796	4.14304	3.00335	NA	4.3321	NA	Low	High	Low_High
BRD:BRD-K62008436-001-22-1	ACH-000401	-3.65175	PACLITAXEL	2.5	COLO800_SKIN	Male	SKIN	Skin	Melanoma	Cutaneous melanoma	2	Mutant	2.92109	6.00332	4.64361	3.38621	NA	3.77155	NA	Low	High	Low_High
BRD:BRD-K62008436-001-22-1	ACH-000403	-3.1832	PACLITAXEL	2.5	NCIH747_LARGE_INTESTINE	Male	LARGE_INTESTINE	Large Intestine	Colorectal Carcinoma	Cecum adenocarcinoma	2	Mutant	3.44602	6.03713	3.56141	4.28651	2.92282	3.8096	NA	Low	Low	Low_Low
BRD:BRD-K62008436-001-22-1	ACH-000404	-0.937814	PACLITAXEL	2.5	K029AX_SKIN	Unknown	SKIN	NA	NA	NA	0	WT	3.17381	4.50415	4.73979	4.09816	NA	NA	NA	Low	NA	Low_NA
BRD:BRD-K62008436-001-22-1	ACH-000407	-2.88088	PACLITAXEL	2.5	SNU685_ENDOMETRIUM	Female	ENDOMETRIUM	NA	NA	NA	0	WT	3.2636	4.06505	4.50718	4.3844	NA	NA	NA	Low	NA	Low_NA
BRD:BRD-K62008436-001-22-1	ACH-000408	-2.26553	PACLITAXEL	2.5	TE5_OESOPHAGUS	Female	OESOPHAGUS	Esophagus	Esophageal Carcinoma	Esophageal Squamous Cell Carcinoma	2	Mutant	4.33117	4.8703	4.16928	5.45185	3.18719	3.44245	NA	High	Low	High_Low
BRD:BRD-K62008436-001-22-1	ACH-000411	-5.19709	PACLITAXEL	2.5	769P_KIDNEY	Female	KIDNEY	Kidney	Kidney Carcinoma	Clear Cell Renal Cell Carcinoma	0	WT	2.18039	5.26593	4.09221	2.26727	NA	3.67798	NA	Low	Low	Low_Low
BRD:BRD-K62008436-001-22-1	ACH-000414	-4.65495	PACLITAXEL	2.5	NCIH1944_LUNG	Female	LUNG	Lung	Non-Small Cell Lung Carcinoma	Lung Adenocarcinoma	0	WT	3.17533	4.37473	3.29544	3.58296	NA	3.0982	NA	Low	Low	Low_Low
BRD:BRD-K62008436-001-22-1	ACH-000415	-0.905254	PACLITAXEL	2.5	BICR6_UPPER_AERODIGESTIVE_TRACT	Unknown	UPPER_AERODIGESTIVE_TRACT	NA	NA	NA	2	Mutant	1.74287	1.47092	1.88913	1.97518	NA	NA	NA	Low	NA	Low_NA
BRD:BRD-K62008436-001-22-1	ACH-000416	-4.83524	PACLITAXEL	2.5	NCIH838_LUNG	Male	LUNG	Lung	Non-Small Cell Lung Carcinoma	Lung Adenocarcinoma	2	Mutant	2.46659	3.19277	3.94713	4.11747	NA	5.18992	NA	Low	High	Low_High
BRD:BRD-K62008436-001-22-1	ACH-000417	-2.78779	PACLITAXEL	2.5	PANC0813_PANCREAS	Male	PANCREAS	Pancreas	Pancreatic Carcinoma	Pancreatic ductal adenocarcinoma	0	WT	3.33468	6.49267	4.5964	4.07775	NA	3.89698	NA	Low	High	Low_High
BRD:BRD-K62008436-001-22-1	ACH-000418	-3.26281	PACLITAXEL	2.5	SW1353_BONE	Unknown	BONE	NA	NA	NA	0	WT	3.26217	4.95569	5.00801	5.22951	NA	NA	NA	Low	NA	Low_NA
BRD:BRD-K62008436-001-22-1	ACH-000420	-2.16594	PACLITAXEL	2.5	SNU449_LIVER	Male	LIVER	Liver	Hepatocellular Carcinoma	NA	2	Mutant	3.00854	5.41214	4.70975	4.09816	2.12237	3.59821	NA	Low	Low	Low_Low
BRD:BRD-K62008436-001-22-1	ACH-000421	-2.21419	PACLITAXEL	2.5	SW837_LARGE_INTESTINE	Male	LARGE_INTESTINE	Large Intestine	Colorectal Carcinoma	Rectal adenocarcinoma	2	Mutant	4.0358	6.00148	5.24363	5.59301	3.01892	4.28851	1.97672	High	High	High_High
BRD:BRD-K62008436-001-22-1	ACH-000423	-1.61063	PACLITAXEL	2.5	SKMEL3_SKIN	Female	SKIN	Skin	Melanoma	Cutaneous melanoma	2	Mutant	3.52821	5.16893	4.49558	4.04313	3.34951	3.47774	NA	High	Low	High_Low
BRD:BRD-K62008436-001-22-1	ACH-000425	-3.50861	PACLITAXEL	2.5	UACC62_SKIN	Unknown	SKIN	Skin	Melanoma	NA	0	WT	2.67448	3.83531	4.14965	3.69204	NA	3.48894	NA	Low	Low	Low_Low
BRD:BRD-K62008436-001-22-1	ACH-000428	-0.381408	PACLITAXEL	2.5	UO31_KIDNEY	Female	KIDNEY	Kidney	Kidney Carcinoma	NA	0	WT	2.76336	6.28554	3.5668	4.11664	NA	3.45979	NA	Low	Low	Low_Low
BRD:BRD-K62008436-001-22-1	ACH-000429	0.459773	PACLITAXEL	2.5	A704_KIDNEY	Male	KIDNEY	Kidney	Kidney Carcinoma	NA	0	WT	4.53792	3.48715	3.57002	3.31514	NA	4.04275	NA	High	High	High_High
BRD:BRD-K62008436-001-22-1	ACH-000430	-2.53864	PACLITAXEL	2.5	TYKNU_OVARY	Female	OVARY	Ovary	Ovarian Carcinoma	High grade ovarian serous adenocarcinoma	2	Mutant	3.08465	4.75028	4.43498	4.20429	2.55307	4.29133	2.11942	Low	High	Low_High
BRD:BRD-K62008436-001-22-1	ACH-000433	0.462324	PACLITAXEL	2.5	CAKI1_KIDNEY	Male	KIDNEY	Kidney	Kidney Carcinoma	Clear cell renal cell carcinoma	0	WT	2.36764	4.16012	3.74993	2.71905	NA	4.64807	NA	Low	High	Low_High
BRD:BRD-K62008436-001-22-1	ACH-000434	-1.94603	PACLITAXEL	2.5	NCIH1915_LUNG	Female	LUNG	Lung	Non-Small Cell Lung Carcinoma	NA	0	WT	2.98802	2.97028	3.78479	4.46451	NA	4.04027	1.03288	Low	High	Low_High
BRD:BRD-K62008436-001-22-1	ACH-000435	-3.90651	PACLITAXEL	2.5	EFE184_ENDOMETRIUM	Female	ENDOMETRIUM	NA	NA	NA	2	Mutant	2.11954	5.38206	2.73329	3.28264	NA	NA	NA	Low	NA	Low_NA
BRD:BRD-K62008436-001-22-1	ACH-000437	-3.33651	PACLITAXEL	2.5	SW1088_CENTRAL_NERVOUS_SYSTEM	Male	CENTRAL_NERVOUS_SYSTEM	Central Nervous System	Glioma	Low Grade Glioma	2	Mutant	3.65173	5.70708	4.94268	4.41501	4.08575	3.61506	NA	High	Low	High_Low
BRD:BRD-K62008436-001-22-1	ACH-000441	-0.55674	PACLITAXEL	2.5	SH4_SKIN	Female	SKIN	Skin	Melanoma	NA	0	WT	3.60379	3.99991	4.58052	3.57706	NA	4.3888	NA	High	High	High_High
BRD:BRD-K62008436-001-22-1	ACH-000443	-0.0857804	PACLITAXEL	2.5	OVKATE_OVARY	Female	OVARY	Ovary	Ovarian Carcinoma	High grade ovarian serous adenocarcinoma	2	Mutant	3.04543	4.77192	5.11384	3.87504	NA	4.44498	NA	Low	High	Low_High
BRD:BRD-K62008436-001-22-1	ACH-000444	-1.11088	PACLITAXEL	2.5	LU99_LUNG	Unknown	LUNG	NA	NA	NA	0	WT	3.00684	4.04648	5.14716	3.34972	NA	NA	NA	Low	NA	Low_NA
BRD:BRD-K62008436-001-22-1	ACH-000445	-3.21651	PACLITAXEL	2.5	KNS60_CENTRAL_NERVOUS_SYSTEM	Unknown	CENTRAL_NERVOUS_SYSTEM	NA	NA	NA	2	Mutant	3.6681	6.34006	4.99383	4.44369	NA	NA	NA	High	NA	High_NA
BRD:BRD-K62008436-001-22-1	ACH-000447	-1.7633	PACLITAXEL	2.5	NCIH2228_LUNG	Female	LUNG	Lung	Non-Small Cell Lung Carcinoma	Lung Adenocarcinoma	2	Mutant	3.1859	3.40356	4.54091	5.19277	NA	4.29162	NA	Low	High	Low_High
BRD:BRD-K62008436-001-22-1	ACH-000449	-4.09724	PACLITAXEL	2.5	MESSA_SOFT_TISSUE	Female	SOFT_TISSUE	Soft Tissue	Other Sarcomas	Uterine Corpus Sarcoma	0	WT	3.24636	6.14623	5.66202	3.85541	NA	5.12099	NA	Low	High	Low_High
BRD:BRD-K62008436-001-22-1	ACH-000450	-1.82283	PACLITAXEL	2.5	MELHO_SKIN	Female	SKIN	Skin	Melanoma	NA	0	WT	3.04377	3.91894	4.54091	3.14224	NA	3.89542	NA	Low	High	Low_High
BRD:BRD-K62008436-001-22-1	ACH-000452	0.0871707	PACLITAXEL	2.5	TE8_OESOPHAGUS	Male	OESOPHAGUS	Esophagus	Esophageal Carcinoma	Esophageal Squamous Cell Carcinoma	2	Mutant	3.25788	5.81245	5.64003	3.69423	2.31101	4.59538	NA	Low	High	Low_High
BRD:BRD-K62008436-001-22-1	ACH-000454	-3.49361	PACLITAXEL	2.5	HCC95_LUNG	Unknown	LUNG	NA	NA	NA	0	WT	3.94877	4.12748	4.83349	5.24614	NA	NA	NA	High	NA	High_NA
BRD:BRD-K62008436-001-22-1	ACH-000456	-5.33651	PACLITAXEL	2.5	BCPAP_THYROID	Female	THYROID	Thyroid	Thyroid Gland Carcinoma	Poorly differentiated thyroid gland carcinoma	2	Mutant	2.98284	6.08689	5.25637	4.52345	4.17263	4.30107	NA	Low	High	Low_High
BRD:BRD-K62008436-001-22-1	ACH-000457	0.177025	PACLITAXEL	2.5	CAL54_KIDNEY	Male	KIDNEY	Kidney	Kidney Carcinoma	NA	0	WT	3.71927	6.12975	4.92567	3.06041	NA	5.21837	NA	High	High	High_High
BRD:BRD-K62008436-001-22-1	ACH-000458	-4.12708	PACLITAXEL	2.5	CJM_SKIN	Unknown	SKIN	NA	NA	NA	2	Mutant	2.20989	5.0422	4.58821	1.9982	NA	NA	NA	Low	NA	Low_NA
BRD:BRD-K62008436-001-22-1	ACH-000461	-1.5092	PACLITAXEL	2.5	SNU1196_BILIARY_TRACT	Unknown	BILIARY_TRACT	NA	NA	NA	2	Mutant	3.36698	7.25171	3.18331	2.446	NA	NA	NA	Low	NA	Low_NA
BRD:BRD-K62008436-001-22-1	ACH-000463	-4.20124	PACLITAXEL	2.5	NCIH460_LUNG	Male	LUNG	Lung	Non-Small Cell Lung Carcinoma	Lung large cell carcinoma	0	WT	3.24492	4.68174	4.44765	4.07089	NA	3.9823	NA	Low	High	Low_High
BRD:BRD-K62008436-001-22-1	ACH-000464	-2.23004	PACLITAXEL	2.5	CAS1_CENTRAL_NERVOUS_SYSTEM	Male	CENTRAL_NERVOUS_SYSTEM	Central Nervous System	Glioblastoma	NA	2	Mutant	2.50294	5.84796	4.32042	3.85245	4.37285	4.3438	NA	Low	High	Low_High
BRD:BRD-K62008436-001-22-1	ACH-000466	-0.378091	PACLITAXEL	2.5	SNU216_STOMACH	Unknown	STOMACH	NA	NA	NA	2	Mutant	3.42057	6.44402	4.7057	4.41225	NA	NA	NA	Low	NA	Low_NA
BRD:BRD-K62008436-001-22-1	ACH-000467	-4.04224	PACLITAXEL	2.5	HCC56_LARGE_INTESTINE	Unknown	LARGE_INTESTINE	NA	NA	NA	2	Mutant	3.09749	5.6715	5.97771	3.58766	NA	NA	NA	Low	NA	Low_NA
BRD:BRD-K62008436-001-22-1	ACH-000468	-2.41561	PACLITAXEL	2.5	PK45H_PANCREAS	Unknown	PANCREAS	NA	NA	NA	0	WT	3.79845	5.97939	4.66191	4.64448	NA	NA	NA	High	NA	High_NA
BRD:BRD-K62008436-001-22-1	ACH-000469	-4.1287	PACLITAXEL	2.5	YH13_CENTRAL_NERVOUS_SYSTEM	Male	CENTRAL_NERVOUS_SYSTEM	Central Nervous System	Glioblastoma	NA	2	Mutant	3.41414	4.68619	5.04493	4.38017	1.77071	4.48728	NA	High	High	High_High
BRD:BRD-K62008436-001-22-1	ACH-000470	-1.18131	PACLITAXEL	2.5	SW1463_LARGE_INTESTINE	Female	LARGE_INTESTINE	Large Intestine	Colorectal Carcinoma	Rectal adenocarcinoma	2	Mutant	4.01452	5.24733	2.74259	3.2926	4.53223	3.16969	NA	High	Low	High_Low
BRD:BRD-K62008436-001-22-1	ACH-000471	-1.30338	PACLITAXEL	2.5	LI7_LIVER	Unknown	LIVER	NA	NA	NA	0	WT	4.3961	2.72345	4.9496	4.76461	NA	NA	NA	High	NA	High_NA
BRD:BRD-K62008436-001-22-1	ACH-000472	-0.593518	PACLITAXEL	2.5	HSC2_UPPER_AERODIGESTIVE_TRACT	Male	UPPER_AERODIGESTIVE_TRACT	Head and Neck	Head and Neck Carcinoma	Oral Cavity Squamous Cell Carcinoma	0	WT	2.39623	3.49942	3.56357	3.86034	NA	3.30734	NA	Low	Low	Low_Low
BRD:BRD-K62008436-001-22-1	ACH-000473	-2.42692	PACLITAXEL	2.5	RT112_URINARY_TRACT	Female	URINARY_TRACT	Bladder	Bladder Carcinoma	NA	1	Mutant	3.71508	5.42577	4.43316	4.16594	2.21812	4.09127	NA	High	Low	High_Low
BRD:BRD-K62008436-001-22-1	ACH-000475	-1.04793	PACLITAXEL	2.5	HUH1_LIVER	Male	LIVER	Liver	Hepatocellular Carcinoma	NA	2	Mutant	2.92289	5.09511	4.36361	3.26396	NA	3.72977	NA	Low	Low	Low_Low
BRD:BRD-K62008436-001-22-1	ACH-000476	-2.12103	PACLITAXEL	2.5	JHH4_LIVER	Male	LIVER	Liver	Hepatocellular Carcinoma	NA	2	Mutant	3.40638	5.18693	4.96804	3.72031	NA	4.37314	NA	Low	High	Low_High
BRD:BRD-K62008436-001-22-1	ACH-000477	-1.10693	PACLITAXEL	2.5	MALME3M_SKIN	Unknown	SKIN	NA	NA	NA	0	WT	3.5659	5.00855	4.69706	3.04883	NA	NA	NA	High	NA	High_NA
BRD:BRD-K62008436-001-22-1	ACH-000479	-2.76846	PACLITAXEL	2.5	KNS81_CENTRAL_NERVOUS_SYSTEM	Unknown	CENTRAL_NERVOUS_SYSTEM	NA	NA	NA	0	WT	4.10433	6.35147	4.72084	4.35173	NA	NA	NA	High	NA	High_NA
BRD:BRD-K62008436-001-22-1	ACH-000481	-2.12828	PACLITAXEL	2.5	NCIH2170_LUNG	Male	LUNG	Lung	Non-Small Cell Lung Carcinoma	Squamous Cell Lung Carcinoma	2	Mutant	3.63407	5.31127	3.15676	4.0475	NA	3.22341	NA	High	Low	High_Low
BRD:BRD-K62008436-001-22-1	ACH-000482	-1.07634	PACLITAXEL	2.5	RERFLCKJ_LUNG	Male	LUNG	Lung	Non-Small Cell Lung Carcinoma	Lung Adenocarcinoma	0	WT	4.16052	3.90221	5.24647	3.44262	NA	4.78127	NA	High	High	High_High
BRD:BRD-K62008436-001-22-1	ACH-000483	-2.02486	PACLITAXEL	2.5	SNU182_LIVER	Unknown	LIVER	NA	NA	NA	2	Mutant	3.29468	5.05831	4.30729	4.01218	NA	NA	NA	Low	NA	Low_NA
BRD:BRD-K62008436-001-22-1	ACH-000484	-1.14802	PACLITAXEL	2.5	VMRCRCW_KIDNEY	Male	KIDNEY	Kidney	Kidney Carcinoma	NA	0	WT	5.30351	5.46692	4.47269	3.11862	NA	3.60782	NA	High	Low	High_Low
BRD:BRD-K62008436-001-22-1	ACH-000485	0.0297031	PACLITAXEL	2.5	GSU_STOMACH	Unknown	STOMACH	NA	NA	NA	1	Mutant	3.31413	5.72248	3.75088	3.47197	NA	NA	NA	Low	NA	Low_NA
BRD:BRD-K62008436-001-22-1	ACH-000486	-2.92846	PACLITAXEL	2.5	KU1919_URINARY_TRACT	Female	URINARY_TRACT	Bladder	Bladder Carcinoma	NA	0	WT	2.73296	4.38968	4.50718	2.77943	NA	4.9821	NA	Low	High	Low_High
BRD:BRD-K62008436-001-22-1	ACH-000488	-3.566	PACLITAXEL	2.5	TE11_OESOPHAGUS	Male	OESOPHAGUS	Esophagus	Esophageal Carcinoma	Esophageal Squamous Cell Carcinoma	2	Mutant	2.41921	5.27608	3.81704	3.47702	2.86937	4.47394	NA	Low	High	Low_High
BRD:BRD-K62008436-001-22-1	ACH-000489	-1.4118	PACLITAXEL	2.5	SW1116_LARGE_INTESTINE	Male	LARGE_INTESTINE	Large Intestine	Colorectal Carcinoma	Colon adenocarcinoma	2	Mutant	3.21275	5.75525	2.60492	3.45417	3.40858	3.10381	NA	Low	Low	Low_Low
BRD:BRD-K62008436-001-22-1	ACH-000493	-4.8802	PACLITAXEL	2.5	SNU423_LIVER	Male	LIVER	Liver	Hepatocellular Carcinoma	NA	0	WT	3.28486	6.1675	4.08612	4.56904	NA	2.57759	1.54224	Low	Low	Low_Low
BRD:BRD-K62008436-001-22-1	ACH-000495	-1.74176	PACLITAXEL	2.5	TUHR4TKB_KIDNEY	Unknown	KIDNEY	NA	NA	NA	0	WT	3.65721	4.82293	3.91756	4.12247	NA	NA	NA	High	NA	High_NA
BRD:BRD-K62008436-001-22-1	ACH-000496	-3.19294	PACLITAXEL	2.5	NCIH1792_LUNG	Male	LUNG	Lung	Non-Small Cell Lung Carcinoma	Lung Adenocarcinoma	0	WT	3.68106	2.14642	4.81803	3.53515	NA	3.94075	NA	High	High	High_High
BRD:BRD-K62008436-001-22-1	ACH-000499	-2.83736	PACLITAXEL	2.5	EW8_BONE	Unknown	BONE	NA	NA	NA	2	Mutant	3.79484	5.98028	4.81237	4.10238	NA	NA	NA	Low	NA	Low_NA
BRD:BRD-K62008436-001-22-1	ACH-000500	-3.37557	PACLITAXEL	2.5	SNU46_UPPER_AERODIGESTIVE_TRACT	Unknown	UPPER_AERODIGESTIVE_TRACT	NA	NA	NA	2	Mutant	3.39598	6.32876	4.33344	4.73517	NA	NA	NA	High	NA	High_NA
BRD:BRD-K62008436-001-22-1	ACH-000502	-1.90815	PACLITAXEL	2.5	TCCPAN2_PANCREAS	Unknown	PANCREAS	NA	NA	NA	0	WT	3.91154	2.185	3.90471	3.38488	NA	NA	NA	High	NA	High_NA
BRD:BRD-K62008436-001-22-1	ACH-000503	-1.53832	PACLITAXEL	2.5	BICR16_UPPER_AERODIGESTIVE_TRACT	Unknown	UPPER_AERODIGESTIVE_TRACT	NA	NA	NA	2	Mutant	2.80099	2.78562	3.42365	3.33736	NA	NA	NA	Low	NA	Low_NA
BRD:BRD-K62008436-001-22-1	ACH-000504	-2.08675	PACLITAXEL	2.5	SNB75_CENTRAL_NERVOUS_SYSTEM	Female	CENTRAL_NERVOUS_SYSTEM	Central Nervous System	Glioblastoma	NA	2	Mutant	3.19491	6.19885	4.53013	4.38861	NA	3.95648	NA	Low	Low	Low_Low
BRD:BRD-K62008436-001-22-1	ACH-000505	-1.76027	PACLITAXEL	2.5	RKN_SOFT_TISSUE	Female	SOFT_TISSUE	Soft Tissue	Leiomyosarcoma	Ovarian Leiomyosarcoma	2	Mutant	3.1859	5.57423	5.50329	3.9069	0.51932	3.72856	NA	Low	Low	Low_Low
BRD:BRD-K62008436-001-22-1	ACH-000507	-2.40597	PACLITAXEL	2.5	KE39_STOMACH	Unknown	STOMACH	NA	NA	NA	2	Mutant	3.96393	5.40183	4.03804	5.23561	NA	NA	NA	High	NA	High_NA
BRD:BRD-K62008436-001-22-1	ACH-000510	-2.45838	PACLITAXEL	2.5	NCIH1299_LUNG	Male	LUNG	Lung	Non-Small Cell Lung Carcinoma	Lung large cell carcinoma	0	WT	2.78526	4.57031	4.49267	3.9521	NA	4.18868	NA	Low	High	Low_High
BRD:BRD-K62008436-001-22-1	ACH-000516	-0.00444345	PACLITAXEL	2.5	CAL78_BONE	Male	BONE	Bone	Chondrosarcoma	NA	0	WT	4.32354	5.49828	5.11152	4.38229	NA	3.7557	NA	High	Low	High_Low
BRD:BRD-K62008436-001-22-1	ACH-000517	-1.17745	PACLITAXEL	2.5	SNU410_PANCREAS	Unknown	PANCREAS	NA	NA	NA	2	Mutant	3.31716	4.98833	4.26528	4.08506	NA	NA	NA	Low	NA	Low_NA
BRD:BRD-K62008436-001-22-1	ACH-000518	-2.99034	PACLITAXEL	2.5	CAL33_UPPER_AERODIGESTIVE_TRACT	Male	UPPER_AERODIGESTIVE_TRACT	Head and Neck	Head and Neck Carcinoma	Tongue Squamous Cell Carcinoma	2	Mutant	3.08948	5.88765	4.54711	5.19944	3.29483	3.34323	NA	High	Low	High_Low
BRD:BRD-K62008436-001-22-1	ACH-000521	-2.26917	PACLITAXEL	2.5	NCIH2030_LUNG	Male	LUNG	Lung	Non-Small Cell Lung Carcinoma	Lung Adenocarcinoma	2	Mutant	3.52223	5.52899	5.6444	4.63979	1.82407	5.21584	NA	High	High	High_High
BRD:BRD-K62008436-001-22-1	ACH-000524	-0.738661	PACLITAXEL	2.5	KURAMOCHI_OVARY	Female	OVARY	Ovary	Ovarian Carcinoma	High grade ovarian serous adenocarcinoma	2	Mutant	3.44602	6.80145	4.30663	4.75689	4.8391	3.8327	1.58398	High	Low	High_Low
BRD:BRD-K62008436-001-22-1	ACH-000527	-2.73771	PACLITAXEL	2.5	OVISE_OVARY	Female	OVARY	Ovary	Ovarian Carcinoma	Ovarian clear cell adenocarcinoma	0	WT	3.19939	5.11234	4.19791	3.94092	NA	3.8125	NA	Low	Low	Low_Low
BRD:BRD-K62008436-001-22-1	ACH-000528	-1.216	PACLITAXEL	2.5	ABC1_LUNG	Male	LUNG	Lung	Non-Small Cell Lung Carcinoma	Lung Adenocarcinoma	2	Mutant	4.36534	6.44454	3.76416	4.88321	2.88178	3.84871	NA	High	Low	High_Low
BRD:BRD-K62008436-001-22-1	ACH-000530	-1.48304	PACLITAXEL	2.5	NA	Male	NA	Lung	Small Cell Lung Carcinoma	NA	2	Mutant	4.12436	3.27301	5.5297	3.85936	NA	5.13826	NA	High	High	High_High
BRD:BRD-K62008436-001-22-1	ACH-000532	-2.17916	PACLITAXEL	2.5	SNU61_LARGE_INTESTINE	Male	LARGE_INTESTINE	Large Intestine	Colorectal Carcinoma	Rectal adenocarcinoma	2	Mutant	3.58182	5.94338	3.2779	4.23982	NA	4.09849	0.04254	Low	High	Low_High
BRD:BRD-K62008436-001-22-1	ACH-000533	-0.842482	PACLITAXEL	2.5	NCIH2004RT_SOFT_TISSUE	Unknown	SOFT_TISSUE	NA	NA	NA	0	WT	2.47393	5.94756	4.28135	3.95581	NA	NA	NA	Low	NA	Low_NA
BRD:BRD-K62008436-001-22-1	ACH-000535	-1.37407	PACLITAXEL	2.5	BXPC3_PANCREAS	Female	PANCREAS	Pancreas	Pancreatic Carcinoma	Pancreatic ductal adenocarcinoma	2	Mutant	2.42427	6.0651	4.05528	4.5183	0.96498	3.38109	NA	Low	Low	Low_Low
BRD:BRD-K62008436-001-22-1	ACH-000537	-1.89364	PACLITAXEL	2.5	SNU761_LIVER	Unknown	LIVER	NA	NA	NA	0	WT	2.93543	3.0662	5.05784	2.62164	NA	NA	NA	Low	NA	Low_NA
BRD:BRD-K62008436-001-22-1	ACH-000542	-0.470649	PACLITAXEL	2.5	HEYA8_OVARY	Female	OVARY	NA	NA	NA	0	WT	2.48124	5.27908	3.04865	3.52541	NA	NA	NA	Low	NA	Low_NA
BRD:BRD-K62008436-001-22-1	ACH-000543	-0.928659	PACLITAXEL	2.5	SNU489_CENTRAL_NERVOUS_SYSTEM	Unknown	CENTRAL_NERVOUS_SYSTEM	NA	NA	NA	0	WT	2.49814	4.45902	4.72984	3.87991	NA	NA	NA	Low	NA	Low_NA
BRD:BRD-K62008436-001-22-1	ACH-000544	-3.90937	PACLITAXEL	2.5	OE21_OESOPHAGUS	Male	OESOPHAGUS	Esophagus	Esophageal Carcinoma	Esophageal Squamous Cell Carcinoma	0	WT	2.06577	1.72201	2.92239	2.5363	NA	3.67811	NA	Low	Low	Low_Low
BRD:BRD-K62008436-001-22-1	ACH-000545	-1.34503	PACLITAXEL	2.5	VMCUB1_URINARY_TRACT	Unknown	URINARY_TRACT	NA	NA	NA	2	Mutant	4.27765	5.19486	5.10413	3.8164	NA	NA	NA	High	NA	High_NA
BRD:BRD-K62008436-001-22-1	ACH-000547	-2.22889	PACLITAXEL	2.5	HT1197_URINARY_TRACT	Male	URINARY_TRACT	Bladder	Bladder Carcinoma	NA	0	WT	2.86601	5.32657	2.87389	4.45313	NA	3.40589	NA	Low	Low	Low_Low
BRD:BRD-K62008436-001-22-1	ACH-000548	-1.10102	PACLITAXEL	2.5	BHY_UPPER_AERODIGESTIVE_TRACT	Male	UPPER_AERODIGESTIVE_TRACT	Head and Neck	Head and Neck Carcinoma	Head and Neck Squamous Cell Carcinoma	0	WT	3.34957	3.5803	4.67859	4.02906	NA	4.01614	NA	High	High	High_High
BRD:BRD-K62008436-001-22-1	ACH-000549	-3.70558	PACLITAXEL	2.5	SNU1076_UPPER_AERODIGESTIVE_TRACT	Unknown	UPPER_AERODIGESTIVE_TRACT	NA	NA	NA	0	WT	3.16008	3.16707	4.37437	4.81282	NA	NA	NA	High	NA	High_NA
BRD:BRD-K62008436-001-22-1	ACH-000552	-2.61098	PACLITAXEL	2.5	HT29_LARGE_INTESTINE	Female	LARGE_INTESTINE	Large Intestine	Colorectal Carcinoma	Colon adenocarcinoma	2	Mutant	4.02818	5.82966	4.71681	4.35818	4.38313	4.20714	NA	High	High	High_High
BRD:BRD-K62008436-001-22-1	ACH-000553	-4.43514	PACLITAXEL	2.5	SQ1_LUNG	Unknown	LUNG	NA	NA	NA	0	WT	3.35227	3.32055	3.58922	4.29174	NA	NA	NA	Low	NA	Low_NA
BRD:BRD-K62008436-001-22-1	ACH-000555	0.497801	PACLITAXEL	2.5	A498_KIDNEY	Female	KIDNEY	Kidney	Kidney Carcinoma	NA	0	WT	3.509	5.52423	4.83022	2.57731	NA	4.69792	NA	High	High	High_High
BRD:BRD-K62008436-001-22-1	ACH-000558	-2.08259	PACLITAXEL	2.5	A172_CENTRAL_NERVOUS_SYSTEM	Male	CENTRAL_NERVOUS_SYSTEM	Central Nervous System	Glioblastoma	NA	0	WT	3.93072	6.30834	4.68785	3.0637	NA	4.61061	NA	High	High	High_High
BRD:BRD-K62008436-001-22-1	ACH-000561	-3.16546	PACLITAXEL	2.5	TT_OESOPHAGUS	Male	OESOPHAGUS	Esophagus	Esophageal Carcinoma	Esophageal Squamous Cell Carcinoma	1	Mutant	3.8865	4.75452	5.06625	3.41533	2.97113	4.67734	NA	High	High	High_High
BRD:BRD-K62008436-001-22-1	ACH-000562	0.206415	PACLITAXEL	2.5	HCC78_LUNG	Male	LUNG	Lung	Non-Small Cell Lung Carcinoma	Lung Adenocarcinoma	2	Mutant	2.66379	4.24283	4.43437	3.9632	2.90207	4.38087	2.09297	Low	High	Low_High
BRD:BRD-K62008436-001-22-1	ACH-000563	-2.52269	PACLITAXEL	2.5	EBC1_LUNG	Male	LUNG	Lung	Non-Small Cell Lung Carcinoma	Squamous Cell Lung Carcinoma	2	Mutant	3.14158	2.70283	4.00539	3.67327	NA	3.62261	NA	Low	Low	Low_Low
BRD:BRD-K62008436-001-22-1	ACH-000565	-3.73853	PACLITAXEL	2.5	RCM1_LARGE_INTESTINE	Female	LARGE_INTESTINE	Large Intestine	Colorectal Carcinoma	Rectal adenocarcinoma	2	Mutant	3.40638	2.92441	4.21061	3.1547	NA	4.09352	NA	Low	High	Low_High
BRD:BRD-K62008436-001-22-1	ACH-000566	-3.33436	PACLITAXEL	2.5	SW1710_URINARY_TRACT	Female	URINARY_TRACT	Bladder	Bladder Carcinoma	NA	2	Mutant	3.3855	5.3392	4.57223	3.74701	4.14516	3.28443	NA	High	Low	High_Low
BRD:BRD-K62008436-001-22-1	ACH-000569	-2.86144	PACLITAXEL	2.5	ISTMES1_PLEURA	Female	PLEURA	Lung	Mesothelioma	Pleural Epithelioid Mesothelioma	0	WT	2.77336	6.39232	3.63205	3.57942	NA	3.32483	NA	Low	Low	Low_Low
BRD:BRD-K62008436-001-22-1	ACH-000570	-2.68545	PACLITAXEL	2.5	YKG1_CENTRAL_NERVOUS_SYSTEM	Female	CENTRAL_NERVOUS_SYSTEM	Central Nervous System	Glioblastoma	NA	0	WT	3.59355	6.73338	5.56114	4.15376	NA	4.49076	NA	High	High	High_High
BRD:BRD-K62008436-001-22-1	ACH-000571	-3.65343	PACLITAXEL	2.5	T98G_CENTRAL_NERVOUS_SYSTEM	Male	CENTRAL_NERVOUS_SYSTEM	Central Nervous System	Glioblastoma	NA	2	Mutant	3.53297	6.6173	5.45677	4.35245	3.3825	3.45725	2.12732	High	Low	High_Low
BRD:BRD-K62008436-001-22-1	ACH-000572	-2.68451	PACLITAXEL	2.5	G361_SKIN	Male	SKIN	Skin	Melanoma	NA	0	WT	3.74421	3.59069	5.21167	3.64299	NA	4.66117	NA	High	High	High_High
BRD:BRD-K62008436-001-22-1	ACH-000573	-3.22299	PACLITAXEL	2.5	MDAMB436_BREAST	Female	BREAST	Breast	Breast Carcinoma	Invasive Ductal Carcinoma of No Special Type	0	WT	3.8097	5.06264	6.04702	3.59469	NA	4.22769	NA	High	High	High_High
BRD:BRD-K62008436-001-22-1	ACH-000579	-2.76257	PACLITAXEL	2.5	UACC257_SKIN	Unknown	SKIN	Skin	Melanoma	NA	0	WT	3.12285	4.46738	4.31387	4.50535	NA	3.86841	NA	Low	High	Low_High
BRD:BRD-K62008436-001-22-1	ACH-000580	-3.55824	PACLITAXEL	2.5	C32_SKIN	Male	SKIN	Skin	Melanoma	Cutaneous melanoma	0	WT	3.00002	4.92997	4.82132	3.45545	NA	4.68426	NA	Low	High	Low_High
BRD:BRD-K62008436-001-22-1	ACH-000582	-2.85847	PACLITAXEL	2.5	COLO741_SKIN	Unknown	SKIN	NA	NA	NA	0	WT	3.34688	3.69722	4.78808	4.49426	NA	NA	NA	Low	NA	Low_NA
BRD:BRD-K62008436-001-22-1	ACH-000587	-2.37859	PACLITAXEL	2.5	NCIH1975_LUNG	Female	LUNG	Lung	Non-Small Cell Lung Carcinoma	Lung Adenocarcinoma	2	Mutant	3.09589	6.53072	4.53184	4.42737	3.83666	3.88759	NA	Low	Low	Low_Low
BRD:BRD-K62008436-001-22-1	ACH-000589	-3.1827	PACLITAXEL	2.5	NCIH1437_LUNG	Male	LUNG	Lung	Non-Small Cell Lung Carcinoma	Lung Adenocarcinoma	2	Mutant	3.41414	3.82845	3.9303	4.38158	NA	3.69239	1.06067	Low	Low	Low_Low
BRD:BRD-K62008436-001-22-1	ACH-000590	-0.314131	PACLITAXEL	2.5	NA	Unknown	NA	NA	NA	NA	1	Mutant	3.25931	4.65932	3.54514	1.79259	NA	NA	NA	Low	NA	Low_NA
BRD:BRD-K62008436-001-22-1	ACH-000592	-2.67609	PACLITAXEL	2.5	TM31_CENTRAL_NERVOUS_SYSTEM	Unknown	CENTRAL_NERVOUS_SYSTEM	NA	NA	NA	2	Mutant	3.84764	5.04001	4.43134	5.07885	NA	NA	NA	High	NA	High_NA
BRD:BRD-K62008436-001-22-1	ACH-000593	-2.64217	PACLITAXEL	2.5	BC3C_URINARY_TRACT	Unknown	URINARY_TRACT	NA	NA	NA	2	Mutant	3.36298	6.25791	4.54429	4.31616	NA	NA	NA	Low	NA	Low_NA
BRD:BRD-K62008436-001-22-1	ACH-000595	-2.34178	PACLITAXEL	2.5	LN229_CENTRAL_NERVOUS_SYSTEM	Female	CENTRAL_NERVOUS_SYSTEM	Central Nervous System	Glioblastoma	NA	0	WT	3.67675	5.30834	4.54373	2.59074	NA	3.70584	NA	High	Low	High_Low
BRD:BRD-K62008436-001-22-1	ACH-000597	-1.43862	PACLITAXEL	2.5	TTC709_SOFT_TISSUE	Unknown	SOFT_TISSUE	NA	NA	NA	0	WT	5.44778	5.99639	4.38949	4.53162	NA	NA	NA	High	NA	High_NA
BRD:BRD-K62008436-001-22-1	ACH-000599	-1.5723	PACLITAXEL	2.5	PATU8902_PANCREAS	Female	PANCREAS	Pancreas	Pancreatic Carcinoma	Pancreatic adenocarcinoma	2	Mutant	2.88644	6.76655	4.20921	5.05393	4.83305	3.5949	NA	Low	Low	Low_Low
BRD:BRD-K62008436-001-22-1	ACH-000601	-3.06926	PACLITAXEL	2.5	MIAPACA2_PANCREAS	Male	PANCREAS	Pancreas	Pancreatic Carcinoma	Pancreatic ductal adenocarcinoma	2	Mutant	2.75128	6.02192	3.91157	3.39288	4.66259	3.21672	NA	Low	Low	Low_Low
BRD:BRD-K62008436-001-22-1	ACH-000603	-1.31467	PACLITAXEL	2.5	BEN_LUNG	Male	LUNG	Lung	Non-Small Cell Lung Carcinoma	NA	2	Mutant	3.67027	3.8994	4.70266	3.38354	NA	4.784	NA	High	High	High_High
BRD:BRD-K62008436-001-22-1	ACH-000605	-3.54382	PACLITAXEL	2.5	TE6_OESOPHAGUS	Male	OESOPHAGUS	Esophagus	Esophageal Carcinoma	Esophageal Squamous Cell Carcinoma	2	Mutant	3.80179	6.25225	5.1517	4.99482	3.18362	4.37109	NA	High	High	High_High
BRD:BRD-K62008436-001-22-1	ACH-000608	-0.734656	PACLITAXEL	2.5	COV644_OVARY	Female	OVARY	NA	NA	NA	0	WT	4.31936	1.4662	3.42247	4.11664	NA	NA	NA	High	NA	High_NA
BRD:BRD-K62008436-001-22-1	ACH-000609	-4.24814	PACLITAXEL	2.5	SF126_CENTRAL_NERVOUS_SYSTEM	Female	CENTRAL_NERVOUS_SYSTEM	Central Nervous System	Glioblastoma	NA	0	WT	3.2693	2.43789	5.34766	4.62481	NA	4.17849	NA	Low	High	Low_High
BRD:BRD-K62008436-001-22-1	ACH-000613	-3.34448	PACLITAXEL	2.5	HOS_BONE	Female	BONE	Bone	Osteosarcoma	NA	2	Mutant	3.57518	6.64574	4.85798	4.29769	2.87303	3.47386	NA	Low	Low	Low_Low
BRD:BRD-K62008436-001-22-1	ACH-000614	-1.06907	PACLITAXEL	2.5	RVH421_SKIN	Male	SKIN	Skin	Melanoma	NA	0	WT	2.98629	5.79902	3.99651	2.93522	NA	3.64887	NA	Low	Low	Low_Low
BRD:BRD-K62008436-001-22-1	ACH-000616	-1.46953	PACLITAXEL	2.5	NA	Male	NA	Stomach	Gastric Carcinoma	Gastric adenocarcinoma	0	WT	3.39728	3.13783	5.28707	5.25419	NA	4.39921	NA	High	High	High_High
BRD:BRD-K62008436-001-22-1	ACH-000617	-0.903563	PACLITAXEL	2.5	NA	Female	NA	Ovary	Ovarian Carcinoma	High grade ovarian serous adenocarcinoma	2	Mutant	3.03546	4.855	3.62793	4.54578	2.88077	2.97114	NA	Low	Low	Low_Low
BRD:BRD-K62008436-001-22-1	ACH-000618	-3.70697	PACLITAXEL	2.5	SNU1041_UPPER_AERODIGESTIVE_TRACT	Unknown	UPPER_AERODIGESTIVE_TRACT	NA	NA	NA	2	Mutant	3.95145	5.46494	3.93874	3.3346	NA	NA	NA	High	NA	High_NA
BRD:BRD-K62008436-001-22-1	ACH-000619	-2.77021	PACLITAXEL	2.5	PECAPJ15_UPPER_AERODIGESTIVE_TRACT	Male	UPPER_AERODIGESTIVE_TRACT	Head and Neck	Head and Neck Carcinoma	Tongue Squamous Cell Carcinoma	2	Mutant	2.53139	5.60525	4.34249	3.55445	4.12376	4.44442	NA	Low	High	Low_High
BRD:BRD-K62008436-001-22-1	ACH-000620	-1.77881	PACLITAXEL	2.5	JHH1_LIVER	Male	LIVER	Liver	Hepatocellular Carcinoma	NA	0	WT	5.04782	4.85153	4.41791	3.93343	NA	4.27184	NA	High	High	High_High
BRD:BRD-K62008436-001-22-1	ACH-000622	-4.62619	PACLITAXEL	2.5	KNS42_CENTRAL_NERVOUS_SYSTEM	Male	CENTRAL_NERVOUS_SYSTEM	Central Nervous System	Glioblastoma	NA	2	Mutant	4.0358	4.98372	5.98688	5.24089	NA	5.19955	NA	High	High	High_High
BRD:BRD-K62008436-001-22-1	ACH-000623	-2.30261	PACLITAXEL	2.5	SNU201_CENTRAL_NERVOUS_SYSTEM	Unknown	CENTRAL_NERVOUS_SYSTEM	NA	NA	NA	1	Mutant	3.03713	6.92487	5.49398	3.94373	NA	NA	NA	Low	NA	Low_NA
BRD:BRD-K62008436-001-22-1	ACH-000624	-1.18252	PACLITAXEL	2.5	HCC1806_BREAST	Female	BREAST	Breast	Breast Carcinoma	Breast squamous cell carcinoma	0	WT	2.73296	3.84116	4.45903	4.30437	NA	4.72365	NA	Low	High	Low_High
BRD:BRD-K62008436-001-22-1	ACH-000625	-1.45786	PACLITAXEL	2.5	HEP3B217_LIVER	Male	LIVER	Liver	Hepatocellular Carcinoma	NA	0	WT	3.75243	4.48271	4.26312	2.58404	NA	3.23904	NA	High	Low	High_Low
BRD:BRD-K62008436-001-22-1	ACH-000627	-4.25483	PACLITAXEL	2.5	LCLC103H_LUNG	Male	LUNG	Lung	Non-Small Cell Lung Carcinoma	Lung large cell carcinoma	2	Mutant	2.5662	5.5331	4.91379	4.13077	NA	3.91428	NA	Low	Low	Low_Low
BRD:BRD-K62008436-001-22-1	ACH-000628	-0.930993	PACLITAXEL	2.5	NCIH596_LUNG	Male	LUNG	Lung	Non-Small Cell Lung Carcinoma	Adenosquamous lung carcinoma	2	Mutant	3.30166	6.37636	5.13231	4.44233	1.84835	4.52063	NA	Low	High	Low_High
BRD:BRD-K62008436-001-22-1	ACH-000630	-2.0109	PACLITAXEL	2.5	YD8_UPPER_AERODIGESTIVE_TRACT	Unknown	UPPER_AERODIGESTIVE_TRACT	NA	NA	NA	2	Mutant	3.56241	6.86202	5.16673	3.89924	NA	NA	NA	High	NA	High_NA
BRD:BRD-K62008436-001-22-1	ACH-000631	-0.305889	PACLITAXEL	2.5	KS1_CENTRAL_NERVOUS_SYSTEM	Female	CENTRAL_NERVOUS_SYSTEM	Central Nervous System	Glioblastoma	NA	0	WT	3.59012	5.59771	4.87621	4.044	NA	4.36572	NA	High	High	High_High
BRD:BRD-K62008436-001-22-1	ACH-000632	-3.83907	PACLITAXEL	2.5	HS944T_SKIN	Unknown	SKIN	NA	NA	NA	0	WT	3.17077	3.92448	3.81886	2.32652	NA	NA	NA	Low	NA	Low_NA
BRD:BRD-K62008436-001-22-1	ACH-000637	-1.68837	PACLITAXEL	2.5	KYSE520_OESOPHAGUS	Female	OESOPHAGUS	Esophagus	Esophageal Carcinoma	Esophageal Squamous Cell Carcinoma	0	WT	3.25501	5.67754	4.98078	4.55021	NA	4.0781	NA	Low	Low	Low_Low
BRD:BRD-K62008436-001-22-1	ACH-000638	-1.04725	PACLITAXEL	2.5	NCIH441_LUNG	Male	LUNG	Lung	Non-Small Cell Lung Carcinoma	Lung Adenocarcinoma	2	Mutant	4.01195	5.74212	4.27799	4.78157	NA	4.21684	NA	High	High	High_High
BRD:BRD-K62008436-001-22-1	ACH-000643	-3.47603	PACLITAXEL	2.5	HDQP1_BREAST	Female	BREAST	Breast	Breast Carcinoma	NA	2	Mutant	2.84718	3.64157	3.8646	3.10907	NA	4.18591	NA	Low	High	Low_High
BRD:BRD-K62008436-001-22-1	ACH-000644	-1.26591	PACLITAXEL	2.5	NA	Male	NA	Skin	Melanoma	Cutaneous melanoma	0	WT	3.34147	4.87471	4.18438	3.1578	NA	3.5482	NA	Low	Low	Low_Low
[truncated: 245 more rows]

## Sheet: SuppFigure4A_stats
tissue	Drug.Name	n_high	n_low	median_high	median_low	median_fc	p_value	signed_pval	significance
[truncated: 66 more rows]

[truncated: 1 more sheets: SuppFigure4B_stats]
